# Supplementary material for: Immunopeptidome mining reveals a novel ERS-induced target in T1D
Source: Research Square preprint supplement (doi:10.21203/rs.3.rs-2997556/v1), 2023-06-09
Supplement: Supplementary file 1 [file 00142d6fc6a0f2e62e9c4c20.docx]

Supplementary figure legends

**Figure S1. HG and TG treatment increases the visibility of NIT-1 cells to NOD mouse CD4- splenocytes by inducing continuous endoplasmic reticulum stress.**

**(A)** Representative ELISPOT images showing IFN-γ production by NOD mouse CD4- splenocytes stimulated with NIT-1 cells pre-treated with 0-(NC), 10-, 20- or 30-mM glucose for 24h or 48h. Pos: NOD mouse CD4- splenocytes stimulated with PMA plus ionomycin. Neg: NOD mouse CD4- splenocytes alone.

**(B)** Summary data for the assay in (A) showing the mean IFN-γ spots number per 1x105 NOD mouse CD4- splenocytes in duplicated cultures.

**(C)** Summary data showing IFN-γ release by NOD mouse CD4- splenocytes stimulated with NIT-1 cells pre-treated with 20 mM glucose for 24h was significantly weakened by anti-mouse H-2Kd antibody.

**(D)** Representative images showing IFN-γ production by NOD mouse CD4- splenocytes stimulated with NIT-1 cells pre-treated with 0-(NC), 1-, 5-, 10μM TG for 0.5h or 1h. Pos: NOD mouse CD4- splenocytes stimulated with PMA plus ionomycin. Neg: NOD mouse CD4- splenocytes alone.

**(E)** Summary data for the assay in (D) showing the mean IFN-γ spots number per 1x105 NOD mouse CD4- splenocytes in duplicated cultures.

**(F)** Summary data showing the immunostimulatory ability of NIT-1 cells pre-treated with 5μM TG for 0.5h was significantly weakened by anti-mouse H-2Kd antibody. ELISPOT results are representative of three independent experiments and presented as mean ±SD (*p < 0.05, ***p < 0.001, ****p < 0.0001 by Student’s t test).

**(G)** H-2Kd and H2-Db Expression on the Surface of NIT-1 Cells.

**(H)** Quantitative PCR analysis of the ERS markers relative mRNA expression in NIT-1 cells (NC) or NIT-1 cells withdrawal HG or TG within 24h. The mRNA expression level is presented as fold-change compared to the mRNA levels expressed in NIT-1 cell (NC), Data are expressed as the mean ± SEM in triplicated cultures from three independent experiments. *p < 0.05, **p < 0.01, ***p < 0.001, ****p < 0.0001 by Student’s t test.

**(I)** Western blot analysis of the ERS markers expression in NIT-1 cell (NC) or NIT-1 cells withdrawal HG or TG within 24h.

**(J)** Representative ELISPOT images(left) showing IFN-γ production by NOD mouse splenocytes stimulated with NIT-1 cells pre-treated with 0 (control), 20 mM glucose (HG), 20 mM glucose with 250μmol/L TUDCA (HG+TUDCA), 5μM TG (TG) or 5μM TG with 250μmol/L TUDCA(TG+TUDCA). Summary data (right) showing the mean IFN-γ spots number per 1x105 NOD mouse splenocytes in triplicated cultures, *p < 0.05, determined by Student’s t test.

**Figure S2. Characterization of H-2Db restricted peptides in MIP derived from NIT-1 cells.**

**(A)** The total numbers of H2-Db-restricted peptides and their potential source proteins in the MIP derived from NIT-1-NC, NIT-1-HG and NIT-1-TG cells.

**(B)** The length distributions of MIP derived from NIT-1-NC, NIT-1-HG and NIT-1-TG cells (8-11 amino acids).

**(C)** The predicted affinities of peptides by netMHC (version 4.0), SB: strong binder (rank<0.5%); WB: weak binder (rank:0.5%-2%).

**(D)** The binding motifs of 9-mer peptides identified in the MIP. The x-axis represents the residue position within the 9-mer peptide sequence. The y-axis represents the information content, with the size of each amino acid symbol proportional to its frequency.

**Figure S3. Identification of NOD mouse bone marrow derived DC.**

**Figure S4. Comparison of the secondary mass spectra map between the synthetic peptide and the corresponding endogenous candidate peptides.**

**(A-C)** The secondary mass spectra map of endogenous and synthetic peptide WDR70530-538(A), SYT12291-299 (B) and OTUB258-66 (C), the upper is the mass spectra of endogenous peptide, the lower is the mass spectra of corresponding synthetic peptide.

**Figure S5. Phenotypic analysis of peptide-specific CD8+ dextramer+ T cells in NOD and ICR mice. (A)** Representative FACS plots showing the gating strategy for detection of CD8+ Dextramer+ T cells.

**(B)** Representative FACS plots of CD8+ Dextramer+ T cells in the spleens of ICR mice.

**(C)** Representative FACS histogram showing CD107 expression on the surface of splenic CD8+ Dextramer+ T cells in ICR mice.

**(D)** Representative FACS histogram showing CD107 expression on the surface of CD8+ Dextramer+ T cells in NOD mice spleen, pancreas and pancreas draining lymph node(pLN).

**(E)** Representative FACS plots showing CD44 and CD62L expression on the surface of CD8+ Dextramer+ T cells in NOD mice spleen, pancreas and pancreas draining lymph node(pLN).

**Figure S6.** **Repeated vaccination with peptides OTUB258-66 increases Annexin V, FAS and PD-1 expression on the surface of pancreas-infiltrating T cells of NOD mice.**

**(A)** Representative FACS plots (left) and a summary data (right) showing Annexin V, FAS and PD-1 expression on the surface of CD8+ Dextramer+ T cells in the pancreases of NOD mice after 3 injections with peptide OTUB258-66 mixed with poly IC (OTUB258-66) or poly IC alone (Control). Data is representative of two independent experiments and presented as mean ±SD (n=4 per group).

**(B)** Representative FACS plots (left) and a summary data (right) showing Annexin V, FAS and PD-1 expression on the surface of CD3+ CD8- (mainly CD4+ T) cells in the pancreases of NOD mice after 3 injections with peptide OTUB258-66 mixed with poly IC (OTUB258-66) or poly IC alone (Control). Data is representative of two independent experiments and presented as mean ±SD (n=6 per group).

**(C)** Representative FACS plots (left) and a summary data (right) showing Annexin V, FAS and PD-1 expression on the surface of CD3+ CD8+ T cells in the pancreases of NOD mice after 3 injections with peptide OTUB258-66 mixed with poly IC (OTUB258-66) or poly IC alone (Control). Data is representative of two independent experiments and presented as mean ±SD (n=6 per group). *P<0.05, ***p <0.001, ****p <0.0001, determined by Student’s t test.
