# Supplementary material for: Immunopeptidome mining reveals a novel ERS-induced target in T1D
Source: Research Square preprint supplement (doi:10.21203/rs.3.rs-2997556/v1), 2023-06-09
Supplement: Supplementary file 2 [file 3fcde552e1005bfa0be207b1.xlsx]

## Sheet:  Unique peptide source proteins
Protein.accession	setname.x	setname.y	Sequence	HLA	Length	BindLevel	Affinity.nM.	Tool	variable	value	Sample	Position	Protein.description	X.Rank
A2A7S8	HG∩TG	(HG)∖(Control)	SFIFSKGTK	H-2-Kd	9	WB	2112.19	PD Mascot	HG	30000000	HG_1c	891_899	Uncharacterized protein KIAA1522 OS=Mus musculus OX=10090 GN=Kiaa1522 PE=1 SV=1	1.3
A2A7S8	HG∩TG	(TG)∖(Control)	SFIFSKGTK	H-2-Kd	9	WB	2112.19	PD Mascot	TG	3800000	TG_1a	891_899	Uncharacterized protein KIAA1522 OS=Mus musculus OX=10090 GN=Kiaa1522 PE=1 SV=1	1.3
A2AGL3	(TG)∖(HG)	(TG)∖(Control)	LYFLSSPLKPL	H-2-Kd	11	WB	896.63	PD Mascot	TG	2000000	TG_1a	2873_2883	Ryanodine receptor 3 OS=Mus musculus OX=10090 GN=Ryr3 PE=1 SV=1	0.7
A2AKB9	(TG)∖(HG)	(TG)∖(Control)	GYLLILHEL	H-2-Kd	9	SB	174.24	Maxquant	TG	4036500	TG_1b	326_334	DDB1- and CUL4-associated factor 10 OS=Mus musculus OX=10090 GN=Dcaf10 PE=1 SV=1	0.17
B2RR83	(TG)∖(HG)	(TG)∖(Control)	FQGFSRMSSEI	H-2-Kd	11	WB	891.16	PD Mascot	TG	3600000	TG_1a	1356_1366	3'-5' RNA helicase YTHDC2 OS=Mus musculus OX=10090 GN=Ythdc2 PE=1 SV=1	0.7
E9Q555	(HG)∖(TG)	(HG)∖(Control)	VYVRGGEGL	H-2-Kd	9	SB	472.51	PD Mascot	HG	2400000	HG_1c	368_376	E3 ubiquitin-protein ligase RNF213 OS=Mus musculus OX=10090 GN=Rnf213 PE=1 SV=2	0.4
F8VPN2	(TG)∖(HG)	(TG)∖(Control)	YLRSILSSI	H-2-Kd	9	WB	2139.4	PD Mascot	TG	8100000	TG_1a	126_134	Testis-expressed protein 15 OS=Mus musculus OX=10090 GN=Tex15 PE=2 SV=1	1.3
O08650	(HG)∖(TG)	(HG)∖(Control)	KHHLWMTYESV	H-2-Kd	11	WB	2880.27	PD Mascot	HG	5900000	HG_2c	374_384	Hyaluronan synthase 3 OS=Mus musculus OX=10090 GN=Has3 PE=1 SV=2	1.7
O35495	(TG)∖(HG)	(TG)∖(Control)	SYIHQRYIL	H-2-Kd	9	SB	134.47	Maxquant	TG	3097600	TG_1b	244_252	Cyclin-dependent kinase 14 OS=Mus musculus OX=10090 GN=Cdk14 PE=1 SV=2	0.12
O35902	(TG)∖(HG)	(TG)∖(Control)	GSYFSQKSLAY	H-2-Kd	11	WB	1755.93	PD Mascot	TG	3100000	TG_1c	768_778	Desmoglein-3 OS=Mus musculus OX=10090 GN=Dsg3 PE=2 SV=1	1.1
O70443	(TG)∖(HG)	(TG)∖(Control)	YYLNDLERI	H-2-Kd	9	SB	145.12	Maxquant	TG	5499700	TG_1a	154_162	Guanine nucleotide-binding protein G(z) subunit alpha OS=Mus musculus OX=10090 GN=Gnaz PE=1 SV=4	0.15
P00405	(TG)∖(HG)	(TG)∖(Control)	KYFENWSASMI	H-2-Kd	11	SB	35.43	PD Mascot	TG	2000000	TG_1a	216_226	Cytochrome c oxidase subunit 2 OS=Mus musculus OX=10090 GN=Mtco2 PE=1 SV=1	0.03
P0DPD9	HG∩TG	(TG)∖(Control)	YYLPTKNEI	H-2-Kd	9	SB	10.29	PD Mascot	TG	6700000	TG_1c	678_686	EEF1AKMT4-ECE2 readthrough transcript protein OS=Mus musculus OX=10090 GN=Eef1akmt4-Ece2 PE=1 SV=1	0.01
P0DPD9	HG∩TG	(HG)∖(Control)	YYLPTKNEI	H-2-Kd	9	SB	10.29	Maxquant	HG	912800	HG_2c	678_686	EEF1AKMT4-ECE2 readthrough transcript protein OS=Mus musculus OX=10090 GN=Eef1akmt4-Ece2 PE=1 SV=1	0.01
P11157	(HG)∖(TG)	(HG)∖(Control)	MLSVRTPL	H-2-Kd	8	WB	2355.58	PD Mascot	HG	15000000	HG_2a	0_7	Ribonucleoside-diphosphate reductase subunit M2 OS=Mus musculus OX=10090 GN=Rrm2 PE=1 SV=1	1.4
P14206	(TG)∖(HG)	(TG)∖(Control)	KFLAAGTHL	H-2-Kd	9	SB	39.66	PD Sequest	TG	2500000	TG_1c	16_24	40S ribosomal protein SA OS=Mus musculus OX=10090 GN=Rpsa PE=1 SV=4	0.03
P16858	(HG)∖(TG)	(HG)∖(Control)	GLMTTVHAI	H-2-Kd	9	SB	628.47	PD Mascot	HG	3000000	HG_2b	170_178	Glyceraldehyde-3-phosphate dehydrogenase OS=Mus musculus OX=10090 GN=Gapdh PE=1 SV=2	0.5
P18872	(TG)∖(HG)	(TG)∖(Control)	YYLDSLDRI	H-2-Kd	9	SB	49.12	PD Mascot	TG	6700000	TG_1c	154_162	Guanine nucleotide-binding protein G(o) subunit alpha OS=Mus musculus OX=10090 GN=Gnao1 PE=1 SV=3	0.04
P24270	HG∩TG	(TG)∖(Control)	GYFEVTHDI	H-2-Kd	9	SB	56.88	Maxquant	TG	1476300	TG_2c	82_90	Catalase OS=Mus musculus OX=10090 GN=Cat PE=1 SV=4	0.05
P24270	HG∩TG	(HG)∖(Control)	GYFEVTHDI	H-2-Kd	9	SB	56.88	Maxquant	HG	1749800	HG_2b	82_90	Catalase OS=Mus musculus OX=10090 GN=Cat PE=1 SV=4	0.05
P26039	(TG)∖(HG)	(TG)∖(Control)	GYLELLDHV	H-2-Kd	9	SB	138.2	PD Sequest	TG	6000000	TG_1b	2245_2253	Talin-1 OS=Mus musculus OX=10090 GN=Tln1 PE=1 SV=2	0.12
P26040	(TG)∖(HG)	(TG)∖(Control)	GYLSSERLI	H-2-Kd	9	SB	56.63	PD Mascot	TG	1900000	TG_1a	144_152	Ezrin OS=Mus musculus OX=10090 GN=Ezr PE=1 SV=3	0.05
P28700	(TG)∖(HG)	(TG)∖(Control)	IFDRVLTEL	H-2-Kd	9	WB	1876.18	PD Sequest	TG	6400000	TG_1b	349_357	Retinoic acid receptor RXR-alpha OS=Mus musculus OX=10090 GN=Rxra PE=1 SV=1	1.2
P39054	(TG)∖(HG)	(TG)∖(Control)	SYVAIINKSI	H-2-Kd	10	SB	84.09	PD Mascot	TG	4100000	TG_1c	661_670	Dynamin-2 OS=Mus musculus OX=10090 GN=Dnm2 PE=1 SV=2	0.08
P42227	(TG)∖(HG)	(TG)∖(Control)	RYLEQLHQL	H-2-Kd	9	SB	120.31	PD Mascot	TG	12000000	TG_1c	12_20	Signal transducer and activator of transcription 3 OS=Mus musculus OX=10090 GN=Stat3 PE=1 SV=2	0.12
P42859	(TG)∖(HG)	(TG)∖(Control)	SYWLVRTEL	H-2-Kd	9	SB	15.73	Maxquant	TG	5376400	TG_1b	839_847	Huntingtin OS=Mus musculus OX=10090 GN=Htt PE=1 SV=2	0.01
P51943	(TG)∖(HG)	(TG)∖(Control)	RFLSSMSVL	H-2-Kd	9	SB	215.12	Maxquant	TG	2451600	TG_2c	230_238	Cyclin-A2 OS=Mus musculus OX=10090 GN=Ccna2 PE=1 SV=2	0.2
P54775	(TG)∖(HG)	(TG)∖(Control)	YYVRILSTI	H-2-Kd	9	SB	8.47	PD Mascot	TG	2900000	TG_1c	110_118	26S proteasome regulatory subunit 6B OS=Mus musculus OX=10090 GN=Psmc4 PE=1 SV=2	0.01
P61202	(TG)∖(HG)	(TG)∖(Control)	RYKQLLTYI	H-2-Kd	9	SB	19.69	PD Mascot	TG	11000000	TG_1b	90_98	COP9 signalosome complex subunit 2 OS=Mus musculus OX=10090 GN=Cops2 PE=1 SV=1	0.01
P61222	(TG)∖(HG)	(TG)∖(Control)	SYLDVKQRL	H-2-Kd	9	SB	41.62	Maxquant	TG	4054500	TG_1a	244_252	ATP-binding cassette sub-family E member 1 OS=Mus musculus OX=10090 GN=Abce1 PE=1 SV=1	0.03
P97287	(TG)∖(HG)	(TG)∖(Control)	LYRQSLEII	H-2-Kd	9	SB	445.13	PD Mascot	TG	18000000	TG_1c	154_162	Induced myeloid leukemia cell differentiation protein Mcl-1 homolog OS=Mus musculus OX=10090 GN=Mcl1 PE=1 SV=3	0.4
P97858	HG∩TG	(TG)∖(Control)	YYGILQEKI	H-2-Kd	9	WB	800.09	Maxquant	TG	3709300	TG_1a	26_34	Solute carrier family 35 member B1 OS=Mus musculus OX=10090 GN=Slc35b1 PE=1 SV=1	0.6
P97858	HG∩TG	(HG)∖(Control)	YYGILQEKI	H-2-Kd	9	WB	800.09	Maxquant	HG	716480	HG_2b	26_34	Solute carrier family 35 member B1 OS=Mus musculus OX=10090 GN=Slc35b1 PE=1 SV=1	0.6
Q00690	(TG)∖(HG)	(TG)∖(Control)	TAWYYNASSEL	H-2-Kd	11	SB	140.06	PD Mascot	TG	3600000	TG_1a	19_29	E-selectin OS=Mus musculus OX=10090 GN=Sele PE=2 SV=1	0.12
Q02384	(TG)∖(HG)	(TG)∖(Control)	YYDLVRTEI	H-2-Kd	9	SB	26.54	PD Sequest	TG	5100000	TG_1b	199_207	Son of sevenless homolog 2 OS=Mus musculus OX=10090 GN=Sos2 PE=1 SV=2	0.02
Q05A80	(TG)∖(HG)	(TG)∖(Control)	KYEEVLHNL	H-2-Kd	9	SB	64.16	PD Sequest	TG	5900000	TG_1c	84_92	Caprin-2 OS=Mus musculus OX=10090 GN=Caprin2 PE=1 SV=1	0.06
Q0P678	(HG)∖(TG)	(HG)∖(Control)	YADLASPV	H-2-Kd	8	SB	533.38	PD Mascot	HG	2500000	HG_1a	727_734	Zinc finger CCCH domain-containing protein 18 OS=Mus musculus OX=10090 GN=Zc3h18 PE=1 SV=1	0.5
Q11204	(TG)∖(HG)	(TG)∖(Control)	TYAPVKSFL	H-2-Kd	9	SB	16.05	PD Mascot	TG	12000000	TG_1b	238_246	CMP-N-acetylneuraminate-beta-galactosamide-alpha-2,3-sialyltransferase 2 OS=Mus musculus OX=10090 GN=St3gal2 PE=1 SV=2	0.01
Q3TWF6	HG∩TG	(HG)∖(Control)	DYIITPHAL	H-2-Kd	9	SB	166.79	PD Mascot	HG	4000000	HG_2b	530_538	WD repeat-containing protein 70 OS=Mus musculus OX=10090 GN=Wdr70 PE=1 SV=1	0.15
Q3TWF6	HG∩TG	(TG)∖(Control)	DYIITPHAL	H-2-Kd	9	SB	166.79	PD Mascot	TG	12000000	TG_1b	530_538	WD repeat-containing protein 70 OS=Mus musculus OX=10090 GN=Wdr70 PE=1 SV=1	0.15
Q3TWI9	(HG)∖(TG)	(HG)∖(Control)	AYSFGRTTI	H-2-Kd	9	SB	15.08	PD Mascot	HG	4000000	HG_2a	186_194	CSC1-like protein 2 OS=Mus musculus OX=10090 GN=Tmem63b PE=1 SV=1	0.01
Q3TZX8	(TG)∖(HG)	(TG)∖(Control)	KYNRIFRDL	H-2-Kd	9	SB	186.73	PD Mascot	TG	4800000	TG_1b	530_538	Polynucleotide 5'-hydroxyl-kinase NOL9 OS=Mus musculus OX=10090 GN=Nol9 PE=1 SV=1	0.17
Q3U0D9	(TG)∖(HG)	(TG)∖(Control)	QYLKILTGL	H-2-Kd	9	SB	89.87	PD Mascot	TG	15000000	TG_1b	286_294	E3 ubiquitin-protein ligase HACE1 OS=Mus musculus OX=10090 GN=Hace1 PE=1 SV=1	0.09
Q3U1J4	(TG)∖(HG)	(TG)∖(Control)	YYLQIHPQEL	H-2-Kd	10	SB	351	PD Mascot	TG	15000000	TG_1a	516_525	DNA damage-binding protein 1 OS=Mus musculus OX=10090 GN=Ddb1 PE=1 SV=2	0.3
Q3U285	(TG)∖(HG)	(TG)∖(Control)	SYLHQLTLQKM	H-2-Kd	11	WB	961.01	PD Mascot	TG	2300000	TG_2c	378_388	Ligand-dependent nuclear receptor corepressor-like protein OS=Mus musculus OX=10090 GN=Lcorl PE=2 SV=1	0.7
Q3UMC0	(TG)∖(HG)	(TG)∖(Control)	YFISSTTRI	H-2-Kd	9	SB	29.64	PD Mascot	TG	1400000	TG_2b	323_331	ATPase family protein 2 homolog OS=Mus musculus OX=10090 GN=Spata5 PE=1 SV=2	0.02
Q3UQ44	(TG)∖(HG)	(TG)∖(Control)	KYQDILNEI	H-2-Kd	9	SB	27.79	PD Sequest	TG	2600000	TG_2b	1391_1399	Ras GTPase-activating-like protein IQGAP2 OS=Mus musculus OX=10090 GN=Iqgap2 PE=1 SV=2	0.02
Q3UWM4	(TG)∖(HG)	(TG)∖(Control)	IFTSVRSEL	H-2-Kd	9	SB	275.89	PD Mascot	TG	4700000	TG_1b	640_648	Lysine-specific demethylase 7A OS=Mus musculus OX=10090 GN=Kdm7a PE=2 SV=2	0.25
Q3V129	(TG)∖(HG)	(TG)∖(Control)	SYGTILSHI	H-2-Kd	9	SB	10.7	PD Mascot	TG	4000000	TG_1b	872_880	Serine/threonine-protein kinase ULK4 OS=Mus musculus OX=10090 GN=Ulk4 PE=1 SV=2	0.01
Q45VK7	HG∩TG	(HG)∖(Control)	EYLQNLNHI	H-2-Kd	9	SB	61.61	Maxquant	HG	790890	HG_2b	1336_1344	Cytoplasmic dynein 2 heavy chain 1 OS=Mus musculus OX=10090 GN=Dync2h1 PE=1 SV=1	0.06
Q45VK7	HG∩TG	(TG)∖(Control)	EYLQNLNHI	H-2-Kd	9	SB	61.61	Maxquant	TG	2678500	TG_1a	1336_1344	Cytoplasmic dynein 2 heavy chain 1 OS=Mus musculus OX=10090 GN=Dync2h1 PE=1 SV=1	0.06
Q4VC17	(TG)∖(HG)	(TG)∖(Control)	SYISHDILHHR	H-2-Kd	11	WB	2184.31	PD Mascot	TG	2300000	TG_2c	74_84	A disintegrin and metalloproteinase with thrombospondin motifs 18 OS=Mus musculus OX=10090 GN=Adamts18 PE=2 SV=2	1.4
Q562E2	(TG)∖(HG)	(TG)∖(Control)	TYEPMKVALKT	H-2-Kd	11	WB	1999.92	PD Mascot	TG	1100000	TG_1c	358_368	BTB/POZ domain-containing protein KCTD19 OS=Mus musculus OX=10090 GN=Kctd19 PE=1 SV=2	1.3
Q5SUS0	(TG)∖(HG)	(TG)∖(Control)	AYQNQETQL	H-2-Kd	9	SB	33.83	PD Mascot	TG	11000000	TG_1c	396_404	F-box/WD repeat-containing protein 10 OS=Mus musculus OX=10090 GN=Fbxw10 PE=2 SV=1	0.03
Q5U3K5	HG∩TG	(HG)∖(Control)	SYFRYAESSM	H-2-Kd	10	SB	113.66	PD Mascot	HG	19000000	HG_2c	204_213	Rab-like protein 6 OS=Mus musculus OX=10090 GN=Rabl6 PE=1 SV=2	0.12
Q5U3K5	HG∩TG	(TG)∖(Control)	SYFRYAESSM	H-2-Kd	10	SB	113.66	PD Mascot	TG	14000000	TG_2b	204_213	Rab-like protein 6 OS=Mus musculus OX=10090 GN=Rabl6 PE=1 SV=2	0.12
Q60892	(TG)∖(HG)	(TG)∖(Control)	MYFFLANLSFV	H-2-Kd	11	WB	1547.24	PD Mascot	TG	5400000	TG_1b	59_69	Olfactory receptor 8 OS=Mus musculus OX=10090 GN=Olfr8 PE=3 SV=2	1
Q61151	(TG)∖(HG)	(TG)∖(Control)	KYIDQKFVL	H-2-Kd	9	SB	226.71	PD Mascot	TG	17000000	TG_1b	173_181	Serine/threonine-protein phosphatase 2A 56 kDa regulatory subunit epsilon isoform OS=Mus musculus OX=10090 GN=Ppp2r5e PE=1 SV=3	0.2
Q61152	(HG)∖(TG)	(HG)∖(Control)	QAYIATQGPL	H-2-Kd	10	WB	912.38	PD Mascot	HG	2900000	HG_1a	98_107	Tyrosine-protein phosphatase non-receptor type 18 OS=Mus musculus OX=10090 GN=Ptpn18 PE=1 SV=1	0.7
Q61823	(TG)∖(HG)	(TG)∖(Control)	GYERIYNEI	H-2-Kd	9	SB	54.08	PD Sequest	TG	4500000	TG_1b	403_411	Programmed cell death protein 4 OS=Mus musculus OX=10090 GN=Pdcd4 PE=1 SV=1	0.05
Q61846	HG∩TG	(TG)∖(Control)	KYYELYETI	H-2-Kd	9	SB	18.01	Maxquant	TG	17274000	TG_1c	8_16	Maternal embryonic leucine zipper kinase OS=Mus musculus OX=10090 GN=Melk PE=1 SV=2	0.01
Q61846	HG∩TG	(HG)∖(Control)	KYYELYETI	H-2-Kd	9	SB	18.01	Maxquant	HG	546870	HG_2c	8_16	Maternal embryonic leucine zipper kinase OS=Mus musculus OX=10090 GN=Melk PE=1 SV=2	0.01
Q61985	(TG)∖(HG)	(TG)∖(Control)	LYQEVFGRL	H-2-Kd	9	SB	281.92	Maxquant	TG	3730200	TG_1c	685_693	Endoplasmic reticulum membrane sensor NFE2L1 OS=Mus musculus OX=10090 GN=Nfe2l1 PE=1 SV=2	0.25
Q62280	(TG)∖(HG)	(TG)∖(Control)	PSQLSMTNSSM	H-2-Kd	11	WB	2218.49	PD Mascot	TG	14000000	TG_2b	139_149	Protein SSXT OS=Mus musculus OX=10090 GN=Ss18 PE=1 SV=2	1.4
Q62388	HG∩TG	(HG)∖(Control)	AYNPLPLTRL	H-2-Kd	10	WB	690.33	PD Mascot	HG	1900000	HG_2a	1607_1616	Serine-protein kinase ATM OS=Mus musculus OX=10090 GN=Atm PE=1 SV=2	0.6
Q62388	HG∩TG	(TG)∖(Control)	AYNPLPLTRL	H-2-Kd	10	WB	690.33	PD Sequest	TG	24000000	TG_1a	1607_1616	Serine-protein kinase ATM OS=Mus musculus OX=10090 GN=Atm PE=1 SV=2	0.6
Q640P4	(TG)∖(HG)	(TG)∖(Control)	FYVVGLRST	H-2-Kd	9	WB	708.61	PD Mascot	TG	3000000	TG_1b	81_89	Glycosyltransferase 8 domain-containing protein 2 OS=Mus musculus OX=10090 GN=Glt8d2 PE=2 SV=1	0.6
Q68FD7	(TG)∖(HG)	(TG)∖(Control)	AYNRILDAL	H-2-Kd	9	SB	95.81	PD Mascot	TG	3000000	TG_1c	388_396	Folliculin-interacting protein 1 OS=Mus musculus OX=10090 GN=Fnip1 PE=1 SV=1	0.09
Q6DIC0	(TG)∖(HG)	(TG)∖(Control)	SYYTVAHAI	H-2-Kd	9	SB	6.31	PD Mascot	TG	5700000	TG_1b	704_712	Probable global transcription activator SNF2L2 OS=Mus musculus OX=10090 GN=Smarca2 PE=1 SV=1	0.01
Q6NS46	(TG)∖(HG)	(TG)∖(Control)	LEYVEAKSSAL	H-2-Kd	11	SB	460.49	PD Mascot	TG	2300000	TG_2a	1849_1859	Protein RRP5 homolog OS=Mus musculus OX=10090 GN=Pdcd11 PE=1 SV=2	0.4
Q6P1B1	(TG)∖(HG)	(TG)∖(Control)	PYKSILSEL	H-2-Kd	9	SB	133.97	PD Mascot	TG	22000000	TG_1a	266_274	Xaa-Pro aminopeptidase 1 OS=Mus musculus OX=10090 GN=Xpnpep1 PE=1 SV=1	0.12
Q6PNC0	(TG)∖(HG)	(TG)∖(Control)	TYLVSKESI	H-2-Kd	9	SB	14.12	PD Mascot	TG	4400000	TG_1a	1120_1128	DmX-like protein 1 OS=Mus musculus OX=10090 GN=Dmxl1 PE=1 SV=1	0.01
Q7M759	(TG)∖(HG)	(TG)∖(Control)	FYIGLGSRI	H-2-Kd	9	SB	16.01	PD Mascot	TG	8500000	TG_1b	109_117	Alpha/beta hydrolase domain-containing protein 17B OS=Mus musculus OX=10090 GN=Abhd17b PE=1 SV=1	0.01
Q7TN98	(TG)∖(HG)	(TG)∖(Control)	QKYARPSSAFA	H-2-Kd	11	WB	1485.03	PD Mascot	TG	1600000	TG_1c	345_355	Cytoplasmic polyadenylation element-binding protein 4 OS=Mus musculus OX=10090 GN=Cpeb4 PE=1 SV=1	1
Q7TPS0	HG∩TG	(TG)∖(Control)	KYVYLVTDL	H-2-Kd	9	SB	71.62	PD Mascot	TG	69000000	TG_1a	510_518	Ribosomal protein S6 kinase alpha-6 OS=Mus musculus OX=10090 GN=Rps6ka6 PE=1 SV=2	0.07
Q7TPS0	HG∩TG	(HG)∖(Control)	KYVYLVTDL	H-2-Kd	9	SB	71.62	PD Sequest	HG	4900000	HG_2c	510_518	Ribosomal protein S6 kinase alpha-6 OS=Mus musculus OX=10090 GN=Rps6ka6 PE=1 SV=2	0.07
Q7TQK1	HG∩TG	(HG)∖(Control)	LYQSLLTQV	H-2-Kd	9	SB	20.03	PD Sequest	HG	6900000	HG_2a	544_552	Integrator complex subunit 7 OS=Mus musculus OX=10090 GN=Ints7 PE=1 SV=1	0.01
Q7TQK1	HG∩TG	(TG)∖(Control)	LYQSLLTQV	H-2-Kd	9	SB	20.03	PD Mascot	TG	32000000	TG_1a	544_552	Integrator complex subunit 7 OS=Mus musculus OX=10090 GN=Ints7 PE=1 SV=1	0.01
Q80TM9	(TG)∖(HG)	(TG)∖(Control)	VYNQLRASL	H-2-Kd	9	SB	150.02	PD Mascot	TG	4700000	TG_1b	996_1004	Nischarin OS=Mus musculus OX=10090 GN=Nisch PE=1 SV=2	0.15
Q80U87	(TG)∖(HG)	(TG)∖(Control)	KYVAVYNLI	H-2-Kd	9	SB	23.36	PD Sequest	TG	15000000	TG_1c	64_72	Ubiquitin carboxyl-terminal hydrolase 8 OS=Mus musculus OX=10090 GN=Usp8 PE=1 SV=2	0.01
Q80UP8	(TG)∖(HG)	(TG)∖(Control)	VTQEAATPV	H-2-Kd	9	WB	2466.86	Maxquant	TG	500970	TG_2a	526_534	Sodium-dependent phosphate transporter 2 OS=Mus musculus OX=10090 GN=Slc20a2 PE=1 SV=2	1.5
Q80V62	(TG)∖(HG)	(TG)∖(Control)	SYLQNFHHSV	H-2-Kd	10	SB	195.89	PD Mascot	TG	3300000	TG_1b	1113_1122	Fanconi anemia group D2 protein homolog OS=Mus musculus OX=10090 GN=Fancd2 PE=1 SV=2	0.17
Q80XE1	(TG)∖(HG)	(TG)∖(Control)	SYREGLTPVL	H-2-Kd	10	SB	391.51	PD Mascot	TG	5600000	TG_1b	357_366	Synembryn-B OS=Mus musculus OX=10090 GN=Ric8b PE=1 SV=2	0.4
Q80XH2	(TG)∖(HG)	(TG)∖(Control)	YYQSELTEEQH	H-2-Kd	11	WB	3274.92	PD Mascot	TG	12000000	TG_1b	852_862	Interphotoreceptor matrix proteoglycan 2 OS=Mus musculus OX=10090 GN=Impg2 PE=1 SV=1	1.9
Q810A3	(TG)∖(HG)	(TG)∖(Control)	RYLQLTQSEL	H-2-Kd	10	SB	375.5	PD Mascot	TG	13000000	TG_1b	145_154	Tetratricopeptide repeat protein 9C OS=Mus musculus OX=10090 GN=Ttc9c PE=1 SV=1	0.4
Q810P3	(TG)∖(HG)	(TG)∖(Control)	AYLSSRDSL	H-2-Kd	9	SB	16.39	PD Mascot	TG	8800000	TG_1a	196_204	Cyclin-dependent kinase inhibitor 3 OS=Mus musculus OX=10090 GN=Cdkn3 PE=2 SV=1	0.01
Q8BG40	(TG)∖(HG)	(TG)∖(Control)	SYVVDLTRV	H-2-Kd	9	SB	116.05	PD Mascot	TG	5500000	TG_1b	296_304	Katanin p80 WD40 repeat-containing subunit B1 OS=Mus musculus OX=10090 GN=Katnb1 PE=1 SV=1	0.12
Q8BJU0	(TG)∖(HG)	(TG)∖(Control)	AYSKLGNYV	H-2-Kd	9	SB	104.37	PD Mascot	TG	12000000	TG_1c	134_142	Small glutamine-rich tetratricopeptide repeat-containing protein alpha OS=Mus musculus OX=10090 GN=Sgta PE=1 SV=2	0.1
Q8BK58	(HG)∖(TG)	(HG)∖(Control)	HYVESLDPVT	H-2-Kd	10	WB	3360.86	PD Mascot	HG	5000000	HG_2a	256_265	HSPB1-associated protein 1 OS=Mus musculus OX=10090 GN=Hspbap1 PE=1 SV=2	2
Q8BVE3	(TG)∖(HG)	(TG)∖(Control)	TFINLMTHI	H-2-Kd	9	SB	69.76	PD Mascot	TG	6500000	TG_1b	75_83	V-type proton ATPase subunit H OS=Mus musculus OX=10090 GN=Atp6v1h PE=1 SV=1	0.07
Q8BVN9	(TG)∖(HG)	(TG)∖(Control)	GYYPSGVKI	H-2-Kd	9	SB	114.43	PD Mascot	TG	4300000	TG_1c	372_380	Protein maelstrom homolog OS=Mus musculus OX=10090 GN=Mael PE=1 SV=1	0.12
Q8CFD4	(TG)∖(HG)	(TG)∖(Control)	VYLPLTSHI	H-2-Kd	9	SB	19.28	PD Mascot	TG	4700000	TG_1a	399_407	Sorting nexin-8 OS=Mus musculus OX=10090 GN=Snx8 PE=1 SV=1	0.01
Q8CGN4	(TG)∖(HG)	(TG)∖(Control)	FYRQVSTSL	H-2-Kd	9	SB	15.11	PD Mascot	TG	3400000	TG_1a	1700_1708	BCL-6 corepressor OS=Mus musculus OX=10090 GN=Bcor PE=1 SV=2	0.01
Q8CJ27	(TG)∖(HG)	(TG)∖(Control)	SYNPLWLRI	H-2-Kd	9	SB	131.03	Maxquant	TG	2143300	TG_1c	785_793	Abnormal spindle-like microcephaly-associated protein homolog OS=Mus musculus OX=10090 GN=Aspm PE=1 SV=2	0.12
Q8K0R6	(TG)∖(HG)	(TG)∖(Control)	VYNRTQGLL	H-2-Kd	9	WB	1051.39	PD Mascot	TG	4700000	TG_1b	303_311	Glycolipid transfer protein domain-containing protein 2 OS=Mus musculus OX=10090 GN=Gltpd2 PE=1 SV=1	0.8
Q8R2R5	(TG)∖(HG)	(TG)∖(Control)	SYWAVVREL	H-2-Kd	9	SB	52.3	PD Mascot	TG	2000000	TG_1a	144_152	Leucine-rich repeat-containing protein 61 OS=Mus musculus OX=10090 GN=Lrrc61 PE=2 SV=1	0.05
Q8R5K4	(TG)∖(HG)	(TG)∖(Control)	QFWGTRSEL	H-2-Kd	9	WB	1458.25	PD Mascot	TG	8800000	TG_1a	586_594	Nucleolar protein 6 OS=Mus musculus OX=10090 GN=Nol6 PE=2 SV=2	1
Q8VC70	(TG)∖(HG)	(TG)∖(Control)	AYISQYPAV	H-2-Kd	9	SB	171.37	PD Mascot	TG	8800000	TG_1a	340_348	RNA-binding motif, single-stranded-interacting protein 2 OS=Mus musculus OX=10090 GN=Rbms2 PE=1 SV=1	0.17
Q8VE18	HG∩TG	(TG)∖(Control)	IYRIFRKSRVL	H-2-Kd	11	WB	2547.83	PD Sequest	TG	4700000	TG_1a	307_317	Protein SMG8 OS=Mus musculus OX=10090 GN=Smg8 PE=1 SV=1	1.5
Q8VE18	HG∩TG	(HG)∖(Control)	IYRIFRKSRVL	H-2-Kd	11	WB	2547.83	PD Sequest	HG	650000	HG_1b	307_317	Protein SMG8 OS=Mus musculus OX=10090 GN=Smg8 PE=1 SV=1	1.5
Q8VI59	(TG)∖(HG)	(TG)∖(Control)	LHFASSLLL	H-2-Kd	9	WB	2767.6	Maxquant	TG	6972200	TG_1c	632_640	Pecanex-like protein 3 OS=Mus musculus OX=10090 GN=Pcnx3 PE=1 SV=2	1.7
Q91V04	(TG)∖(HG)	(TG)∖(Control)	AYLLNLNHL	H-2-Kd	9	SB	137.47	Maxquant	TG	3094300	TG_1a	209_217	Translocating chain-associated membrane protein 1 OS=Mus musculus OX=10090 GN=Tram1 PE=1 SV=3	0.12
Q91ZU6	(TG)∖(HG)	(TG)∖(Control)	QYQSLLRSL	H-2-Kd	9	SB	48.63	PD Sequest	TG	3800000	TG_1b	4670_4678	Dystonin OS=Mus musculus OX=10090 GN=Dst PE=1 SV=2	0.04
Q920I9	(TG)∖(HG)	(TG)∖(Control)	LFQQVKETI	H-2-Kd	9	SB	125.71	Maxquant	TG	3183700	TG_1c	741_749	WD repeat-containing protein 7 OS=Mus musculus OX=10090 GN=Wdr7 PE=1 SV=3	0.12
Q920N7	HG∩TG	(TG)∖(Control)	SYLPTAERL	H-2-Kd	9	SB	30.9	PD Mascot	TG	6400000	TG_1b	291_299	Synaptotagmin-12 OS=Mus musculus OX=10090 GN=Syt12 PE=1 SV=1	0.02
Q920N7	HG∩TG	(HG)∖(Control)	SYLPTAERL	H-2-Kd	9	SB	30.9	PD Mascot	HG	1700000	HG_2a	291_299	Synaptotagmin-12 OS=Mus musculus OX=10090 GN=Syt12 PE=1 SV=1	0.02
Q923B0	HG∩TG	(TG)∖(Control)	LYLPGKGHCV	H-2-Kd	10	WB	1018.47	PD Mascot	TG	15000000	TG_1a	53_62	Gamma-glutamylaminecyclotransferase OS=Mus musculus OX=10090 GN=Ggact PE=1 SV=1	0.8
Q923B0	HG∩TG	(HG)∖(Control)	LYLPGKGHCV	H-2-Kd	10	WB	1018.47	PD Mascot	HG	3600000	HG_2a	53_62	Gamma-glutamylaminecyclotransferase OS=Mus musculus OX=10090 GN=Ggact PE=1 SV=1	0.8
Q99JB2	HG∩TG	(HG)∖(Control)	QYVSAFSKL	H-2-Kd	9	SB	98.79	PD Sequest	HG	2400000	HG_2c	280_288	Stomatin-like protein 2, mitochondrial OS=Mus musculus OX=10090 GN=Stoml2 PE=1 SV=1	0.1
Q99JB2	HG∩TG	(TG)∖(Control)	QYVSAFSKL	H-2-Kd	9	SB	98.79	PD Sequest	TG	7300000	TG_1b	280_288	Stomatin-like protein 2, mitochondrial OS=Mus musculus OX=10090 GN=Stoml2 PE=1 SV=1	0.1
Q99ME2	HG∩TG	(TG)∖(Control)	SYLESKGLL	H-2-Kd	9	SB	47.13	PD Mascot	TG	23000000	TG_1c	215_223	WD repeat-containing protein 6 OS=Mus musculus OX=10090 GN=Wdr6 PE=1 SV=1	0.04
Q99ME2	HG∩TG	(HG)∖(Control)	SYLESKGLL	H-2-Kd	9	SB	47.13	PD Mascot	HG	6800000	HG_2a	215_223	WD repeat-containing protein 6 OS=Mus musculus OX=10090 GN=Wdr6 PE=1 SV=1	0.04
Q99MJ9	HG∩TG	(HG)∖(Control)	SYQSQINQI	H-2-Kd	9	SB	12.58	Maxquant	HG	454160	HG_2c	244_252	ATP-dependent RNA helicase DDX50 OS=Mus musculus OX=10090 GN=Ddx50 PE=2 SV=1	0.01
Q99MJ9	HG∩TG	(TG)∖(Control)	SYQSQINQI	H-2-Kd	9	SB	12.58	Maxquant	TG	432890	TG_1b	244_252	ATP-dependent RNA helicase DDX50 OS=Mus musculus OX=10090 GN=Ddx50 PE=2 SV=1	0.01
Q9CQ61	(HG)∖(TG)	(HG)∖(Control)	YLFTSPQRV	H-2-Kd	9	WB	3456.71	PD Mascot	HG	1500000	HG_2a	54_62	Protein unc-50 homolog OS=Mus musculus OX=10090 GN=Unc50 PE=2 SV=1	2
Q9CQF9	(TG)∖(HG)	(TG)∖(Control)	LYERLKTEL	H-2-Kd	9	SB	37.38	PD Mascot	TG	20000000	TG_1c	496_504	Prenylcysteine oxidase OS=Mus musculus OX=10090 GN=Pcyox1 PE=1 SV=1	0.03
Q9CQX0	HG∩TG	(HG)∖(Control)	SYLESLLGK	H-2-Kd	9	WB	2556.69	PD Mascot	HG	6800000	HG_2a	58_66	Ubiquitin thioesterase OTUB2 OS=Mus musculus OX=10090 GN=Otub2 PE=1 SV=1	1.6
Q9CQX0	HG∩TG	(TG)∖(Control)	SYLESLLGK	H-2-Kd	9	WB	2556.69	Maxquant	TG	9976600	TG_1a	58_66	Ubiquitin thioesterase OTUB2 OS=Mus musculus OX=10090 GN=Otub2 PE=1 SV=1	1.6
Q9CYC3	(TG)∖(HG)	(TG)∖(Control)	YYDMRWSCEHL	H-2-Kd	11	WB	787.15	PD Sequest	TG	3500000	TG_1b	309_319	Transmembrane protein 39A OS=Mus musculus OX=10090 GN=Tmem39a PE=2 SV=1	0.6
Q9CZW4	(TG)∖(HG)	(TG)∖(Control)	GYLPLAHVL	H-2-Kd	9	SB	64.26	PD Mascot	TG	26000000	TG_1a	325_333	Long-chain-fatty-acid--CoA ligase 3 OS=Mus musculus OX=10090 GN=Acsl3 PE=1 SV=2	0.06
Q9D0K0	(TG)∖(HG)	(TG)∖(Control)	QYHDILHAL	H-2-Kd	9	SB	231.02	PD Mascot	TG	5200000	TG_1c	83_91	TBC1 domain family member 7 OS=Mus musculus OX=10090 GN=Tbc1d7 PE=1 SV=1	0.25
Q9D1P2	(TG)∖(HG)	(TG)∖(Control)	KYWKGQHVI	H-2-Kd	9	SB	41.42	PD Mascot	TG	3200000	TG_1c	406_414	Histone acetyltransferase KAT8 OS=Mus musculus OX=10090 GN=Kat8 PE=1 SV=1	0.03
Q9D4H8	(TG)∖(HG)	(TG)∖(Control)	TWNKLLTTI	H-2-Kd	9	SB	305.29	Maxquant	TG	17012000	TG_1c	12_20	Cullin-2 OS=Mus musculus OX=10090 GN=Cul2 PE=1 SV=2	0.3
Q9DB28	(TG)∖(HG)	(TG)∖(Control)	RYLNAYTGV	H-2-Kd	9	SB	48.15	PD Sequest	TG	2900000	TG_1a	55_63	Ribonuclease P/MRP protein subunit POP5 OS=Mus musculus OX=10090 GN=Pop5 PE=1 SV=1	0.04
Q9DBT3	(TG)∖(HG)	(TG)∖(Control)	RYAALRELI	H-2-Kd	9	SB	48.76	PD Mascot	TG	13000000	TG_1b	157_165	Coiled-coil domain-containing protein 97 OS=Mus musculus OX=10090 GN=Ccdc97 PE=1 SV=1	0.04
Q9DBY1	(TG)∖(HG)	(TG)∖(Control)	EYAILMTMVLT	H-2-Kd	11	WB	2216.59	PD Mascot	TG	6300000	TG_1c	176_186	E3 ubiquitin-protein ligase synoviolin OS=Mus musculus OX=10090 GN=Syvn1 PE=1 SV=3	1.4
Q9EP89	(HG)∖(TG)	(HG)∖(Control)	FHDLDMLTTVQ	H-2-Kd	11	WB	979.28	PD Mascot	HG	2700000	HG_1c	354_364	Serine beta-lactamase-like protein LACTB, mitochondrial OS=Mus musculus OX=10090 GN=Lactb PE=1 SV=1	0.7
Q9ES28	HG∩TG	(HG)∖(Control)	YYNVVLQNIL	H-2-Kd	10	WB	745.55	PD Mascot	HG	1500000	HG_2b	249_258	Rho guanine nucleotide exchange factor 7 OS=Mus musculus OX=10090 GN=Arhgef7 PE=1 SV=2	0.6
Q9ES28	HG∩TG	(TG)∖(Control)	YYNVVLQNIL	H-2-Kd	10	WB	745.55	PD Mascot	TG	2900000	TG_1c	249_258	Rho guanine nucleotide exchange factor 7 OS=Mus musculus OX=10090 GN=Arhgef7 PE=1 SV=2	0.6
Q9ESE1	(TG)∖(HG)	(TG)∖(Control)	SYNLTVREL	H-2-Kd	9	SB	177.53	PD Mascot	TG	1800000	TG_2c	160_168	Lipopolysaccharide-responsive and beige-like anchor protein OS=Mus musculus OX=10090 GN=Lrba PE=1 SV=1	0.17
Q9JLR1	HG∩TG	(HG)∖(Control)	MIITIGQAI	H-2-Kd	9	WB	2479.52	PD Mascot	HG	73000000	HG_1a	120_128	Protein transport protein Sec61 subunit alpha isoform 2 OS=Mus musculus OX=10090 GN=Sec61a2 PE=2 SV=3	1.5
Q9JLR1	HG∩TG	(TG)∖(Control)	MIITIGQAI	H-2-Kd	9	WB	2479.52	PD Mascot	TG	2900000	TG_2b	120_128	Protein transport protein Sec61 subunit alpha isoform 2 OS=Mus musculus OX=10090 GN=Sec61a2 PE=2 SV=3	1.5
Q9JLV5	(TG)∖(HG)	(TG)∖(Control)	KYVNSIWDL	H-2-Kd	9	SB	60.7	Maxquant	TG	5790600	TG_1b	27_35	Cullin-3 OS=Mus musculus OX=10090 GN=Cul3 PE=1 SV=1	0.06
Q9QZB7	(TG)∖(HG)	(TG)∖(Control)	KYFEVPSVL	H-2-Kd	9	SB	27.72	Maxquant	TG	3938400	TG_1c	110_118	Actin-related protein 10 OS=Mus musculus OX=10090 GN=Actr10 PE=1 SV=2	0.02
Q9R155	(TG)∖(HG)	(TG)∖(Control)	KNYNGILSII	H-2-Kd	10	WB	692.39	PD Sequest	TG	18000000	TG_1c	244_253	Pendrin OS=Mus musculus OX=10090 GN=Slc26a4 PE=1 SV=1	0.6
Q9R210	(TG)∖(HG)	(TG)∖(Control)	SYLENPTSYHL	H-2-Kd	11	SB	135.96	Maxquant	TG	4399200	TG_1c	72_82	Transcription factor EB OS=Mus musculus OX=10090 GN=Tfeb PE=1 SV=2	0.12
Q9WU78	(TG)∖(HG)	(TG)∖(Control)	AFLHIKDTV	H-2-Kd	9	WB	912.64	Maxquant	TG	18462000	TG_1a	158_166	Programmed cell death 6-interacting protein OS=Mus musculus OX=10090 GN=Pdcd6ip PE=1 SV=3	0.7
Q9WVF9	(TG)∖(HG)	(TG)∖(Control)	AYLSSDRIS	H-2-Kd	9	WB	1783.27	PD Mascot	TG	8800000	TG_1a	181_189	C-type lectin domain family 2 member I OS=Mus musculus OX=10090 GN=Clec2i PE=1 SV=1	1.2
Q9WVG6	(TG)∖(HG)	(TG)∖(Control)	WYQPSFHGV	H-2-Kd	9	SB	58.38	PD Sequest	TG	9100000	TG_1a	313_321	Histone-arginine methyltransferase CARM1 OS=Mus musculus OX=10090 GN=Carm1 PE=1 SV=2	0.05
Q9Z0G0	(TG)∖(HG)	(TG)∖(Control)	SYMGIRDTEL	H-2-Kd	10	SB	53.09	PD Mascot	TG	3000000	TG_1c	273_282	PDZ domain-containing protein GIPC1 OS=Mus musculus OX=10090 GN=Gipc1 PE=1 SV=1	0.05
Q9Z1N5	(TG)∖(HG)	(TG)∖(Control)	SYVSIHSSGF	H-2-Kd	10	WB	781.12	PD Mascot	TG	2500000	TG_1c	37_46	Spliceosome RNA helicase Ddx39b OS=Mus musculus OX=10090 GN=Ddx39b PE=1 SV=1	0.6
