# Supplementary material for: Immunopeptidome mining reveals a novel ERS-induced target in T1D
Source: Research Square preprint supplement (doi:10.21203/rs.3.rs-2997556/v1), 2023-06-09
Supplement: Supplementary file 3 [file e906aa2bfe96137da4f5c600.xlsx]

## Sheet: All
Sequence	Length	HLA	BindLevel	Affinity(nM)	Tool	variable	value	Sample	Protein accession	Position	Protein description	Gene name
AAKASVPTI	9	H-2-Db	WB	5917.34	Maxquant	HG	3325200	HG_1a	P26039	1002_1010	Talin-1 OS=Mus musculus OX=10090 GN=Tln1 PE=1 SV=2	Tln1
AAKASVPTI	9	H-2-Db	WB	5917.34	Maxquant	Control	5079900	Control_1_1c	P26039	1002_1010	Talin-1 OS=Mus musculus OX=10090 GN=Tln1 PE=1 SV=2	Tln1
AAKASVPTI	9	H-2-Db	WB	5917.34	Maxquant	TG	2338400	TG_2a	P26039	1002_1010	Talin-1 OS=Mus musculus OX=10090 GN=Tln1 PE=1 SV=2	Tln1
AAKASVPTI	9	H-2-Db	WB	5917.34	Maxquant	TG	2698000	TG_2b	P26039	1002_1010	Talin-1 OS=Mus musculus OX=10090 GN=Tln1 PE=1 SV=2	Tln1
AAKASVPTI	9	H-2-Db	WB	5917.34	Maxquant	TG	3229200	TG_2c	P26039	1002_1010	Talin-1 OS=Mus musculus OX=10090 GN=Tln1 PE=1 SV=2	Tln1
AAKASVPTI	9	H-2-Db	WB	5917.34	Maxquant	Control	1951200	Control_1_2c	P26039	1002_1010	Talin-1 OS=Mus musculus OX=10090 GN=Tln1 PE=1 SV=2	Tln1
AAKASVPTI	9	H-2-Db	WB	5917.34	Maxquant	TG	2555900	TG_1a	P26039	1002_1010	Talin-1 OS=Mus musculus OX=10090 GN=Tln1 PE=1 SV=2	Tln1
AAKASVPTI	9	H-2-Db	WB	5917.34	Maxquant	HG	3257400	HG_1b	P26039	1002_1010	Talin-1 OS=Mus musculus OX=10090 GN=Tln1 PE=1 SV=2	Tln1
AAKASVPTI	9	H-2-Db	WB	5917.34	Maxquant	Control	1852200	Control_1_2a	P26039	1002_1010	Talin-1 OS=Mus musculus OX=10090 GN=Tln1 PE=1 SV=2	Tln1
AAKASVPTI	9	H-2-Db	WB	5917.34	Maxquant	TG	3156000	TG_1c	P26039	1002_1010	Talin-1 OS=Mus musculus OX=10090 GN=Tln1 PE=1 SV=2	Tln1
AAKASVPTI	9	H-2-Db	WB	5917.34	Maxquant	TG	3151000	TG_1b	P26039	1002_1010	Talin-1 OS=Mus musculus OX=10090 GN=Tln1 PE=1 SV=2	Tln1
AAKASVPTI	9	H-2-Db	WB	5917.34	Maxquant	HG	5228500	HG_1c	P26039	1002_1010	Talin-1 OS=Mus musculus OX=10090 GN=Tln1 PE=1 SV=2	Tln1
AAKASVPTI	9	H-2-Db	WB	5917.34	Maxquant	HG	4274600	HG_2c	P26039	1002_1010	Talin-1 OS=Mus musculus OX=10090 GN=Tln1 PE=1 SV=2	Tln1
AAKASVPTI	9	H-2-Db	WB	5917.34	Maxquant	HG	3068800	HG_2a	P26039	1002_1010	Talin-1 OS=Mus musculus OX=10090 GN=Tln1 PE=1 SV=2	Tln1
AAKASVPTI	9	H-2-Db	WB	5917.34	Maxquant	Control	5805000	Control_1_1a	P26039	1002_1010	Talin-1 OS=Mus musculus OX=10090 GN=Tln1 PE=1 SV=2	Tln1
AAKASVPTI	9	H-2-Db	WB	5917.34	Maxquant	HG	3139300	HG_2b	P26039	1002_1010	Talin-1 OS=Mus musculus OX=10090 GN=Tln1 PE=1 SV=2	Tln1
AFLHIKDTV	9	H-2-Kd	WB	912.64	Maxquant	TG	18462000	TG_1a	Q9WU78	158_166	Programmed cell death 6-interacting protein OS=Mus musculus OX=10090 GN=Pdcd6ip PE=1 SV=3	Pdcd6ip
AFYQVGMLYMT	11	H-2-Kd	WB	2117.68	PD Mascot	Control	2200000	Control_1_2b	Q3U481	271_281	Major facilitator superfamily domain-containing protein 12 OS=Mus musculus OX=10090 GN=Mfsd12 PE=1 SV=1	Mfsd12
AYAPAAATV	9	H-2-Kd	SB	31.59	Maxquant	Control	4477800	Control_1_1c	O88532	78_86	Zinc finger RNA-binding protein OS=Mus musculus OX=10090 GN=Zfr PE=1 SV=2	Zfr
AYAPAAATV	9	H-2-Kd	SB	31.59	Maxquant	HG	3699100	HG_1b	O88532	78_86	Zinc finger RNA-binding protein OS=Mus musculus OX=10090 GN=Zfr PE=1 SV=2	Zfr
AYAPAAATV	9	H-2-Kd	SB	31.59	Maxquant	TG	1333000	TG_1a	O88532	78_86	Zinc finger RNA-binding protein OS=Mus musculus OX=10090 GN=Zfr PE=1 SV=2	Zfr
AYAPAAATV	9	H-2-Kd	SB	31.59	Maxquant	Control	1535500	Control_1_2a	O88532	78_86	Zinc finger RNA-binding protein OS=Mus musculus OX=10090 GN=Zfr PE=1 SV=2	Zfr
AYAPAAATV	9	H-2-Kd	SB	31.59	Maxquant	HG	3899600	HG_1a	O88532	78_86	Zinc finger RNA-binding protein OS=Mus musculus OX=10090 GN=Zfr PE=1 SV=2	Zfr
AYAPAAATV	9	H-2-Kd	SB	31.59	Maxquant	Control	1629300	Control_1_2c	O88532	78_86	Zinc finger RNA-binding protein OS=Mus musculus OX=10090 GN=Zfr PE=1 SV=2	Zfr
AYAPAAATV	9	H-2-Kd	SB	31.59	Maxquant	Control	5168200	Control_1_1b	O88532	78_86	Zinc finger RNA-binding protein OS=Mus musculus OX=10090 GN=Zfr PE=1 SV=2	Zfr
AYAPAAATV	9	H-2-Kd	SB	31.59	Maxquant	HG	5337600	HG_1c	O88532	78_86	Zinc finger RNA-binding protein OS=Mus musculus OX=10090 GN=Zfr PE=1 SV=2	Zfr
AYAPAAATV	9	H-2-Kd	SB	31.59	Maxquant	Control	1728200	Control_1_2b	O88532	78_86	Zinc finger RNA-binding protein OS=Mus musculus OX=10090 GN=Zfr PE=1 SV=2	Zfr
AYAPAAATV	9	H-2-Kd	SB	31.59	Maxquant	HG	2704100	HG_2b	O88532	78_86	Zinc finger RNA-binding protein OS=Mus musculus OX=10090 GN=Zfr PE=1 SV=2	Zfr
AYAPAAATV	9	H-2-Kd	SB	31.59	Maxquant	TG	1253100	TG_1b	O88532	78_86	Zinc finger RNA-binding protein OS=Mus musculus OX=10090 GN=Zfr PE=1 SV=2	Zfr
AYAPAAATV	9	H-2-Kd	SB	31.59	Maxquant	HG	2079600	HG_2c	O88532	78_86	Zinc finger RNA-binding protein OS=Mus musculus OX=10090 GN=Zfr PE=1 SV=2	Zfr
AYAPAAATV	9	H-2-Kd	SB	31.59	Maxquant	Control	4357100	Control_1_1a	O88532	78_86	Zinc finger RNA-binding protein OS=Mus musculus OX=10090 GN=Zfr PE=1 SV=2	Zfr
AYAPAAATV	9	H-2-Kd	SB	31.59	Maxquant	HG	2545500	HG_2a	O88532	78_86	Zinc finger RNA-binding protein OS=Mus musculus OX=10090 GN=Zfr PE=1 SV=2	Zfr
AYAPAAATV	9	H-2-Kd	SB	31.59	Maxquant	TG	1282400	TG_1c	O88532	78_86	Zinc finger RNA-binding protein OS=Mus musculus OX=10090 GN=Zfr PE=1 SV=2	Zfr
AYAPAIHQI	9	H-2-Kd	SB	25.55	PD Mascot	TG	8700000	TG_1b	E9Q7E2	937_945	AT-rich interactive domain-containing protein 2 OS=Mus musculus OX=10090 GN=Arid2 PE=1 SV=1	Arid2
AYAPAIHQI	9	H-2-Kd	SB	25.55	Maxquant	TG	794580	TG_2b	E9Q7E2	937_945	AT-rich interactive domain-containing protein 2 OS=Mus musculus OX=10090 GN=Arid2 PE=1 SV=1	Arid2
AYAPAIHQI	9	H-2-Kd	SB	25.55	Maxquant	HG	2783700	HG_2a	E9Q7E2	937_945	AT-rich interactive domain-containing protein 2 OS=Mus musculus OX=10090 GN=Arid2 PE=1 SV=1	Arid2
AYAPAIHQI	9	H-2-Kd	SB	25.55	Maxquant	Control	2800500	Control_1_1c	E9Q7E2	937_945	AT-rich interactive domain-containing protein 2 OS=Mus musculus OX=10090 GN=Arid2 PE=1 SV=1	Arid2
AYAPAIHQI	9	H-2-Kd	SB	25.55	PD Mascot	TG	8500000	TG_1a	E9Q7E2	937_945	AT-rich interactive domain-containing protein 2 OS=Mus musculus OX=10090 GN=Arid2 PE=1 SV=1	Arid2
AYAPAIHQI	9	H-2-Kd	SB	25.55	Maxquant	HG	2918900	HG_2b	E9Q7E2	937_945	AT-rich interactive domain-containing protein 2 OS=Mus musculus OX=10090 GN=Arid2 PE=1 SV=1	Arid2
AYAPAIHQI	9	H-2-Kd	SB	25.55	Maxquant	Control	297020	Control_1_2a	E9Q7E2	937_945	AT-rich interactive domain-containing protein 2 OS=Mus musculus OX=10090 GN=Arid2 PE=1 SV=1	Arid2
AYAPAIHQI	9	H-2-Kd	SB	25.55	PD Mascot	HG	5100000	HG_2a	E9Q7E2	937_945	AT-rich interactive domain-containing protein 2 OS=Mus musculus OX=10090 GN=Arid2 PE=1 SV=1	Arid2
AYAPAIHQI	9	H-2-Kd	SB	25.55	Maxquant	Control	2910500	Control_1_1b	E9Q7E2	937_945	AT-rich interactive domain-containing protein 2 OS=Mus musculus OX=10090 GN=Arid2 PE=1 SV=1	Arid2
AYAPAIHQI	9	H-2-Kd	SB	25.55	Maxquant	Control	3132000	Control_1_1a	E9Q7E2	937_945	AT-rich interactive domain-containing protein 2 OS=Mus musculus OX=10090 GN=Arid2 PE=1 SV=1	Arid2
AYAPAIHQI	9	H-2-Kd	SB	25.55	Maxquant	TG	3425700	TG_1c	E9Q7E2	937_945	AT-rich interactive domain-containing protein 2 OS=Mus musculus OX=10090 GN=Arid2 PE=1 SV=1	Arid2
AYAPAIHQI	9	H-2-Kd	SB	25.55	Maxquant	TG	3897100	TG_1b	E9Q7E2	937_945	AT-rich interactive domain-containing protein 2 OS=Mus musculus OX=10090 GN=Arid2 PE=1 SV=1	Arid2
AYAPAIHQI	9	H-2-Kd	SB	25.55	Maxquant	HG	2465700	HG_2c	E9Q7E2	937_945	AT-rich interactive domain-containing protein 2 OS=Mus musculus OX=10090 GN=Arid2 PE=1 SV=1	Arid2
AYAPAIHQI	9	H-2-Kd	SB	25.55	Maxquant	TG	903220	TG_2a	E9Q7E2	937_945	AT-rich interactive domain-containing protein 2 OS=Mus musculus OX=10090 GN=Arid2 PE=1 SV=1	Arid2
AYAPAIHQI	9	H-2-Kd	SB	25.55	PD Mascot	HG	5100000	HG_2c	E9Q7E2	937_945	AT-rich interactive domain-containing protein 2 OS=Mus musculus OX=10090 GN=Arid2 PE=1 SV=1	Arid2
AYAPAIHQI	9	H-2-Kd	SB	25.55	PD Mascot	HG	5100000	HG_2b	E9Q7E2	937_945	AT-rich interactive domain-containing protein 2 OS=Mus musculus OX=10090 GN=Arid2 PE=1 SV=1	Arid2
AYAPAIHQI	9	H-2-Kd	SB	25.55	PD Mascot	TG	7200000	TG_1c	E9Q7E2	937_945	AT-rich interactive domain-containing protein 2 OS=Mus musculus OX=10090 GN=Arid2 PE=1 SV=1	Arid2
AYAPAIHQI	9	H-2-Kd	SB	25.55	Maxquant	TG	3924900	TG_1a	E9Q7E2	937_945	AT-rich interactive domain-containing protein 2 OS=Mus musculus OX=10090 GN=Arid2 PE=1 SV=1	Arid2
AYAPAIHQI	9	H-2-Kd	SB	25.55	Maxquant	TG	990710	TG_2c	E9Q7E2	937_945	AT-rich interactive domain-containing protein 2 OS=Mus musculus OX=10090 GN=Arid2 PE=1 SV=1	Arid2
AYAPSGNYV	9	H-2-Kd	SB	22.16	Maxquant	TG	15888000	TG_1b	P62874	103_111	Guanine nucleotide-binding protein G(I)/G(S)/G(T) subunit beta-1 OS=Mus musculus OX=10090 GN=Gnb1 PE=1 SV=3	Gnb1
AYAPSGNYV	9	H-2-Kd	SB	22.16	Maxquant	HG	7104400	HG_1a	P62874	103_111	Guanine nucleotide-binding protein G(I)/G(S)/G(T) subunit beta-1 OS=Mus musculus OX=10090 GN=Gnb1 PE=1 SV=3	Gnb1
AYAPSGNYV	9	H-2-Kd	SB	22.16	Maxquant	Control	20954000	Control_1_1c	P62874	103_111	Guanine nucleotide-binding protein G(I)/G(S)/G(T) subunit beta-1 OS=Mus musculus OX=10090 GN=Gnb1 PE=1 SV=3	Gnb1
AYAPSGNYV	9	H-2-Kd	SB	22.16	Maxquant	TG	2612600	TG_2b	P62874	103_111	Guanine nucleotide-binding protein G(I)/G(S)/G(T) subunit beta-1 OS=Mus musculus OX=10090 GN=Gnb1 PE=1 SV=3	Gnb1
AYAPSGNYV	9	H-2-Kd	SB	22.16	Maxquant	TG	12307000	TG_1a	P62874	103_111	Guanine nucleotide-binding protein G(I)/G(S)/G(T) subunit beta-1 OS=Mus musculus OX=10090 GN=Gnb1 PE=1 SV=3	Gnb1
AYAPSGNYV	9	H-2-Kd	SB	22.16	Maxquant	HG	14404000	HG_2c	P62874	103_111	Guanine nucleotide-binding protein G(I)/G(S)/G(T) subunit beta-1 OS=Mus musculus OX=10090 GN=Gnb1 PE=1 SV=3	Gnb1
AYAPSGNYV	9	H-2-Kd	SB	22.16	Maxquant	HG	12667000	HG_2b	P62874	103_111	Guanine nucleotide-binding protein G(I)/G(S)/G(T) subunit beta-1 OS=Mus musculus OX=10090 GN=Gnb1 PE=1 SV=3	Gnb1
AYAPSGNYV	9	H-2-Kd	SB	22.16	Maxquant	HG	12121000	HG_2a	P62874	103_111	Guanine nucleotide-binding protein G(I)/G(S)/G(T) subunit beta-1 OS=Mus musculus OX=10090 GN=Gnb1 PE=1 SV=3	Gnb1
AYAPSGNYV	9	H-2-Kd	SB	22.16	Maxquant	Control	21787000	Control_1_1a	P62874	103_111	Guanine nucleotide-binding protein G(I)/G(S)/G(T) subunit beta-1 OS=Mus musculus OX=10090 GN=Gnb1 PE=1 SV=3	Gnb1
AYAPSGNYV	9	H-2-Kd	SB	22.16	Maxquant	HG	6198700	HG_1c	P62874	103_111	Guanine nucleotide-binding protein G(I)/G(S)/G(T) subunit beta-1 OS=Mus musculus OX=10090 GN=Gnb1 PE=1 SV=3	Gnb1
AYAPSGNYV	9	H-2-Kd	SB	22.16	Maxquant	HG	10317000	HG_1b	P62874	103_111	Guanine nucleotide-binding protein G(I)/G(S)/G(T) subunit beta-1 OS=Mus musculus OX=10090 GN=Gnb1 PE=1 SV=3	Gnb1
AYAPSGNYV	9	H-2-Kd	SB	22.16	Maxquant	TG	2253800	TG_2a	P62874	103_111	Guanine nucleotide-binding protein G(I)/G(S)/G(T) subunit beta-1 OS=Mus musculus OX=10090 GN=Gnb1 PE=1 SV=3	Gnb1
AYAPSGNYV	9	H-2-Kd	SB	22.16	Maxquant	TG	12211000	TG_1c	P62874	103_111	Guanine nucleotide-binding protein G(I)/G(S)/G(T) subunit beta-1 OS=Mus musculus OX=10090 GN=Gnb1 PE=1 SV=3	Gnb1
AYAPSGNYV	9	H-2-Kd	SB	22.16	Maxquant	Control	17277000	Control_1_1b	P62874	103_111	Guanine nucleotide-binding protein G(I)/G(S)/G(T) subunit beta-1 OS=Mus musculus OX=10090 GN=Gnb1 PE=1 SV=3	Gnb1
AYGALRAMV	9	H-2-Kd	SB	288.1	PD Mascot	TG	6800000	TG_1a	P97372	197_205	Proteasome activator complex subunit 2 OS=Mus musculus OX=10090 GN=Psme2 PE=1 SV=4	Psme2
AYGALRAMV	9	H-2-Kd	SB	288.1	PD Mascot	HG	2700000	HG_2a	P97372	197_205	Proteasome activator complex subunit 2 OS=Mus musculus OX=10090 GN=Psme2 PE=1 SV=4	Psme2
AYGALRAMV	9	H-2-Kd	SB	288.1	PD Mascot	TG	5900000	TG_1c	P97372	197_205	Proteasome activator complex subunit 2 OS=Mus musculus OX=10090 GN=Psme2 PE=1 SV=4	Psme2
AYGALRAMV	9	H-2-Kd	SB	288.1	PD Mascot	Control	3700000	Control_1_1c	P97372	197_205	Proteasome activator complex subunit 2 OS=Mus musculus OX=10090 GN=Psme2 PE=1 SV=4	Psme2
AYGALRAMV	9	H-2-Kd	SB	288.1	PD Mascot	Control	3900000	Control_1_1a	P97372	197_205	Proteasome activator complex subunit 2 OS=Mus musculus OX=10090 GN=Psme2 PE=1 SV=4	Psme2
AYHGGHLTI	9	H-2-Kd	SB	43.64	PD Mascot	HG	2600000	HG_2b	Q9CPX7	10_18	28S ribosomal protein S16, mitochondrial OS=Mus musculus OX=10090 GN=Mrps16 PE=1 SV=1	Mrps16
AYHGGHLTI	9	H-2-Kd	SB	43.64	PD Mascot	HG	4700000	HG_2c	Q9CPX7	10_18	28S ribosomal protein S16, mitochondrial OS=Mus musculus OX=10090 GN=Mrps16 PE=1 SV=1	Mrps16
AYHGGHLTI	9	H-2-Kd	SB	43.64	Maxquant	TG	1879300	TG_2b	Q9CPX7	10_18	28S ribosomal protein S16, mitochondrial OS=Mus musculus OX=10090 GN=Mrps16 PE=1 SV=1	Mrps16
AYHGGHLTI	9	H-2-Kd	SB	43.64	Maxquant	HG	3801900	HG_2b	Q9CPX7	10_18	28S ribosomal protein S16, mitochondrial OS=Mus musculus OX=10090 GN=Mrps16 PE=1 SV=1	Mrps16
AYHGGHLTI	9	H-2-Kd	SB	43.64	Maxquant	Control	14723000	Control_1_1a	Q9CPX7	10_18	28S ribosomal protein S16, mitochondrial OS=Mus musculus OX=10090 GN=Mrps16 PE=1 SV=1	Mrps16
AYHGGHLTI	9	H-2-Kd	SB	43.64	Maxquant	TG	13240000	TG_1a	Q9CPX7	10_18	28S ribosomal protein S16, mitochondrial OS=Mus musculus OX=10090 GN=Mrps16 PE=1 SV=1	Mrps16
AYHGGHLTI	9	H-2-Kd	SB	43.64	Maxquant	HG	1879800	HG_1a	Q9CPX7	10_18	28S ribosomal protein S16, mitochondrial OS=Mus musculus OX=10090 GN=Mrps16 PE=1 SV=1	Mrps16
AYHGGHLTI	9	H-2-Kd	SB	43.64	Maxquant	Control	11024000	Control_1_1c	Q9CPX7	10_18	28S ribosomal protein S16, mitochondrial OS=Mus musculus OX=10090 GN=Mrps16 PE=1 SV=1	Mrps16
AYHGGHLTI	9	H-2-Kd	SB	43.64	PD Mascot	TG	3800000	TG_2b	Q9CPX7	10_18	28S ribosomal protein S16, mitochondrial OS=Mus musculus OX=10090 GN=Mrps16 PE=1 SV=1	Mrps16
AYHGGHLTI	9	H-2-Kd	SB	43.64	Maxquant	TG	10384000	TG_1b	Q9CPX7	10_18	28S ribosomal protein S16, mitochondrial OS=Mus musculus OX=10090 GN=Mrps16 PE=1 SV=1	Mrps16
AYHGGHLTI	9	H-2-Kd	SB	43.64	Maxquant	HG	3917500	HG_2c	Q9CPX7	10_18	28S ribosomal protein S16, mitochondrial OS=Mus musculus OX=10090 GN=Mrps16 PE=1 SV=1	Mrps16
AYHGGHLTI	9	H-2-Kd	SB	43.64	PD Mascot	TG	25000000	TG_1a	Q9CPX7	10_18	28S ribosomal protein S16, mitochondrial OS=Mus musculus OX=10090 GN=Mrps16 PE=1 SV=1	Mrps16
AYHGGHLTI	9	H-2-Kd	SB	43.64	PD Mascot	Control	24000000	Control_1_1c	Q9CPX7	10_18	28S ribosomal protein S16, mitochondrial OS=Mus musculus OX=10090 GN=Mrps16 PE=1 SV=1	Mrps16
AYHGGHLTI	9	H-2-Kd	SB	43.64	PD Mascot	TG	23000000	TG_1b	Q9CPX7	10_18	28S ribosomal protein S16, mitochondrial OS=Mus musculus OX=10090 GN=Mrps16 PE=1 SV=1	Mrps16
AYHGGHLTI	9	H-2-Kd	SB	43.64	PD Mascot	Control	14000000	Control_1_1b	Q9CPX7	10_18	28S ribosomal protein S16, mitochondrial OS=Mus musculus OX=10090 GN=Mrps16 PE=1 SV=1	Mrps16
AYHGGHLTI	9	H-2-Kd	SB	43.64	PD Mascot	HG	3600000	HG_1b	Q9CPX7	10_18	28S ribosomal protein S16, mitochondrial OS=Mus musculus OX=10090 GN=Mrps16 PE=1 SV=1	Mrps16
AYHGGHLTI	9	H-2-Kd	SB	43.64	Maxquant	Control	5647400	Control_1_1b	Q9CPX7	10_18	28S ribosomal protein S16, mitochondrial OS=Mus musculus OX=10090 GN=Mrps16 PE=1 SV=1	Mrps16
AYHGGHLTI	9	H-2-Kd	SB	43.64	Maxquant	TG	6614500	TG_1c	Q9CPX7	10_18	28S ribosomal protein S16, mitochondrial OS=Mus musculus OX=10090 GN=Mrps16 PE=1 SV=1	Mrps16
AYHGGHLTI	9	H-2-Kd	SB	43.64	PD Mascot	TG	2700000	TG_2a	Q9CPX7	10_18	28S ribosomal protein S16, mitochondrial OS=Mus musculus OX=10090 GN=Mrps16 PE=1 SV=1	Mrps16
AYHGGHLTI	9	H-2-Kd	SB	43.64	Maxquant	TG	3418700	TG_2c	Q9CPX7	10_18	28S ribosomal protein S16, mitochondrial OS=Mus musculus OX=10090 GN=Mrps16 PE=1 SV=1	Mrps16
AYHGGHLTI	9	H-2-Kd	SB	43.64	Maxquant	HG	2787000	HG_2a	Q9CPX7	10_18	28S ribosomal protein S16, mitochondrial OS=Mus musculus OX=10090 GN=Mrps16 PE=1 SV=1	Mrps16
AYHGGHLTI	9	H-2-Kd	SB	43.64	Maxquant	HG	2134900	HG_1b	Q9CPX7	10_18	28S ribosomal protein S16, mitochondrial OS=Mus musculus OX=10090 GN=Mrps16 PE=1 SV=1	Mrps16
AYHGGHLTI	9	H-2-Kd	SB	43.64	Maxquant	HG	2009000	HG_1c	Q9CPX7	10_18	28S ribosomal protein S16, mitochondrial OS=Mus musculus OX=10090 GN=Mrps16 PE=1 SV=1	Mrps16
AYISQYPAV	9	H-2-Kd	SB	171.37	PD Mascot	TG	8800000	TG_1a	Q8VC70	340_348	RNA-binding motif, single-stranded-interacting protein 2 OS=Mus musculus OX=10090 GN=Rbms2 PE=1 SV=1	Rbms2
AYITGKEDI	9	H-2-Kd	SB	19.36	PD Mascot	Control	2500000	Control_1_2a	Q60767	263_271	Lymphocyte antigen 75 OS=Mus musculus OX=10090 GN=Ly75 PE=1 SV=2	Ly75
AYITGKEDI	9	H-2-Kd	SB	19.36	PD Mascot	TG	1900000	TG_2c	Q60767	263_271	Lymphocyte antigen 75 OS=Mus musculus OX=10090 GN=Ly75 PE=1 SV=2	Ly75
AYLAEQSRL	9	H-2-Kd	SB	278.39	Maxquant	HG	4148000	HG_1c	P70206	1830_1838	Plexin-A1 OS=Mus musculus OX=10090 GN=Plxna1 PE=1 SV=1	Plxna1
AYLAEQSRL	9	H-2-Kd	SB	278.39	Maxquant	HG	2759000	HG_2c	P70206	1830_1838	Plexin-A1 OS=Mus musculus OX=10090 GN=Plxna1 PE=1 SV=1	Plxna1
AYLAEQSRL	9	H-2-Kd	SB	278.39	Maxquant	HG	3725400	HG_1b	P70206	1830_1838	Plexin-A1 OS=Mus musculus OX=10090 GN=Plxna1 PE=1 SV=1	Plxna1
AYLAEQSRL	9	H-2-Kd	SB	278.39	Maxquant	TG	2847000	TG_2b	P70206	1830_1838	Plexin-A1 OS=Mus musculus OX=10090 GN=Plxna1 PE=1 SV=1	Plxna1
AYLAEQSRL	9	H-2-Kd	SB	278.39	Maxquant	TG	4397900	TG_1a	P70206	1830_1838	Plexin-A1 OS=Mus musculus OX=10090 GN=Plxna1 PE=1 SV=1	Plxna1
AYLAEQSRL	9	H-2-Kd	SB	278.39	Maxquant	TG	2949800	TG_2a	P70206	1830_1838	Plexin-A1 OS=Mus musculus OX=10090 GN=Plxna1 PE=1 SV=1	Plxna1
AYLAEQSRL	9	H-2-Kd	SB	278.39	Maxquant	HG	3349200	HG_1a	P70206	1830_1838	Plexin-A1 OS=Mus musculus OX=10090 GN=Plxna1 PE=1 SV=1	Plxna1
AYLAEQSRL	9	H-2-Kd	SB	278.39	Maxquant	HG	2498700	HG_2a	P70206	1830_1838	Plexin-A1 OS=Mus musculus OX=10090 GN=Plxna1 PE=1 SV=1	Plxna1
AYLAEQSRL	9	H-2-Kd	SB	278.39	Maxquant	TG	3800000	TG_1c	P70206	1830_1838	Plexin-A1 OS=Mus musculus OX=10090 GN=Plxna1 PE=1 SV=1	Plxna1
AYLAEQSRL	9	H-2-Kd	SB	278.39	Maxquant	Control	5931600	Control_1_1a	P70206	1830_1838	Plexin-A1 OS=Mus musculus OX=10090 GN=Plxna1 PE=1 SV=1	Plxna1
AYLAEQSRL	9	H-2-Kd	SB	278.39	Maxquant	HG	2811900	HG_2b	P70206	1830_1838	Plexin-A1 OS=Mus musculus OX=10090 GN=Plxna1 PE=1 SV=1	Plxna1
AYLAEQSRL	9	H-2-Kd	SB	278.39	Maxquant	Control	1427300	Control_1_2c	P70206	1830_1838	Plexin-A1 OS=Mus musculus OX=10090 GN=Plxna1 PE=1 SV=1	Plxna1
AYLAEQSRL	9	H-2-Kd	SB	278.39	Maxquant	Control	5947900	Control_1_1c	P70206	1830_1838	Plexin-A1 OS=Mus musculus OX=10090 GN=Plxna1 PE=1 SV=1	Plxna1
AYLAEQSRL	9	H-2-Kd	SB	278.39	Maxquant	Control	913880	Control_1_2a	P70206	1830_1838	Plexin-A1 OS=Mus musculus OX=10090 GN=Plxna1 PE=1 SV=1	Plxna1
AYLAEQSRL	9	H-2-Kd	SB	278.39	Maxquant	Control	1305400	Control_1_2b	P70206	1830_1838	Plexin-A1 OS=Mus musculus OX=10090 GN=Plxna1 PE=1 SV=1	Plxna1
AYLAEQSRL	9	H-2-Kd	SB	278.39	Maxquant	TG	331620	TG_2c	P70206	1830_1838	Plexin-A1 OS=Mus musculus OX=10090 GN=Plxna1 PE=1 SV=1	Plxna1
AYLAEQSRL	9	H-2-Kd	SB	278.39	Maxquant	Control	6502300	Control_1_1b	P70206	1830_1838	Plexin-A1 OS=Mus musculus OX=10090 GN=Plxna1 PE=1 SV=1	Plxna1
AYLLNLNHL	9	H-2-Kd	SB	137.47	Maxquant	TG	4725600	TG_1c	Q91V04	209_217	Translocating chain-associated membrane protein 1 OS=Mus musculus OX=10090 GN=Tram1 PE=1 SV=3	Tram1
AYLLNLNHL	9	H-2-Db	WB	1728.99	Maxquant	TG	3094300	TG_1a	Q91V04	209_217	Translocating chain-associated membrane protein 1 OS=Mus musculus OX=10090 GN=Tram1 PE=1 SV=3	Tram1
AYLLNLNHL	9	H-2-Db	WB	1728.99	Maxquant	TG	4359200	TG_1b	Q91V04	209_217	Translocating chain-associated membrane protein 1 OS=Mus musculus OX=10090 GN=Tram1 PE=1 SV=3	Tram1
AYLLNLNHL	9	H-2-Kd	SB	137.47	Maxquant	TG	3094300	TG_1a	Q91V04	209_217	Translocating chain-associated membrane protein 1 OS=Mus musculus OX=10090 GN=Tram1 PE=1 SV=3	Tram1
AYLLNLNHL	9	H-2-Kd	SB	137.47	Maxquant	TG	4359200	TG_1b	Q91V04	209_217	Translocating chain-associated membrane protein 1 OS=Mus musculus OX=10090 GN=Tram1 PE=1 SV=3	Tram1
AYLLNLNHL	9	H-2-Db	WB	1728.99	Maxquant	TG	4725600	TG_1c	Q91V04	209_217	Translocating chain-associated membrane protein 1 OS=Mus musculus OX=10090 GN=Tram1 PE=1 SV=3	Tram1
AYLPGSYTS	9	H-2-Kd	SB	602.11	PD Mascot	TG	23000000	TG_2c	P43267	168_176	Protein SOX-15 OS=Mus musculus OX=10090 GN=Sox15 PE=1 SV=3	Sox15
AYLPGSYTS	9	H-2-Kd	SB	602.11	PD Mascot	Control	1500000	Control_1_2b	P43267	168_176	Protein SOX-15 OS=Mus musculus OX=10090 GN=Sox15 PE=1 SV=3	Sox15
AYLPGSYTS	9	H-2-Kd	SB	602.11	PD Mascot	TG	1800000	TG_1c	P43267	168_176	Protein SOX-15 OS=Mus musculus OX=10090 GN=Sox15 PE=1 SV=3	Sox15
AYLPGSYTS	9	H-2-Kd	SB	602.11	PD Mascot	HG	26000000	HG_2c	P43267	168_176	Protein SOX-15 OS=Mus musculus OX=10090 GN=Sox15 PE=1 SV=3	Sox15
AYLPQTSRL	9	H-2-Kd	SB	65.79	PD Sequest	HG	2900000	HG_1c	Q6NXY1	932_940	TBC1 domain family member 31 OS=Mus musculus OX=10090 GN=Tbc1d31 PE=1 SV=1	Tbc1d31
AYLPQTSRL	9	H-2-Kd	SB	65.79	PD Mascot	HG	2900000	HG_1c	Q6NXY1	932_940	TBC1 domain family member 31 OS=Mus musculus OX=10090 GN=Tbc1d31 PE=1 SV=1	Tbc1d31
AYLPQTSRL	9	H-2-Kd	SB	65.79	Maxquant	TG	7773600	TG_2a	Q6NXY1	932_940	TBC1 domain family member 31 OS=Mus musculus OX=10090 GN=Tbc1d31 PE=1 SV=1	Tbc1d31
AYLPQTSRL	9	H-2-Kd	SB	65.79	PD Sequest	TG	18000000	TG_2b	Q6NXY1	932_940	TBC1 domain family member 31 OS=Mus musculus OX=10090 GN=Tbc1d31 PE=1 SV=1	Tbc1d31
AYLPQTSRL	9	H-2-Kd	SB	65.79	PD Mascot	Control	28000000	Control_1_1a	Q6NXY1	932_940	TBC1 domain family member 31 OS=Mus musculus OX=10090 GN=Tbc1d31 PE=1 SV=1	Tbc1d31
AYLPQTSRL	9	H-2-Kd	SB	65.79	Maxquant	HG	13961000	HG_2c	Q6NXY1	932_940	TBC1 domain family member 31 OS=Mus musculus OX=10090 GN=Tbc1d31 PE=1 SV=1	Tbc1d31
AYLPQTSRL	9	H-2-Kd	SB	65.79	Maxquant	Control	14907000	Control_1_1a	Q6NXY1	932_940	TBC1 domain family member 31 OS=Mus musculus OX=10090 GN=Tbc1d31 PE=1 SV=1	Tbc1d31
AYLPQTSRL	9	H-2-Kd	SB	65.79	PD Mascot	TG	18000000	TG_2a	Q6NXY1	932_940	TBC1 domain family member 31 OS=Mus musculus OX=10090 GN=Tbc1d31 PE=1 SV=1	Tbc1d31
AYLPQTSRL	9	H-2-Kd	SB	65.79	PD Sequest	HG	29000000	HG_2c	Q6NXY1	932_940	TBC1 domain family member 31 OS=Mus musculus OX=10090 GN=Tbc1d31 PE=1 SV=1	Tbc1d31
AYLPQTSRL	9	H-2-Kd	SB	65.79	PD Mascot	HG	27000000	HG_2b	Q6NXY1	932_940	TBC1 domain family member 31 OS=Mus musculus OX=10090 GN=Tbc1d31 PE=1 SV=1	Tbc1d31
AYLPQTSRL	9	H-2-Kd	SB	65.79	PD Mascot	HG	2600000	HG_1b	Q6NXY1	932_940	TBC1 domain family member 31 OS=Mus musculus OX=10090 GN=Tbc1d31 PE=1 SV=1	Tbc1d31
AYLPQTSRL	9	H-2-Kd	SB	65.79	Maxquant	HG	1522600	HG_1a	Q6NXY1	932_940	TBC1 domain family member 31 OS=Mus musculus OX=10090 GN=Tbc1d31 PE=1 SV=1	Tbc1d31
AYLPQTSRL	9	H-2-Kd	SB	65.79	PD Mascot	HG	29000000	HG_2c	Q6NXY1	932_940	TBC1 domain family member 31 OS=Mus musculus OX=10090 GN=Tbc1d31 PE=1 SV=1	Tbc1d31
AYLPQTSRL	9	H-2-Kd	SB	65.79	PD Mascot	TG	16000000	TG_2c	Q6NXY1	932_940	TBC1 domain family member 31 OS=Mus musculus OX=10090 GN=Tbc1d31 PE=1 SV=1	Tbc1d31
AYLPQTSRL	9	H-2-Kd	SB	65.79	Maxquant	HG	12612000	HG_2b	Q6NXY1	932_940	TBC1 domain family member 31 OS=Mus musculus OX=10090 GN=Tbc1d31 PE=1 SV=1	Tbc1d31
AYLPQTSRL	9	H-2-Kd	SB	65.79	Maxquant	Control	495950	Control_1_2a	Q6NXY1	932_940	TBC1 domain family member 31 OS=Mus musculus OX=10090 GN=Tbc1d31 PE=1 SV=1	Tbc1d31
AYLPQTSRL	9	H-2-Kd	SB	65.79	Maxquant	HG	1305800	HG_1b	Q6NXY1	932_940	TBC1 domain family member 31 OS=Mus musculus OX=10090 GN=Tbc1d31 PE=1 SV=1	Tbc1d31
AYLPQTSRL	9	H-2-Kd	SB	65.79	Maxquant	Control	14760000	Control_1_1c	Q6NXY1	932_940	TBC1 domain family member 31 OS=Mus musculus OX=10090 GN=Tbc1d31 PE=1 SV=1	Tbc1d31
AYLPQTSRL	9	H-2-Kd	SB	65.79	PD Sequest	TG	61000000	TG_1c	Q6NXY1	932_940	TBC1 domain family member 31 OS=Mus musculus OX=10090 GN=Tbc1d31 PE=1 SV=1	Tbc1d31
AYLPQTSRL	9	H-2-Kd	SB	65.79	Maxquant	TG	8005300	TG_2b	Q6NXY1	932_940	TBC1 domain family member 31 OS=Mus musculus OX=10090 GN=Tbc1d31 PE=1 SV=1	Tbc1d31
AYLPQTSRL	9	H-2-Kd	SB	65.79	PD Mascot	TG	61000000	TG_1c	Q6NXY1	932_940	TBC1 domain family member 31 OS=Mus musculus OX=10090 GN=Tbc1d31 PE=1 SV=1	Tbc1d31
AYLPQTSRL	9	H-2-Kd	SB	65.79	Maxquant	HG	10283000	HG_2a	Q6NXY1	932_940	TBC1 domain family member 31 OS=Mus musculus OX=10090 GN=Tbc1d31 PE=1 SV=1	Tbc1d31
AYLPQTSRL	9	H-2-Kd	SB	65.79	PD Sequest	HG	27000000	HG_2b	Q6NXY1	932_940	TBC1 domain family member 31 OS=Mus musculus OX=10090 GN=Tbc1d31 PE=1 SV=1	Tbc1d31
AYLPQTSRL	9	H-2-Kd	SB	65.79	PD Sequest	HG	2500000	HG_1a	Q6NXY1	932_940	TBC1 domain family member 31 OS=Mus musculus OX=10090 GN=Tbc1d31 PE=1 SV=1	Tbc1d31
AYLPQTSRL	9	H-2-Kd	SB	65.79	PD Mascot	HG	23000000	HG_2a	Q6NXY1	932_940	TBC1 domain family member 31 OS=Mus musculus OX=10090 GN=Tbc1d31 PE=1 SV=1	Tbc1d31
AYLPQTSRL	9	H-2-Kd	SB	65.79	PD Sequest	Control	28000000	Control_1_1a	Q6NXY1	932_940	TBC1 domain family member 31 OS=Mus musculus OX=10090 GN=Tbc1d31 PE=1 SV=1	Tbc1d31
AYLPQTSRL	9	H-2-Kd	SB	65.79	Maxquant	TG	33154000	TG_1a	Q6NXY1	932_940	TBC1 domain family member 31 OS=Mus musculus OX=10090 GN=Tbc1d31 PE=1 SV=1	Tbc1d31
AYLPQTSRL	9	H-2-Kd	SB	65.79	PD Sequest	TG	16000000	TG_2c	Q6NXY1	932_940	TBC1 domain family member 31 OS=Mus musculus OX=10090 GN=Tbc1d31 PE=1 SV=1	Tbc1d31
AYLPQTSRL	9	H-2-Kd	SB	65.79	PD Mascot	Control	29000000	Control_1_1b	Q6NXY1	932_940	TBC1 domain family member 31 OS=Mus musculus OX=10090 GN=Tbc1d31 PE=1 SV=1	Tbc1d31
AYLPQTSRL	9	H-2-Kd	SB	65.79	PD Sequest	HG	23000000	HG_2a	Q6NXY1	932_940	TBC1 domain family member 31 OS=Mus musculus OX=10090 GN=Tbc1d31 PE=1 SV=1	Tbc1d31
AYLPQTSRL	9	H-2-Kd	SB	65.79	Maxquant	TG	7281400	TG_2c	Q6NXY1	932_940	TBC1 domain family member 31 OS=Mus musculus OX=10090 GN=Tbc1d31 PE=1 SV=1	Tbc1d31
AYLPQTSRL	9	H-2-Kd	SB	65.79	PD Mascot	TG	18000000	TG_2b	Q6NXY1	932_940	TBC1 domain family member 31 OS=Mus musculus OX=10090 GN=Tbc1d31 PE=1 SV=1	Tbc1d31
AYLPQTSRL	9	H-2-Kd	SB	65.79	PD Sequest	TG	60000000	TG_1b	Q6NXY1	932_940	TBC1 domain family member 31 OS=Mus musculus OX=10090 GN=Tbc1d31 PE=1 SV=1	Tbc1d31
AYLPQTSRL	9	H-2-Kd	SB	65.79	Maxquant	Control	873040	Control_1_2c	Q6NXY1	932_940	TBC1 domain family member 31 OS=Mus musculus OX=10090 GN=Tbc1d31 PE=1 SV=1	Tbc1d31
AYLPQTSRL	9	H-2-Kd	SB	65.79	Maxquant	TG	25331000	TG_1b	Q6NXY1	932_940	TBC1 domain family member 31 OS=Mus musculus OX=10090 GN=Tbc1d31 PE=1 SV=1	Tbc1d31
AYLPQTSRL	9	H-2-Kd	SB	65.79	Maxquant	HG	1948200	HG_1c	Q6NXY1	932_940	TBC1 domain family member 31 OS=Mus musculus OX=10090 GN=Tbc1d31 PE=1 SV=1	Tbc1d31
AYLPQTSRL	9	H-2-Kd	SB	65.79	PD Mascot	HG	2500000	HG_1a	Q6NXY1	932_940	TBC1 domain family member 31 OS=Mus musculus OX=10090 GN=Tbc1d31 PE=1 SV=1	Tbc1d31
AYLPQTSRL	9	H-2-Kd	SB	65.79	PD Mascot	TG	64000000	TG_1a	Q6NXY1	932_940	TBC1 domain family member 31 OS=Mus musculus OX=10090 GN=Tbc1d31 PE=1 SV=1	Tbc1d31
AYLPQTSRL	9	H-2-Kd	SB	65.79	PD Sequest	Control	29000000	Control_1_1b	Q6NXY1	932_940	TBC1 domain family member 31 OS=Mus musculus OX=10090 GN=Tbc1d31 PE=1 SV=1	Tbc1d31
AYLPQTSRL	9	H-2-Kd	SB	65.79	PD Mascot	TG	60000000	TG_1b	Q6NXY1	932_940	TBC1 domain family member 31 OS=Mus musculus OX=10090 GN=Tbc1d31 PE=1 SV=1	Tbc1d31
AYLPQTSRL	9	H-2-Kd	SB	65.79	Maxquant	TG	25242000	TG_1c	Q6NXY1	932_940	TBC1 domain family member 31 OS=Mus musculus OX=10090 GN=Tbc1d31 PE=1 SV=1	Tbc1d31
AYLPQTSRL	9	H-2-Kd	SB	65.79	PD Sequest	Control	29000000	Control_1_1c	Q6NXY1	932_940	TBC1 domain family member 31 OS=Mus musculus OX=10090 GN=Tbc1d31 PE=1 SV=1	Tbc1d31
AYLPQTSRL	9	H-2-Kd	SB	65.79	PD Sequest	TG	64000000	TG_1a	Q6NXY1	932_940	TBC1 domain family member 31 OS=Mus musculus OX=10090 GN=Tbc1d31 PE=1 SV=1	Tbc1d31
AYLPQTSRL	9	H-2-Kd	SB	65.79	Maxquant	Control	14405000	Control_1_1b	Q6NXY1	932_940	TBC1 domain family member 31 OS=Mus musculus OX=10090 GN=Tbc1d31 PE=1 SV=1	Tbc1d31
AYLPQTSRL	9	H-2-Kd	SB	65.79	PD Sequest	TG	18000000	TG_2a	Q6NXY1	932_940	TBC1 domain family member 31 OS=Mus musculus OX=10090 GN=Tbc1d31 PE=1 SV=1	Tbc1d31
AYLPQTSRL	9	H-2-Kd	SB	65.79	PD Sequest	HG	2600000	HG_1b	Q6NXY1	932_940	TBC1 domain family member 31 OS=Mus musculus OX=10090 GN=Tbc1d31 PE=1 SV=1	Tbc1d31
AYLPQTSRL	9	H-2-Kd	SB	65.79	Maxquant	Control	485890	Control_1_2b	Q6NXY1	932_940	TBC1 domain family member 31 OS=Mus musculus OX=10090 GN=Tbc1d31 PE=1 SV=1	Tbc1d31
AYLPQTSRL	9	H-2-Kd	SB	65.79	PD Mascot	Control	29000000	Control_1_1c	Q6NXY1	932_940	TBC1 domain family member 31 OS=Mus musculus OX=10090 GN=Tbc1d31 PE=1 SV=1	Tbc1d31
AYLSSDRIS	9	H-2-Kd	WB	1783.27	PD Mascot	TG	8800000	TG_1a	Q9WVF9	181_189	C-type lectin domain family 2 member I OS=Mus musculus OX=10090 GN=Clec2i PE=1 SV=1	Clec2i
AYLSSRDSL	9	H-2-Kd	SB	16.39	PD Mascot	TG	8800000	TG_1a	Q810P3	196_204	Cyclin-dependent kinase inhibitor 3 OS=Mus musculus OX=10090 GN=Cdkn3 PE=2 SV=1	Cdkn3
AYNNLKGNL	9	H-2-Kd	SB	156.56	Maxquant	Control	1063400	Control_1_2a	Q9Z1G3	141_149	V-type proton ATPase subunit C 1 OS=Mus musculus OX=10090 GN=Atp6v1c1 PE=1 SV=4	Atp6v1c1
AYNNLKGNL	9	H-2-Kd	SB	156.56	Maxquant	HG	2937300	HG_1b	Q9Z1G3	141_149	V-type proton ATPase subunit C 1 OS=Mus musculus OX=10090 GN=Atp6v1c1 PE=1 SV=4	Atp6v1c1
AYNNLKGNL	9	H-2-Kd	SB	156.56	Maxquant	HG	4269900	HG_2c	Q9Z1G3	141_149	V-type proton ATPase subunit C 1 OS=Mus musculus OX=10090 GN=Atp6v1c1 PE=1 SV=4	Atp6v1c1
AYNNLKGNL	9	H-2-Kd	SB	156.56	Maxquant	Control	7994800	Control_1_1a	Q9Z1G3	141_149	V-type proton ATPase subunit C 1 OS=Mus musculus OX=10090 GN=Atp6v1c1 PE=1 SV=4	Atp6v1c1
AYNNLKGNL	9	H-2-Kd	SB	156.56	Maxquant	HG	4473500	HG_1a	Q9Z1G3	141_149	V-type proton ATPase subunit C 1 OS=Mus musculus OX=10090 GN=Atp6v1c1 PE=1 SV=4	Atp6v1c1
AYNNLKGNL	9	H-2-Kd	SB	156.56	Maxquant	TG	5147400	TG_1c	Q9Z1G3	141_149	V-type proton ATPase subunit C 1 OS=Mus musculus OX=10090 GN=Atp6v1c1 PE=1 SV=4	Atp6v1c1
AYNNLKGNL	9	H-2-Kd	SB	156.56	Maxquant	Control	7385000	Control_1_1c	Q9Z1G3	141_149	V-type proton ATPase subunit C 1 OS=Mus musculus OX=10090 GN=Atp6v1c1 PE=1 SV=4	Atp6v1c1
AYNNLKGNL	9	H-2-Kd	SB	156.56	Maxquant	TG	2796800	TG_2c	Q9Z1G3	141_149	V-type proton ATPase subunit C 1 OS=Mus musculus OX=10090 GN=Atp6v1c1 PE=1 SV=4	Atp6v1c1
AYNNLKGNL	9	H-2-Kd	SB	156.56	Maxquant	TG	5635800	TG_1b	Q9Z1G3	141_149	V-type proton ATPase subunit C 1 OS=Mus musculus OX=10090 GN=Atp6v1c1 PE=1 SV=4	Atp6v1c1
AYNNLKGNL	9	H-2-Kd	SB	156.56	Maxquant	TG	2430600	TG_2a	Q9Z1G3	141_149	V-type proton ATPase subunit C 1 OS=Mus musculus OX=10090 GN=Atp6v1c1 PE=1 SV=4	Atp6v1c1
AYNNLKGNL	9	H-2-Kd	SB	156.56	Maxquant	HG	4607000	HG_1c	Q9Z1G3	141_149	V-type proton ATPase subunit C 1 OS=Mus musculus OX=10090 GN=Atp6v1c1 PE=1 SV=4	Atp6v1c1
AYNNLKGNL	9	H-2-Kd	SB	156.56	Maxquant	Control	647110	Control_1_2b	Q9Z1G3	141_149	V-type proton ATPase subunit C 1 OS=Mus musculus OX=10090 GN=Atp6v1c1 PE=1 SV=4	Atp6v1c1
AYNNLKGNL	9	H-2-Kd	SB	156.56	Maxquant	Control	1096400	Control_1_2c	Q9Z1G3	141_149	V-type proton ATPase subunit C 1 OS=Mus musculus OX=10090 GN=Atp6v1c1 PE=1 SV=4	Atp6v1c1
AYNNLKGNL	9	H-2-Kd	SB	156.56	PD Mascot	TG	4200000	TG_2c	Q9Z1G3	141_149	V-type proton ATPase subunit C 1 OS=Mus musculus OX=10090 GN=Atp6v1c1 PE=1 SV=4	Atp6v1c1
AYNNLKGNL	9	H-2-Kd	SB	156.56	PD Mascot	TG	12000000	TG_1b	Q9Z1G3	141_149	V-type proton ATPase subunit C 1 OS=Mus musculus OX=10090 GN=Atp6v1c1 PE=1 SV=4	Atp6v1c1
AYNNLKGNL	9	H-2-Kd	SB	156.56	Maxquant	TG	5841800	TG_1a	Q9Z1G3	141_149	V-type proton ATPase subunit C 1 OS=Mus musculus OX=10090 GN=Atp6v1c1 PE=1 SV=4	Atp6v1c1
AYNNLKGNL	9	H-2-Kd	SB	156.56	Maxquant	TG	2950700	TG_2b	Q9Z1G3	141_149	V-type proton ATPase subunit C 1 OS=Mus musculus OX=10090 GN=Atp6v1c1 PE=1 SV=4	Atp6v1c1
AYNNLKGNL	9	H-2-Kd	SB	156.56	PD Mascot	HG	6600000	HG_2a	Q9Z1G3	141_149	V-type proton ATPase subunit C 1 OS=Mus musculus OX=10090 GN=Atp6v1c1 PE=1 SV=4	Atp6v1c1
AYNNLKGNL	9	H-2-Kd	SB	156.56	Maxquant	HG	3061900	HG_2a	Q9Z1G3	141_149	V-type proton ATPase subunit C 1 OS=Mus musculus OX=10090 GN=Atp6v1c1 PE=1 SV=4	Atp6v1c1
AYNNLKGNL	9	H-2-Kd	SB	156.56	Maxquant	Control	9920100	Control_1_1b	Q9Z1G3	141_149	V-type proton ATPase subunit C 1 OS=Mus musculus OX=10090 GN=Atp6v1c1 PE=1 SV=4	Atp6v1c1
AYNNLKGNL	9	H-2-Kd	SB	156.56	PD Mascot	HG	7800000	HG_1c	Q9Z1G3	141_149	V-type proton ATPase subunit C 1 OS=Mus musculus OX=10090 GN=Atp6v1c1 PE=1 SV=4	Atp6v1c1
AYNNLKGNL	9	H-2-Kd	SB	156.56	Maxquant	HG	3789600	HG_2b	Q9Z1G3	141_149	V-type proton ATPase subunit C 1 OS=Mus musculus OX=10090 GN=Atp6v1c1 PE=1 SV=4	Atp6v1c1
AYNPLPLTRL	10	H-2-Kd	WB	690.33	PD Mascot	TG	23000000	TG_1c	Q62388	1607_1616	Serine-protein kinase ATM OS=Mus musculus OX=10090 GN=Atm PE=1 SV=2	Atm
AYNPLPLTRL	10	H-2-Kd	WB	690.33	PD Sequest	TG	24000000	TG_1b	Q62388	1607_1616	Serine-protein kinase ATM OS=Mus musculus OX=10090 GN=Atm PE=1 SV=2	Atm
AYNPLPLTRL	10	H-2-Kd	WB	690.33	PD Sequest	TG	23000000	TG_1c	Q62388	1607_1616	Serine-protein kinase ATM OS=Mus musculus OX=10090 GN=Atm PE=1 SV=2	Atm
AYNPLPLTRL	10	H-2-Kd	WB	690.33	PD Mascot	HG	1900000	HG_2a	Q62388	1607_1616	Serine-protein kinase ATM OS=Mus musculus OX=10090 GN=Atm PE=1 SV=2	Atm
AYNPLPLTRL	10	H-2-Kd	WB	690.33	PD Sequest	TG	24000000	TG_1a	Q62388	1607_1616	Serine-protein kinase ATM OS=Mus musculus OX=10090 GN=Atm PE=1 SV=2	Atm
AYNPLPLTRL	10	H-2-Kd	WB	690.33	PD Mascot	TG	24000000	TG_1b	Q62388	1607_1616	Serine-protein kinase ATM OS=Mus musculus OX=10090 GN=Atm PE=1 SV=2	Atm
AYNPLPLTRL	10	H-2-Kd	WB	690.33	PD Mascot	TG	24000000	TG_1a	Q62388	1607_1616	Serine-protein kinase ATM OS=Mus musculus OX=10090 GN=Atm PE=1 SV=2	Atm
AYNPLPLTRL	10	H-2-Kd	WB	690.33	PD Sequest	HG	1900000	HG_2a	Q62388	1607_1616	Serine-protein kinase ATM OS=Mus musculus OX=10090 GN=Atm PE=1 SV=2	Atm
AYNRILDAL	9	H-2-Kd	SB	95.81	PD Mascot	TG	3000000	TG_1c	Q68FD7	388_396	Folliculin-interacting protein 1 OS=Mus musculus OX=10090 GN=Fnip1 PE=1 SV=1	Fnip1
AYQKQPTIF	9	H-2-Kd	SB	563.42	Maxquant	Control	4229400	Control_1_1a	P62281	8_16	40S ribosomal protein S11 OS=Mus musculus OX=10090 GN=Rps11 PE=1 SV=3	Rps11
AYQKQPTIF	9	H-2-Kd	SB	563.42	Maxquant	TG	5461100	TG_1a	P62281	8_16	40S ribosomal protein S11 OS=Mus musculus OX=10090 GN=Rps11 PE=1 SV=3	Rps11
AYQKQPTIF	9	H-2-Kd	SB	563.42	Maxquant	HG	714810	HG_1c	P62281	8_16	40S ribosomal protein S11 OS=Mus musculus OX=10090 GN=Rps11 PE=1 SV=3	Rps11
AYQKQPTIF	9	H-2-Kd	SB	563.42	Maxquant	TG	519210	TG_2b	P62281	8_16	40S ribosomal protein S11 OS=Mus musculus OX=10090 GN=Rps11 PE=1 SV=3	Rps11
AYQKQPTIF	9	H-2-Kd	SB	563.42	PD Mascot	Control	8500000	Control_1_1c	P62281	8_16	40S ribosomal protein S11 OS=Mus musculus OX=10090 GN=Rps11 PE=1 SV=3	Rps11
AYQKQPTIF	9	H-2-Kd	SB	563.42	Maxquant	HG	3059700	HG_2b	P62281	8_16	40S ribosomal protein S11 OS=Mus musculus OX=10090 GN=Rps11 PE=1 SV=3	Rps11
AYQKQPTIF	9	H-2-Kd	SB	563.42	Maxquant	Control	3803300	Control_1_1b	P62281	8_16	40S ribosomal protein S11 OS=Mus musculus OX=10090 GN=Rps11 PE=1 SV=3	Rps11
AYQKQPTIF	9	H-2-Kd	SB	563.42	PD Mascot	HG	3600000	HG_2a	P62281	8_16	40S ribosomal protein S11 OS=Mus musculus OX=10090 GN=Rps11 PE=1 SV=3	Rps11
AYQKQPTIF	9	H-2-Kd	SB	563.42	Maxquant	HG	804410	HG_1b	P62281	8_16	40S ribosomal protein S11 OS=Mus musculus OX=10090 GN=Rps11 PE=1 SV=3	Rps11
AYQKQPTIF	9	H-2-Kd	SB	563.42	PD Mascot	Control	10000000	Control_1_1a	P62281	8_16	40S ribosomal protein S11 OS=Mus musculus OX=10090 GN=Rps11 PE=1 SV=3	Rps11
AYQKQPTIF	9	H-2-Kd	SB	563.42	Maxquant	HG	2060700	HG_2c	P62281	8_16	40S ribosomal protein S11 OS=Mus musculus OX=10090 GN=Rps11 PE=1 SV=3	Rps11
AYQKQPTIF	9	H-2-Kd	SB	563.42	PD Mascot	TG	12000000	TG_1a	P62281	8_16	40S ribosomal protein S11 OS=Mus musculus OX=10090 GN=Rps11 PE=1 SV=3	Rps11
AYQKQPTIF	9	H-2-Kd	SB	563.42	PD Mascot	Control	10000000	Control_1_1b	P62281	8_16	40S ribosomal protein S11 OS=Mus musculus OX=10090 GN=Rps11 PE=1 SV=3	Rps11
AYQKQPTIF	9	H-2-Kd	SB	563.42	Maxquant	HG	2664800	HG_2a	P62281	8_16	40S ribosomal protein S11 OS=Mus musculus OX=10090 GN=Rps11 PE=1 SV=3	Rps11
AYQKQPTIF	9	H-2-Kd	SB	563.42	Maxquant	TG	5079100	TG_1c	P62281	8_16	40S ribosomal protein S11 OS=Mus musculus OX=10090 GN=Rps11 PE=1 SV=3	Rps11
AYQKQPTIF	9	H-2-Kd	SB	563.42	PD Mascot	HG	4700000	HG_2c	P62281	8_16	40S ribosomal protein S11 OS=Mus musculus OX=10090 GN=Rps11 PE=1 SV=3	Rps11
AYQNQETQL	9	H-2-Kd	SB	33.83	PD Mascot	TG	11000000	TG_1c	Q5SUS0	396_404	F-box/WD repeat-containing protein 10 OS=Mus musculus OX=10090 GN=Fbxw10 PE=2 SV=1	Fbxw10
AYRQLRETL	9	H-2-Kd	SB	92.04	Maxquant	TG	5478100	TG_1b	Q9D083	47_55	Kinetochore protein Spc24 OS=Mus musculus OX=10090 GN=Spc24 PE=1 SV=1	Spc24
AYRQLRETL	9	H-2-Kd	SB	92.04	PD Mascot	TG	15000000	TG_1c	Q9D083	47_55	Kinetochore protein Spc24 OS=Mus musculus OX=10090 GN=Spc24 PE=1 SV=1	Spc24
AYRQLRETL	9	H-2-Kd	SB	92.04	Maxquant	TG	1278400	TG_2b	Q9D083	47_55	Kinetochore protein Spc24 OS=Mus musculus OX=10090 GN=Spc24 PE=1 SV=1	Spc24
AYRQLRETL	9	H-2-Kd	SB	92.04	PD Mascot	TG	15000000	TG_1a	Q9D083	47_55	Kinetochore protein Spc24 OS=Mus musculus OX=10090 GN=Spc24 PE=1 SV=1	Spc24
AYRQLRETL	9	H-2-Kd	SB	92.04	Maxquant	TG	995370	TG_2c	Q9D083	47_55	Kinetochore protein Spc24 OS=Mus musculus OX=10090 GN=Spc24 PE=1 SV=1	Spc24
AYRQLRETL	9	H-2-Kd	SB	92.04	Maxquant	HG	550630	HG_1a	Q9D083	47_55	Kinetochore protein Spc24 OS=Mus musculus OX=10090 GN=Spc24 PE=1 SV=1	Spc24
AYRQLRETL	9	H-2-Kd	SB	92.04	Maxquant	HG	2016000	HG_2a	Q9D083	47_55	Kinetochore protein Spc24 OS=Mus musculus OX=10090 GN=Spc24 PE=1 SV=1	Spc24
AYRQLRETL	9	H-2-Kd	SB	92.04	Maxquant	Control	3176600	Control_1_1c	Q9D083	47_55	Kinetochore protein Spc24 OS=Mus musculus OX=10090 GN=Spc24 PE=1 SV=1	Spc24
AYRQLRETL	9	H-2-Kd	SB	92.04	Maxquant	TG	1150500	TG_2a	Q9D083	47_55	Kinetochore protein Spc24 OS=Mus musculus OX=10090 GN=Spc24 PE=1 SV=1	Spc24
AYRQLRETL	9	H-2-Kd	SB	92.04	Maxquant	HG	1493100	HG_2c	Q9D083	47_55	Kinetochore protein Spc24 OS=Mus musculus OX=10090 GN=Spc24 PE=1 SV=1	Spc24
AYRQLRETL	9	H-2-Kd	SB	92.04	Maxquant	Control	4590900	Control_1_1b	Q9D083	47_55	Kinetochore protein Spc24 OS=Mus musculus OX=10090 GN=Spc24 PE=1 SV=1	Spc24
AYRQLRETL	9	H-2-Kd	SB	92.04	Maxquant	TG	6296100	TG_1c	Q9D083	47_55	Kinetochore protein Spc24 OS=Mus musculus OX=10090 GN=Spc24 PE=1 SV=1	Spc24
AYRQLRETL	9	H-2-Kd	SB	92.04	Maxquant	Control	3738500	Control_1_1a	Q9D083	47_55	Kinetochore protein Spc24 OS=Mus musculus OX=10090 GN=Spc24 PE=1 SV=1	Spc24
AYRQLRETL	9	H-2-Kd	SB	92.04	Maxquant	TG	6507200	TG_1a	Q9D083	47_55	Kinetochore protein Spc24 OS=Mus musculus OX=10090 GN=Spc24 PE=1 SV=1	Spc24
AYRQLRETL	9	H-2-Kd	SB	92.04	Maxquant	HG	1482300	HG_2b	Q9D083	47_55	Kinetochore protein Spc24 OS=Mus musculus OX=10090 GN=Spc24 PE=1 SV=1	Spc24
AYSFGRTTI	9	H-2-Kd	SB	15.08	PD Mascot	HG	4000000	HG_2a	Q3TWI9	186_194	CSC1-like protein 2 OS=Mus musculus OX=10090 GN=Tmem63b PE=1 SV=1	Tmem63b
AYSFGRTTI	9	H-2-Kd	SB	15.08	PD Mascot	HG	6000000	HG_2b	Q3TWI9	186_194	CSC1-like protein 2 OS=Mus musculus OX=10090 GN=Tmem63b PE=1 SV=1	Tmem63b
AYSGIKNQL	9	H-2-Kd	SB	200.59	PD Mascot	TG	4900000	TG_1c	Q9ERG2	591_599	Striatin-3 OS=Mus musculus OX=10090 GN=Strn3 PE=1 SV=1	Strn3
AYSGIKNQL	9	H-2-Kd	SB	200.59	PD Mascot	Control	12000000	Control_1_1c	Q9ERG2	591_599	Striatin-3 OS=Mus musculus OX=10090 GN=Strn3 PE=1 SV=1	Strn3
AYSGIKNQL	9	H-2-Kd	SB	200.59	PD Mascot	TG	4900000	TG_1a	Q9ERG2	591_599	Striatin-3 OS=Mus musculus OX=10090 GN=Strn3 PE=1 SV=1	Strn3
AYSGIKNQL	9	H-2-Kd	SB	200.59	PD Mascot	Control	13000000	Control_1_1b	Q9ERG2	591_599	Striatin-3 OS=Mus musculus OX=10090 GN=Strn3 PE=1 SV=1	Strn3
AYSGIKNQL	9	H-2-Kd	SB	200.59	PD Mascot	HG	5100000	HG_2b	Q9ERG2	591_599	Striatin-3 OS=Mus musculus OX=10090 GN=Strn3 PE=1 SV=1	Strn3
AYSIVIRQI	9	H-2-Kd	SB	377.2	Maxquant	HG	1308300	HG_2a	Q80TP3	1780_1788	E3 ubiquitin-protein ligase UBR5 OS=Mus musculus OX=10090 GN=Ubr5 PE=1 SV=2	Ubr5
AYSIVIRQI	9	H-2-Kd	SB	377.2	PD Mascot	TG	12000000	TG_1a	Q80TP3	1780_1788	E3 ubiquitin-protein ligase UBR5 OS=Mus musculus OX=10090 GN=Ubr5 PE=1 SV=2	Ubr5
AYSIVIRQI	9	H-2-Kd	SB	377.2	Maxquant	Control	790270	Control_1_1b	Q80TP3	1780_1788	E3 ubiquitin-protein ligase UBR5 OS=Mus musculus OX=10090 GN=Ubr5 PE=1 SV=2	Ubr5
AYSIVIRQI	9	H-2-Kd	SB	377.2	Maxquant	TG	4703800	TG_1a	Q80TP3	1780_1788	E3 ubiquitin-protein ligase UBR5 OS=Mus musculus OX=10090 GN=Ubr5 PE=1 SV=2	Ubr5
AYSIVIRQI	9	H-2-Kd	SB	377.2	Maxquant	TG	793270	TG_2b	Q80TP3	1780_1788	E3 ubiquitin-protein ligase UBR5 OS=Mus musculus OX=10090 GN=Ubr5 PE=1 SV=2	Ubr5
AYSIVIRQI	9	H-2-Kd	SB	377.2	Maxquant	HG	1160600	HG_2c	Q80TP3	1780_1788	E3 ubiquitin-protein ligase UBR5 OS=Mus musculus OX=10090 GN=Ubr5 PE=1 SV=2	Ubr5
AYSIVIRQI	9	H-2-Kd	SB	377.2	Maxquant	TG	587420	TG_2a	Q80TP3	1780_1788	E3 ubiquitin-protein ligase UBR5 OS=Mus musculus OX=10090 GN=Ubr5 PE=1 SV=2	Ubr5
AYSIVIRQI	9	H-2-Kd	SB	377.2	Maxquant	TG	726860	TG_2c	Q80TP3	1780_1788	E3 ubiquitin-protein ligase UBR5 OS=Mus musculus OX=10090 GN=Ubr5 PE=1 SV=2	Ubr5
AYSIVIRQI	9	H-2-Kd	SB	377.2	Maxquant	HG	1213700	HG_2b	Q80TP3	1780_1788	E3 ubiquitin-protein ligase UBR5 OS=Mus musculus OX=10090 GN=Ubr5 PE=1 SV=2	Ubr5
AYSIVIRQI	9	H-2-Kd	SB	377.2	Maxquant	TG	5166300	TG_1c	Q80TP3	1780_1788	E3 ubiquitin-protein ligase UBR5 OS=Mus musculus OX=10090 GN=Ubr5 PE=1 SV=2	Ubr5
AYSIVIRQI	9	H-2-Kd	SB	377.2	Maxquant	TG	5672400	TG_1b	Q80TP3	1780_1788	E3 ubiquitin-protein ligase UBR5 OS=Mus musculus OX=10090 GN=Ubr5 PE=1 SV=2	Ubr5
AYSIVIRQI	9	H-2-Kd	SB	377.2	PD Mascot	HG	1200000	HG_2c	Q80TP3	1780_1788	E3 ubiquitin-protein ligase UBR5 OS=Mus musculus OX=10090 GN=Ubr5 PE=1 SV=2	Ubr5
AYSIVIRQI	9	H-2-Kd	SB	377.2	PD Mascot	TG	11000000	TG_1c	Q80TP3	1780_1788	E3 ubiquitin-protein ligase UBR5 OS=Mus musculus OX=10090 GN=Ubr5 PE=1 SV=2	Ubr5
AYSKLGNYV	9	H-2-Kd	SB	104.37	PD Mascot	TG	2800000	TG_2b	Q8BJU0	134_142	Small glutamine-rich tetratricopeptide repeat-containing protein alpha OS=Mus musculus OX=10090 GN=Sgta PE=1 SV=2	Sgta
AYSKLGNYV	9	H-2-Kd	SB	104.37	PD Mascot	TG	12000000	TG_1c	Q8BJU0	134_142	Small glutamine-rich tetratricopeptide repeat-containing protein alpha OS=Mus musculus OX=10090 GN=Sgta PE=1 SV=2	Sgta
AYVAMNERL	9	H-2-Kd	SB	43.14	PD Mascot	Control	12000000	Control_1_1b	Q9D7E4	67_75	UPF0449 protein C19orf25 homolog OS=Mus musculus OX=10090 PE=1 SV=1	UPF0449
AYVAMNERL	9	H-2-Kd	SB	43.14	PD Sequest	HG	2800000	HG_2a	Q9D7E4	67_75	UPF0449 protein C19orf25 homolog OS=Mus musculus OX=10090 PE=1 SV=1	UPF0449
AYVAMNERL	9	H-2-Kd	SB	43.14	PD Mascot	HG	2800000	HG_2a	Q9D7E4	67_75	UPF0449 protein C19orf25 homolog OS=Mus musculus OX=10090 PE=1 SV=1	UPF0449
AYVAMNERL	9	H-2-Kd	SB	43.14	PD Mascot	TG	4500000	TG_2a	Q9D7E4	67_75	UPF0449 protein C19orf25 homolog OS=Mus musculus OX=10090 PE=1 SV=1	UPF0449
AYVAMNERL	9	H-2-Kd	SB	43.14	Maxquant	HG	1396300	HG_2a	Q9D7E4	67_75	UPF0449 protein C19orf25 homolog OS=Mus musculus OX=10090 PE=1 SV=1	UPF0449
AYVAMNERL	9	H-2-Kd	SB	43.14	Maxquant	TG	3801000	TG_2c	Q9D7E4	67_75	UPF0449 protein C19orf25 homolog OS=Mus musculus OX=10090 PE=1 SV=1	UPF0449
AYVAMNERL	9	H-2-Kd	SB	43.14	PD Mascot	TG	27000000	TG_1b	Q9D7E4	67_75	UPF0449 protein C19orf25 homolog OS=Mus musculus OX=10090 PE=1 SV=1	UPF0449
AYVAMNERL	9	H-2-Kd	SB	43.14	PD Mascot	HG	15000000	HG_2c	Q9D7E4	67_75	UPF0449 protein C19orf25 homolog OS=Mus musculus OX=10090 PE=1 SV=1	UPF0449
AYVAMNERL	9	H-2-Kd	SB	43.14	Maxquant	HG	940440	HG_1b	Q9D7E4	67_75	UPF0449 protein C19orf25 homolog OS=Mus musculus OX=10090 PE=1 SV=1	UPF0449
AYVAMNERL	9	H-2-Kd	SB	43.14	PD Mascot	TG	26000000	TG_1a	Q9D7E4	67_75	UPF0449 protein C19orf25 homolog OS=Mus musculus OX=10090 PE=1 SV=1	UPF0449
AYVAMNERL	9	H-2-Kd	SB	43.14	Maxquant	TG	9778900	TG_1a	Q9D7E4	67_75	UPF0449 protein C19orf25 homolog OS=Mus musculus OX=10090 PE=1 SV=1	UPF0449
AYVAMNERL	9	H-2-Kd	SB	43.14	PD Sequest	Control	7200000	Control_1_1c	Q9D7E4	67_75	UPF0449 protein C19orf25 homolog OS=Mus musculus OX=10090 PE=1 SV=1	UPF0449
AYVAMNERL	9	H-2-Kd	SB	43.14	PD Sequest	HG	3100000	HG_2b	Q9D7E4	67_75	UPF0449 protein C19orf25 homolog OS=Mus musculus OX=10090 PE=1 SV=1	UPF0449
AYVAMNERL	9	H-2-Kd	SB	43.14	Maxquant	TG	15465000	TG_1c	Q9D7E4	67_75	UPF0449 protein C19orf25 homolog OS=Mus musculus OX=10090 PE=1 SV=1	UPF0449
AYVAMNERL	9	H-2-Kd	SB	43.14	PD Mascot	Control	5000000	Control_1_1c	Q9D7E4	67_75	UPF0449 protein C19orf25 homolog OS=Mus musculus OX=10090 PE=1 SV=1	UPF0449
AYVAMNERL	9	H-2-Kd	SB	43.14	Maxquant	HG	1278100	HG_1a	Q9D7E4	67_75	UPF0449 protein C19orf25 homolog OS=Mus musculus OX=10090 PE=1 SV=1	UPF0449
AYVAMNERL	9	H-2-Kd	SB	43.14	PD Mascot	TG	26000000	TG_1c	Q9D7E4	67_75	UPF0449 protein C19orf25 homolog OS=Mus musculus OX=10090 PE=1 SV=1	UPF0449
AYVAMNERL	9	H-2-Kd	SB	43.14	Maxquant	Control	4499200	Control_1_1b	Q9D7E4	67_75	UPF0449 protein C19orf25 homolog OS=Mus musculus OX=10090 PE=1 SV=1	UPF0449
AYVAMNERL	9	H-2-Kd	SB	43.14	PD Mascot	TG	5400000	TG_2c	Q9D7E4	67_75	UPF0449 protein C19orf25 homolog OS=Mus musculus OX=10090 PE=1 SV=1	UPF0449
AYVAMNERL	9	H-2-Kd	SB	43.14	Maxquant	TG	4353300	TG_2a	Q9D7E4	67_75	UPF0449 protein C19orf25 homolog OS=Mus musculus OX=10090 PE=1 SV=1	UPF0449
AYVAMNERL	9	H-2-Kd	SB	43.14	Maxquant	TG	15207000	TG_1b	Q9D7E4	67_75	UPF0449 protein C19orf25 homolog OS=Mus musculus OX=10090 PE=1 SV=1	UPF0449
AYVAMNERL	9	H-2-Kd	SB	43.14	Maxquant	TG	5747000	TG_2b	Q9D7E4	67_75	UPF0449 protein C19orf25 homolog OS=Mus musculus OX=10090 PE=1 SV=1	UPF0449
AYVAMNERL	9	H-2-Kd	SB	43.14	PD Mascot	HG	13000000	HG_2a	Q9D7E4	67_75	UPF0449 protein C19orf25 homolog OS=Mus musculus OX=10090 PE=1 SV=1	UPF0449
AYVAMNERL	9	H-2-Kd	SB	43.14	Maxquant	HG	2149400	HG_2b	Q9D7E4	67_75	UPF0449 protein C19orf25 homolog OS=Mus musculus OX=10090 PE=1 SV=1	UPF0449
AYVAMNERL	9	H-2-Kd	SB	43.14	PD Sequest	TG	8600000	TG_1a	Q9D7E4	67_75	UPF0449 protein C19orf25 homolog OS=Mus musculus OX=10090 PE=1 SV=1	UPF0449
AYVAMNERL	9	H-2-Kd	SB	43.14	Maxquant	Control	10092000	Control_1_1c	Q9D7E4	67_75	UPF0449 protein C19orf25 homolog OS=Mus musculus OX=10090 PE=1 SV=1	UPF0449
AYVAMNERL	9	H-2-Kd	SB	43.14	PD Mascot	TG	11000000	TG_1c	Q9D7E4	67_75	UPF0449 protein C19orf25 homolog OS=Mus musculus OX=10090 PE=1 SV=1	UPF0449
AYVAMNERL	9	H-2-Kd	SB	43.14	PD Sequest	Control	6600000	Control_1_1a	Q9D7E4	67_75	UPF0449 protein C19orf25 homolog OS=Mus musculus OX=10090 PE=1 SV=1	UPF0449
AYVAMNERL	9	H-2-Kd	SB	43.14	PD Sequest	TG	11000000	TG_1b	Q9D7E4	67_75	UPF0449 protein C19orf25 homolog OS=Mus musculus OX=10090 PE=1 SV=1	UPF0449
AYVAMNERL	9	H-2-Kd	SB	43.14	PD Sequest	TG	11000000	TG_1c	Q9D7E4	67_75	UPF0449 protein C19orf25 homolog OS=Mus musculus OX=10090 PE=1 SV=1	UPF0449
AYVAMNERL	9	H-2-Kd	SB	43.14	PD Mascot	TG	10000000	TG_2b	Q9D7E4	67_75	UPF0449 protein C19orf25 homolog OS=Mus musculus OX=10090 PE=1 SV=1	UPF0449
AYVAMNERL	9	H-2-Kd	SB	43.14	Maxquant	Control	9460000	Control_1_1a	Q9D7E4	67_75	UPF0449 protein C19orf25 homolog OS=Mus musculus OX=10090 PE=1 SV=1	UPF0449
AYVAMNERL	9	H-2-Kd	SB	43.14	PD Mascot	TG	11000000	TG_1b	Q9D7E4	67_75	UPF0449 protein C19orf25 homolog OS=Mus musculus OX=10090 PE=1 SV=1	UPF0449
AYVAMNERL	9	H-2-Kd	SB	43.14	Maxquant	HG	6910600	HG_2c	Q9D7E4	67_75	UPF0449 protein C19orf25 homolog OS=Mus musculus OX=10090 PE=1 SV=1	UPF0449
AYVAMNERL	9	H-2-Kd	SB	43.14	PD Mascot	HG	8200000	HG_2b	Q9D7E4	67_75	UPF0449 protein C19orf25 homolog OS=Mus musculus OX=10090 PE=1 SV=1	UPF0449
AYVAMNERL	9	H-2-Kd	SB	43.14	PD Mascot	Control	8500000	Control_1_1a	Q9D7E4	67_75	UPF0449 protein C19orf25 homolog OS=Mus musculus OX=10090 PE=1 SV=1	UPF0449
AYVPGFAHI	9	H-2-Kd	SB	102.14	PD Sequest	TG	35000000	TG_2a	Q9CXX9	62_70	CUE domain-containing protein 2 OS=Mus musculus OX=10090 GN=Cuedc2 PE=1 SV=1	Cuedc2
AYVPGFAHI	9	H-2-Kd	SB	102.14	PD Mascot	Control	16000000	Control_1_1b	Q9CXX9	62_70	CUE domain-containing protein 2 OS=Mus musculus OX=10090 GN=Cuedc2 PE=1 SV=1	Cuedc2
AYVPGFAHI	9	H-2-Kd	SB	102.14	PD Sequest	Control	21000000	Control_1_1c	Q9CXX9	62_70	CUE domain-containing protein 2 OS=Mus musculus OX=10090 GN=Cuedc2 PE=1 SV=1	Cuedc2
AYVPGFAHI	9	H-2-Kd	SB	102.14	PD Sequest	TG	31000000	TG_2b	Q9CXX9	62_70	CUE domain-containing protein 2 OS=Mus musculus OX=10090 GN=Cuedc2 PE=1 SV=1	Cuedc2
AYVPGFAHI	9	H-2-Kd	SB	102.14	Maxquant	TG	85860000	TG_1b	Q9CXX9	62_70	CUE domain-containing protein 2 OS=Mus musculus OX=10090 GN=Cuedc2 PE=1 SV=1	Cuedc2
AYVPGFAHI	9	H-2-Kd	SB	102.14	PD Mascot	Control	16000000	Control_1_1a	Q9CXX9	62_70	CUE domain-containing protein 2 OS=Mus musculus OX=10090 GN=Cuedc2 PE=1 SV=1	Cuedc2
AYVPGFAHI	9	H-2-Kd	SB	102.14	Maxquant	TG	16104000	TG_2c	Q9CXX9	62_70	CUE domain-containing protein 2 OS=Mus musculus OX=10090 GN=Cuedc2 PE=1 SV=1	Cuedc2
AYVPGFAHI	9	H-2-Kd	SB	102.14	PD Sequest	TG	350000000	TG_1a	Q9CXX9	62_70	CUE domain-containing protein 2 OS=Mus musculus OX=10090 GN=Cuedc2 PE=1 SV=1	Cuedc2
AYVPGFAHI	9	H-2-Kd	SB	102.14	PD Mascot	TG	350000000	TG_1a	Q9CXX9	62_70	CUE domain-containing protein 2 OS=Mus musculus OX=10090 GN=Cuedc2 PE=1 SV=1	Cuedc2
AYVPGFAHI	9	H-2-Kd	SB	102.14	PD Sequest	TG	220000000	TG_1b	Q9CXX9	62_70	CUE domain-containing protein 2 OS=Mus musculus OX=10090 GN=Cuedc2 PE=1 SV=1	Cuedc2
AYVPGFAHI	9	H-2-Kd	SB	102.14	Maxquant	TG	147390000	TG_1a	Q9CXX9	62_70	CUE domain-containing protein 2 OS=Mus musculus OX=10090 GN=Cuedc2 PE=1 SV=1	Cuedc2
AYVPGFAHI	9	H-2-Kd	SB	102.14	PD Sequest	Control	16000000	Control_1_1a	Q9CXX9	62_70	CUE domain-containing protein 2 OS=Mus musculus OX=10090 GN=Cuedc2 PE=1 SV=1	Cuedc2
AYVPGFAHI	9	H-2-Kd	SB	102.14	PD Sequest	HG	73000000	HG_2c	Q9CXX9	62_70	CUE domain-containing protein 2 OS=Mus musculus OX=10090 GN=Cuedc2 PE=1 SV=1	Cuedc2
AYVPGFAHI	9	H-2-Kd	SB	102.14	Maxquant	Control	16851000	Control_1_1b	Q9CXX9	62_70	CUE domain-containing protein 2 OS=Mus musculus OX=10090 GN=Cuedc2 PE=1 SV=1	Cuedc2
AYVPGFAHI	9	H-2-Kd	SB	102.14	PD Mascot	TG	31000000	TG_2c	Q9CXX9	62_70	CUE domain-containing protein 2 OS=Mus musculus OX=10090 GN=Cuedc2 PE=1 SV=1	Cuedc2
AYVPGFAHI	9	H-2-Kd	SB	102.14	PD Mascot	TG	31000000	TG_2b	Q9CXX9	62_70	CUE domain-containing protein 2 OS=Mus musculus OX=10090 GN=Cuedc2 PE=1 SV=1	Cuedc2
AYVPGFAHI	9	H-2-Kd	SB	102.14	PD Sequest	HG	75000000	HG_2b	Q9CXX9	62_70	CUE domain-containing protein 2 OS=Mus musculus OX=10090 GN=Cuedc2 PE=1 SV=1	Cuedc2
AYVPGFAHI	9	H-2-Kd	SB	102.14	PD Mascot	Control	21000000	Control_1_1c	Q9CXX9	62_70	CUE domain-containing protein 2 OS=Mus musculus OX=10090 GN=Cuedc2 PE=1 SV=1	Cuedc2
AYVPGFAHI	9	H-2-Kd	SB	102.14	Maxquant	HG	32425000	HG_2a	Q9CXX9	62_70	CUE domain-containing protein 2 OS=Mus musculus OX=10090 GN=Cuedc2 PE=1 SV=1	Cuedc2
AYVPGFAHI	9	H-2-Kd	SB	102.14	PD Sequest	TG	31000000	TG_2c	Q9CXX9	62_70	CUE domain-containing protein 2 OS=Mus musculus OX=10090 GN=Cuedc2 PE=1 SV=1	Cuedc2
AYVPGFAHI	9	H-2-Kd	SB	102.14	PD Mascot	TG	35000000	TG_2a	Q9CXX9	62_70	CUE domain-containing protein 2 OS=Mus musculus OX=10090 GN=Cuedc2 PE=1 SV=1	Cuedc2
AYVPGFAHI	9	H-2-Kd	SB	102.14	PD Mascot	HG	79000000	HG_2a	Q9CXX9	62_70	CUE domain-containing protein 2 OS=Mus musculus OX=10090 GN=Cuedc2 PE=1 SV=1	Cuedc2
AYVPGFAHI	9	H-2-Kd	SB	102.14	Maxquant	TG	163230000	TG_1c	Q9CXX9	62_70	CUE domain-containing protein 2 OS=Mus musculus OX=10090 GN=Cuedc2 PE=1 SV=1	Cuedc2
AYVPGFAHI	9	H-2-Kd	SB	102.14	Maxquant	TG	12163000	TG_2b	Q9CXX9	62_70	CUE domain-containing protein 2 OS=Mus musculus OX=10090 GN=Cuedc2 PE=1 SV=1	Cuedc2
AYVPGFAHI	9	H-2-Kd	SB	102.14	Maxquant	HG	32336000	HG_2c	Q9CXX9	62_70	CUE domain-containing protein 2 OS=Mus musculus OX=10090 GN=Cuedc2 PE=1 SV=1	Cuedc2
AYVPGFAHI	9	H-2-Kd	SB	102.14	Maxquant	Control	244730	Control_1_2a	Q9CXX9	62_70	CUE domain-containing protein 2 OS=Mus musculus OX=10090 GN=Cuedc2 PE=1 SV=1	Cuedc2
AYVPGFAHI	9	H-2-Kd	SB	102.14	PD Sequest	Control	16000000	Control_1_1b	Q9CXX9	62_70	CUE domain-containing protein 2 OS=Mus musculus OX=10090 GN=Cuedc2 PE=1 SV=1	Cuedc2
AYVPGFAHI	9	H-2-Kd	SB	102.14	Maxquant	Control	10379000	Control_1_1a	Q9CXX9	62_70	CUE domain-containing protein 2 OS=Mus musculus OX=10090 GN=Cuedc2 PE=1 SV=1	Cuedc2
AYVPGFAHI	9	H-2-Kd	SB	102.14	PD Mascot	HG	75000000	HG_2b	Q9CXX9	62_70	CUE domain-containing protein 2 OS=Mus musculus OX=10090 GN=Cuedc2 PE=1 SV=1	Cuedc2
AYVPGFAHI	9	H-2-Kd	SB	102.14	Maxquant	HG	31261000	HG_2b	Q9CXX9	62_70	CUE domain-containing protein 2 OS=Mus musculus OX=10090 GN=Cuedc2 PE=1 SV=1	Cuedc2
AYVPGFAHI	9	H-2-Kd	SB	102.14	Maxquant	TG	17010000	TG_2a	Q9CXX9	62_70	CUE domain-containing protein 2 OS=Mus musculus OX=10090 GN=Cuedc2 PE=1 SV=1	Cuedc2
AYVPGFAHI	9	H-2-Kd	SB	102.14	PD Sequest	HG	79000000	HG_2a	Q9CXX9	62_70	CUE domain-containing protein 2 OS=Mus musculus OX=10090 GN=Cuedc2 PE=1 SV=1	Cuedc2
AYVPGFAHI	9	H-2-Kd	SB	102.14	Maxquant	Control	8898000	Control_1_1c	Q9CXX9	62_70	CUE domain-containing protein 2 OS=Mus musculus OX=10090 GN=Cuedc2 PE=1 SV=1	Cuedc2
AYVPGFAHI	9	H-2-Kd	SB	102.14	PD Mascot	HG	73000000	HG_2c	Q9CXX9	62_70	CUE domain-containing protein 2 OS=Mus musculus OX=10090 GN=Cuedc2 PE=1 SV=1	Cuedc2
AYVPGFAHI	9	H-2-Kd	SB	102.14	PD Mascot	TG	220000000	TG_1b	Q9CXX9	62_70	CUE domain-containing protein 2 OS=Mus musculus OX=10090 GN=Cuedc2 PE=1 SV=1	Cuedc2
CVLPNYWNVL	10	H-2-Db	WB	3351.53	PD Mascot	HG	2100000	HG_2a	Q8C9M2	395_404	Coiled-coil domain-containing protein 15 OS=Mus musculus OX=10090 GN=Ccdc15 PE=2 SV=2	Ccdc15
DYGAYLNFL	9	H-2-Kd	WB	3013.62	Maxquant	HG	10179000	HG_2c	Q8VCZ7	329_337	Zinc finger and BTB domain-containing protein 7C OS=Mus musculus OX=10090 GN=Zbtb7c PE=2 SV=1	Zbtb7c
DYGAYLNFL	9	H-2-Kd	WB	3013.62	Maxquant	Control	1834500	Control_1_1b	Q8VCZ7	329_337	Zinc finger and BTB domain-containing protein 7C OS=Mus musculus OX=10090 GN=Zbtb7c PE=2 SV=1	Zbtb7c
DYGAYLNFL	9	H-2-Kd	WB	3013.62	Maxquant	HG	10700000	HG_2a	Q8VCZ7	329_337	Zinc finger and BTB domain-containing protein 7C OS=Mus musculus OX=10090 GN=Zbtb7c PE=2 SV=1	Zbtb7c
DYGAYLNFL	9	H-2-Kd	WB	3013.62	Maxquant	TG	3110000	TG_2c	Q8VCZ7	329_337	Zinc finger and BTB domain-containing protein 7C OS=Mus musculus OX=10090 GN=Zbtb7c PE=2 SV=1	Zbtb7c
DYGAYLNFL	9	H-2-Kd	WB	3013.62	Maxquant	TG	17143000	TG_1b	Q8VCZ7	329_337	Zinc finger and BTB domain-containing protein 7C OS=Mus musculus OX=10090 GN=Zbtb7c PE=2 SV=1	Zbtb7c
DYGAYLNFL	9	H-2-Kd	WB	3013.62	Maxquant	Control	1246900	Control_1_2a	Q8VCZ7	329_337	Zinc finger and BTB domain-containing protein 7C OS=Mus musculus OX=10090 GN=Zbtb7c PE=2 SV=1	Zbtb7c
DYGAYLNFL	9	H-2-Kd	WB	3013.62	Maxquant	TG	18819000	TG_1a	Q8VCZ7	329_337	Zinc finger and BTB domain-containing protein 7C OS=Mus musculus OX=10090 GN=Zbtb7c PE=2 SV=1	Zbtb7c
DYGAYLNFL	9	H-2-Kd	WB	3013.62	Maxquant	TG	18718000	TG_1c	Q8VCZ7	329_337	Zinc finger and BTB domain-containing protein 7C OS=Mus musculus OX=10090 GN=Zbtb7c PE=2 SV=1	Zbtb7c
DYGAYLNFL	9	H-2-Kd	WB	3013.62	Maxquant	Control	2686100	Control_1_1a	Q8VCZ7	329_337	Zinc finger and BTB domain-containing protein 7C OS=Mus musculus OX=10090 GN=Zbtb7c PE=2 SV=1	Zbtb7c
DYGAYLNFL	9	H-2-Kd	WB	3013.62	Maxquant	HG	10175000	HG_2b	Q8VCZ7	329_337	Zinc finger and BTB domain-containing protein 7C OS=Mus musculus OX=10090 GN=Zbtb7c PE=2 SV=1	Zbtb7c
DYGAYLNFL	9	H-2-Kd	WB	3013.62	Maxquant	TG	4409700	TG_2a	Q8VCZ7	329_337	Zinc finger and BTB domain-containing protein 7C OS=Mus musculus OX=10090 GN=Zbtb7c PE=2 SV=1	Zbtb7c
DYGAYLNFL	9	H-2-Kd	WB	3013.62	Maxquant	Control	2302900	Control_1_1c	Q8VCZ7	329_337	Zinc finger and BTB domain-containing protein 7C OS=Mus musculus OX=10090 GN=Zbtb7c PE=2 SV=1	Zbtb7c
DYIITPHAL	9	H-2-Kd	SB	166.79	PD Mascot	HG	4000000	HG_2b	Q3TWF6	530_538	WD repeat-containing protein 70 OS=Mus musculus OX=10090 GN=Wdr70 PE=1 SV=1	Wdr70
DYIITPHAL	9	H-2-Kd	SB	166.79	PD Mascot	HG	2700000	HG_2c	Q3TWF6	530_538	WD repeat-containing protein 70 OS=Mus musculus OX=10090 GN=Wdr70 PE=1 SV=1	Wdr70
DYIITPHAL	9	H-2-Kd	SB	166.79	PD Mascot	TG	12000000	TG_1b	Q3TWF6	530_538	WD repeat-containing protein 70 OS=Mus musculus OX=10090 GN=Wdr70 PE=1 SV=1	Wdr70
DYIITPHAL	9	H-2-Kd	SB	166.79	PD Mascot	TG	12000000	TG_1a	Q3TWF6	530_538	WD repeat-containing protein 70 OS=Mus musculus OX=10090 GN=Wdr70 PE=1 SV=1	Wdr70
DYLGSRQYV	9	H-2-Kd	SB	56.77	Maxquant	TG	7677900	TG_1b	P52332	990_998	Tyrosine-protein kinase JAK1 OS=Mus musculus OX=10090 GN=Jak1 PE=1 SV=1	Jak1
DYLGSRQYV	9	H-2-Kd	SB	56.77	Maxquant	HG	2806000	HG_2a	P52332	990_998	Tyrosine-protein kinase JAK1 OS=Mus musculus OX=10090 GN=Jak1 PE=1 SV=1	Jak1
DYLGSRQYV	9	H-2-Kd	SB	56.77	PD Mascot	HG	3900000	HG_2a	P52332	990_998	Tyrosine-protein kinase JAK1 OS=Mus musculus OX=10090 GN=Jak1 PE=1 SV=1	Jak1
DYLGSRQYV	9	H-2-Kd	SB	56.77	PD Mascot	TG	2900000	TG_2a	P52332	990_998	Tyrosine-protein kinase JAK1 OS=Mus musculus OX=10090 GN=Jak1 PE=1 SV=1	Jak1
DYLGSRQYV	9	H-2-Kd	SB	56.77	PD Mascot	TG	12000000	TG_1a	P52332	990_998	Tyrosine-protein kinase JAK1 OS=Mus musculus OX=10090 GN=Jak1 PE=1 SV=1	Jak1
DYLGSRQYV	9	H-2-Kd	SB	56.77	PD Mascot	Control	6200000	Control_1_1c	P52332	990_998	Tyrosine-protein kinase JAK1 OS=Mus musculus OX=10090 GN=Jak1 PE=1 SV=1	Jak1
DYLGSRQYV	9	H-2-Kd	SB	56.77	PD Mascot	HG	5300000	HG_2b	P52332	990_998	Tyrosine-protein kinase JAK1 OS=Mus musculus OX=10090 GN=Jak1 PE=1 SV=1	Jak1
DYLGSRQYV	9	H-2-Kd	SB	56.77	Maxquant	HG	2659200	HG_2c	P52332	990_998	Tyrosine-protein kinase JAK1 OS=Mus musculus OX=10090 GN=Jak1 PE=1 SV=1	Jak1
DYLGSRQYV	9	H-2-Kd	SB	56.77	PD Mascot	Control	4500000	Control_1_1a	P52332	990_998	Tyrosine-protein kinase JAK1 OS=Mus musculus OX=10090 GN=Jak1 PE=1 SV=1	Jak1
DYLGSRQYV	9	H-2-Kd	SB	56.77	Maxquant	TG	1790100	TG_2c	P52332	990_998	Tyrosine-protein kinase JAK1 OS=Mus musculus OX=10090 GN=Jak1 PE=1 SV=1	Jak1
DYLGSRQYV	9	H-2-Kd	SB	56.77	Maxquant	Control	3311300	Control_1_1c	P52332	990_998	Tyrosine-protein kinase JAK1 OS=Mus musculus OX=10090 GN=Jak1 PE=1 SV=1	Jak1
DYLGSRQYV	9	H-2-Kd	SB	56.77	PD Mascot	TG	12000000	TG_1b	P52332	990_998	Tyrosine-protein kinase JAK1 OS=Mus musculus OX=10090 GN=Jak1 PE=1 SV=1	Jak1
DYLGSRQYV	9	H-2-Kd	SB	56.77	PD Mascot	HG	4600000	HG_2c	P52332	990_998	Tyrosine-protein kinase JAK1 OS=Mus musculus OX=10090 GN=Jak1 PE=1 SV=1	Jak1
DYLGSRQYV	9	H-2-Kd	SB	56.77	Maxquant	TG	1959200	TG_2b	P52332	990_998	Tyrosine-protein kinase JAK1 OS=Mus musculus OX=10090 GN=Jak1 PE=1 SV=1	Jak1
DYLGSRQYV	9	H-2-Kd	SB	56.77	Maxquant	TG	5984700	TG_1a	P52332	990_998	Tyrosine-protein kinase JAK1 OS=Mus musculus OX=10090 GN=Jak1 PE=1 SV=1	Jak1
DYLGSRQYV	9	H-2-Kd	SB	56.77	Maxquant	TG	6712400	TG_1c	P52332	990_998	Tyrosine-protein kinase JAK1 OS=Mus musculus OX=10090 GN=Jak1 PE=1 SV=1	Jak1
DYLGSRQYV	9	H-2-Kd	SB	56.77	Maxquant	TG	2142900	TG_2a	P52332	990_998	Tyrosine-protein kinase JAK1 OS=Mus musculus OX=10090 GN=Jak1 PE=1 SV=1	Jak1
DYLGSRQYV	9	H-2-Kd	SB	56.77	Maxquant	HG	2284800	HG_2b	P52332	990_998	Tyrosine-protein kinase JAK1 OS=Mus musculus OX=10090 GN=Jak1 PE=1 SV=1	Jak1
DYNRIGSSL	9	H-2-Kd	SB	45	Maxquant	Control	3794600	Control_1_1b	Q6P8X1	243_251	Sorting nexin-6 OS=Mus musculus OX=10090 GN=Snx6 PE=1 SV=2	Snx6
DYNRIGSSL	9	H-2-Kd	SB	45	Maxquant	HG	1998500	HG_1b	Q6P8X1	243_251	Sorting nexin-6 OS=Mus musculus OX=10090 GN=Snx6 PE=1 SV=2	Snx6
DYNRIGSSL	9	H-2-Kd	SB	45	PD Sequest	HG	6800000	HG_2b	Q6P8X1	243_251	Sorting nexin-6 OS=Mus musculus OX=10090 GN=Snx6 PE=1 SV=2	Snx6
DYNRIGSSL	9	H-2-Kd	SB	45	PD Mascot	HG	4500000	HG_1a	Q6P8X1	243_251	Sorting nexin-6 OS=Mus musculus OX=10090 GN=Snx6 PE=1 SV=2	Snx6
DYNRIGSSL	9	H-2-Kd	SB	45	PD Sequest	TG	4800000	TG_2a	Q6P8X1	243_251	Sorting nexin-6 OS=Mus musculus OX=10090 GN=Snx6 PE=1 SV=2	Snx6
DYNRIGSSL	9	H-2-Kd	SB	45	PD Mascot	HG	6700000	HG_2c	Q6P8X1	243_251	Sorting nexin-6 OS=Mus musculus OX=10090 GN=Snx6 PE=1 SV=2	Snx6
DYNRIGSSL	9	H-2-Kd	SB	45	Maxquant	TG	2520300	TG_2a	Q6P8X1	243_251	Sorting nexin-6 OS=Mus musculus OX=10090 GN=Snx6 PE=1 SV=2	Snx6
DYNRIGSSL	9	H-2-Kd	SB	45	PD Mascot	HG	5800000	HG_2a	Q6P8X1	243_251	Sorting nexin-6 OS=Mus musculus OX=10090 GN=Snx6 PE=1 SV=2	Snx6
DYNRIGSSL	9	H-2-Kd	SB	45	PD Sequest	HG	5800000	HG_2a	Q6P8X1	243_251	Sorting nexin-6 OS=Mus musculus OX=10090 GN=Snx6 PE=1 SV=2	Snx6
DYNRIGSSL	9	H-2-Kd	SB	45	PD Sequest	Control	9200000	Control_1_1b	Q6P8X1	243_251	Sorting nexin-6 OS=Mus musculus OX=10090 GN=Snx6 PE=1 SV=2	Snx6
DYNRIGSSL	9	H-2-Kd	SB	45	PD Mascot	TG	4800000	TG_2a	Q6P8X1	243_251	Sorting nexin-6 OS=Mus musculus OX=10090 GN=Snx6 PE=1 SV=2	Snx6
DYNRIGSSL	9	H-2-Kd	SB	45	PD Mascot	TG	9700000	TG_1b	Q6P8X1	243_251	Sorting nexin-6 OS=Mus musculus OX=10090 GN=Snx6 PE=1 SV=2	Snx6
DYNRIGSSL	9	H-2-Kd	SB	45	Maxquant	HG	2857000	HG_2c	Q6P8X1	243_251	Sorting nexin-6 OS=Mus musculus OX=10090 GN=Snx6 PE=1 SV=2	Snx6
DYNRIGSSL	9	H-2-Kd	SB	45	PD Sequest	Control	10000000	Control_1_1c	Q6P8X1	243_251	Sorting nexin-6 OS=Mus musculus OX=10090 GN=Snx6 PE=1 SV=2	Snx6
DYNRIGSSL	9	H-2-Kd	SB	45	Maxquant	TG	4353800	TG_1c	Q6P8X1	243_251	Sorting nexin-6 OS=Mus musculus OX=10090 GN=Snx6 PE=1 SV=2	Snx6
DYNRIGSSL	9	H-2-Kd	SB	45	PD Mascot	TG	6200000	TG_1c	Q6P8X1	243_251	Sorting nexin-6 OS=Mus musculus OX=10090 GN=Snx6 PE=1 SV=2	Snx6
DYNRIGSSL	9	H-2-Kd	SB	45	Maxquant	HG	1524500	HG_1a	Q6P8X1	243_251	Sorting nexin-6 OS=Mus musculus OX=10090 GN=Snx6 PE=1 SV=2	Snx6
DYNRIGSSL	9	H-2-Kd	SB	45	Maxquant	TG	3679800	TG_1b	Q6P8X1	243_251	Sorting nexin-6 OS=Mus musculus OX=10090 GN=Snx6 PE=1 SV=2	Snx6
DYNRIGSSL	9	H-2-Kd	SB	45	PD Mascot	HG	6800000	HG_2b	Q6P8X1	243_251	Sorting nexin-6 OS=Mus musculus OX=10090 GN=Snx6 PE=1 SV=2	Snx6
DYNRIGSSL	9	H-2-Kd	SB	45	PD Mascot	HG	4400000	HG_1b	Q6P8X1	243_251	Sorting nexin-6 OS=Mus musculus OX=10090 GN=Snx6 PE=1 SV=2	Snx6
DYNRIGSSL	9	H-2-Kd	SB	45	PD Sequest	HG	4500000	HG_1a	Q6P8X1	243_251	Sorting nexin-6 OS=Mus musculus OX=10090 GN=Snx6 PE=1 SV=2	Snx6
DYNRIGSSL	9	H-2-Kd	SB	45	Maxquant	HG	3440600	HG_2b	Q6P8X1	243_251	Sorting nexin-6 OS=Mus musculus OX=10090 GN=Snx6 PE=1 SV=2	Snx6
DYNRIGSSL	9	H-2-Kd	SB	45	Maxquant	Control	3820200	Control_1_1a	Q6P8X1	243_251	Sorting nexin-6 OS=Mus musculus OX=10090 GN=Snx6 PE=1 SV=2	Snx6
DYNRIGSSL	9	H-2-Kd	SB	45	PD Mascot	TG	6400000	TG_1a	Q6P8X1	243_251	Sorting nexin-6 OS=Mus musculus OX=10090 GN=Snx6 PE=1 SV=2	Snx6
DYNRIGSSL	9	H-2-Kd	SB	45	PD Sequest	TG	6400000	TG_1a	Q6P8X1	243_251	Sorting nexin-6 OS=Mus musculus OX=10090 GN=Snx6 PE=1 SV=2	Snx6
DYNRIGSSL	9	H-2-Kd	SB	45	PD Sequest	Control	9500000	Control_1_1a	Q6P8X1	243_251	Sorting nexin-6 OS=Mus musculus OX=10090 GN=Snx6 PE=1 SV=2	Snx6
DYNRIGSSL	9	H-2-Kd	SB	45	PD Sequest	HG	6700000	HG_2c	Q6P8X1	243_251	Sorting nexin-6 OS=Mus musculus OX=10090 GN=Snx6 PE=1 SV=2	Snx6
DYNRIGSSL	9	H-2-Kd	SB	45	PD Mascot	Control	9200000	Control_1_1b	Q6P8X1	243_251	Sorting nexin-6 OS=Mus musculus OX=10090 GN=Snx6 PE=1 SV=2	Snx6
DYNRIGSSL	9	H-2-Kd	SB	45	PD Sequest	HG	4400000	HG_1b	Q6P8X1	243_251	Sorting nexin-6 OS=Mus musculus OX=10090 GN=Snx6 PE=1 SV=2	Snx6
DYNRIGSSL	9	H-2-Kd	SB	45	PD Mascot	Control	9500000	Control_1_1a	Q6P8X1	243_251	Sorting nexin-6 OS=Mus musculus OX=10090 GN=Snx6 PE=1 SV=2	Snx6
DYNRIGSSL	9	H-2-Kd	SB	45	Maxquant	HG	2749200	HG_2a	Q6P8X1	243_251	Sorting nexin-6 OS=Mus musculus OX=10090 GN=Snx6 PE=1 SV=2	Snx6
DYNRIGSSL	9	H-2-Kd	SB	45	PD Sequest	TG	9700000	TG_1b	Q6P8X1	243_251	Sorting nexin-6 OS=Mus musculus OX=10090 GN=Snx6 PE=1 SV=2	Snx6
DYNRIGSSL	9	H-2-Kd	SB	45	PD Sequest	HG	2300000	HG_1c	Q6P8X1	243_251	Sorting nexin-6 OS=Mus musculus OX=10090 GN=Snx6 PE=1 SV=2	Snx6
DYNRIGSSL	9	H-2-Kd	SB	45	PD Mascot	HG	2300000	HG_1c	Q6P8X1	243_251	Sorting nexin-6 OS=Mus musculus OX=10090 GN=Snx6 PE=1 SV=2	Snx6
DYQALRTSI	9	H-2-Kd	SB	8.71	PD Mascot	HG	2300000	HG_2a	Q68FD5	1475_1483	Clathrin heavy chain 1 OS=Mus musculus OX=10090 GN=Cltc PE=1 SV=3	Cltc
DYQALRTSI	9	H-2-Kd	SB	8.71	Maxquant	Control	2442900	Control_1_1b	Q68FD5	1475_1483	Clathrin heavy chain 1 OS=Mus musculus OX=10090 GN=Cltc PE=1 SV=3	Cltc
DYQALRTSI	9	H-2-Kd	SB	8.71	PD Mascot	HG	1700000	HG_2b	Q68FD5	1475_1483	Clathrin heavy chain 1 OS=Mus musculus OX=10090 GN=Cltc PE=1 SV=3	Cltc
DYQALRTSI	9	H-2-Kd	SB	8.71	PD Mascot	TG	1200000	TG_2b	Q68FD5	1475_1483	Clathrin heavy chain 1 OS=Mus musculus OX=10090 GN=Cltc PE=1 SV=3	Cltc
DYQALRTSI	9	H-2-Kd	SB	8.71	PD Sequest	TG	3300000	TG_2a	Q68FD5	1475_1483	Clathrin heavy chain 1 OS=Mus musculus OX=10090 GN=Cltc PE=1 SV=3	Cltc
DYQALRTSI	9	H-2-Kd	SB	8.71	PD Sequest	TG	2800000	TG_2c	Q68FD5	1475_1483	Clathrin heavy chain 1 OS=Mus musculus OX=10090 GN=Cltc PE=1 SV=3	Cltc
DYQALRTSI	9	H-2-Kd	SB	8.71	PD Mascot	TG	7700000	TG_1c	Q68FD5	1475_1483	Clathrin heavy chain 1 OS=Mus musculus OX=10090 GN=Cltc PE=1 SV=3	Cltc
DYQALRTSI	9	H-2-Kd	SB	8.71	Maxquant	TG	2333500	TG_2c	Q68FD5	1475_1483	Clathrin heavy chain 1 OS=Mus musculus OX=10090 GN=Cltc PE=1 SV=3	Cltc
DYQALRTSI	9	H-2-Kd	SB	8.71	Maxquant	TG	6172400	TG_1b	Q68FD5	1475_1483	Clathrin heavy chain 1 OS=Mus musculus OX=10090 GN=Cltc PE=1 SV=3	Cltc
DYQALRTSI	9	H-2-Kd	SB	8.71	PD Sequest	TG	7100000	TG_1b	Q68FD5	1475_1483	Clathrin heavy chain 1 OS=Mus musculus OX=10090 GN=Cltc PE=1 SV=3	Cltc
DYQALRTSI	9	H-2-Kd	SB	8.71	PD Sequest	HG	1700000	HG_2b	Q68FD5	1475_1483	Clathrin heavy chain 1 OS=Mus musculus OX=10090 GN=Cltc PE=1 SV=3	Cltc
DYQALRTSI	9	H-2-Kd	SB	8.71	PD Sequest	HG	2300000	HG_2a	Q68FD5	1475_1483	Clathrin heavy chain 1 OS=Mus musculus OX=10090 GN=Cltc PE=1 SV=3	Cltc
DYQALRTSI	9	H-2-Kd	SB	8.71	PD Mascot	Control	3400000	Control_1_1b	Q68FD5	1475_1483	Clathrin heavy chain 1 OS=Mus musculus OX=10090 GN=Cltc PE=1 SV=3	Cltc
DYQALRTSI	9	H-2-Kd	SB	8.71	Maxquant	HG	1965800	HG_2a	Q68FD5	1475_1483	Clathrin heavy chain 1 OS=Mus musculus OX=10090 GN=Cltc PE=1 SV=3	Cltc
DYQALRTSI	9	H-2-Kd	SB	8.71	PD Sequest	TG	7700000	TG_1c	Q68FD5	1475_1483	Clathrin heavy chain 1 OS=Mus musculus OX=10090 GN=Cltc PE=1 SV=3	Cltc
DYQALRTSI	9	H-2-Kd	SB	8.71	Maxquant	HG	1312600	HG_2b	Q68FD5	1475_1483	Clathrin heavy chain 1 OS=Mus musculus OX=10090 GN=Cltc PE=1 SV=3	Cltc
DYQALRTSI	9	H-2-Kd	SB	8.71	PD Mascot	TG	2800000	TG_2c	Q68FD5	1475_1483	Clathrin heavy chain 1 OS=Mus musculus OX=10090 GN=Cltc PE=1 SV=3	Cltc
DYQALRTSI	9	H-2-Kd	SB	8.71	PD Sequest	Control	3400000	Control_1_1b	Q68FD5	1475_1483	Clathrin heavy chain 1 OS=Mus musculus OX=10090 GN=Cltc PE=1 SV=3	Cltc
DYQALRTSI	9	H-2-Kd	SB	8.71	PD Mascot	TG	3300000	TG_2a	Q68FD5	1475_1483	Clathrin heavy chain 1 OS=Mus musculus OX=10090 GN=Cltc PE=1 SV=3	Cltc
DYQALRTSI	9	H-2-Kd	SB	8.71	PD Sequest	TG	1200000	TG_2b	Q68FD5	1475_1483	Clathrin heavy chain 1 OS=Mus musculus OX=10090 GN=Cltc PE=1 SV=3	Cltc
DYQALRTSI	9	H-2-Kd	SB	8.71	PD Sequest	Control	590000	Control_1_1a	Q68FD5	1475_1483	Clathrin heavy chain 1 OS=Mus musculus OX=10090 GN=Cltc PE=1 SV=3	Cltc
DYQELMNTK	9	H-2-Kd	WB	750.79	Maxquant	HG	1509600	HG_1a	Q3TTY5	482_490	Keratin, type II cytoskeletal 2 epidermal OS=Mus musculus OX=10090 GN=Krt2 PE=1 SV=1	Krt2
DYQELMNTK	9	H-2-Kd	WB	750.79	Maxquant	HG	1800500	HG_1b	Q3TTY5	482_490	Keratin, type II cytoskeletal 2 epidermal OS=Mus musculus OX=10090 GN=Krt2 PE=1 SV=1	Krt2
DYQELMNTK	9	H-2-Kd	WB	750.79	PD Mascot	HG	2500000	HG_1a	Q3TTY5	482_490	Keratin, type II cytoskeletal 2 epidermal OS=Mus musculus OX=10090 GN=Krt2 PE=1 SV=1	Krt2
DYQELMNTK	9	H-2-Kd	WB	750.79	Maxquant	Control	2943600	Control_1_1c	Q3TTY5	482_490	Keratin, type II cytoskeletal 2 epidermal OS=Mus musculus OX=10090 GN=Krt2 PE=1 SV=1	Krt2
DYQELMNTK	9	H-2-Kd	WB	750.79	Maxquant	TG	899540	TG_1a	Q3TTY5	482_490	Keratin, type II cytoskeletal 2 epidermal OS=Mus musculus OX=10090 GN=Krt2 PE=1 SV=1	Krt2
DYQELMNTK	9	H-2-Kd	WB	750.79	PD Mascot	HG	2400000	HG_1b	Q3TTY5	482_490	Keratin, type II cytoskeletal 2 epidermal OS=Mus musculus OX=10090 GN=Krt2 PE=1 SV=1	Krt2
DYQELMNTK	9	H-2-Kd	WB	750.79	Maxquant	Control	2376600	Control_1_1b	Q3TTY5	482_490	Keratin, type II cytoskeletal 2 epidermal OS=Mus musculus OX=10090 GN=Krt2 PE=1 SV=1	Krt2
DYQELMNTK	9	H-2-Kd	WB	750.79	Maxquant	HG	1476300	HG_1c	Q3TTY5	482_490	Keratin, type II cytoskeletal 2 epidermal OS=Mus musculus OX=10090 GN=Krt2 PE=1 SV=1	Krt2
DYQELMNTK	9	H-2-Kd	WB	750.79	Maxquant	TG	823260	TG_1b	Q3TTY5	482_490	Keratin, type II cytoskeletal 2 epidermal OS=Mus musculus OX=10090 GN=Krt2 PE=1 SV=1	Krt2
DYQELMNTK	9	H-2-Kd	WB	750.79	Maxquant	TG	1111600	TG_1c	Q3TTY5	482_490	Keratin, type II cytoskeletal 2 epidermal OS=Mus musculus OX=10090 GN=Krt2 PE=1 SV=1	Krt2
DYQELMNTK	9	H-2-Kd	WB	750.79	PD Mascot	HG	2300000	HG_1c	Q3TTY5	482_490	Keratin, type II cytoskeletal 2 epidermal OS=Mus musculus OX=10090 GN=Krt2 PE=1 SV=1	Krt2
DYQELMNTK	9	H-2-Kd	WB	750.79	PD Mascot	Control	5700000	Control_1_1c	Q3TTY5	482_490	Keratin, type II cytoskeletal 2 epidermal OS=Mus musculus OX=10090 GN=Krt2 PE=1 SV=1	Krt2
DYQELMNTK	9	H-2-Kd	WB	750.79	Maxquant	Control	3047200	Control_1_1a	Q3TTY5	482_490	Keratin, type II cytoskeletal 2 epidermal OS=Mus musculus OX=10090 GN=Krt2 PE=1 SV=1	Krt2
DYQELMNTK	9	H-2-Kd	WB	750.79	PD Mascot	Control	5400000	Control_1_1b	Q3TTY5	482_490	Keratin, type II cytoskeletal 2 epidermal OS=Mus musculus OX=10090 GN=Krt2 PE=1 SV=1	Krt2
DYQELMNTK	9	H-2-Kd	WB	750.79	Maxquant	HG	434780	HG_2c	Q3TTY5	482_490	Keratin, type II cytoskeletal 2 epidermal OS=Mus musculus OX=10090 GN=Krt2 PE=1 SV=1	Krt2
EYAILMTMVLT	11	H-2-Kd	WB	2216.59	PD Mascot	TG	6000000	TG_1a	Q9DBY1	176_186	E3 ubiquitin-protein ligase synoviolin OS=Mus musculus OX=10090 GN=Syvn1 PE=1 SV=3	Syvn1
EYAILMTMVLT	11	H-2-Kd	WB	2216.59	PD Mascot	TG	6700000	TG_1b	Q9DBY1	176_186	E3 ubiquitin-protein ligase synoviolin OS=Mus musculus OX=10090 GN=Syvn1 PE=1 SV=3	Syvn1
EYAILMTMVLT	11	H-2-Kd	WB	2216.59	PD Mascot	TG	6300000	TG_1c	Q9DBY1	176_186	E3 ubiquitin-protein ligase synoviolin OS=Mus musculus OX=10090 GN=Syvn1 PE=1 SV=3	Syvn1
EYIHSKNFI	9	H-2-Kd	SB	26.77	Maxquant	TG	39240000	TG_1b	Q9JMK2	116_124	Casein kinase I isoform epsilon OS=Mus musculus OX=10090 GN=Csnk1e PE=1 SV=2	Csnk1e
EYIHSKNFI	9	H-2-Kd	SB	26.77	Maxquant	HG	6360200	HG_2b	Q9JMK2	116_124	Casein kinase I isoform epsilon OS=Mus musculus OX=10090 GN=Csnk1e PE=1 SV=2	Csnk1e
EYIHSKNFI	9	H-2-Kd	SB	26.77	Maxquant	HG	1465100	HG_1a	Q9JMK2	116_124	Casein kinase I isoform epsilon OS=Mus musculus OX=10090 GN=Csnk1e PE=1 SV=2	Csnk1e
EYIHSKNFI	9	H-2-Kd	SB	26.77	Maxquant	Control	11415000	Control_1_1c	Q9JMK2	116_124	Casein kinase I isoform epsilon OS=Mus musculus OX=10090 GN=Csnk1e PE=1 SV=2	Csnk1e
EYIHSKNFI	9	H-2-Kd	SB	26.77	PD Mascot	TG	4300000	TG_2b	Q9JMK2	116_124	Casein kinase I isoform epsilon OS=Mus musculus OX=10090 GN=Csnk1e PE=1 SV=2	Csnk1e
EYIHSKNFI	9	H-2-Kd	SB	26.77	Maxquant	TG	38017000	TG_1c	Q9JMK2	116_124	Casein kinase I isoform epsilon OS=Mus musculus OX=10090 GN=Csnk1e PE=1 SV=2	Csnk1e
EYIHSKNFI	9	H-2-Kd	SB	26.77	Maxquant	TG	30455000	TG_1a	Q9JMK2	116_124	Casein kinase I isoform epsilon OS=Mus musculus OX=10090 GN=Csnk1e PE=1 SV=2	Csnk1e
EYIHSKNFI	9	H-2-Kd	SB	26.77	Maxquant	TG	182510	TG_2a	Q9JMK2	116_124	Casein kinase I isoform epsilon OS=Mus musculus OX=10090 GN=Csnk1e PE=1 SV=2	Csnk1e
EYIHSKNFI	9	H-2-Kd	SB	26.77	Maxquant	TG	2239700	TG_2c	Q9JMK2	116_124	Casein kinase I isoform epsilon OS=Mus musculus OX=10090 GN=Csnk1e PE=1 SV=2	Csnk1e
EYIHSKNFI	9	H-2-Kd	SB	26.77	PD Mascot	TG	74000000	TG_1b	Q9JMK2	116_124	Casein kinase I isoform epsilon OS=Mus musculus OX=10090 GN=Csnk1e PE=1 SV=2	Csnk1e
EYIHSKNFI	9	H-2-Kd	SB	26.77	Maxquant	HG	12169000	HG_2c	Q9JMK2	116_124	Casein kinase I isoform epsilon OS=Mus musculus OX=10090 GN=Csnk1e PE=1 SV=2	Csnk1e
EYIHSKNFI	9	H-2-Kd	SB	26.77	PD Mascot	TG	79000000	TG_1c	Q9JMK2	116_124	Casein kinase I isoform epsilon OS=Mus musculus OX=10090 GN=Csnk1e PE=1 SV=2	Csnk1e
EYIHSKNFI	9	H-2-Kd	SB	26.77	Maxquant	HG	5661600	HG_2a	Q9JMK2	116_124	Casein kinase I isoform epsilon OS=Mus musculus OX=10090 GN=Csnk1e PE=1 SV=2	Csnk1e
EYIHSKNFI	9	H-2-Kd	SB	26.77	Maxquant	HG	1503500	HG_1c	Q9JMK2	116_124	Casein kinase I isoform epsilon OS=Mus musculus OX=10090 GN=Csnk1e PE=1 SV=2	Csnk1e
EYIHSKNFI	9	H-2-Kd	SB	26.77	Maxquant	Control	11483000	Control_1_1a	Q9JMK2	116_124	Casein kinase I isoform epsilon OS=Mus musculus OX=10090 GN=Csnk1e PE=1 SV=2	Csnk1e
EYIKVITGL	9	H-2-Kd	SB	78.73	Maxquant	Control	1253300	Control_1_1a	Q6A070	1544_1552	TOG array regulator of axonemal microtubules protein 1 OS=Mus musculus OX=10090 GN=Togaram1 PE=1 SV=3	Togaram1
EYIKVITGL	9	H-2-Kd	SB	78.73	Maxquant	TG	3568000	TG_2b	Q6A070	1544_1552	TOG array regulator of axonemal microtubules protein 1 OS=Mus musculus OX=10090 GN=Togaram1 PE=1 SV=3	Togaram1
EYIKVITGL	9	H-2-Kd	SB	78.73	PD Mascot	TG	68000000	TG_1c	Q6A070	1544_1552	TOG array regulator of axonemal microtubules protein 1 OS=Mus musculus OX=10090 GN=Togaram1 PE=1 SV=3	Togaram1
EYIKVITGL	9	H-2-Kd	SB	78.73	Maxquant	TG	3702000	TG_2c	Q6A070	1544_1552	TOG array regulator of axonemal microtubules protein 1 OS=Mus musculus OX=10090 GN=Togaram1 PE=1 SV=3	Togaram1
EYIKVITGL	9	H-2-Kd	SB	78.73	Maxquant	TG	40421000	TG_1a	Q6A070	1544_1552	TOG array regulator of axonemal microtubules protein 1 OS=Mus musculus OX=10090 GN=Togaram1 PE=1 SV=3	Togaram1
EYIKVITGL	9	H-2-Kd	SB	78.73	PD Mascot	TG	59000000	TG_1b	Q6A070	1544_1552	TOG array regulator of axonemal microtubules protein 1 OS=Mus musculus OX=10090 GN=Togaram1 PE=1 SV=3	Togaram1
EYIKVITGL	9	H-2-Kd	SB	78.73	Maxquant	TG	896710	TG_1b	Q6A070	1544_1552	TOG array regulator of axonemal microtubules protein 1 OS=Mus musculus OX=10090 GN=Togaram1 PE=1 SV=3	Togaram1
EYIKVITGL	9	H-2-Kd	SB	78.73	Maxquant	HG	4707400	HG_2a	Q6A070	1544_1552	TOG array regulator of axonemal microtubules protein 1 OS=Mus musculus OX=10090 GN=Togaram1 PE=1 SV=3	Togaram1
EYIKVITGL	9	H-2-Kd	SB	78.73	Maxquant	TG	3308400	TG_2a	Q6A070	1544_1552	TOG array regulator of axonemal microtubules protein 1 OS=Mus musculus OX=10090 GN=Togaram1 PE=1 SV=3	Togaram1
EYIKVITGL	9	H-2-Kd	SB	78.73	Maxquant	TG	40670000	TG_1c	Q6A070	1544_1552	TOG array regulator of axonemal microtubules protein 1 OS=Mus musculus OX=10090 GN=Togaram1 PE=1 SV=3	Togaram1
EYIKVITGL	9	H-2-Kd	SB	78.73	Maxquant	HG	5922700	HG_2c	Q6A070	1544_1552	TOG array regulator of axonemal microtubules protein 1 OS=Mus musculus OX=10090 GN=Togaram1 PE=1 SV=3	Togaram1
EYIKVITGL	9	H-2-Kd	SB	78.73	Maxquant	HG	5785300	HG_2b	Q6A070	1544_1552	TOG array regulator of axonemal microtubules protein 1 OS=Mus musculus OX=10090 GN=Togaram1 PE=1 SV=3	Togaram1
EYIKVITGL	9	H-2-Kd	SB	78.73	PD Mascot	TG	6800000	TG_2c	Q6A070	1544_1552	TOG array regulator of axonemal microtubules protein 1 OS=Mus musculus OX=10090 GN=Togaram1 PE=1 SV=3	Togaram1
EYIKVITGL	9	H-2-Kd	SB	78.73	PD Mascot	TG	6300000	TG_2b	Q6A070	1544_1552	TOG array regulator of axonemal microtubules protein 1 OS=Mus musculus OX=10090 GN=Togaram1 PE=1 SV=3	Togaram1
EYLQNLNHI	9	H-2-Db	WB	5614.04	PD Mascot	TG	5200000	TG_1c	Q45VK7	1336_1344	Cytoplasmic dynein 2 heavy chain 1 OS=Mus musculus OX=10090 GN=Dync2h1 PE=1 SV=1	Dync2h1
EYLQNLNHI	9	H-2-Db	WB	5614.04	PD Mascot	TG	5300000	TG_1b	Q45VK7	1336_1344	Cytoplasmic dynein 2 heavy chain 1 OS=Mus musculus OX=10090 GN=Dync2h1 PE=1 SV=1	Dync2h1
EYLQNLNHI	9	H-2-Kd	SB	61.61	Maxquant	TG	2322600	TG_1b	Q45VK7	1336_1344	Cytoplasmic dynein 2 heavy chain 1 OS=Mus musculus OX=10090 GN=Dync2h1 PE=1 SV=1	Dync2h1
EYLQNLNHI	9	H-2-Kd	SB	61.61	Maxquant	HG	790890	HG_2b	Q45VK7	1336_1344	Cytoplasmic dynein 2 heavy chain 1 OS=Mus musculus OX=10090 GN=Dync2h1 PE=1 SV=1	Dync2h1
EYLQNLNHI	9	H-2-Db	WB	5614.04	Maxquant	TG	2227300	TG_1c	Q45VK7	1336_1344	Cytoplasmic dynein 2 heavy chain 1 OS=Mus musculus OX=10090 GN=Dync2h1 PE=1 SV=1	Dync2h1
EYLQNLNHI	9	H-2-Db	WB	5614.04	Maxquant	HG	790890	HG_2b	Q45VK7	1336_1344	Cytoplasmic dynein 2 heavy chain 1 OS=Mus musculus OX=10090 GN=Dync2h1 PE=1 SV=1	Dync2h1
EYLQNLNHI	9	H-2-Kd	SB	61.61	PD Mascot	TG	4900000	TG_1a	Q45VK7	1336_1344	Cytoplasmic dynein 2 heavy chain 1 OS=Mus musculus OX=10090 GN=Dync2h1 PE=1 SV=1	Dync2h1
EYLQNLNHI	9	H-2-Kd	SB	61.61	PD Mascot	TG	5200000	TG_1c	Q45VK7	1336_1344	Cytoplasmic dynein 2 heavy chain 1 OS=Mus musculus OX=10090 GN=Dync2h1 PE=1 SV=1	Dync2h1
EYLQNLNHI	9	H-2-Db	WB	5614.04	Maxquant	TG	2678500	TG_1a	Q45VK7	1336_1344	Cytoplasmic dynein 2 heavy chain 1 OS=Mus musculus OX=10090 GN=Dync2h1 PE=1 SV=1	Dync2h1
EYLQNLNHI	9	H-2-Kd	SB	61.61	Maxquant	TG	2678500	TG_1a	Q45VK7	1336_1344	Cytoplasmic dynein 2 heavy chain 1 OS=Mus musculus OX=10090 GN=Dync2h1 PE=1 SV=1	Dync2h1
EYLQNLNHI	9	H-2-Kd	SB	61.61	PD Mascot	TG	5300000	TG_1b	Q45VK7	1336_1344	Cytoplasmic dynein 2 heavy chain 1 OS=Mus musculus OX=10090 GN=Dync2h1 PE=1 SV=1	Dync2h1
EYLQNLNHI	9	H-2-Db	WB	5614.04	PD Mascot	TG	4900000	TG_1a	Q45VK7	1336_1344	Cytoplasmic dynein 2 heavy chain 1 OS=Mus musculus OX=10090 GN=Dync2h1 PE=1 SV=1	Dync2h1
EYLQNLNHI	9	H-2-Kd	SB	61.61	Maxquant	TG	2227300	TG_1c	Q45VK7	1336_1344	Cytoplasmic dynein 2 heavy chain 1 OS=Mus musculus OX=10090 GN=Dync2h1 PE=1 SV=1	Dync2h1
EYLQNLNHI	9	H-2-Db	WB	5614.04	Maxquant	TG	2322600	TG_1b	Q45VK7	1336_1344	Cytoplasmic dynein 2 heavy chain 1 OS=Mus musculus OX=10090 GN=Dync2h1 PE=1 SV=1	Dync2h1
EYVANLTEL	9	H-2-Kd	SB	100.38	Maxquant	TG	7379900	TG_2b	Q3TKT4	558_566	Transcription activator BRG1 OS=Mus musculus OX=10090 GN=Smarca4 PE=1 SV=1	Smarca4
EYVANLTEL	9	H-2-Kd	SB	100.38	Maxquant	Control	1531200	Control_1_2a	Q3TKT4	558_566	Transcription activator BRG1 OS=Mus musculus OX=10090 GN=Smarca4 PE=1 SV=1	Smarca4
EYVANLTEL	9	H-2-Kd	SB	100.38	Maxquant	TG	13635000	TG_1a	Q3TKT4	558_566	Transcription activator BRG1 OS=Mus musculus OX=10090 GN=Smarca4 PE=1 SV=1	Smarca4
EYVANLTEL	9	H-2-Kd	SB	100.38	Maxquant	TG	17074000	TG_1b	Q3TKT4	558_566	Transcription activator BRG1 OS=Mus musculus OX=10090 GN=Smarca4 PE=1 SV=1	Smarca4
EYVANLTEL	9	H-2-Kd	SB	100.38	Maxquant	TG	16232000	TG_1c	Q3TKT4	558_566	Transcription activator BRG1 OS=Mus musculus OX=10090 GN=Smarca4 PE=1 SV=1	Smarca4
EYVANLTEL	9	H-2-Kd	SB	100.38	Maxquant	TG	371070	TG_2c	Q3TKT4	558_566	Transcription activator BRG1 OS=Mus musculus OX=10090 GN=Smarca4 PE=1 SV=1	Smarca4
EYVANLTEL	9	H-2-Kd	SB	100.38	Maxquant	Control	4374500	Control_1_1c	Q3TKT4	558_566	Transcription activator BRG1 OS=Mus musculus OX=10090 GN=Smarca4 PE=1 SV=1	Smarca4
EYVANLTEL	9	H-2-Kd	SB	100.38	Maxquant	HG	16982000	HG_2c	Q3TKT4	558_566	Transcription activator BRG1 OS=Mus musculus OX=10090 GN=Smarca4 PE=1 SV=1	Smarca4
EYVANLTEL	9	H-2-Kd	SB	100.38	Maxquant	HG	810540	HG_1b	Q3TKT4	558_566	Transcription activator BRG1 OS=Mus musculus OX=10090 GN=Smarca4 PE=1 SV=1	Smarca4
EYVANLTEL	9	H-2-Kd	SB	100.38	Maxquant	Control	1275400	Control_1_2b	Q3TKT4	558_566	Transcription activator BRG1 OS=Mus musculus OX=10090 GN=Smarca4 PE=1 SV=1	Smarca4
EYVANLTEL	9	H-2-Kd	SB	100.38	Maxquant	Control	1380100	Control_1_2c	Q3TKT4	558_566	Transcription activator BRG1 OS=Mus musculus OX=10090 GN=Smarca4 PE=1 SV=1	Smarca4
EYVANLTEL	9	H-2-Kd	SB	100.38	Maxquant	HG	18895000	HG_2a	Q3TKT4	558_566	Transcription activator BRG1 OS=Mus musculus OX=10090 GN=Smarca4 PE=1 SV=1	Smarca4
EYVANLTEL	9	H-2-Kd	SB	100.38	Maxquant	TG	6402600	TG_2a	Q3TKT4	558_566	Transcription activator BRG1 OS=Mus musculus OX=10090 GN=Smarca4 PE=1 SV=1	Smarca4
EYVANLTEL	9	H-2-Kd	SB	100.38	Maxquant	Control	4325000	Control_1_1b	Q3TKT4	558_566	Transcription activator BRG1 OS=Mus musculus OX=10090 GN=Smarca4 PE=1 SV=1	Smarca4
EYVANLTEL	9	H-2-Kd	SB	100.38	Maxquant	HG	19626000	HG_2b	Q3TKT4	558_566	Transcription activator BRG1 OS=Mus musculus OX=10090 GN=Smarca4 PE=1 SV=1	Smarca4
EYVANLTEL	9	H-2-Kd	SB	100.38	Maxquant	Control	4955000	Control_1_1a	Q3TKT4	558_566	Transcription activator BRG1 OS=Mus musculus OX=10090 GN=Smarca4 PE=1 SV=1	Smarca4
FAPVNVTTEVK	11	H-2-Db	SB	57.34	Maxquant	Control	795620	Control_1_2c	P10126	279_289	Elongation factor 1-alpha 1 OS=Mus musculus OX=10090 GN=Eef1a1 PE=1 SV=3	Eef1a1
FAPVNVTTEVK	11	H-2-Db	SB	57.34	PD Sequest	Control	4100000	Control_1_1a	P10126	279_289	Elongation factor 1-alpha 1 OS=Mus musculus OX=10090 GN=Eef1a1 PE=1 SV=3	Eef1a1
FAPVNVTTEVK	11	H-2-Db	SB	57.34	PD Mascot	HG	8600000	HG_2a	P10126	279_289	Elongation factor 1-alpha 1 OS=Mus musculus OX=10090 GN=Eef1a1 PE=1 SV=3	Eef1a1
FAPVNVTTEVK	11	H-2-Db	SB	57.34	Maxquant	Control	847790	Control_1_2a	P10126	279_289	Elongation factor 1-alpha 1 OS=Mus musculus OX=10090 GN=Eef1a1 PE=1 SV=3	Eef1a1
FAPVNVTTEVK	11	H-2-Db	SB	57.34	PD Mascot	Control	900000	Control_1_1c	P10126	279_289	Elongation factor 1-alpha 1 OS=Mus musculus OX=10090 GN=Eef1a1 PE=1 SV=3	Eef1a1
FAPVNVTTEVK	11	H-2-Db	SB	57.34	PD Mascot	TG	7600000	TG_1c	P10126	279_289	Elongation factor 1-alpha 1 OS=Mus musculus OX=10090 GN=Eef1a1 PE=1 SV=3	Eef1a1
FAPVNVTTEVK	11	H-2-Db	SB	57.34	PD Sequest	HG	8200000	HG_2b	P10126	279_289	Elongation factor 1-alpha 1 OS=Mus musculus OX=10090 GN=Eef1a1 PE=1 SV=3	Eef1a1
FAPVNVTTEVK	11	H-2-Db	SB	57.34	Maxquant	HG	3167100	HG_2c	P10126	279_289	Elongation factor 1-alpha 1 OS=Mus musculus OX=10090 GN=Eef1a1 PE=1 SV=3	Eef1a1
FAPVNVTTEVK	11	H-2-Db	SB	57.34	PD Mascot	TG	8900000	TG_1b	P10126	279_289	Elongation factor 1-alpha 1 OS=Mus musculus OX=10090 GN=Eef1a1 PE=1 SV=3	Eef1a1
FAPVNVTTEVK	11	H-2-Db	SB	57.34	Maxquant	TG	1333600	TG_2b	P10126	279_289	Elongation factor 1-alpha 1 OS=Mus musculus OX=10090 GN=Eef1a1 PE=1 SV=3	Eef1a1
FAPVNVTTEVK	11	H-2-Db	SB	57.34	Maxquant	Control	502980	Control_1_2b	P10126	279_289	Elongation factor 1-alpha 1 OS=Mus musculus OX=10090 GN=Eef1a1 PE=1 SV=3	Eef1a1
FAPVNVTTEVK	11	H-2-Db	SB	57.34	Maxquant	TG	6112000	TG_1b	P10126	279_289	Elongation factor 1-alpha 1 OS=Mus musculus OX=10090 GN=Eef1a1 PE=1 SV=3	Eef1a1
FAPVNVTTEVK	11	H-2-Db	SB	57.34	Maxquant	Control	3870100	Control_1_1a	P10126	279_289	Elongation factor 1-alpha 1 OS=Mus musculus OX=10090 GN=Eef1a1 PE=1 SV=3	Eef1a1
FAPVNVTTEVK	11	H-2-Db	SB	57.34	Maxquant	TG	6082500	TG_1a	P10126	279_289	Elongation factor 1-alpha 1 OS=Mus musculus OX=10090 GN=Eef1a1 PE=1 SV=3	Eef1a1
FAPVNVTTEVK	11	H-2-Db	SB	57.34	PD Sequest	TG	8900000	TG_1b	P10126	279_289	Elongation factor 1-alpha 1 OS=Mus musculus OX=10090 GN=Eef1a1 PE=1 SV=3	Eef1a1
FAPVNVTTEVK	11	H-2-Db	SB	57.34	PD Sequest	Control	900000	Control_1_1c	P10126	279_289	Elongation factor 1-alpha 1 OS=Mus musculus OX=10090 GN=Eef1a1 PE=1 SV=3	Eef1a1
FAPVNVTTEVK	11	H-2-Db	SB	57.34	Maxquant	HG	3128900	HG_2b	P10126	279_289	Elongation factor 1-alpha 1 OS=Mus musculus OX=10090 GN=Eef1a1 PE=1 SV=3	Eef1a1
FAPVNVTTEVK	11	H-2-Db	SB	57.34	Maxquant	HG	5281500	HG_2a	P10126	279_289	Elongation factor 1-alpha 1 OS=Mus musculus OX=10090 GN=Eef1a1 PE=1 SV=3	Eef1a1
FAPVNVTTEVK	11	H-2-Db	SB	57.34	PD Sequest	HG	8600000	HG_2a	P10126	279_289	Elongation factor 1-alpha 1 OS=Mus musculus OX=10090 GN=Eef1a1 PE=1 SV=3	Eef1a1
FAPVNVTTEVK	11	H-2-Db	SB	57.34	PD Mascot	TG	7300000	TG_1a	P10126	279_289	Elongation factor 1-alpha 1 OS=Mus musculus OX=10090 GN=Eef1a1 PE=1 SV=3	Eef1a1
FAPVNVTTEVK	11	H-2-Db	SB	57.34	PD Mascot	HG	8200000	HG_2b	P10126	279_289	Elongation factor 1-alpha 1 OS=Mus musculus OX=10090 GN=Eef1a1 PE=1 SV=3	Eef1a1
FAPVNVTTEVK	11	H-2-Db	SB	57.34	PD Sequest	HG	6900000	HG_2c	P10126	279_289	Elongation factor 1-alpha 1 OS=Mus musculus OX=10090 GN=Eef1a1 PE=1 SV=3	Eef1a1
FAPVNVTTEVK	11	H-2-Db	SB	57.34	PD Sequest	Control	4300000	Control_1_1b	P10126	279_289	Elongation factor 1-alpha 1 OS=Mus musculus OX=10090 GN=Eef1a1 PE=1 SV=3	Eef1a1
FAPVNVTTEVK	11	H-2-Db	SB	57.34	Maxquant	Control	2380400	Control_1_1b	P10126	279_289	Elongation factor 1-alpha 1 OS=Mus musculus OX=10090 GN=Eef1a1 PE=1 SV=3	Eef1a1
FAPVNVTTEVK	11	H-2-Db	SB	57.34	Maxquant	TG	4483600	TG_1c	P10126	279_289	Elongation factor 1-alpha 1 OS=Mus musculus OX=10090 GN=Eef1a1 PE=1 SV=3	Eef1a1
FAPVNVTTEVK	11	H-2-Db	SB	57.34	Maxquant	TG	1231500	TG_2a	P10126	279_289	Elongation factor 1-alpha 1 OS=Mus musculus OX=10090 GN=Eef1a1 PE=1 SV=3	Eef1a1
FAPVNVTTEVK	11	H-2-Db	SB	57.34	Maxquant	TG	1238900	TG_2c	P10126	279_289	Elongation factor 1-alpha 1 OS=Mus musculus OX=10090 GN=Eef1a1 PE=1 SV=3	Eef1a1
FAPVNVTTEVK	11	H-2-Db	SB	57.34	PD Mascot	HG	6900000	HG_2c	P10126	279_289	Elongation factor 1-alpha 1 OS=Mus musculus OX=10090 GN=Eef1a1 PE=1 SV=3	Eef1a1
FAPVNVTTEVK	11	H-2-Db	SB	57.34	PD Sequest	TG	7300000	TG_1a	P10126	279_289	Elongation factor 1-alpha 1 OS=Mus musculus OX=10090 GN=Eef1a1 PE=1 SV=3	Eef1a1
FAPVNVTTEVK	11	H-2-Db	SB	57.34	Maxquant	Control	1630100	Control_1_1c	P10126	279_289	Elongation factor 1-alpha 1 OS=Mus musculus OX=10090 GN=Eef1a1 PE=1 SV=3	Eef1a1
FAPVNVTTEVK	11	H-2-Db	SB	57.34	PD Sequest	TG	7600000	TG_1c	P10126	279_289	Elongation factor 1-alpha 1 OS=Mus musculus OX=10090 GN=Eef1a1 PE=1 SV=3	Eef1a1
FAPVNVTTEVK	11	H-2-Db	SB	57.34	PD Mascot	Control	4300000	Control_1_1b	P10126	279_289	Elongation factor 1-alpha 1 OS=Mus musculus OX=10090 GN=Eef1a1 PE=1 SV=3	Eef1a1
FAPVNVTTEVK	11	H-2-Db	SB	57.34	PD Mascot	Control	4100000	Control_1_1a	P10126	279_289	Elongation factor 1-alpha 1 OS=Mus musculus OX=10090 GN=Eef1a1 PE=1 SV=3	Eef1a1
FHDLDMLTTVQ	11	H-2-Kd	WB	979.28	PD Mascot	HG	3800000	HG_2c	Q9EP89	354_364	Serine beta-lactamase-like protein LACTB, mitochondrial OS=Mus musculus OX=10090 GN=Lactb PE=1 SV=1	Lactb
FHDLDMLTTVQ	11	H-2-Kd	WB	979.28	PD Mascot	HG	2700000	HG_1c	Q9EP89	354_364	Serine beta-lactamase-like protein LACTB, mitochondrial OS=Mus musculus OX=10090 GN=Lactb PE=1 SV=1	Lactb
FLLEFQDFHL	10	H-2-Db	WB	4058.69	PD Sequest	HG	4700000	HG_2b	Q9JLB4	1202_1211	Cubilin OS=Mus musculus OX=10090 GN=Cubn PE=1 SV=3	Cubn
FLLEFQDFHL	10	H-2-Db	WB	4058.69	PD Sequest	HG	4600000	HG_2a	Q9JLB4	1202_1211	Cubilin OS=Mus musculus OX=10090 GN=Cubn PE=1 SV=3	Cubn
FLLEFQDFHL	10	H-2-Db	WB	4058.69	PD Sequest	TG	13000000	TG_1a	Q9JLB4	1202_1211	Cubilin OS=Mus musculus OX=10090 GN=Cubn PE=1 SV=3	Cubn
FLLEFQDFHL	10	H-2-Db	WB	4058.69	PD Sequest	HG	9400000	HG_1b	Q9JLB4	1202_1211	Cubilin OS=Mus musculus OX=10090 GN=Cubn PE=1 SV=3	Cubn
FLLEFQDFHL	10	H-2-Db	WB	4058.69	PD Sequest	TG	12000000	TG_1b	Q9JLB4	1202_1211	Cubilin OS=Mus musculus OX=10090 GN=Cubn PE=1 SV=3	Cubn
FLLEFQDFHL	10	H-2-Db	WB	4058.69	PD Sequest	TG	13000000	TG_1c	Q9JLB4	1202_1211	Cubilin OS=Mus musculus OX=10090 GN=Cubn PE=1 SV=3	Cubn
FLLEFQDFHL	10	H-2-Db	WB	4058.69	PD Sequest	HG	8300000	HG_1c	Q9JLB4	1202_1211	Cubilin OS=Mus musculus OX=10090 GN=Cubn PE=1 SV=3	Cubn
FLLEFQDFHL	10	H-2-Db	WB	4058.69	PD Sequest	HG	9000000	HG_1a	Q9JLB4	1202_1211	Cubilin OS=Mus musculus OX=10090 GN=Cubn PE=1 SV=3	Cubn
FLLEFQDFHL	10	H-2-Db	WB	4058.69	PD Sequest	HG	5200000	HG_2c	Q9JLB4	1202_1211	Cubilin OS=Mus musculus OX=10090 GN=Cubn PE=1 SV=3	Cubn
FNLLDCLLPVI	11	H-2-Db	WB	6783.16	PD Mascot	HG	6800000	HG_1a	Q80TY5	655_665	Vacuolar protein sorting-associated protein 13B OS=Mus musculus OX=10090 GN=Vps13b PE=1 SV=3	Vps13b
FNLLDCLLPVI	11	H-2-Db	WB	6783.16	PD Mascot	HG	5500000	HG_1b	Q80TY5	655_665	Vacuolar protein sorting-associated protein 13B OS=Mus musculus OX=10090 GN=Vps13b PE=1 SV=3	Vps13b
FNLLDCLLPVI	11	H-2-Db	WB	6783.16	PD Mascot	HG	5000000	HG_1c	Q80TY5	655_665	Vacuolar protein sorting-associated protein 13B OS=Mus musculus OX=10090 GN=Vps13b PE=1 SV=3	Vps13b
FQGFSRMSSEI	11	H-2-Kd	WB	891.16	PD Mascot	TG	3600000	TG_1a	B2RR83	1356_1366	3'-5' RNA helicase YTHDC2 OS=Mus musculus OX=10090 GN=Ythdc2 PE=1 SV=1	Ythdc2
FQIVNPHLL	9	H-2-Db	SB	7.6	PD Mascot	TG	18000000	TG_1b	P07742	633_641	Ribonucleoside-diphosphate reductase large subunit OS=Mus musculus OX=10090 GN=Rrm1 PE=1 SV=2	Rrm1
FQIVNPHLL	9	H-2-Db	SB	7.6	PD Mascot	TG	18000000	TG_1c	P07742	633_641	Ribonucleoside-diphosphate reductase large subunit OS=Mus musculus OX=10090 GN=Rrm1 PE=1 SV=2	Rrm1
FQIVNPHLL	9	H-2-Db	SB	7.6	PD Mascot	TG	19000000	TG_1a	P07742	633_641	Ribonucleoside-diphosphate reductase large subunit OS=Mus musculus OX=10090 GN=Rrm1 PE=1 SV=2	Rrm1
FQYTDKHGEV	10	H-2-Db	WB	6682.49	PD Mascot	Control	2700000	Control_1_1a	O08807	237_246	Peroxiredoxin-4 OS=Mus musculus OX=10090 GN=Prdx4 PE=1 SV=1	Prdx4
FQYTDKHGEV	10	H-2-Db	WB	6682.49	PD Mascot	Control	3000000	Control_1_1c	O08807	237_246	Peroxiredoxin-4 OS=Mus musculus OX=10090 GN=Prdx4 PE=1 SV=1	Prdx4
FQYTDKHGEV	10	H-2-Db	WB	6682.49	PD Mascot	HG	1500000	HG_1b	O08807	237_246	Peroxiredoxin-4 OS=Mus musculus OX=10090 GN=Prdx4 PE=1 SV=1	Prdx4
FQYTDKHGEV	10	H-2-Db	WB	6682.49	PD Mascot	Control	2600000	Control_1_1b	O08807	237_246	Peroxiredoxin-4 OS=Mus musculus OX=10090 GN=Prdx4 PE=1 SV=1	Prdx4
FSISDGIYG	9	H-2-Db	WB	6339.69	Maxquant	TG	11819000	TG_2c	P00416	185_193	Cytochrome c oxidase subunit 3 OS=Mus musculus OX=10090 GN=mt-Co3 PE=1 SV=2	mt-Co3
FSISDGIYG	9	H-2-Db	WB	6339.69	Maxquant	TG	15845000	TG_2b	P00416	185_193	Cytochrome c oxidase subunit 3 OS=Mus musculus OX=10090 GN=mt-Co3 PE=1 SV=2	mt-Co3
FSISDGIYG	9	H-2-Db	WB	6339.69	Maxquant	Control	1697200	Control_1_2a	P00416	185_193	Cytochrome c oxidase subunit 3 OS=Mus musculus OX=10090 GN=mt-Co3 PE=1 SV=2	mt-Co3
FSISDGIYG	9	H-2-Db	WB	6339.69	Maxquant	TG	17846000	TG_1b	P00416	185_193	Cytochrome c oxidase subunit 3 OS=Mus musculus OX=10090 GN=mt-Co3 PE=1 SV=2	mt-Co3
FSISDGIYG	9	H-2-Db	WB	6339.69	Maxquant	TG	13820000	TG_2a	P00416	185_193	Cytochrome c oxidase subunit 3 OS=Mus musculus OX=10090 GN=mt-Co3 PE=1 SV=2	mt-Co3
FSISDGIYG	9	H-2-Db	WB	6339.69	Maxquant	HG	15121000	HG_2c	P00416	185_193	Cytochrome c oxidase subunit 3 OS=Mus musculus OX=10090 GN=mt-Co3 PE=1 SV=2	mt-Co3
FSISDGIYG	9	H-2-Db	WB	6339.69	Maxquant	HG	11732000	HG_2a	P00416	185_193	Cytochrome c oxidase subunit 3 OS=Mus musculus OX=10090 GN=mt-Co3 PE=1 SV=2	mt-Co3
FSISDGIYG	9	H-2-Db	WB	6339.69	Maxquant	Control	1042600	Control_1_2c	P00416	185_193	Cytochrome c oxidase subunit 3 OS=Mus musculus OX=10090 GN=mt-Co3 PE=1 SV=2	mt-Co3
FSISDGIYG	9	H-2-Db	WB	6339.69	Maxquant	HG	10897000	HG_2b	P00416	185_193	Cytochrome c oxidase subunit 3 OS=Mus musculus OX=10090 GN=mt-Co3 PE=1 SV=2	mt-Co3
FSISDGIYG	9	H-2-Db	WB	6339.69	Maxquant	Control	1778000	Control_1_2b	P00416	185_193	Cytochrome c oxidase subunit 3 OS=Mus musculus OX=10090 GN=mt-Co3 PE=1 SV=2	mt-Co3
FVICLKPMELI	11	H-2-Db	WB	7384.14	PD Mascot	TG	2000000	TG_2a	Q91VB4	249_259	Hermansky-Pudlak syndrome 3 protein homolog OS=Mus musculus OX=10090 GN=Hps3 PE=2 SV=2	Hps3
FYEPQKGSI	9	H-2-Kd	SB	28.05	Maxquant	TG	4225600	TG_1a	Q61102	520_528	ATP-binding cassette sub-family B member 7, mitochondrial OS=Mus musculus OX=10090 GN=Abcb7 PE=1 SV=3	Abcb7
FYEPQKGSI	9	H-2-Kd	SB	28.05	Maxquant	HG	1401400	HG_2c	Q61102	520_528	ATP-binding cassette sub-family B member 7, mitochondrial OS=Mus musculus OX=10090 GN=Abcb7 PE=1 SV=3	Abcb7
FYEPQKGSI	9	H-2-Kd	SB	28.05	Maxquant	Control	1681000	Control_1_1b	Q61102	520_528	ATP-binding cassette sub-family B member 7, mitochondrial OS=Mus musculus OX=10090 GN=Abcb7 PE=1 SV=3	Abcb7
FYEPQKGSI	9	H-2-Kd	SB	28.05	Maxquant	TG	1736400	TG_2a	Q61102	520_528	ATP-binding cassette sub-family B member 7, mitochondrial OS=Mus musculus OX=10090 GN=Abcb7 PE=1 SV=3	Abcb7
FYEPQKGSI	9	H-2-Kd	SB	28.05	Maxquant	TG	1330900	TG_2b	Q61102	520_528	ATP-binding cassette sub-family B member 7, mitochondrial OS=Mus musculus OX=10090 GN=Abcb7 PE=1 SV=3	Abcb7
FYEPQKGSI	9	H-2-Kd	SB	28.05	Maxquant	HG	1429900	HG_2b	Q61102	520_528	ATP-binding cassette sub-family B member 7, mitochondrial OS=Mus musculus OX=10090 GN=Abcb7 PE=1 SV=3	Abcb7
FYEPQKGSI	9	H-2-Kd	SB	28.05	Maxquant	Control	2059500	Control_1_1a	Q61102	520_528	ATP-binding cassette sub-family B member 7, mitochondrial OS=Mus musculus OX=10090 GN=Abcb7 PE=1 SV=3	Abcb7
FYEPQKGSI	9	H-2-Kd	SB	28.05	Maxquant	TG	3295200	TG_1c	Q61102	520_528	ATP-binding cassette sub-family B member 7, mitochondrial OS=Mus musculus OX=10090 GN=Abcb7 PE=1 SV=3	Abcb7
FYEPQKGSI	9	H-2-Kd	SB	28.05	Maxquant	HG	1673100	HG_2a	Q61102	520_528	ATP-binding cassette sub-family B member 7, mitochondrial OS=Mus musculus OX=10090 GN=Abcb7 PE=1 SV=3	Abcb7
FYEPQKGSI	9	H-2-Kd	SB	28.05	Maxquant	TG	2793400	TG_1b	Q61102	520_528	ATP-binding cassette sub-family B member 7, mitochondrial OS=Mus musculus OX=10090 GN=Abcb7 PE=1 SV=3	Abcb7
FYEPQKGSI	9	H-2-Kd	SB	28.05	Maxquant	Control	1744200	Control_1_1c	Q61102	520_528	ATP-binding cassette sub-family B member 7, mitochondrial OS=Mus musculus OX=10090 GN=Abcb7 PE=1 SV=3	Abcb7
FYGDVQTHI	9	H-2-Kd	SB	29.58	PD Mascot	TG	5100000	TG_1c	Q6ZPE2	685_693	Myotubularin-related protein 5 OS=Mus musculus OX=10090 GN=Sbf1 PE=1 SV=2	Sbf1
FYGDVQTHI	9	H-2-Kd	SB	29.58	Maxquant	HG	780830	HG_2c	Q6ZPE2	685_693	Myotubularin-related protein 5 OS=Mus musculus OX=10090 GN=Sbf1 PE=1 SV=2	Sbf1
FYGDVQTHI	9	H-2-Kd	SB	29.58	Maxquant	Control	311920	Control_1_1b	Q6ZPE2	685_693	Myotubularin-related protein 5 OS=Mus musculus OX=10090 GN=Sbf1 PE=1 SV=2	Sbf1
FYGDVQTHI	9	H-2-Kd	SB	29.58	Maxquant	TG	2158800	TG_1a	Q6ZPE2	685_693	Myotubularin-related protein 5 OS=Mus musculus OX=10090 GN=Sbf1 PE=1 SV=2	Sbf1
FYGDVQTHI	9	H-2-Kd	SB	29.58	Maxquant	TG	2136200	TG_1c	Q6ZPE2	685_693	Myotubularin-related protein 5 OS=Mus musculus OX=10090 GN=Sbf1 PE=1 SV=2	Sbf1
FYGDVQTHI	9	H-2-Kd	SB	29.58	Maxquant	TG	1759600	TG_1b	Q6ZPE2	685_693	Myotubularin-related protein 5 OS=Mus musculus OX=10090 GN=Sbf1 PE=1 SV=2	Sbf1
FYGDVQTHI	9	H-2-Kd	SB	29.58	PD Mascot	TG	4400000	TG_1a	Q6ZPE2	685_693	Myotubularin-related protein 5 OS=Mus musculus OX=10090 GN=Sbf1 PE=1 SV=2	Sbf1
FYIGLGSRI	9	H-2-Kd	SB	16.01	PD Mascot	TG	8500000	TG_1b	Q7M759	109_117	Alpha/beta hydrolase domain-containing protein 17B OS=Mus musculus OX=10090 GN=Abhd17b PE=1 SV=1	Abhd17b
FYRQVSTSL	9	H-2-Kd	SB	15.11	PD Mascot	TG	3400000	TG_1a	Q8CGN4	1700_1708	BCL-6 corepressor OS=Mus musculus OX=10090 GN=Bcor PE=1 SV=2	Bcor
FYSQPHPNTI	10	H-2-Kd	SB	119.51	PD Sequest	TG	58000000	TG_1b	O70166	24_33	Stathmin-3 OS=Mus musculus OX=10090 GN=Stmn3 PE=1 SV=1	Stmn3
FYSQPHPNTI	10	H-2-Kd	SB	119.51	Maxquant	HG	16354000	HG_2a	O70166	24_33	Stathmin-3 OS=Mus musculus OX=10090 GN=Stmn3 PE=1 SV=1	Stmn3
FYSQPHPNTI	10	H-2-Kd	SB	119.51	Maxquant	HG	3311500	HG_1b	O70166	24_33	Stathmin-3 OS=Mus musculus OX=10090 GN=Stmn3 PE=1 SV=1	Stmn3
FYSQPHPNTI	10	H-2-Kd	SB	119.51	PD Mascot	TG	60000000	TG_1a	O70166	24_33	Stathmin-3 OS=Mus musculus OX=10090 GN=Stmn3 PE=1 SV=1	Stmn3
FYSQPHPNTI	10	H-2-Kd	SB	119.51	PD Sequest	Control	41000000	Control_1_1b	O70166	24_33	Stathmin-3 OS=Mus musculus OX=10090 GN=Stmn3 PE=1 SV=1	Stmn3
FYSQPHPNTI	10	H-2-Kd	SB	119.51	Maxquant	Control	15697000	Control_1_1b	O70166	24_33	Stathmin-3 OS=Mus musculus OX=10090 GN=Stmn3 PE=1 SV=1	Stmn3
FYSQPHPNTI	10	H-2-Kd	SB	119.51	PD Mascot	HG	4000000	HG_1a	O70166	24_33	Stathmin-3 OS=Mus musculus OX=10090 GN=Stmn3 PE=1 SV=1	Stmn3
FYSQPHPNTI	10	H-2-Kd	SB	119.51	PD Sequest	HG	33000000	HG_2a	O70166	24_33	Stathmin-3 OS=Mus musculus OX=10090 GN=Stmn3 PE=1 SV=1	Stmn3
FYSQPHPNTI	10	H-2-Kd	SB	119.51	PD Mascot	TG	6400000	TG_2a	O70166	24_33	Stathmin-3 OS=Mus musculus OX=10090 GN=Stmn3 PE=1 SV=1	Stmn3
FYSQPHPNTI	10	H-2-Kd	SB	119.51	PD Sequest	TG	6200000	TG_2c	O70166	24_33	Stathmin-3 OS=Mus musculus OX=10090 GN=Stmn3 PE=1 SV=1	Stmn3
FYSQPHPNTI	10	H-2-Kd	SB	119.51	Maxquant	HG	2144200	HG_1c	O70166	24_33	Stathmin-3 OS=Mus musculus OX=10090 GN=Stmn3 PE=1 SV=1	Stmn3
FYSQPHPNTI	10	H-2-Kd	SB	119.51	PD Mascot	HG	5300000	HG_1b	O70166	24_33	Stathmin-3 OS=Mus musculus OX=10090 GN=Stmn3 PE=1 SV=1	Stmn3
FYSQPHPNTI	10	H-2-Kd	SB	119.51	Maxquant	TG	3053700	TG_2c	O70166	24_33	Stathmin-3 OS=Mus musculus OX=10090 GN=Stmn3 PE=1 SV=1	Stmn3
FYSQPHPNTI	10	H-2-Kd	SB	119.51	PD Mascot	Control	43000000	Control_1_1a	O70166	24_33	Stathmin-3 OS=Mus musculus OX=10090 GN=Stmn3 PE=1 SV=1	Stmn3
FYSQPHPNTI	10	H-2-Kd	SB	119.51	PD Mascot	HG	33000000	HG_2c	O70166	24_33	Stathmin-3 OS=Mus musculus OX=10090 GN=Stmn3 PE=1 SV=1	Stmn3
FYSQPHPNTI	10	H-2-Kd	SB	119.51	PD Sequest	HG	4000000	HG_1a	O70166	24_33	Stathmin-3 OS=Mus musculus OX=10090 GN=Stmn3 PE=1 SV=1	Stmn3
FYSQPHPNTI	10	H-2-Kd	SB	119.51	Maxquant	TG	30169000	TG_1a	O70166	24_33	Stathmin-3 OS=Mus musculus OX=10090 GN=Stmn3 PE=1 SV=1	Stmn3
FYSQPHPNTI	10	H-2-Kd	SB	119.51	PD Mascot	TG	6000000	TG_2b	O70166	24_33	Stathmin-3 OS=Mus musculus OX=10090 GN=Stmn3 PE=1 SV=1	Stmn3
FYSQPHPNTI	10	H-2-Kd	SB	119.51	PD Sequest	Control	45000000	Control_1_1c	O70166	24_33	Stathmin-3 OS=Mus musculus OX=10090 GN=Stmn3 PE=1 SV=1	Stmn3
FYSQPHPNTI	10	H-2-Kd	SB	119.51	Maxquant	HG	2259300	HG_1a	O70166	24_33	Stathmin-3 OS=Mus musculus OX=10090 GN=Stmn3 PE=1 SV=1	Stmn3
FYSQPHPNTI	10	H-2-Kd	SB	119.51	PD Sequest	TG	60000000	TG_1a	O70166	24_33	Stathmin-3 OS=Mus musculus OX=10090 GN=Stmn3 PE=1 SV=1	Stmn3
FYSQPHPNTI	10	H-2-Kd	SB	119.51	Maxquant	Control	18793000	Control_1_1a	O70166	24_33	Stathmin-3 OS=Mus musculus OX=10090 GN=Stmn3 PE=1 SV=1	Stmn3
FYSQPHPNTI	10	H-2-Kd	SB	119.51	PD Sequest	TG	6400000	TG_2a	O70166	24_33	Stathmin-3 OS=Mus musculus OX=10090 GN=Stmn3 PE=1 SV=1	Stmn3
FYSQPHPNTI	10	H-2-Kd	SB	119.51	PD Mascot	Control	1100000	Control_1_2c	O70166	24_33	Stathmin-3 OS=Mus musculus OX=10090 GN=Stmn3 PE=1 SV=1	Stmn3
FYSQPHPNTI	10	H-2-Kd	SB	119.51	PD Mascot	Control	41000000	Control_1_1b	O70166	24_33	Stathmin-3 OS=Mus musculus OX=10090 GN=Stmn3 PE=1 SV=1	Stmn3
FYSQPHPNTI	10	H-2-Kd	SB	119.51	PD Sequest	TG	6000000	TG_2b	O70166	24_33	Stathmin-3 OS=Mus musculus OX=10090 GN=Stmn3 PE=1 SV=1	Stmn3
FYSQPHPNTI	10	H-2-Kd	SB	119.51	Maxquant	TG	22794000	TG_1c	O70166	24_33	Stathmin-3 OS=Mus musculus OX=10090 GN=Stmn3 PE=1 SV=1	Stmn3
FYSQPHPNTI	10	H-2-Kd	SB	119.51	PD Sequest	Control	43000000	Control_1_1a	O70166	24_33	Stathmin-3 OS=Mus musculus OX=10090 GN=Stmn3 PE=1 SV=1	Stmn3
FYSQPHPNTI	10	H-2-Kd	SB	119.51	PD Sequest	HG	3600000	HG_1c	O70166	24_33	Stathmin-3 OS=Mus musculus OX=10090 GN=Stmn3 PE=1 SV=1	Stmn3
FYSQPHPNTI	10	H-2-Kd	SB	119.51	PD Mascot	TG	58000000	TG_1b	O70166	24_33	Stathmin-3 OS=Mus musculus OX=10090 GN=Stmn3 PE=1 SV=1	Stmn3
FYSQPHPNTI	10	H-2-Kd	SB	119.51	PD Mascot	TG	6200000	TG_2c	O70166	24_33	Stathmin-3 OS=Mus musculus OX=10090 GN=Stmn3 PE=1 SV=1	Stmn3
FYSQPHPNTI	10	H-2-Kd	SB	119.51	Maxquant	Control	21425000	Control_1_1c	O70166	24_33	Stathmin-3 OS=Mus musculus OX=10090 GN=Stmn3 PE=1 SV=1	Stmn3
FYSQPHPNTI	10	H-2-Kd	SB	119.51	PD Mascot	HG	3600000	HG_1c	O70166	24_33	Stathmin-3 OS=Mus musculus OX=10090 GN=Stmn3 PE=1 SV=1	Stmn3
FYSQPHPNTI	10	H-2-Kd	SB	119.51	Maxquant	HG	12238000	HG_2b	O70166	24_33	Stathmin-3 OS=Mus musculus OX=10090 GN=Stmn3 PE=1 SV=1	Stmn3
FYSQPHPNTI	10	H-2-Kd	SB	119.51	PD Sequest	HG	33000000	HG_2c	O70166	24_33	Stathmin-3 OS=Mus musculus OX=10090 GN=Stmn3 PE=1 SV=1	Stmn3
FYSQPHPNTI	10	H-2-Kd	SB	119.51	Maxquant	TG	26503000	TG_1b	O70166	24_33	Stathmin-3 OS=Mus musculus OX=10090 GN=Stmn3 PE=1 SV=1	Stmn3
FYSQPHPNTI	10	H-2-Kd	SB	119.51	PD Sequest	Control	2700000	Control_1_2a	O70166	24_33	Stathmin-3 OS=Mus musculus OX=10090 GN=Stmn3 PE=1 SV=1	Stmn3
FYSQPHPNTI	10	H-2-Kd	SB	119.51	Maxquant	HG	13349000	HG_2c	O70166	24_33	Stathmin-3 OS=Mus musculus OX=10090 GN=Stmn3 PE=1 SV=1	Stmn3
FYSQPHPNTI	10	H-2-Kd	SB	119.51	PD Sequest	HG	5300000	HG_1b	O70166	24_33	Stathmin-3 OS=Mus musculus OX=10090 GN=Stmn3 PE=1 SV=1	Stmn3
FYSQPHPNTI	10	H-2-Kd	SB	119.51	PD Sequest	Control	1100000	Control_1_2c	O70166	24_33	Stathmin-3 OS=Mus musculus OX=10090 GN=Stmn3 PE=1 SV=1	Stmn3
FYSQPHPNTI	10	H-2-Kd	SB	119.51	PD Mascot	Control	2700000	Control_1_2a	O70166	24_33	Stathmin-3 OS=Mus musculus OX=10090 GN=Stmn3 PE=1 SV=1	Stmn3
FYSQPHPNTI	10	H-2-Kd	SB	119.51	PD Mascot	HG	33000000	HG_2a	O70166	24_33	Stathmin-3 OS=Mus musculus OX=10090 GN=Stmn3 PE=1 SV=1	Stmn3
FYSQPHPNTI	10	H-2-Kd	SB	119.51	PD Mascot	Control	45000000	Control_1_1c	O70166	24_33	Stathmin-3 OS=Mus musculus OX=10090 GN=Stmn3 PE=1 SV=1	Stmn3
FYTRAASTA	9	H-2-Kd	SB	27.94	Maxquant	TG	3871600	TG_1b	Q9CZX8	52_60	40S ribosomal protein S19 OS=Mus musculus OX=10090 GN=Rps19 PE=1 SV=3	Rps19
FYTRAASTA	9	H-2-Kd	SB	27.94	Maxquant	HG	862650	HG_2c	Q9CZX8	52_60	40S ribosomal protein S19 OS=Mus musculus OX=10090 GN=Rps19 PE=1 SV=3	Rps19
FYTRAASTA	9	H-2-Kd	SB	27.94	Maxquant	HG	826880	HG_2a	Q9CZX8	52_60	40S ribosomal protein S19 OS=Mus musculus OX=10090 GN=Rps19 PE=1 SV=3	Rps19
FYTRAASTA	9	H-2-Kd	SB	27.94	Maxquant	Control	8629300	Control_1_1a	Q9CZX8	52_60	40S ribosomal protein S19 OS=Mus musculus OX=10090 GN=Rps19 PE=1 SV=3	Rps19
FYTRAASTA	9	H-2-Kd	SB	27.94	Maxquant	TG	1688100	TG_1a	Q9CZX8	52_60	40S ribosomal protein S19 OS=Mus musculus OX=10090 GN=Rps19 PE=1 SV=3	Rps19
FYTRAASTA	9	H-2-Kd	SB	27.94	Maxquant	Control	8209600	Control_1_1b	Q9CZX8	52_60	40S ribosomal protein S19 OS=Mus musculus OX=10090 GN=Rps19 PE=1 SV=3	Rps19
FYTRAASTA	9	H-2-Kd	SB	27.94	Maxquant	HG	12733000	HG_1c	Q9CZX8	52_60	40S ribosomal protein S19 OS=Mus musculus OX=10090 GN=Rps19 PE=1 SV=3	Rps19
FYTRAASTA	9	H-2-Kd	SB	27.94	PD Mascot	HG	20000000	HG_1b	Q9CZX8	52_60	40S ribosomal protein S19 OS=Mus musculus OX=10090 GN=Rps19 PE=1 SV=3	Rps19
FYTRAASTA	9	H-2-Kd	SB	27.94	PD Mascot	Control	17000000	Control_1_1c	Q9CZX8	52_60	40S ribosomal protein S19 OS=Mus musculus OX=10090 GN=Rps19 PE=1 SV=3	Rps19
FYTRAASTA	9	H-2-Kd	SB	27.94	Maxquant	TG	1883200	TG_2b	Q9CZX8	52_60	40S ribosomal protein S19 OS=Mus musculus OX=10090 GN=Rps19 PE=1 SV=3	Rps19
FYTRAASTA	9	H-2-Kd	SB	27.94	Maxquant	HG	11116000	HG_1a	Q9CZX8	52_60	40S ribosomal protein S19 OS=Mus musculus OX=10090 GN=Rps19 PE=1 SV=3	Rps19
FYTRAASTA	9	H-2-Kd	SB	27.94	PD Mascot	TG	3400000	TG_2a	Q9CZX8	52_60	40S ribosomal protein S19 OS=Mus musculus OX=10090 GN=Rps19 PE=1 SV=3	Rps19
FYTRAASTA	9	H-2-Kd	SB	27.94	Maxquant	HG	10307000	HG_1b	Q9CZX8	52_60	40S ribosomal protein S19 OS=Mus musculus OX=10090 GN=Rps19 PE=1 SV=3	Rps19
FYTRAASTA	9	H-2-Kd	SB	27.94	PD Mascot	Control	17000000	Control_1_1b	Q9CZX8	52_60	40S ribosomal protein S19 OS=Mus musculus OX=10090 GN=Rps19 PE=1 SV=3	Rps19
FYTRAASTA	9	H-2-Kd	SB	27.94	PD Mascot	TG	3000000	TG_1a	Q9CZX8	52_60	40S ribosomal protein S19 OS=Mus musculus OX=10090 GN=Rps19 PE=1 SV=3	Rps19
FYTRAASTA	9	H-2-Kd	SB	27.94	PD Mascot	TG	3600000	TG_2c	Q9CZX8	52_60	40S ribosomal protein S19 OS=Mus musculus OX=10090 GN=Rps19 PE=1 SV=3	Rps19
FYTRAASTA	9	H-2-Kd	SB	27.94	Maxquant	Control	1364400	Control_1_2c	Q9CZX8	52_60	40S ribosomal protein S19 OS=Mus musculus OX=10090 GN=Rps19 PE=1 SV=3	Rps19
FYTRAASTA	9	H-2-Kd	SB	27.94	Maxquant	Control	8953400	Control_1_1c	Q9CZX8	52_60	40S ribosomal protein S19 OS=Mus musculus OX=10090 GN=Rps19 PE=1 SV=3	Rps19
FYTRAASTA	9	H-2-Kd	SB	27.94	Maxquant	TG	1862200	TG_2a	Q9CZX8	52_60	40S ribosomal protein S19 OS=Mus musculus OX=10090 GN=Rps19 PE=1 SV=3	Rps19
FYTRAASTA	9	H-2-Kd	SB	27.94	Maxquant	HG	977830	HG_2b	Q9CZX8	52_60	40S ribosomal protein S19 OS=Mus musculus OX=10090 GN=Rps19 PE=1 SV=3	Rps19
FYTRAASTA	9	H-2-Kd	SB	27.94	Maxquant	TG	2086000	TG_2c	Q9CZX8	52_60	40S ribosomal protein S19 OS=Mus musculus OX=10090 GN=Rps19 PE=1 SV=3	Rps19
FYTRAASTA	9	H-2-Kd	SB	27.94	Maxquant	TG	1965400	TG_1c	Q9CZX8	52_60	40S ribosomal protein S19 OS=Mus musculus OX=10090 GN=Rps19 PE=1 SV=3	Rps19
FYTRAASTA	9	H-2-Kd	SB	27.94	PD Mascot	Control	2400000	Control_1_2a	Q9CZX8	52_60	40S ribosomal protein S19 OS=Mus musculus OX=10090 GN=Rps19 PE=1 SV=3	Rps19
FYTRAASTA	9	H-2-Kd	SB	27.94	PD Mascot	Control	2500000	Control_1_2b	Q9CZX8	52_60	40S ribosomal protein S19 OS=Mus musculus OX=10090 GN=Rps19 PE=1 SV=3	Rps19
FYTRAASTA	9	H-2-Kd	SB	27.94	Maxquant	Control	1511200	Control_1_2a	Q9CZX8	52_60	40S ribosomal protein S19 OS=Mus musculus OX=10090 GN=Rps19 PE=1 SV=3	Rps19
FYTRAASTA	9	H-2-Kd	SB	27.94	PD Mascot	TG	2900000	TG_2b	Q9CZX8	52_60	40S ribosomal protein S19 OS=Mus musculus OX=10090 GN=Rps19 PE=1 SV=3	Rps19
FYTRAASTA	9	H-2-Kd	SB	27.94	Maxquant	Control	1559900	Control_1_2b	Q9CZX8	52_60	40S ribosomal protein S19 OS=Mus musculus OX=10090 GN=Rps19 PE=1 SV=3	Rps19
FYVVGLRST	9	H-2-Kd	WB	708.61	PD Mascot	TG	3000000	TG_1b	Q640P4	81_89	Glycosyltransferase 8 domain-containing protein 2 OS=Mus musculus OX=10090 GN=Glt8d2 PE=2 SV=1	Glt8d2
FYVVGLRST	9	H-2-Kd	WB	708.61	Maxquant	TG	1570400	TG_1a	Q640P4	81_89	Glycosyltransferase 8 domain-containing protein 2 OS=Mus musculus OX=10090 GN=Glt8d2 PE=2 SV=1	Glt8d2
FYVVGLRST	9	H-2-Kd	WB	708.61	PD Mascot	TG	3700000	TG_1c	Q640P4	81_89	Glycosyltransferase 8 domain-containing protein 2 OS=Mus musculus OX=10090 GN=Glt8d2 PE=2 SV=1	Glt8d2
FYVVGLRST	9	H-2-Kd	WB	708.61	Maxquant	TG	1883300	TG_1b	Q640P4	81_89	Glycosyltransferase 8 domain-containing protein 2 OS=Mus musculus OX=10090 GN=Glt8d2 PE=2 SV=1	Glt8d2
FYVVGLRST	9	H-2-Kd	WB	708.61	Maxquant	TG	2052600	TG_1c	Q640P4	81_89	Glycosyltransferase 8 domain-containing protein 2 OS=Mus musculus OX=10090 GN=Glt8d2 PE=2 SV=1	Glt8d2
FYVVGLRST	9	H-2-Kd	WB	708.61	PD Mascot	TG	3500000	TG_1a	Q640P4	81_89	Glycosyltransferase 8 domain-containing protein 2 OS=Mus musculus OX=10090 GN=Glt8d2 PE=2 SV=1	Glt8d2
GLMTTVHAI	9	H-2-Kd	SB	628.47	PD Mascot	HG	3000000	HG_2b	P16858	170_178	Glyceraldehyde-3-phosphate dehydrogenase OS=Mus musculus OX=10090 GN=Gapdh PE=1 SV=2	Gapdh
GLMTTVHAI	9	H-2-Kd	SB	628.47	PD Mascot	HG	2600000	HG_2c	P16858	170_178	Glyceraldehyde-3-phosphate dehydrogenase OS=Mus musculus OX=10090 GN=Gapdh PE=1 SV=2	Gapdh
GSYFSQKSLAY	11	H-2-Kd	WB	1755.93	PD Mascot	TG	3300000	TG_1a	O35902	768_778	Desmoglein-3 OS=Mus musculus OX=10090 GN=Dsg3 PE=2 SV=1	Dsg3
GSYFSQKSLAY	11	H-2-Kd	WB	1755.93	PD Mascot	TG	3100000	TG_1c	O35902	768_778	Desmoglein-3 OS=Mus musculus OX=10090 GN=Dsg3 PE=2 SV=1	Dsg3
GTPVNRVPIM	10	H-2-Db	SB	201.78	PD Mascot	Control	3500000	Control_1_1b	A6PWV5	127_136	AT-rich interactive domain-containing protein 3C OS=Mus musculus OX=10090 GN=Arid3c PE=2 SV=2	Arid3c
GYERIYNEI	9	H-2-Kd	SB	54.08	PD Sequest	TG	4900000	TG_1a	Q61823	403_411	Programmed cell death protein 4 OS=Mus musculus OX=10090 GN=Pdcd4 PE=1 SV=1	Pdcd4
GYERIYNEI	9	H-2-Kd	SB	54.08	PD Sequest	TG	4500000	TG_1b	Q61823	403_411	Programmed cell death protein 4 OS=Mus musculus OX=10090 GN=Pdcd4 PE=1 SV=1	Pdcd4
GYERIYNEI	9	H-2-Kd	SB	54.08	PD Sequest	TG	2500000	TG_1c	Q61823	403_411	Programmed cell death protein 4 OS=Mus musculus OX=10090 GN=Pdcd4 PE=1 SV=1	Pdcd4
GYFEVTHDI	9	H-2-Kd	SB	56.88	Maxquant	TG	6962300	TG_1b	P24270	82_90	Catalase OS=Mus musculus OX=10090 GN=Cat PE=1 SV=4	Cat
GYFEVTHDI	9	H-2-Kd	SB	56.88	Maxquant	TG	1041400	TG_2b	P24270	82_90	Catalase OS=Mus musculus OX=10090 GN=Cat PE=1 SV=4	Cat
GYFEVTHDI	9	H-2-Kd	SB	56.88	PD Mascot	TG	15000000	TG_1a	P24270	82_90	Catalase OS=Mus musculus OX=10090 GN=Cat PE=1 SV=4	Cat
GYFEVTHDI	9	H-2-Kd	SB	56.88	Maxquant	HG	1749800	HG_2b	P24270	82_90	Catalase OS=Mus musculus OX=10090 GN=Cat PE=1 SV=4	Cat
GYFEVTHDI	9	H-2-Kd	SB	56.88	Maxquant	TG	567670	TG_1c	P24270	82_90	Catalase OS=Mus musculus OX=10090 GN=Cat PE=1 SV=4	Cat
GYFEVTHDI	9	H-2-Kd	SB	56.88	PD Mascot	TG	2300000	TG_2c	P24270	82_90	Catalase OS=Mus musculus OX=10090 GN=Cat PE=1 SV=4	Cat
GYFEVTHDI	9	H-2-Kd	SB	56.88	Maxquant	HG	2251000	HG_2c	P24270	82_90	Catalase OS=Mus musculus OX=10090 GN=Cat PE=1 SV=4	Cat
GYFEVTHDI	9	H-2-Kd	SB	56.88	Maxquant	TG	1476300	TG_2c	P24270	82_90	Catalase OS=Mus musculus OX=10090 GN=Cat PE=1 SV=4	Cat
GYFEVTHDI	9	H-2-Kd	SB	56.88	PD Mascot	HG	2300000	HG_2b	P24270	82_90	Catalase OS=Mus musculus OX=10090 GN=Cat PE=1 SV=4	Cat
GYFEVTHDI	9	H-2-Kd	SB	56.88	Maxquant	TG	7726200	TG_1a	P24270	82_90	Catalase OS=Mus musculus OX=10090 GN=Cat PE=1 SV=4	Cat
GYFEVTHDI	9	H-2-Kd	SB	56.88	PD Mascot	HG	4900000	HG_2a	P24270	82_90	Catalase OS=Mus musculus OX=10090 GN=Cat PE=1 SV=4	Cat
GYFEVTHDI	9	H-2-Kd	SB	56.88	PD Mascot	HG	4400000	HG_2c	P24270	82_90	Catalase OS=Mus musculus OX=10090 GN=Cat PE=1 SV=4	Cat
GYFEVTHDI	9	H-2-Kd	SB	56.88	Maxquant	HG	1943500	HG_2a	P24270	82_90	Catalase OS=Mus musculus OX=10090 GN=Cat PE=1 SV=4	Cat
GYFEVTHDI	9	H-2-Kd	SB	56.88	PD Mascot	TG	11000000	TG_1c	P24270	82_90	Catalase OS=Mus musculus OX=10090 GN=Cat PE=1 SV=4	Cat
GYFEVTHDI	9	H-2-Kd	SB	56.88	PD Mascot	TG	13000000	TG_1b	P24270	82_90	Catalase OS=Mus musculus OX=10090 GN=Cat PE=1 SV=4	Cat
GYFPNKKQL	9	H-2-Kd	SB	138.26	Maxquant	TG	1583900	TG_2c	P70388	567_575	DNA repair protein RAD50 OS=Mus musculus OX=10090 GN=Rad50 PE=1 SV=1	Rad50
GYFPNKKQL	9	H-2-Kd	SB	138.26	PD Mascot	HG	2600000	HG_2c	P70388	567_575	DNA repair protein RAD50 OS=Mus musculus OX=10090 GN=Rad50 PE=1 SV=1	Rad50
GYFPNKKQL	9	H-2-Kd	SB	138.26	Maxquant	Control	2067600	Control_1_1a	P70388	567_575	DNA repair protein RAD50 OS=Mus musculus OX=10090 GN=Rad50 PE=1 SV=1	Rad50
GYFPNKKQL	9	H-2-Kd	SB	138.26	Maxquant	HG	1479900	HG_2a	P70388	567_575	DNA repair protein RAD50 OS=Mus musculus OX=10090 GN=Rad50 PE=1 SV=1	Rad50
GYFPNKKQL	9	H-2-Kd	SB	138.26	Maxquant	HG	1755400	HG_2c	P70388	567_575	DNA repair protein RAD50 OS=Mus musculus OX=10090 GN=Rad50 PE=1 SV=1	Rad50
GYFPNKKQL	9	H-2-Kd	SB	138.26	PD Mascot	Control	4700000	Control_1_1c	P70388	567_575	DNA repair protein RAD50 OS=Mus musculus OX=10090 GN=Rad50 PE=1 SV=1	Rad50
GYFPNKKQL	9	H-2-Kd	SB	138.26	Maxquant	TG	7423800	TG_1a	P70388	567_575	DNA repair protein RAD50 OS=Mus musculus OX=10090 GN=Rad50 PE=1 SV=1	Rad50
GYFPNKKQL	9	H-2-Kd	SB	138.26	Maxquant	HG	2141800	HG_2b	P70388	567_575	DNA repair protein RAD50 OS=Mus musculus OX=10090 GN=Rad50 PE=1 SV=1	Rad50
GYFPNKKQL	9	H-2-Kd	SB	138.26	PD Mascot	HG	3300000	HG_2b	P70388	567_575	DNA repair protein RAD50 OS=Mus musculus OX=10090 GN=Rad50 PE=1 SV=1	Rad50
GYFPNKKQL	9	H-2-Kd	SB	138.26	Maxquant	TG	6114800	TG_1b	P70388	567_575	DNA repair protein RAD50 OS=Mus musculus OX=10090 GN=Rad50 PE=1 SV=1	Rad50
GYFPNKKQL	9	H-2-Kd	SB	138.26	PD Mascot	TG	15000000	TG_1a	P70388	567_575	DNA repair protein RAD50 OS=Mus musculus OX=10090 GN=Rad50 PE=1 SV=1	Rad50
GYFPNKKQL	9	H-2-Kd	SB	138.26	PD Mascot	TG	15000000	TG_1c	P70388	567_575	DNA repair protein RAD50 OS=Mus musculus OX=10090 GN=Rad50 PE=1 SV=1	Rad50
GYFPNKKQL	9	H-2-Kd	SB	138.26	Maxquant	Control	2524400	Control_1_1c	P70388	567_575	DNA repair protein RAD50 OS=Mus musculus OX=10090 GN=Rad50 PE=1 SV=1	Rad50
GYFPNKKQL	9	H-2-Kd	SB	138.26	Maxquant	TG	1466800	TG_2a	P70388	567_575	DNA repair protein RAD50 OS=Mus musculus OX=10090 GN=Rad50 PE=1 SV=1	Rad50
GYFPNKKQL	9	H-2-Kd	SB	138.26	Maxquant	TG	6921000	TG_1c	P70388	567_575	DNA repair protein RAD50 OS=Mus musculus OX=10090 GN=Rad50 PE=1 SV=1	Rad50
GYFPNKKQL	9	H-2-Kd	SB	138.26	Maxquant	Control	4982300	Control_1_1b	P70388	567_575	DNA repair protein RAD50 OS=Mus musculus OX=10090 GN=Rad50 PE=1 SV=1	Rad50
GYFPNKKQL	9	H-2-Kd	SB	138.26	PD Mascot	TG	13000000	TG_1b	P70388	567_575	DNA repair protein RAD50 OS=Mus musculus OX=10090 GN=Rad50 PE=1 SV=1	Rad50
GYIESIQHI	9	H-2-Kd	SB	21.99	Maxquant	HG	4542300	HG_2b	Q9CXC3	200_208	Mitochondrial genome maintenance exonuclease 1 OS=Mus musculus OX=10090 GN=Mgme1 PE=2 SV=1	Mgme1
GYIESIQHI	9	H-2-Kd	SB	21.99	PD Sequest	HG	7500000	HG_2b	Q9CXC3	200_208	Mitochondrial genome maintenance exonuclease 1 OS=Mus musculus OX=10090 GN=Mgme1 PE=2 SV=1	Mgme1
GYIESIQHI	9	H-2-Kd	SB	21.99	PD Mascot	TG	8700000	TG_2b	Q9CXC3	200_208	Mitochondrial genome maintenance exonuclease 1 OS=Mus musculus OX=10090 GN=Mgme1 PE=2 SV=1	Mgme1
GYIESIQHI	9	H-2-Kd	SB	21.99	PD Sequest	Control	4900000	Control_1_1c	Q9CXC3	200_208	Mitochondrial genome maintenance exonuclease 1 OS=Mus musculus OX=10090 GN=Mgme1 PE=2 SV=1	Mgme1
GYIESIQHI	9	H-2-Kd	SB	21.99	PD Sequest	HG	11000000	HG_2a	Q9CXC3	200_208	Mitochondrial genome maintenance exonuclease 1 OS=Mus musculus OX=10090 GN=Mgme1 PE=2 SV=1	Mgme1
GYIESIQHI	9	H-2-Kd	SB	21.99	Maxquant	Control	3943200	Control_1_1c	Q9CXC3	200_208	Mitochondrial genome maintenance exonuclease 1 OS=Mus musculus OX=10090 GN=Mgme1 PE=2 SV=1	Mgme1
GYIESIQHI	9	H-2-Kd	SB	21.99	PD Mascot	TG	50000000	TG_1a	Q9CXC3	200_208	Mitochondrial genome maintenance exonuclease 1 OS=Mus musculus OX=10090 GN=Mgme1 PE=2 SV=1	Mgme1
GYIESIQHI	9	H-2-Kd	SB	21.99	PD Sequest	TG	8700000	TG_2b	Q9CXC3	200_208	Mitochondrial genome maintenance exonuclease 1 OS=Mus musculus OX=10090 GN=Mgme1 PE=2 SV=1	Mgme1
GYIESIQHI	9	H-2-Kd	SB	21.99	PD Sequest	TG	9900000	TG_2a	Q9CXC3	200_208	Mitochondrial genome maintenance exonuclease 1 OS=Mus musculus OX=10090 GN=Mgme1 PE=2 SV=1	Mgme1
GYIESIQHI	9	H-2-Kd	SB	21.99	Maxquant	TG	4164600	TG_2c	Q9CXC3	200_208	Mitochondrial genome maintenance exonuclease 1 OS=Mus musculus OX=10090 GN=Mgme1 PE=2 SV=1	Mgme1
GYIESIQHI	9	H-2-Kd	SB	21.99	PD Mascot	HG	7500000	HG_2b	Q9CXC3	200_208	Mitochondrial genome maintenance exonuclease 1 OS=Mus musculus OX=10090 GN=Mgme1 PE=2 SV=1	Mgme1
GYIESIQHI	9	H-2-Kd	SB	21.99	Maxquant	TG	30825000	TG_1b	Q9CXC3	200_208	Mitochondrial genome maintenance exonuclease 1 OS=Mus musculus OX=10090 GN=Mgme1 PE=2 SV=1	Mgme1
GYIESIQHI	9	H-2-Kd	SB	21.99	PD Sequest	TG	43000000	TG_1c	Q9CXC3	200_208	Mitochondrial genome maintenance exonuclease 1 OS=Mus musculus OX=10090 GN=Mgme1 PE=2 SV=1	Mgme1
GYIESIQHI	9	H-2-Kd	SB	21.99	PD Sequest	TG	50000000	TG_1a	Q9CXC3	200_208	Mitochondrial genome maintenance exonuclease 1 OS=Mus musculus OX=10090 GN=Mgme1 PE=2 SV=1	Mgme1
GYIESIQHI	9	H-2-Kd	SB	21.99	Maxquant	TG	4476300	TG_2a	Q9CXC3	200_208	Mitochondrial genome maintenance exonuclease 1 OS=Mus musculus OX=10090 GN=Mgme1 PE=2 SV=1	Mgme1
GYIESIQHI	9	H-2-Kd	SB	21.99	PD Sequest	TG	10000000	TG_2c	Q9CXC3	200_208	Mitochondrial genome maintenance exonuclease 1 OS=Mus musculus OX=10090 GN=Mgme1 PE=2 SV=1	Mgme1
GYIESIQHI	9	H-2-Kd	SB	21.99	Maxquant	TG	23176000	TG_1a	Q9CXC3	200_208	Mitochondrial genome maintenance exonuclease 1 OS=Mus musculus OX=10090 GN=Mgme1 PE=2 SV=1	Mgme1
GYIESIQHI	9	H-2-Kd	SB	21.99	Maxquant	HG	4939600	HG_2a	Q9CXC3	200_208	Mitochondrial genome maintenance exonuclease 1 OS=Mus musculus OX=10090 GN=Mgme1 PE=2 SV=1	Mgme1
GYIESIQHI	9	H-2-Kd	SB	21.99	Maxquant	HG	4952500	HG_2c	Q9CXC3	200_208	Mitochondrial genome maintenance exonuclease 1 OS=Mus musculus OX=10090 GN=Mgme1 PE=2 SV=1	Mgme1
GYIESIQHI	9	H-2-Kd	SB	21.99	PD Mascot	TG	43000000	TG_1c	Q9CXC3	200_208	Mitochondrial genome maintenance exonuclease 1 OS=Mus musculus OX=10090 GN=Mgme1 PE=2 SV=1	Mgme1
GYIESIQHI	9	H-2-Kd	SB	21.99	PD Mascot	Control	4900000	Control_1_1c	Q9CXC3	200_208	Mitochondrial genome maintenance exonuclease 1 OS=Mus musculus OX=10090 GN=Mgme1 PE=2 SV=1	Mgme1
GYIESIQHI	9	H-2-Kd	SB	21.99	Maxquant	TG	30969000	TG_1c	Q9CXC3	200_208	Mitochondrial genome maintenance exonuclease 1 OS=Mus musculus OX=10090 GN=Mgme1 PE=2 SV=1	Mgme1
GYIESIQHI	9	H-2-Kd	SB	21.99	Maxquant	TG	4597600	TG_2b	Q9CXC3	200_208	Mitochondrial genome maintenance exonuclease 1 OS=Mus musculus OX=10090 GN=Mgme1 PE=2 SV=1	Mgme1
GYIESIQHI	9	H-2-Kd	SB	21.99	PD Mascot	TG	9900000	TG_2a	Q9CXC3	200_208	Mitochondrial genome maintenance exonuclease 1 OS=Mus musculus OX=10090 GN=Mgme1 PE=2 SV=1	Mgme1
GYIESIQHI	9	H-2-Kd	SB	21.99	PD Sequest	HG	8500000	HG_2c	Q9CXC3	200_208	Mitochondrial genome maintenance exonuclease 1 OS=Mus musculus OX=10090 GN=Mgme1 PE=2 SV=1	Mgme1
GYIFKMPQELP	11	H-2-Kd	SB	607.9	PD Mascot	HG	4000000	HG_2a	P30306	194_204	M-phase inducer phosphatase 2 OS=Mus musculus OX=10090 GN=Cdc25b PE=1 SV=1	Cdc25b
GYIFKMPQELP	11	H-2-Kd	SB	607.9	PD Mascot	Control	10000000	Control_1_1b	P30306	194_204	M-phase inducer phosphatase 2 OS=Mus musculus OX=10090 GN=Cdc25b PE=1 SV=1	Cdc25b
GYIFKMPQELP	11	H-2-Kd	SB	607.9	PD Mascot	Control	9200000	Control_1_1c	P30306	194_204	M-phase inducer phosphatase 2 OS=Mus musculus OX=10090 GN=Cdc25b PE=1 SV=1	Cdc25b
GYKAGMTHI	9	H-2-Kd	SB	15.04	PD Mascot	Control	13000000	Control_1_1b	P27659	47_55	60S ribosomal protein L3 OS=Mus musculus OX=10090 GN=Rpl3 PE=1 SV=3	Rpl3
GYKAGMTHI	9	H-2-Kd	SB	15.04	PD Mascot	TG	7800000	TG_2a	P27659	47_55	60S ribosomal protein L3 OS=Mus musculus OX=10090 GN=Rpl3 PE=1 SV=3	Rpl3
GYKAGMTHI	9	H-2-Kd	SB	15.04	PD Mascot	TG	4600000	TG_2b	P27659	47_55	60S ribosomal protein L3 OS=Mus musculus OX=10090 GN=Rpl3 PE=1 SV=3	Rpl3
GYKAGMTHI	9	H-2-Kd	SB	15.04	PD Mascot	TG	7900000	TG_2b	P27659	47_55	60S ribosomal protein L3 OS=Mus musculus OX=10090 GN=Rpl3 PE=1 SV=3	Rpl3
GYKAGMTHI	9	H-2-Kd	SB	15.04	PD Mascot	HG	15000000	HG_1b	P27659	47_55	60S ribosomal protein L3 OS=Mus musculus OX=10090 GN=Rpl3 PE=1 SV=3	Rpl3
GYKAGMTHI	9	H-2-Kd	SB	15.04	Maxquant	Control	18692000	Control_1_1a	P27659	47_55	60S ribosomal protein L3 OS=Mus musculus OX=10090 GN=Rpl3 PE=1 SV=3	Rpl3
GYKAGMTHI	9	H-2-Kd	SB	15.04	Maxquant	HG	9889600	HG_1a	P27659	47_55	60S ribosomal protein L3 OS=Mus musculus OX=10090 GN=Rpl3 PE=1 SV=3	Rpl3
GYKAGMTHI	9	H-2-Kd	SB	15.04	PD Mascot	HG	5300000	HG_1a	P27659	47_55	60S ribosomal protein L3 OS=Mus musculus OX=10090 GN=Rpl3 PE=1 SV=3	Rpl3
GYKAGMTHI	9	H-2-Kd	SB	15.04	Maxquant	TG	7842000	TG_1a	P27659	47_55	60S ribosomal protein L3 OS=Mus musculus OX=10090 GN=Rpl3 PE=1 SV=3	Rpl3
GYKAGMTHI	9	H-2-Kd	SB	15.04	PD Mascot	Control	22000000	Control_1_1b	P27659	47_55	60S ribosomal protein L3 OS=Mus musculus OX=10090 GN=Rpl3 PE=1 SV=3	Rpl3
GYKAGMTHI	9	H-2-Kd	SB	15.04	Maxquant	Control	20975000	Control_1_1b	P27659	47_55	60S ribosomal protein L3 OS=Mus musculus OX=10090 GN=Rpl3 PE=1 SV=3	Rpl3
GYKAGMTHI	9	H-2-Kd	SB	15.04	PD Mascot	HG	4500000	HG_1c	P27659	47_55	60S ribosomal protein L3 OS=Mus musculus OX=10090 GN=Rpl3 PE=1 SV=3	Rpl3
GYKAGMTHI	9	H-2-Kd	SB	15.04	Maxquant	TG	11618000	TG_2a	P27659	47_55	60S ribosomal protein L3 OS=Mus musculus OX=10090 GN=Rpl3 PE=1 SV=3	Rpl3
GYKAGMTHI	9	H-2-Kd	SB	15.04	Maxquant	Control	2467200	Control_1_2a	P27659	47_55	60S ribosomal protein L3 OS=Mus musculus OX=10090 GN=Rpl3 PE=1 SV=3	Rpl3
GYKAGMTHI	9	H-2-Kd	SB	15.04	Maxquant	Control	2041500	Control_1_2b	P27659	47_55	60S ribosomal protein L3 OS=Mus musculus OX=10090 GN=Rpl3 PE=1 SV=3	Rpl3
GYKAGMTHI	9	H-2-Kd	SB	15.04	PD Mascot	Control	1700000	Control_1_2a	P27659	47_55	60S ribosomal protein L3 OS=Mus musculus OX=10090 GN=Rpl3 PE=1 SV=3	Rpl3
GYKAGMTHI	9	H-2-Kd	SB	15.04	PD Mascot	TG	9100000	TG_1c	P27659	47_55	60S ribosomal protein L3 OS=Mus musculus OX=10090 GN=Rpl3 PE=1 SV=3	Rpl3
GYKAGMTHI	9	H-2-Kd	SB	15.04	PD Mascot	Control	13000000	Control_1_1c	P27659	47_55	60S ribosomal protein L3 OS=Mus musculus OX=10090 GN=Rpl3 PE=1 SV=3	Rpl3
GYKAGMTHI	9	H-2-Kd	SB	15.04	PD Mascot	Control	23000000	Control_1_1c	P27659	47_55	60S ribosomal protein L3 OS=Mus musculus OX=10090 GN=Rpl3 PE=1 SV=3	Rpl3
GYKAGMTHI	9	H-2-Kd	SB	15.04	PD Mascot	Control	2600000	Control_1_2c	P27659	47_55	60S ribosomal protein L3 OS=Mus musculus OX=10090 GN=Rpl3 PE=1 SV=3	Rpl3
GYKAGMTHI	9	H-2-Kd	SB	15.04	Maxquant	HG	13538000	HG_2c	P27659	47_55	60S ribosomal protein L3 OS=Mus musculus OX=10090 GN=Rpl3 PE=1 SV=3	Rpl3
GYKAGMTHI	9	H-2-Kd	SB	15.04	Maxquant	TG	15112000	TG_2c	P27659	47_55	60S ribosomal protein L3 OS=Mus musculus OX=10090 GN=Rpl3 PE=1 SV=3	Rpl3
GYKAGMTHI	9	H-2-Kd	SB	15.04	PD Mascot	HG	9200000	HG_2b	P27659	47_55	60S ribosomal protein L3 OS=Mus musculus OX=10090 GN=Rpl3 PE=1 SV=3	Rpl3
GYKAGMTHI	9	H-2-Kd	SB	15.04	PD Mascot	TG	4900000	TG_2c	P27659	47_55	60S ribosomal protein L3 OS=Mus musculus OX=10090 GN=Rpl3 PE=1 SV=3	Rpl3
GYKAGMTHI	9	H-2-Kd	SB	15.04	PD Mascot	Control	13000000	Control_1_1a	P27659	47_55	60S ribosomal protein L3 OS=Mus musculus OX=10090 GN=Rpl3 PE=1 SV=3	Rpl3
GYKAGMTHI	9	H-2-Kd	SB	15.04	PD Mascot	Control	20000000	Control_1_1a	P27659	47_55	60S ribosomal protein L3 OS=Mus musculus OX=10090 GN=Rpl3 PE=1 SV=3	Rpl3
GYKAGMTHI	9	H-2-Kd	SB	15.04	PD Mascot	TG	15000000	TG_1c	P27659	47_55	60S ribosomal protein L3 OS=Mus musculus OX=10090 GN=Rpl3 PE=1 SV=3	Rpl3
GYKAGMTHI	9	H-2-Kd	SB	15.04	Maxquant	Control	18823000	Control_1_1c	P27659	47_55	60S ribosomal protein L3 OS=Mus musculus OX=10090 GN=Rpl3 PE=1 SV=3	Rpl3
GYKAGMTHI	9	H-2-Kd	SB	15.04	PD Mascot	HG	9900000	HG_2c	P27659	47_55	60S ribosomal protein L3 OS=Mus musculus OX=10090 GN=Rpl3 PE=1 SV=3	Rpl3
GYKAGMTHI	9	H-2-Kd	SB	15.04	PD Mascot	HG	13000000	HG_1c	P27659	47_55	60S ribosomal protein L3 OS=Mus musculus OX=10090 GN=Rpl3 PE=1 SV=3	Rpl3
GYKAGMTHI	9	H-2-Kd	SB	15.04	Maxquant	HG	11280000	HG_1c	P27659	47_55	60S ribosomal protein L3 OS=Mus musculus OX=10090 GN=Rpl3 PE=1 SV=3	Rpl3
GYKAGMTHI	9	H-2-Kd	SB	15.04	PD Mascot	HG	9500000	HG_2b	P27659	47_55	60S ribosomal protein L3 OS=Mus musculus OX=10090 GN=Rpl3 PE=1 SV=3	Rpl3
GYKAGMTHI	9	H-2-Kd	SB	15.04	Maxquant	TG	24065000	TG_1b	P27659	47_55	60S ribosomal protein L3 OS=Mus musculus OX=10090 GN=Rpl3 PE=1 SV=3	Rpl3
GYKAGMTHI	9	H-2-Kd	SB	15.04	PD Mascot	HG	7200000	HG_2c	P27659	47_55	60S ribosomal protein L3 OS=Mus musculus OX=10090 GN=Rpl3 PE=1 SV=3	Rpl3
GYKAGMTHI	9	H-2-Kd	SB	15.04	PD Mascot	HG	12000000	HG_1a	P27659	47_55	60S ribosomal protein L3 OS=Mus musculus OX=10090 GN=Rpl3 PE=1 SV=3	Rpl3
GYKAGMTHI	9	H-2-Kd	SB	15.04	PD Mascot	TG	15000000	TG_1b	P27659	47_55	60S ribosomal protein L3 OS=Mus musculus OX=10090 GN=Rpl3 PE=1 SV=3	Rpl3
GYKAGMTHI	9	H-2-Kd	SB	15.04	PD Mascot	TG	9000000	TG_2c	P27659	47_55	60S ribosomal protein L3 OS=Mus musculus OX=10090 GN=Rpl3 PE=1 SV=3	Rpl3
GYKAGMTHI	9	H-2-Kd	SB	15.04	Maxquant	Control	3283200	Control_1_2c	P27659	47_55	60S ribosomal protein L3 OS=Mus musculus OX=10090 GN=Rpl3 PE=1 SV=3	Rpl3
GYKAGMTHI	9	H-2-Kd	SB	15.04	Maxquant	HG	12947000	HG_1b	P27659	47_55	60S ribosomal protein L3 OS=Mus musculus OX=10090 GN=Rpl3 PE=1 SV=3	Rpl3
GYKAGMTHI	9	H-2-Kd	SB	15.04	Maxquant	TG	15554000	TG_2b	P27659	47_55	60S ribosomal protein L3 OS=Mus musculus OX=10090 GN=Rpl3 PE=1 SV=3	Rpl3
GYKAGMTHI	9	H-2-Kd	SB	15.04	PD Mascot	HG	11000000	HG_2a	P27659	47_55	60S ribosomal protein L3 OS=Mus musculus OX=10090 GN=Rpl3 PE=1 SV=3	Rpl3
GYKAGMTHI	9	H-2-Kd	SB	15.04	Maxquant	HG	21534000	HG_2a	P27659	47_55	60S ribosomal protein L3 OS=Mus musculus OX=10090 GN=Rpl3 PE=1 SV=3	Rpl3
GYKAGMTHI	9	H-2-Kd	SB	15.04	PD Mascot	TG	5700000	TG_2a	P27659	47_55	60S ribosomal protein L3 OS=Mus musculus OX=10090 GN=Rpl3 PE=1 SV=3	Rpl3
GYKAGMTHI	9	H-2-Kd	SB	15.04	Maxquant	TG	15581000	TG_1c	P27659	47_55	60S ribosomal protein L3 OS=Mus musculus OX=10090 GN=Rpl3 PE=1 SV=3	Rpl3
GYKAGMTHI	9	H-2-Kd	SB	15.04	PD Mascot	HG	5800000	HG_1b	P27659	47_55	60S ribosomal protein L3 OS=Mus musculus OX=10090 GN=Rpl3 PE=1 SV=3	Rpl3
GYKAGMTHI	9	H-2-Kd	SB	15.04	PD Mascot	TG	13000000	TG_1a	P27659	47_55	60S ribosomal protein L3 OS=Mus musculus OX=10090 GN=Rpl3 PE=1 SV=3	Rpl3
GYKAGMTHI	9	H-2-Kd	SB	15.04	PD Mascot	TG	11000000	TG_1b	P27659	47_55	60S ribosomal protein L3 OS=Mus musculus OX=10090 GN=Rpl3 PE=1 SV=3	Rpl3
GYKAGMTHI	9	H-2-Kd	SB	15.04	Maxquant	HG	19772000	HG_2b	P27659	47_55	60S ribosomal protein L3 OS=Mus musculus OX=10090 GN=Rpl3 PE=1 SV=3	Rpl3
GYKAGMTHI	9	H-2-Kd	SB	15.04	PD Mascot	HG	9300000	HG_2a	P27659	47_55	60S ribosomal protein L3 OS=Mus musculus OX=10090 GN=Rpl3 PE=1 SV=3	Rpl3
GYLELLDHV	9	H-2-Kd	SB	138.2	Maxquant	TG	4038400	TG_1c	P26039	2245_2253	Talin-1 OS=Mus musculus OX=10090 GN=Tln1 PE=1 SV=2	Tln1
GYLELLDHV	9	H-2-Kd	SB	138.2	Maxquant	TG	5910300	TG_1b	P26039	2245_2253	Talin-1 OS=Mus musculus OX=10090 GN=Tln1 PE=1 SV=2	Tln1
GYLELLDHV	9	H-2-Kd	SB	138.2	PD Mascot	TG	5600000	TG_1a	P26039	2245_2253	Talin-1 OS=Mus musculus OX=10090 GN=Tln1 PE=1 SV=2	Tln1
GYLELLDHV	9	H-2-Kd	SB	138.2	PD Sequest	TG	5600000	TG_1a	P26039	2245_2253	Talin-1 OS=Mus musculus OX=10090 GN=Tln1 PE=1 SV=2	Tln1
GYLELLDHV	9	H-2-Kd	SB	138.2	PD Mascot	TG	6000000	TG_1b	P26039	2245_2253	Talin-1 OS=Mus musculus OX=10090 GN=Tln1 PE=1 SV=2	Tln1
GYLELLDHV	9	H-2-Kd	SB	138.2	PD Sequest	TG	6000000	TG_1b	P26039	2245_2253	Talin-1 OS=Mus musculus OX=10090 GN=Tln1 PE=1 SV=2	Tln1
GYLELLDHV	9	H-2-Kd	SB	138.2	Maxquant	TG	4723800	TG_1a	P26039	2245_2253	Talin-1 OS=Mus musculus OX=10090 GN=Tln1 PE=1 SV=2	Tln1
GYLITNREI	9	H-2-Kd	SB	75.82	Maxquant	TG	587720	TG_2c	Q9WVF7	303_311	DNA polymerase epsilon catalytic subunit A OS=Mus musculus OX=10090 GN=Pole PE=1 SV=3	Pole
GYLITNREI	9	H-2-Kd	SB	75.82	Maxquant	TG	2212400	TG_1c	Q9WVF7	303_311	DNA polymerase epsilon catalytic subunit A OS=Mus musculus OX=10090 GN=Pole PE=1 SV=3	Pole
GYLITNREI	9	H-2-Kd	SB	75.82	PD Sequest	TG	5400000	TG_1b	Q9WVF7	303_311	DNA polymerase epsilon catalytic subunit A OS=Mus musculus OX=10090 GN=Pole PE=1 SV=3	Pole
GYLITNREI	9	H-2-Kd	SB	75.82	Maxquant	Control	746550	Control_1_1a	Q9WVF7	303_311	DNA polymerase epsilon catalytic subunit A OS=Mus musculus OX=10090 GN=Pole PE=1 SV=3	Pole
GYLITNREI	9	H-2-Kd	SB	75.82	Maxquant	TG	915390	TG_2a	Q9WVF7	303_311	DNA polymerase epsilon catalytic subunit A OS=Mus musculus OX=10090 GN=Pole PE=1 SV=3	Pole
GYLITNREI	9	H-2-Kd	SB	75.82	Maxquant	Control	846720	Control_1_1c	Q9WVF7	303_311	DNA polymerase epsilon catalytic subunit A OS=Mus musculus OX=10090 GN=Pole PE=1 SV=3	Pole
GYLITNREI	9	H-2-Kd	SB	75.82	Maxquant	TG	2617400	TG_1b	Q9WVF7	303_311	DNA polymerase epsilon catalytic subunit A OS=Mus musculus OX=10090 GN=Pole PE=1 SV=3	Pole
GYLITNREI	9	H-2-Kd	SB	75.82	PD Mascot	HG	2500000	HG_2c	Q9WVF7	303_311	DNA polymerase epsilon catalytic subunit A OS=Mus musculus OX=10090 GN=Pole PE=1 SV=3	Pole
GYLITNREI	9	H-2-Kd	SB	75.82	PD Sequest	TG	4900000	TG_1a	Q9WVF7	303_311	DNA polymerase epsilon catalytic subunit A OS=Mus musculus OX=10090 GN=Pole PE=1 SV=3	Pole
GYLITNREI	9	H-2-Kd	SB	75.82	Maxquant	TG	2516100	TG_1a	Q9WVF7	303_311	DNA polymerase epsilon catalytic subunit A OS=Mus musculus OX=10090 GN=Pole PE=1 SV=3	Pole
GYLITNREI	9	H-2-Kd	SB	75.82	PD Mascot	TG	5000000	TG_1c	Q9WVF7	303_311	DNA polymerase epsilon catalytic subunit A OS=Mus musculus OX=10090 GN=Pole PE=1 SV=3	Pole
GYLITNREI	9	H-2-Kd	SB	75.82	Maxquant	Control	724840	Control_1_1b	Q9WVF7	303_311	DNA polymerase epsilon catalytic subunit A OS=Mus musculus OX=10090 GN=Pole PE=1 SV=3	Pole
GYLITNREI	9	H-2-Kd	SB	75.82	PD Sequest	HG	1200000	HG_2a	Q9WVF7	303_311	DNA polymerase epsilon catalytic subunit A OS=Mus musculus OX=10090 GN=Pole PE=1 SV=3	Pole
GYLITNREI	9	H-2-Kd	SB	75.82	PD Mascot	TG	4900000	TG_1a	Q9WVF7	303_311	DNA polymerase epsilon catalytic subunit A OS=Mus musculus OX=10090 GN=Pole PE=1 SV=3	Pole
GYLITNREI	9	H-2-Kd	SB	75.82	PD Sequest	HG	2500000	HG_2c	Q9WVF7	303_311	DNA polymerase epsilon catalytic subunit A OS=Mus musculus OX=10090 GN=Pole PE=1 SV=3	Pole
GYLITNREI	9	H-2-Kd	SB	75.82	PD Sequest	TG	5000000	TG_1c	Q9WVF7	303_311	DNA polymerase epsilon catalytic subunit A OS=Mus musculus OX=10090 GN=Pole PE=1 SV=3	Pole
GYLITNREI	9	H-2-Kd	SB	75.82	Maxquant	HG	1297100	HG_2a	Q9WVF7	303_311	DNA polymerase epsilon catalytic subunit A OS=Mus musculus OX=10090 GN=Pole PE=1 SV=3	Pole
GYLITNREI	9	H-2-Kd	SB	75.82	PD Mascot	TG	5400000	TG_1b	Q9WVF7	303_311	DNA polymerase epsilon catalytic subunit A OS=Mus musculus OX=10090 GN=Pole PE=1 SV=3	Pole
GYLITNREI	9	H-2-Kd	SB	75.82	Maxquant	TG	816130	TG_2b	Q9WVF7	303_311	DNA polymerase epsilon catalytic subunit A OS=Mus musculus OX=10090 GN=Pole PE=1 SV=3	Pole
GYLITNREI	9	H-2-Kd	SB	75.82	Maxquant	HG	1012700	HG_2b	Q9WVF7	303_311	DNA polymerase epsilon catalytic subunit A OS=Mus musculus OX=10090 GN=Pole PE=1 SV=3	Pole
GYLITNREI	9	H-2-Kd	SB	75.82	Maxquant	HG	1281500	HG_2c	Q9WVF7	303_311	DNA polymerase epsilon catalytic subunit A OS=Mus musculus OX=10090 GN=Pole PE=1 SV=3	Pole
GYLITNREI	9	H-2-Kd	SB	75.82	PD Mascot	HG	1200000	HG_2a	Q9WVF7	303_311	DNA polymerase epsilon catalytic subunit A OS=Mus musculus OX=10090 GN=Pole PE=1 SV=3	Pole
GYLKGYTLV	9	H-2-Kd	SB	45.23	Maxquant	TG	5431900	TG_1a	Q9CWZ3	110_118	RNA-binding protein 8A OS=Mus musculus OX=10090 GN=Rbm8a PE=1 SV=4	Rbm8a
GYLKGYTLV	9	H-2-Kd	SB	45.23	Maxquant	Control	567870	Control_1_1b	Q9CWZ3	110_118	RNA-binding protein 8A OS=Mus musculus OX=10090 GN=Rbm8a PE=1 SV=4	Rbm8a
GYLKGYTLV	9	H-2-Kd	SB	45.23	Maxquant	Control	546110	Control_1_1a	Q9CWZ3	110_118	RNA-binding protein 8A OS=Mus musculus OX=10090 GN=Rbm8a PE=1 SV=4	Rbm8a
GYLKGYTLV	9	H-2-Kd	SB	45.23	Maxquant	TG	5544300	TG_1c	Q9CWZ3	110_118	RNA-binding protein 8A OS=Mus musculus OX=10090 GN=Rbm8a PE=1 SV=4	Rbm8a
GYLKGYTLV	9	H-2-Kd	SB	45.23	Maxquant	TG	1234300	TG_2c	Q9CWZ3	110_118	RNA-binding protein 8A OS=Mus musculus OX=10090 GN=Rbm8a PE=1 SV=4	Rbm8a
GYLKGYTLV	9	H-2-Kd	SB	45.23	Maxquant	TG	5878200	TG_1b	Q9CWZ3	110_118	RNA-binding protein 8A OS=Mus musculus OX=10090 GN=Rbm8a PE=1 SV=4	Rbm8a
GYLLILHEL	9	H-2-Kd	SB	174.24	PD Sequest	TG	4700000	TG_1c	A2AKB9	326_334	DDB1- and CUL4-associated factor 10 OS=Mus musculus OX=10090 GN=Dcaf10 PE=1 SV=1	Dcaf10
GYLLILHEL	9	H-2-Kd	SB	174.24	Maxquant	TG	4564000	TG_1a	A2AKB9	326_334	DDB1- and CUL4-associated factor 10 OS=Mus musculus OX=10090 GN=Dcaf10 PE=1 SV=1	Dcaf10
GYLLILHEL	9	H-2-Kd	SB	174.24	PD Sequest	TG	4900000	TG_1a	A2AKB9	326_334	DDB1- and CUL4-associated factor 10 OS=Mus musculus OX=10090 GN=Dcaf10 PE=1 SV=1	Dcaf10
GYLLILHEL	9	H-2-Kd	SB	174.24	PD Mascot	TG	4700000	TG_1c	A2AKB9	326_334	DDB1- and CUL4-associated factor 10 OS=Mus musculus OX=10090 GN=Dcaf10 PE=1 SV=1	Dcaf10
GYLLILHEL	9	H-2-Kd	SB	174.24	PD Mascot	TG	4900000	TG_1a	A2AKB9	326_334	DDB1- and CUL4-associated factor 10 OS=Mus musculus OX=10090 GN=Dcaf10 PE=1 SV=1	Dcaf10
GYLLILHEL	9	H-2-Kd	SB	174.24	Maxquant	TG	4036500	TG_1b	A2AKB9	326_334	DDB1- and CUL4-associated factor 10 OS=Mus musculus OX=10090 GN=Dcaf10 PE=1 SV=1	Dcaf10
GYLLILHEL	9	H-2-Kd	SB	174.24	PD Mascot	TG	4200000	TG_1b	A2AKB9	326_334	DDB1- and CUL4-associated factor 10 OS=Mus musculus OX=10090 GN=Dcaf10 PE=1 SV=1	Dcaf10
GYLLILHEL	9	H-2-Kd	SB	174.24	Maxquant	TG	3341200	TG_1c	A2AKB9	326_334	DDB1- and CUL4-associated factor 10 OS=Mus musculus OX=10090 GN=Dcaf10 PE=1 SV=1	Dcaf10
GYLLILHEL	9	H-2-Kd	SB	174.24	PD Sequest	TG	4200000	TG_1b	A2AKB9	326_334	DDB1- and CUL4-associated factor 10 OS=Mus musculus OX=10090 GN=Dcaf10 PE=1 SV=1	Dcaf10
GYLPGNEKL	9	H-2-Kd	SB	164.36	PD Mascot	Control	140000000	Control_1_1b	P97372	91_99	Proteasome activator complex subunit 2 OS=Mus musculus OX=10090 GN=Psme2 PE=1 SV=4	Psme2
GYLPGNEKL	9	H-2-Kd	SB	164.36	PD Mascot	TG	330000000	TG_1b	P97372	91_99	Proteasome activator complex subunit 2 OS=Mus musculus OX=10090 GN=Psme2 PE=1 SV=4	Psme2
GYLPGNEKL	9	H-2-Kd	SB	164.36	PD Mascot	TG	110000000	TG_2b	P97372	91_99	Proteasome activator complex subunit 2 OS=Mus musculus OX=10090 GN=Psme2 PE=1 SV=4	Psme2
GYLPGNEKL	9	H-2-Kd	SB	164.36	Maxquant	Control	59007000	Control_1_1b	P97372	91_99	Proteasome activator complex subunit 2 OS=Mus musculus OX=10090 GN=Psme2 PE=1 SV=4	Psme2
GYLPGNEKL	9	H-2-Kd	SB	164.36	Maxquant	TG	137390000	TG_1b	P97372	91_99	Proteasome activator complex subunit 2 OS=Mus musculus OX=10090 GN=Psme2 PE=1 SV=4	Psme2
GYLPGNEKL	9	H-2-Kd	SB	164.36	Maxquant	HG	107120000	HG_2c	P97372	91_99	Proteasome activator complex subunit 2 OS=Mus musculus OX=10090 GN=Psme2 PE=1 SV=4	Psme2
GYLPGNEKL	9	H-2-Kd	SB	164.36	PD Mascot	TG	110000000	TG_2a	P97372	91_99	Proteasome activator complex subunit 2 OS=Mus musculus OX=10090 GN=Psme2 PE=1 SV=4	Psme2
GYLPGNEKL	9	H-2-Kd	SB	164.36	Maxquant	TG	45575000	TG_2b	P97372	91_99	Proteasome activator complex subunit 2 OS=Mus musculus OX=10090 GN=Psme2 PE=1 SV=4	Psme2
GYLPGNEKL	9	H-2-Kd	SB	164.36	PD Mascot	HG	13000000	HG_1c	P97372	91_99	Proteasome activator complex subunit 2 OS=Mus musculus OX=10090 GN=Psme2 PE=1 SV=4	Psme2
GYLPGNEKL	9	H-2-Kd	SB	164.36	Maxquant	Control	3177100	Control_1_2a	P97372	91_99	Proteasome activator complex subunit 2 OS=Mus musculus OX=10090 GN=Psme2 PE=1 SV=4	Psme2
GYLPGNEKL	9	H-2-Kd	SB	164.36	PD Mascot	HG	180000000	HG_2a	P97372	91_99	Proteasome activator complex subunit 2 OS=Mus musculus OX=10090 GN=Psme2 PE=1 SV=4	Psme2
GYLPGNEKL	9	H-2-Kd	SB	164.36	PD Mascot	HG	210000000	HG_2c	P97372	91_99	Proteasome activator complex subunit 2 OS=Mus musculus OX=10090 GN=Psme2 PE=1 SV=4	Psme2
GYLPGNEKL	9	H-2-Kd	SB	164.36	Maxquant	TG	46679000	TG_2a	P97372	91_99	Proteasome activator complex subunit 2 OS=Mus musculus OX=10090 GN=Psme2 PE=1 SV=4	Psme2
GYLPGNEKL	9	H-2-Kd	SB	164.36	Maxquant	Control	5737000	Control_1_2c	P97372	91_99	Proteasome activator complex subunit 2 OS=Mus musculus OX=10090 GN=Psme2 PE=1 SV=4	Psme2
GYLPGNEKL	9	H-2-Kd	SB	164.36	Maxquant	HG	5583400	HG_1c	P97372	91_99	Proteasome activator complex subunit 2 OS=Mus musculus OX=10090 GN=Psme2 PE=1 SV=4	Psme2
GYLPGNEKL	9	H-2-Kd	SB	164.36	Maxquant	HG	97564000	HG_2b	P97372	91_99	Proteasome activator complex subunit 2 OS=Mus musculus OX=10090 GN=Psme2 PE=1 SV=4	Psme2
GYLPGNEKL	9	H-2-Kd	SB	164.36	Maxquant	HG	5913100	HG_1a	P97372	91_99	Proteasome activator complex subunit 2 OS=Mus musculus OX=10090 GN=Psme2 PE=1 SV=4	Psme2
GYLPGNEKL	9	H-2-Kd	SB	164.36	PD Mascot	Control	130000000	Control_1_1a	P97372	91_99	Proteasome activator complex subunit 2 OS=Mus musculus OX=10090 GN=Psme2 PE=1 SV=4	Psme2
GYLPGNEKL	9	H-2-Kd	SB	164.36	Maxquant	Control	3445200	Control_1_2b	P97372	91_99	Proteasome activator complex subunit 2 OS=Mus musculus OX=10090 GN=Psme2 PE=1 SV=4	Psme2
GYLPGNEKL	9	H-2-Kd	SB	164.36	Maxquant	TG	134370000	TG_1a	P97372	91_99	Proteasome activator complex subunit 2 OS=Mus musculus OX=10090 GN=Psme2 PE=1 SV=4	Psme2
GYLPGNEKL	9	H-2-Kd	SB	164.36	Maxquant	HG	5880800	HG_1b	P97372	91_99	Proteasome activator complex subunit 2 OS=Mus musculus OX=10090 GN=Psme2 PE=1 SV=4	Psme2
GYLPGNEKL	9	H-2-Kd	SB	164.36	PD Mascot	Control	13000000	Control_1_2c	P97372	91_99	Proteasome activator complex subunit 2 OS=Mus musculus OX=10090 GN=Psme2 PE=1 SV=4	Psme2
GYLPGNEKL	9	H-2-Kd	SB	164.36	Maxquant	Control	63168000	Control_1_1a	P97372	91_99	Proteasome activator complex subunit 2 OS=Mus musculus OX=10090 GN=Psme2 PE=1 SV=4	Psme2
GYLPGNEKL	9	H-2-Kd	SB	164.36	Maxquant	HG	75190000	HG_2a	P97372	91_99	Proteasome activator complex subunit 2 OS=Mus musculus OX=10090 GN=Psme2 PE=1 SV=4	Psme2
GYLPGNEKL	9	H-2-Kd	SB	164.36	Maxquant	TG	152450000	TG_1c	P97372	91_99	Proteasome activator complex subunit 2 OS=Mus musculus OX=10090 GN=Psme2 PE=1 SV=4	Psme2
GYLPGNEKL	9	H-2-Kd	SB	164.36	Maxquant	Control	59753000	Control_1_1c	P97372	91_99	Proteasome activator complex subunit 2 OS=Mus musculus OX=10090 GN=Psme2 PE=1 SV=4	Psme2
GYLPGNEKL	9	H-2-Kd	SB	164.36	PD Mascot	Control	3400000	Control_1_2b	P97372	91_99	Proteasome activator complex subunit 2 OS=Mus musculus OX=10090 GN=Psme2 PE=1 SV=4	Psme2
GYLPGNEKL	9	H-2-Kd	SB	164.36	Maxquant	TG	43638000	TG_2c	P97372	91_99	Proteasome activator complex subunit 2 OS=Mus musculus OX=10090 GN=Psme2 PE=1 SV=4	Psme2
GYLPGNEKL	9	H-2-Kd	SB	164.36	PD Mascot	HG	200000000	HG_2b	P97372	91_99	Proteasome activator complex subunit 2 OS=Mus musculus OX=10090 GN=Psme2 PE=1 SV=4	Psme2
GYLPGNEKL	9	H-2-Kd	SB	164.36	PD Mascot	TG	330000000	TG_1c	P97372	91_99	Proteasome activator complex subunit 2 OS=Mus musculus OX=10090 GN=Psme2 PE=1 SV=4	Psme2
GYLPLAHVL	9	H-2-Kd	SB	64.26	PD Mascot	TG	26000000	TG_1a	Q9CZW4	325_333	Long-chain-fatty-acid--CoA ligase 3 OS=Mus musculus OX=10090 GN=Acsl3 PE=1 SV=2	Acsl3
GYLPNKQVL	9	H-2-Kd	SB	126.08	PD Mascot	TG	660000000	TG_1b	Q05915	145_153	GTP cyclohydrolase 1 OS=Mus musculus OX=10090 GN=Gch1 PE=1 SV=1	Gch1
GYLPNKQVL	9	H-2-Kd	SB	126.08	PD Mascot	HG	290000000	HG_2b	Q05915	145_153	GTP cyclohydrolase 1 OS=Mus musculus OX=10090 GN=Gch1 PE=1 SV=1	Gch1
GYLPNKQVL	9	H-2-Kd	SB	126.08	PD Sequest	TG	200000000	TG_2c	Q05915	145_153	GTP cyclohydrolase 1 OS=Mus musculus OX=10090 GN=Gch1 PE=1 SV=1	Gch1
GYLPNKQVL	9	H-2-Kd	SB	126.08	PD Sequest	TG	660000000	TG_1b	Q05915	145_153	GTP cyclohydrolase 1 OS=Mus musculus OX=10090 GN=Gch1 PE=1 SV=1	Gch1
GYLPNKQVL	9	H-2-Kd	SB	126.08	PD Sequest	Control	11000000	Control_1_2b	Q05915	145_153	GTP cyclohydrolase 1 OS=Mus musculus OX=10090 GN=Gch1 PE=1 SV=1	Gch1
GYLPNKQVL	9	H-2-Kd	SB	126.08	PD Sequest	TG	590000000	TG_1c	Q05915	145_153	GTP cyclohydrolase 1 OS=Mus musculus OX=10090 GN=Gch1 PE=1 SV=1	Gch1
GYLPNKQVL	9	H-2-Kd	SB	126.08	PD Sequest	HG	290000000	HG_2b	Q05915	145_153	GTP cyclohydrolase 1 OS=Mus musculus OX=10090 GN=Gch1 PE=1 SV=1	Gch1
GYLPNKQVL	9	H-2-Kd	SB	126.08	PD Mascot	Control	280000000	Control_1_1c	Q05915	145_153	GTP cyclohydrolase 1 OS=Mus musculus OX=10090 GN=Gch1 PE=1 SV=1	Gch1
GYLPNKQVL	9	H-2-Kd	SB	126.08	PD Mascot	TG	690000000	TG_1a	Q05915	145_153	GTP cyclohydrolase 1 OS=Mus musculus OX=10090 GN=Gch1 PE=1 SV=1	Gch1
GYLPNKQVL	9	H-2-Kd	SB	126.08	Maxquant	Control	84861000	Control_1_1b	Q05915	145_153	GTP cyclohydrolase 1 OS=Mus musculus OX=10090 GN=Gch1 PE=1 SV=1	Gch1
GYLPNKQVL	9	H-2-Kd	SB	126.08	Maxquant	HG	132430000	HG_2a	Q05915	145_153	GTP cyclohydrolase 1 OS=Mus musculus OX=10090 GN=Gch1 PE=1 SV=1	Gch1
GYLPNKQVL	9	H-2-Kd	SB	126.08	Maxquant	TG	96807000	TG_2b	Q05915	145_153	GTP cyclohydrolase 1 OS=Mus musculus OX=10090 GN=Gch1 PE=1 SV=1	Gch1
GYLPNKQVL	9	H-2-Kd	SB	126.08	PD Sequest	HG	300000000	HG_2a	Q05915	145_153	GTP cyclohydrolase 1 OS=Mus musculus OX=10090 GN=Gch1 PE=1 SV=1	Gch1
GYLPNKQVL	9	H-2-Kd	SB	126.08	PD Sequest	TG	690000000	TG_1a	Q05915	145_153	GTP cyclohydrolase 1 OS=Mus musculus OX=10090 GN=Gch1 PE=1 SV=1	Gch1
GYLPNKQVL	9	H-2-Kd	SB	126.08	Maxquant	Control	4665800	Control_1_2b	Q05915	145_153	GTP cyclohydrolase 1 OS=Mus musculus OX=10090 GN=Gch1 PE=1 SV=1	Gch1
GYLPNKQVL	9	H-2-Kd	SB	126.08	Maxquant	Control	130240000	Control_1_1c	Q05915	145_153	GTP cyclohydrolase 1 OS=Mus musculus OX=10090 GN=Gch1 PE=1 SV=1	Gch1
GYLPNKQVL	9	H-2-Kd	SB	126.08	PD Mascot	TG	200000000	TG_2c	Q05915	145_153	GTP cyclohydrolase 1 OS=Mus musculus OX=10090 GN=Gch1 PE=1 SV=1	Gch1
GYLPNKQVL	9	H-2-Kd	SB	126.08	Maxquant	TG	283160000	TG_1a	Q05915	145_153	GTP cyclohydrolase 1 OS=Mus musculus OX=10090 GN=Gch1 PE=1 SV=1	Gch1
GYLPNKQVL	9	H-2-Kd	SB	126.08	Maxquant	TG	222360000	TG_1c	Q05915	145_153	GTP cyclohydrolase 1 OS=Mus musculus OX=10090 GN=Gch1 PE=1 SV=1	Gch1
GYLPNKQVL	9	H-2-Kd	SB	126.08	Maxquant	HG	104170000	HG_2b	Q05915	145_153	GTP cyclohydrolase 1 OS=Mus musculus OX=10090 GN=Gch1 PE=1 SV=1	Gch1
GYLPNKQVL	9	H-2-Kd	SB	126.08	PD Sequest	Control	280000000	Control_1_1c	Q05915	145_153	GTP cyclohydrolase 1 OS=Mus musculus OX=10090 GN=Gch1 PE=1 SV=1	Gch1
GYLPNKQVL	9	H-2-Kd	SB	126.08	Maxquant	Control	9706400	Control_1_2c	Q05915	145_153	GTP cyclohydrolase 1 OS=Mus musculus OX=10090 GN=Gch1 PE=1 SV=1	Gch1
GYLPNKQVL	9	H-2-Kd	SB	126.08	Maxquant	TG	88775000	TG_2c	Q05915	145_153	GTP cyclohydrolase 1 OS=Mus musculus OX=10090 GN=Gch1 PE=1 SV=1	Gch1
GYLPNKQVL	9	H-2-Kd	SB	126.08	PD Mascot	Control	16000000	Control_1_2c	Q05915	145_153	GTP cyclohydrolase 1 OS=Mus musculus OX=10090 GN=Gch1 PE=1 SV=1	Gch1
GYLPNKQVL	9	H-2-Kd	SB	126.08	Maxquant	Control	6201900	Control_1_2a	Q05915	145_153	GTP cyclohydrolase 1 OS=Mus musculus OX=10090 GN=Gch1 PE=1 SV=1	Gch1
GYLPNKQVL	9	H-2-Kd	SB	126.08	Maxquant	TG	280120000	TG_1b	Q05915	145_153	GTP cyclohydrolase 1 OS=Mus musculus OX=10090 GN=Gch1 PE=1 SV=1	Gch1
GYLPNKQVL	9	H-2-Kd	SB	126.08	PD Sequest	Control	180000000	Control_1_1b	Q05915	145_153	GTP cyclohydrolase 1 OS=Mus musculus OX=10090 GN=Gch1 PE=1 SV=1	Gch1
GYLPNKQVL	9	H-2-Kd	SB	126.08	PD Sequest	TG	200000000	TG_2b	Q05915	145_153	GTP cyclohydrolase 1 OS=Mus musculus OX=10090 GN=Gch1 PE=1 SV=1	Gch1
GYLPNKQVL	9	H-2-Kd	SB	126.08	PD Mascot	Control	11000000	Control_1_2b	Q05915	145_153	GTP cyclohydrolase 1 OS=Mus musculus OX=10090 GN=Gch1 PE=1 SV=1	Gch1
GYLPNKQVL	9	H-2-Kd	SB	126.08	PD Mascot	Control	180000000	Control_1_1b	Q05915	145_153	GTP cyclohydrolase 1 OS=Mus musculus OX=10090 GN=Gch1 PE=1 SV=1	Gch1
GYLPNKQVL	9	H-2-Kd	SB	126.08	PD Sequest	Control	16000000	Control_1_2c	Q05915	145_153	GTP cyclohydrolase 1 OS=Mus musculus OX=10090 GN=Gch1 PE=1 SV=1	Gch1
GYLPNKQVL	9	H-2-Kd	SB	126.08	Maxquant	TG	98495000	TG_2a	Q05915	145_153	GTP cyclohydrolase 1 OS=Mus musculus OX=10090 GN=Gch1 PE=1 SV=1	Gch1
GYLPNKQVL	9	H-2-Kd	SB	126.08	Maxquant	HG	123060000	HG_2c	Q05915	145_153	GTP cyclohydrolase 1 OS=Mus musculus OX=10090 GN=Gch1 PE=1 SV=1	Gch1
GYLPNKQVL	9	H-2-Kd	SB	126.08	PD Mascot	HG	300000000	HG_2a	Q05915	145_153	GTP cyclohydrolase 1 OS=Mus musculus OX=10090 GN=Gch1 PE=1 SV=1	Gch1
GYLPNKQVL	9	H-2-Kd	SB	126.08	Maxquant	Control	70259000	Control_1_1a	Q05915	145_153	GTP cyclohydrolase 1 OS=Mus musculus OX=10090 GN=Gch1 PE=1 SV=1	Gch1
GYLSSERLI	9	H-2-Kd	SB	56.63	PD Mascot	TG	1900000	TG_1a	P26040	144_152	Ezrin OS=Mus musculus OX=10090 GN=Ezr PE=1 SV=3	Ezr
GYNSVQHLI	9	H-2-Kd	SB	77.88	PD Mascot	TG	36000000	TG_1c	Q91V83	681_689	TELO2-interacting protein 1 homolog OS=Mus musculus OX=10090 GN=Tti1 PE=1 SV=2	Tti1
GYNSVQHLI	9	H-2-Kd	SB	77.88	Maxquant	TG	16987000	TG_1c	Q91V83	681_689	TELO2-interacting protein 1 homolog OS=Mus musculus OX=10090 GN=Tti1 PE=1 SV=2	Tti1
GYNSVQHLI	9	H-2-Kd	SB	77.88	Maxquant	TG	19735000	TG_1b	Q91V83	681_689	TELO2-interacting protein 1 homolog OS=Mus musculus OX=10090 GN=Tti1 PE=1 SV=2	Tti1
GYNSVQHLI	9	H-2-Kd	SB	77.88	Maxquant	TG	18027000	TG_1a	Q91V83	681_689	TELO2-interacting protein 1 homolog OS=Mus musculus OX=10090 GN=Tti1 PE=1 SV=2	Tti1
GYNSVQHLI	9	H-2-Kd	SB	77.88	PD Sequest	TG	8900000	TG_2b	Q91V83	681_689	TELO2-interacting protein 1 homolog OS=Mus musculus OX=10090 GN=Tti1 PE=1 SV=2	Tti1
GYNSVQHLI	9	H-2-Kd	SB	77.88	Maxquant	TG	4218300	TG_2c	Q91V83	681_689	TELO2-interacting protein 1 homolog OS=Mus musculus OX=10090 GN=Tti1 PE=1 SV=2	Tti1
GYNSVQHLI	9	H-2-Kd	SB	77.88	PD Sequest	TG	36000000	TG_1c	Q91V83	681_689	TELO2-interacting protein 1 homolog OS=Mus musculus OX=10090 GN=Tti1 PE=1 SV=2	Tti1
GYNSVQHLI	9	H-2-Kd	SB	77.88	PD Mascot	Control	2600000	Control_1_1a	Q91V83	681_689	TELO2-interacting protein 1 homolog OS=Mus musculus OX=10090 GN=Tti1 PE=1 SV=2	Tti1
GYNSVQHLI	9	H-2-Kd	SB	77.88	Maxquant	Control	6952700	Control_1_1a	Q91V83	681_689	TELO2-interacting protein 1 homolog OS=Mus musculus OX=10090 GN=Tti1 PE=1 SV=2	Tti1
GYNSVQHLI	9	H-2-Kd	SB	77.88	PD Sequest	Control	12000000	Control_1_1c	Q91V83	681_689	TELO2-interacting protein 1 homolog OS=Mus musculus OX=10090 GN=Tti1 PE=1 SV=2	Tti1
GYNSVQHLI	9	H-2-Kd	SB	77.88	Maxquant	Control	6513100	Control_1_1c	Q91V83	681_689	TELO2-interacting protein 1 homolog OS=Mus musculus OX=10090 GN=Tti1 PE=1 SV=2	Tti1
GYNSVQHLI	9	H-2-Kd	SB	77.88	PD Sequest	TG	9300000	TG_2c	Q91V83	681_689	TELO2-interacting protein 1 homolog OS=Mus musculus OX=10090 GN=Tti1 PE=1 SV=2	Tti1
GYNSVQHLI	9	H-2-Kd	SB	77.88	PD Sequest	Control	2600000	Control_1_1a	Q91V83	681_689	TELO2-interacting protein 1 homolog OS=Mus musculus OX=10090 GN=Tti1 PE=1 SV=2	Tti1
GYVDNKEFV	9	H-2-Kd	WB	785.1	PD Sequest	TG	24000000	TG_1b	P01899	49_57	H-2 class I histocompatibility antigen, D-B alpha chain OS=Mus musculus OX=10090 GN=H2-D1 PE=1 SV=2	H2-D1
GYVDNKEFV	9	H-2-Kd	WB	785.1	PD Sequest	Control	16000000	Control_1_1c	P01899	49_57	H-2 class I histocompatibility antigen, D-B alpha chain OS=Mus musculus OX=10090 GN=H2-D1 PE=1 SV=2	H2-D1
GYVDNKEFV	9	H-2-Kd	WB	785.1	Maxquant	Control	1879100	Control_1_2a	P01899	49_57	H-2 class I histocompatibility antigen, D-B alpha chain OS=Mus musculus OX=10090 GN=H2-D1 PE=1 SV=2	H2-D1
GYVDNKEFV	9	H-2-Kd	WB	785.1	Maxquant	TG	2225800	TG_2a	P01899	49_57	H-2 class I histocompatibility antigen, D-B alpha chain OS=Mus musculus OX=10090 GN=H2-D1 PE=1 SV=2	H2-D1
GYVDNKEFV	9	H-2-Kd	WB	785.1	Maxquant	HG	4047400	HG_1c	P01899	49_57	H-2 class I histocompatibility antigen, D-B alpha chain OS=Mus musculus OX=10090 GN=H2-D1 PE=1 SV=2	H2-D1
GYVDNKEFV	9	H-2-Kd	WB	785.1	Maxquant	TG	15677000	TG_1a	P01899	49_57	H-2 class I histocompatibility antigen, D-B alpha chain OS=Mus musculus OX=10090 GN=H2-D1 PE=1 SV=2	H2-D1
GYVDNKEFV	9	H-2-Kd	WB	785.1	Maxquant	HG	8865000	HG_2b	P01899	49_57	H-2 class I histocompatibility antigen, D-B alpha chain OS=Mus musculus OX=10090 GN=H2-D1 PE=1 SV=2	H2-D1
GYVDNKEFV	9	H-2-Kd	WB	785.1	PD Sequest	TG	2600000	TG_2b	P01899	49_57	H-2 class I histocompatibility antigen, D-B alpha chain OS=Mus musculus OX=10090 GN=H2-D1 PE=1 SV=2	H2-D1
GYVDNKEFV	9	H-2-Kd	WB	785.1	PD Sequest	TG	28000000	TG_1c	P01899	49_57	H-2 class I histocompatibility antigen, D-B alpha chain OS=Mus musculus OX=10090 GN=H2-D1 PE=1 SV=2	H2-D1
GYVDNKEFV	9	H-2-Kd	WB	785.1	PD Sequest	Control	25000000	Control_1_1a	P01899	49_57	H-2 class I histocompatibility antigen, D-B alpha chain OS=Mus musculus OX=10090 GN=H2-D1 PE=1 SV=2	H2-D1
GYVDNKEFV	9	H-2-Kd	WB	785.1	PD Sequest	TG	2700000	TG_2c	P01899	49_57	H-2 class I histocompatibility antigen, D-B alpha chain OS=Mus musculus OX=10090 GN=H2-D1 PE=1 SV=2	H2-D1
GYVDNKEFV	9	H-2-Kd	WB	785.1	PD Sequest	HG	22000000	HG_2a	P01899	49_57	H-2 class I histocompatibility antigen, D-B alpha chain OS=Mus musculus OX=10090 GN=H2-D1 PE=1 SV=2	H2-D1
GYVDNKEFV	9	H-2-Kd	WB	785.1	Maxquant	HG	4202000	HG_1a	P01899	49_57	H-2 class I histocompatibility antigen, D-B alpha chain OS=Mus musculus OX=10090 GN=H2-D1 PE=1 SV=2	H2-D1
GYVDNKEFV	9	H-2-Kd	WB	785.1	Maxquant	TG	13058000	TG_1b	P01899	49_57	H-2 class I histocompatibility antigen, D-B alpha chain OS=Mus musculus OX=10090 GN=H2-D1 PE=1 SV=2	H2-D1
GYVDNKEFV	9	H-2-Kd	WB	785.1	PD Sequest	HG	21000000	HG_2c	P01899	49_57	H-2 class I histocompatibility antigen, D-B alpha chain OS=Mus musculus OX=10090 GN=H2-D1 PE=1 SV=2	H2-D1
GYVDNKEFV	9	H-2-Kd	WB	785.1	Maxquant	HG	7942300	HG_2a	P01899	49_57	H-2 class I histocompatibility antigen, D-B alpha chain OS=Mus musculus OX=10090 GN=H2-D1 PE=1 SV=2	H2-D1
GYVDNKEFV	9	H-2-Kd	WB	785.1	Maxquant	TG	5930200	TG_2c	P01899	49_57	H-2 class I histocompatibility antigen, D-B alpha chain OS=Mus musculus OX=10090 GN=H2-D1 PE=1 SV=2	H2-D1
GYVDNKEFV	9	H-2-Kd	WB	785.1	Maxquant	Control	1558600	Control_1_2c	P01899	49_57	H-2 class I histocompatibility antigen, D-B alpha chain OS=Mus musculus OX=10090 GN=H2-D1 PE=1 SV=2	H2-D1
GYVDNKEFV	9	H-2-Kd	WB	785.1	PD Mascot	Control	25000000	Control_1_1a	P01899	49_57	H-2 class I histocompatibility antigen, D-B alpha chain OS=Mus musculus OX=10090 GN=H2-D1 PE=1 SV=2	H2-D1
GYVDNKEFV	9	H-2-Kd	WB	785.1	PD Mascot	HG	21000000	HG_2c	P01899	49_57	H-2 class I histocompatibility antigen, D-B alpha chain OS=Mus musculus OX=10090 GN=H2-D1 PE=1 SV=2	H2-D1
GYVDNKEFV	9	H-2-Kd	WB	785.1	Maxquant	HG	3486300	HG_1b	P01899	49_57	H-2 class I histocompatibility antigen, D-B alpha chain OS=Mus musculus OX=10090 GN=H2-D1 PE=1 SV=2	H2-D1
GYVDNKEFV	9	H-2-Kd	WB	785.1	Maxquant	TG	13638000	TG_1c	P01899	49_57	H-2 class I histocompatibility antigen, D-B alpha chain OS=Mus musculus OX=10090 GN=H2-D1 PE=1 SV=2	H2-D1
GYVDNKEFV	9	H-2-Kd	WB	785.1	Maxquant	TG	1726400	TG_2b	P01899	49_57	H-2 class I histocompatibility antigen, D-B alpha chain OS=Mus musculus OX=10090 GN=H2-D1 PE=1 SV=2	H2-D1
GYVDNKEFV	9	H-2-Kd	WB	785.1	Maxquant	HG	8843400	HG_2c	P01899	49_57	H-2 class I histocompatibility antigen, D-B alpha chain OS=Mus musculus OX=10090 GN=H2-D1 PE=1 SV=2	H2-D1
GYVDNKEFV	9	H-2-Kd	WB	785.1	PD Sequest	HG	7800000	HG_1b	P01899	49_57	H-2 class I histocompatibility antigen, D-B alpha chain OS=Mus musculus OX=10090 GN=H2-D1 PE=1 SV=2	H2-D1
GYVDNKEFV	9	H-2-Kd	WB	785.1	PD Sequest	Control	33000000	Control_1_1b	P01899	49_57	H-2 class I histocompatibility antigen, D-B alpha chain OS=Mus musculus OX=10090 GN=H2-D1 PE=1 SV=2	H2-D1
GYVDNKEFV	9	H-2-Kd	WB	785.1	Maxquant	Control	12406000	Control_1_1a	P01899	49_57	H-2 class I histocompatibility antigen, D-B alpha chain OS=Mus musculus OX=10090 GN=H2-D1 PE=1 SV=2	H2-D1
GYVDNKEFV	9	H-2-Kd	WB	785.1	PD Sequest	HG	8700000	HG_1a	P01899	49_57	H-2 class I histocompatibility antigen, D-B alpha chain OS=Mus musculus OX=10090 GN=H2-D1 PE=1 SV=2	H2-D1
GYVDNKEFV	9	H-2-Kd	WB	785.1	PD Sequest	TG	17000000	TG_1a	P01899	49_57	H-2 class I histocompatibility antigen, D-B alpha chain OS=Mus musculus OX=10090 GN=H2-D1 PE=1 SV=2	H2-D1
GYVDNKEFV	9	H-2-Kd	WB	785.1	PD Mascot	HG	8700000	HG_1a	P01899	49_57	H-2 class I histocompatibility antigen, D-B alpha chain OS=Mus musculus OX=10090 GN=H2-D1 PE=1 SV=2	H2-D1
GYVDNKEFV	9	H-2-Kd	WB	785.1	Maxquant	Control	11491000	Control_1_1c	P01899	49_57	H-2 class I histocompatibility antigen, D-B alpha chain OS=Mus musculus OX=10090 GN=H2-D1 PE=1 SV=2	H2-D1
GYVDNKEFV	9	H-2-Kd	WB	785.1	Maxquant	Control	11518000	Control_1_1b	P01899	49_57	H-2 class I histocompatibility antigen, D-B alpha chain OS=Mus musculus OX=10090 GN=H2-D1 PE=1 SV=2	H2-D1
GYVETPRGL	9	H-2-Kd	WB	929.92	PD Sequest	Control	49000000	Control_1_1c	P27659	90_98	60S ribosomal protein L3 OS=Mus musculus OX=10090 GN=Rpl3 PE=1 SV=3	Rpl3
GYVETPRGL	9	H-2-Kd	WB	929.92	Maxquant	HG	22048000	HG_2c	P27659	90_98	60S ribosomal protein L3 OS=Mus musculus OX=10090 GN=Rpl3 PE=1 SV=3	Rpl3
GYVETPRGL	9	H-2-Kd	WB	929.92	PD Mascot	Control	53000000	Control_1_1a	P27659	90_98	60S ribosomal protein L3 OS=Mus musculus OX=10090 GN=Rpl3 PE=1 SV=3	Rpl3
GYVETPRGL	9	H-2-Kd	WB	929.92	Maxquant	TG	6455300	TG_2b	P27659	90_98	60S ribosomal protein L3 OS=Mus musculus OX=10090 GN=Rpl3 PE=1 SV=3	Rpl3
GYVETPRGL	9	H-2-Kd	WB	929.92	PD Sequest	HG	27000000	HG_2c	P27659	90_98	60S ribosomal protein L3 OS=Mus musculus OX=10090 GN=Rpl3 PE=1 SV=3	Rpl3
GYVETPRGL	9	H-2-Kd	WB	929.92	PD Sequest	TG	50000000	TG_1c	P27659	90_98	60S ribosomal protein L3 OS=Mus musculus OX=10090 GN=Rpl3 PE=1 SV=3	Rpl3
GYVETPRGL	9	H-2-Kd	WB	929.92	Maxquant	Control	3299700	Control_1_2c	P27659	90_98	60S ribosomal protein L3 OS=Mus musculus OX=10090 GN=Rpl3 PE=1 SV=3	Rpl3
GYVETPRGL	9	H-2-Kd	WB	929.92	Maxquant	TG	17566000	TG_1b	P27659	90_98	60S ribosomal protein L3 OS=Mus musculus OX=10090 GN=Rpl3 PE=1 SV=3	Rpl3
GYVETPRGL	9	H-2-Kd	WB	929.92	PD Mascot	Control	5200000	Control_1_2c	P27659	90_98	60S ribosomal protein L3 OS=Mus musculus OX=10090 GN=Rpl3 PE=1 SV=3	Rpl3
GYVETPRGL	9	H-2-Kd	WB	929.92	PD Mascot	HG	49000000	HG_2a	P27659	90_98	60S ribosomal protein L3 OS=Mus musculus OX=10090 GN=Rpl3 PE=1 SV=3	Rpl3
GYVETPRGL	9	H-2-Kd	WB	929.92	Maxquant	Control	23884000	Control_1_1a	P27659	90_98	60S ribosomal protein L3 OS=Mus musculus OX=10090 GN=Rpl3 PE=1 SV=3	Rpl3
GYVETPRGL	9	H-2-Kd	WB	929.92	PD Sequest	TG	12000000	TG_2b	P27659	90_98	60S ribosomal protein L3 OS=Mus musculus OX=10090 GN=Rpl3 PE=1 SV=3	Rpl3
GYVETPRGL	9	H-2-Kd	WB	929.92	PD Mascot	TG	61000000	TG_1b	P27659	90_98	60S ribosomal protein L3 OS=Mus musculus OX=10090 GN=Rpl3 PE=1 SV=3	Rpl3
GYVETPRGL	9	H-2-Kd	WB	929.92	Maxquant	TG	5599400	TG_2c	P27659	90_98	60S ribosomal protein L3 OS=Mus musculus OX=10090 GN=Rpl3 PE=1 SV=3	Rpl3
GYVETPRGL	9	H-2-Kd	WB	929.92	PD Sequest	TG	8700000	TG_2a	P27659	90_98	60S ribosomal protein L3 OS=Mus musculus OX=10090 GN=Rpl3 PE=1 SV=3	Rpl3
GYVETPRGL	9	H-2-Kd	WB	929.92	PD Mascot	TG	63000000	TG_1a	P27659	90_98	60S ribosomal protein L3 OS=Mus musculus OX=10090 GN=Rpl3 PE=1 SV=3	Rpl3
GYVETPRGL	9	H-2-Kd	WB	929.92	PD Mascot	TG	8700000	TG_2a	P27659	90_98	60S ribosomal protein L3 OS=Mus musculus OX=10090 GN=Rpl3 PE=1 SV=3	Rpl3
GYVETPRGL	9	H-2-Kd	WB	929.92	PD Mascot	HG	49000000	HG_2b	P27659	90_98	60S ribosomal protein L3 OS=Mus musculus OX=10090 GN=Rpl3 PE=1 SV=3	Rpl3
GYVETPRGL	9	H-2-Kd	WB	929.92	PD Sequest	TG	12000000	TG_2c	P27659	90_98	60S ribosomal protein L3 OS=Mus musculus OX=10090 GN=Rpl3 PE=1 SV=3	Rpl3
GYVETPRGL	9	H-2-Kd	WB	929.92	PD Mascot	Control	49000000	Control_1_1c	P27659	90_98	60S ribosomal protein L3 OS=Mus musculus OX=10090 GN=Rpl3 PE=1 SV=3	Rpl3
GYVETPRGL	9	H-2-Kd	WB	929.92	Maxquant	Control	18862000	Control_1_1b	P27659	90_98	60S ribosomal protein L3 OS=Mus musculus OX=10090 GN=Rpl3 PE=1 SV=3	Rpl3
GYVETPRGL	9	H-2-Kd	WB	929.92	PD Sequest	Control	53000000	Control_1_1a	P27659	90_98	60S ribosomal protein L3 OS=Mus musculus OX=10090 GN=Rpl3 PE=1 SV=3	Rpl3
GYVETPRGL	9	H-2-Kd	WB	929.92	PD Sequest	TG	61000000	TG_1b	P27659	90_98	60S ribosomal protein L3 OS=Mus musculus OX=10090 GN=Rpl3 PE=1 SV=3	Rpl3
GYVETPRGL	9	H-2-Kd	WB	929.92	PD Mascot	TG	12000000	TG_2c	P27659	90_98	60S ribosomal protein L3 OS=Mus musculus OX=10090 GN=Rpl3 PE=1 SV=3	Rpl3
GYVETPRGL	9	H-2-Kd	WB	929.92	PD Sequest	HG	49000000	HG_2b	P27659	90_98	60S ribosomal protein L3 OS=Mus musculus OX=10090 GN=Rpl3 PE=1 SV=3	Rpl3
GYVETPRGL	9	H-2-Kd	WB	929.92	PD Mascot	HG	27000000	HG_2c	P27659	90_98	60S ribosomal protein L3 OS=Mus musculus OX=10090 GN=Rpl3 PE=1 SV=3	Rpl3
GYVETPRGL	9	H-2-Kd	WB	929.92	Maxquant	HG	18916000	HG_2a	P27659	90_98	60S ribosomal protein L3 OS=Mus musculus OX=10090 GN=Rpl3 PE=1 SV=3	Rpl3
GYVETPRGL	9	H-2-Kd	WB	929.92	PD Sequest	Control	5200000	Control_1_2c	P27659	90_98	60S ribosomal protein L3 OS=Mus musculus OX=10090 GN=Rpl3 PE=1 SV=3	Rpl3
GYVETPRGL	9	H-2-Kd	WB	929.92	PD Mascot	TG	12000000	TG_2b	P27659	90_98	60S ribosomal protein L3 OS=Mus musculus OX=10090 GN=Rpl3 PE=1 SV=3	Rpl3
GYVETPRGL	9	H-2-Kd	WB	929.92	Maxquant	TG	21675000	TG_1a	P27659	90_98	60S ribosomal protein L3 OS=Mus musculus OX=10090 GN=Rpl3 PE=1 SV=3	Rpl3
GYVETPRGL	9	H-2-Kd	WB	929.92	PD Sequest	TG	63000000	TG_1a	P27659	90_98	60S ribosomal protein L3 OS=Mus musculus OX=10090 GN=Rpl3 PE=1 SV=3	Rpl3
GYVETPRGL	9	H-2-Kd	WB	929.92	PD Sequest	HG	2300000	HG_1a	P27659	90_98	60S ribosomal protein L3 OS=Mus musculus OX=10090 GN=Rpl3 PE=1 SV=3	Rpl3
GYVETPRGL	9	H-2-Kd	WB	929.92	Maxquant	HG	4888400	HG_1c	P27659	90_98	60S ribosomal protein L3 OS=Mus musculus OX=10090 GN=Rpl3 PE=1 SV=3	Rpl3
GYVETPRGL	9	H-2-Kd	WB	929.92	PD Mascot	TG	50000000	TG_1c	P27659	90_98	60S ribosomal protein L3 OS=Mus musculus OX=10090 GN=Rpl3 PE=1 SV=3	Rpl3
GYVETPRGL	9	H-2-Kd	WB	929.92	PD Sequest	HG	49000000	HG_2a	P27659	90_98	60S ribosomal protein L3 OS=Mus musculus OX=10090 GN=Rpl3 PE=1 SV=3	Rpl3
GYVETPRGL	9	H-2-Kd	WB	929.92	Maxquant	TG	23553000	TG_1c	P27659	90_98	60S ribosomal protein L3 OS=Mus musculus OX=10090 GN=Rpl3 PE=1 SV=3	Rpl3
GYVETPRGL	9	H-2-Kd	WB	929.92	Maxquant	TG	3339800	TG_2a	P27659	90_98	60S ribosomal protein L3 OS=Mus musculus OX=10090 GN=Rpl3 PE=1 SV=3	Rpl3
GYVETPRGL	9	H-2-Kd	WB	929.92	PD Mascot	HG	2300000	HG_1a	P27659	90_98	60S ribosomal protein L3 OS=Mus musculus OX=10090 GN=Rpl3 PE=1 SV=3	Rpl3
GYVETPRGL	9	H-2-Kd	WB	929.92	Maxquant	HG	17610000	HG_2b	P27659	90_98	60S ribosomal protein L3 OS=Mus musculus OX=10090 GN=Rpl3 PE=1 SV=3	Rpl3
GYVETPRGL	9	H-2-Kd	WB	929.92	Maxquant	Control	18126000	Control_1_1c	P27659	90_98	60S ribosomal protein L3 OS=Mus musculus OX=10090 GN=Rpl3 PE=1 SV=3	Rpl3
GYVQQRRESSL	11	H-2-Kd	SB	159.52	Maxquant	HG	2415500	HG_2b	Q9WVA3	167_177	Mitotic checkpoint protein BUB3 OS=Mus musculus OX=10090 GN=Bub3 PE=1 SV=2	Bub3
GYVQQRRESSL	11	H-2-Kd	SB	159.52	PD Mascot	Control	9200000	Control_1_1c	Q9WVA3	167_177	Mitotic checkpoint protein BUB3 OS=Mus musculus OX=10090 GN=Bub3 PE=1 SV=2	Bub3
GYVQQRRESSL	11	H-2-Kd	SB	159.52	PD Mascot	TG	5900000	TG_1c	Q9WVA3	167_177	Mitotic checkpoint protein BUB3 OS=Mus musculus OX=10090 GN=Bub3 PE=1 SV=2	Bub3
GYVQQRRESSL	11	H-2-Kd	SB	159.52	PD Mascot	TG	5600000	TG_1b	Q9WVA3	167_177	Mitotic checkpoint protein BUB3 OS=Mus musculus OX=10090 GN=Bub3 PE=1 SV=2	Bub3
GYVQQRRESSL	11	H-2-Kd	SB	159.52	Maxquant	TG	4016600	TG_1b	Q9WVA3	167_177	Mitotic checkpoint protein BUB3 OS=Mus musculus OX=10090 GN=Bub3 PE=1 SV=2	Bub3
GYVQQRRESSL	11	H-2-Kd	SB	159.52	Maxquant	Control	5538900	Control_1_1a	Q9WVA3	167_177	Mitotic checkpoint protein BUB3 OS=Mus musculus OX=10090 GN=Bub3 PE=1 SV=2	Bub3
GYVQQRRESSL	11	H-2-Kd	SB	159.52	Maxquant	Control	463610	Control_1_1c	Q9WVA3	167_177	Mitotic checkpoint protein BUB3 OS=Mus musculus OX=10090 GN=Bub3 PE=1 SV=2	Bub3
GYVQQRRESSL	11	H-2-Kd	SB	159.52	PD Sequest	Control	9200000	Control_1_1c	Q9WVA3	167_177	Mitotic checkpoint protein BUB3 OS=Mus musculus OX=10090 GN=Bub3 PE=1 SV=2	Bub3
GYVQQRRESSL	11	H-2-Kd	SB	159.52	Maxquant	TG	2699400	TG_1c	Q9WVA3	167_177	Mitotic checkpoint protein BUB3 OS=Mus musculus OX=10090 GN=Bub3 PE=1 SV=2	Bub3
GYVQQRRESSL	11	H-2-Kd	SB	159.52	Maxquant	TG	963960	TG_2c	Q9WVA3	167_177	Mitotic checkpoint protein BUB3 OS=Mus musculus OX=10090 GN=Bub3 PE=1 SV=2	Bub3
GYVQQRRESSL	11	H-2-Kd	SB	159.52	PD Mascot	Control	9600000	Control_1_1a	Q9WVA3	167_177	Mitotic checkpoint protein BUB3 OS=Mus musculus OX=10090 GN=Bub3 PE=1 SV=2	Bub3
GYVQQRRESSL	11	H-2-Kd	SB	159.52	PD Mascot	TG	5600000	TG_1a	Q9WVA3	167_177	Mitotic checkpoint protein BUB3 OS=Mus musculus OX=10090 GN=Bub3 PE=1 SV=2	Bub3
GYVQQRRESSL	11	H-2-Kd	SB	159.52	Maxquant	HG	2094700	HG_2a	Q9WVA3	167_177	Mitotic checkpoint protein BUB3 OS=Mus musculus OX=10090 GN=Bub3 PE=1 SV=2	Bub3
GYVQQRRESSL	11	H-2-Kd	SB	159.52	PD Sequest	HG	4000000	HG_2a	Q9WVA3	167_177	Mitotic checkpoint protein BUB3 OS=Mus musculus OX=10090 GN=Bub3 PE=1 SV=2	Bub3
GYVQQRRESSL	11	H-2-Kd	SB	159.52	PD Sequest	HG	2600000	HG_1a	Q9WVA3	167_177	Mitotic checkpoint protein BUB3 OS=Mus musculus OX=10090 GN=Bub3 PE=1 SV=2	Bub3
GYVQQRRESSL	11	H-2-Kd	SB	159.52	Maxquant	HG	1430100	HG_1b	Q9WVA3	167_177	Mitotic checkpoint protein BUB3 OS=Mus musculus OX=10090 GN=Bub3 PE=1 SV=2	Bub3
GYVQQRRESSL	11	H-2-Kd	SB	159.52	PD Sequest	TG	5900000	TG_1c	Q9WVA3	167_177	Mitotic checkpoint protein BUB3 OS=Mus musculus OX=10090 GN=Bub3 PE=1 SV=2	Bub3
GYVQQRRESSL	11	H-2-Kd	SB	159.52	Maxquant	TG	964360	TG_2b	Q9WVA3	167_177	Mitotic checkpoint protein BUB3 OS=Mus musculus OX=10090 GN=Bub3 PE=1 SV=2	Bub3
GYVQQRRESSL	11	H-2-Kd	SB	159.52	PD Sequest	HG	4700000	HG_2c	Q9WVA3	167_177	Mitotic checkpoint protein BUB3 OS=Mus musculus OX=10090 GN=Bub3 PE=1 SV=2	Bub3
GYVQQRRESSL	11	H-2-Kd	SB	159.52	PD Sequest	Control	9600000	Control_1_1a	Q9WVA3	167_177	Mitotic checkpoint protein BUB3 OS=Mus musculus OX=10090 GN=Bub3 PE=1 SV=2	Bub3
GYVQQRRESSL	11	H-2-Kd	SB	159.52	Maxquant	Control	5505700	Control_1_1b	Q9WVA3	167_177	Mitotic checkpoint protein BUB3 OS=Mus musculus OX=10090 GN=Bub3 PE=1 SV=2	Bub3
GYVQQRRESSL	11	H-2-Kd	SB	159.52	PD Sequest	Control	10000000	Control_1_1b	Q9WVA3	167_177	Mitotic checkpoint protein BUB3 OS=Mus musculus OX=10090 GN=Bub3 PE=1 SV=2	Bub3
GYVQQRRESSL	11	H-2-Kd	SB	159.52	PD Sequest	TG	5600000	TG_1a	Q9WVA3	167_177	Mitotic checkpoint protein BUB3 OS=Mus musculus OX=10090 GN=Bub3 PE=1 SV=2	Bub3
GYVQQRRESSL	11	H-2-Kd	SB	159.52	Maxquant	TG	754620	TG_2a	Q9WVA3	167_177	Mitotic checkpoint protein BUB3 OS=Mus musculus OX=10090 GN=Bub3 PE=1 SV=2	Bub3
GYVQQRRESSL	11	H-2-Kd	SB	159.52	Maxquant	TG	2737600	TG_1a	Q9WVA3	167_177	Mitotic checkpoint protein BUB3 OS=Mus musculus OX=10090 GN=Bub3 PE=1 SV=2	Bub3
GYVQQRRESSL	11	H-2-Kd	SB	159.52	PD Sequest	HG	2300000	HG_1b	Q9WVA3	167_177	Mitotic checkpoint protein BUB3 OS=Mus musculus OX=10090 GN=Bub3 PE=1 SV=2	Bub3
GYVQQRRESSL	11	H-2-Kd	SB	159.52	Maxquant	HG	1728000	HG_1a	Q9WVA3	167_177	Mitotic checkpoint protein BUB3 OS=Mus musculus OX=10090 GN=Bub3 PE=1 SV=2	Bub3
GYVQQRRESSL	11	H-2-Kd	SB	159.52	Maxquant	HG	1469300	HG_1c	Q9WVA3	167_177	Mitotic checkpoint protein BUB3 OS=Mus musculus OX=10090 GN=Bub3 PE=1 SV=2	Bub3
GYVQQRRESSL	11	H-2-Kd	SB	159.52	PD Mascot	HG	4100000	HG_2b	Q9WVA3	167_177	Mitotic checkpoint protein BUB3 OS=Mus musculus OX=10090 GN=Bub3 PE=1 SV=2	Bub3
GYVQQRRESSL	11	H-2-Kd	SB	159.52	Maxquant	HG	2478100	HG_2c	Q9WVA3	167_177	Mitotic checkpoint protein BUB3 OS=Mus musculus OX=10090 GN=Bub3 PE=1 SV=2	Bub3
GYVQQRRESSL	11	H-2-Kd	SB	159.52	PD Sequest	HG	4100000	HG_2b	Q9WVA3	167_177	Mitotic checkpoint protein BUB3 OS=Mus musculus OX=10090 GN=Bub3 PE=1 SV=2	Bub3
GYVQQRRESSL	11	H-2-Kd	SB	159.52	PD Sequest	TG	5600000	TG_1b	Q9WVA3	167_177	Mitotic checkpoint protein BUB3 OS=Mus musculus OX=10090 GN=Bub3 PE=1 SV=2	Bub3
GYVQQRRESSL	11	H-2-Kd	SB	159.52	PD Sequest	HG	2400000	HG_1c	Q9WVA3	167_177	Mitotic checkpoint protein BUB3 OS=Mus musculus OX=10090 GN=Bub3 PE=1 SV=2	Bub3
GYVQSKEMI	9	H-2-Kd	SB	20.65	Maxquant	HG	4252900	HG_2b	P14685	451_459	26S proteasome non-ATPase regulatory subunit 3 OS=Mus musculus OX=10090 GN=Psmd3 PE=1 SV=3	Psmd3
GYVQSKEMI	9	H-2-Kd	SB	20.65	Maxquant	Control	6675600	Control_1_1c	P14685	451_459	26S proteasome non-ATPase regulatory subunit 3 OS=Mus musculus OX=10090 GN=Psmd3 PE=1 SV=3	Psmd3
GYVQSKEMI	9	H-2-Kd	SB	20.65	PD Mascot	TG	12000000	TG_2b	P14685	451_459	26S proteasome non-ATPase regulatory subunit 3 OS=Mus musculus OX=10090 GN=Psmd3 PE=1 SV=3	Psmd3
GYVQSKEMI	9	H-2-Kd	SB	20.65	Maxquant	Control	5472900	Control_1_1a	P14685	451_459	26S proteasome non-ATPase regulatory subunit 3 OS=Mus musculus OX=10090 GN=Psmd3 PE=1 SV=3	Psmd3
GYVQSKEMI	9	H-2-Kd	SB	20.65	PD Mascot	TG	13000000	TG_2a	P14685	451_459	26S proteasome non-ATPase regulatory subunit 3 OS=Mus musculus OX=10090 GN=Psmd3 PE=1 SV=3	Psmd3
GYVQSKEMI	9	H-2-Kd	SB	20.65	Maxquant	Control	1265000	Control_1_2c	P14685	451_459	26S proteasome non-ATPase regulatory subunit 3 OS=Mus musculus OX=10090 GN=Psmd3 PE=1 SV=3	Psmd3
GYVQSKEMI	9	H-2-Kd	SB	20.65	PD Mascot	TG	9900000	TG_2c	P14685	451_459	26S proteasome non-ATPase regulatory subunit 3 OS=Mus musculus OX=10090 GN=Psmd3 PE=1 SV=3	Psmd3
GYVQSKEMI	9	H-2-Kd	SB	20.65	PD Mascot	HG	4700000	HG_1a	P14685	451_459	26S proteasome non-ATPase regulatory subunit 3 OS=Mus musculus OX=10090 GN=Psmd3 PE=1 SV=3	Psmd3
GYVQSKEMI	9	H-2-Kd	SB	20.65	Maxquant	TG	3755100	TG_2c	P14685	451_459	26S proteasome non-ATPase regulatory subunit 3 OS=Mus musculus OX=10090 GN=Psmd3 PE=1 SV=3	Psmd3
GYVQSKEMI	9	H-2-Kd	SB	20.65	PD Mascot	Control	17000000	Control_1_1a	P14685	451_459	26S proteasome non-ATPase regulatory subunit 3 OS=Mus musculus OX=10090 GN=Psmd3 PE=1 SV=3	Psmd3
GYVQSKEMI	9	H-2-Kd	SB	20.65	Maxquant	HG	2108200	HG_1c	P14685	451_459	26S proteasome non-ATPase regulatory subunit 3 OS=Mus musculus OX=10090 GN=Psmd3 PE=1 SV=3	Psmd3
GYVQSKEMI	9	H-2-Kd	SB	20.65	Maxquant	Control	847010	Control_1_2a	P14685	451_459	26S proteasome non-ATPase regulatory subunit 3 OS=Mus musculus OX=10090 GN=Psmd3 PE=1 SV=3	Psmd3
GYVQSKEMI	9	H-2-Kd	SB	20.65	Maxquant	Control	6578500	Control_1_1b	P14685	451_459	26S proteasome non-ATPase regulatory subunit 3 OS=Mus musculus OX=10090 GN=Psmd3 PE=1 SV=3	Psmd3
GYVQSKEMI	9	H-2-Kd	SB	20.65	Maxquant	TG	7017700	TG_1b	P14685	451_459	26S proteasome non-ATPase regulatory subunit 3 OS=Mus musculus OX=10090 GN=Psmd3 PE=1 SV=3	Psmd3
GYVQSKEMI	9	H-2-Kd	SB	20.65	PD Mascot	TG	17000000	TG_1a	P14685	451_459	26S proteasome non-ATPase regulatory subunit 3 OS=Mus musculus OX=10090 GN=Psmd3 PE=1 SV=3	Psmd3
GYVQSKEMI	9	H-2-Kd	SB	20.65	Maxquant	Control	250020	Control_1_2b	P14685	451_459	26S proteasome non-ATPase regulatory subunit 3 OS=Mus musculus OX=10090 GN=Psmd3 PE=1 SV=3	Psmd3
GYVQSKEMI	9	H-2-Kd	SB	20.65	PD Mascot	HG	5500000	HG_1b	P14685	451_459	26S proteasome non-ATPase regulatory subunit 3 OS=Mus musculus OX=10090 GN=Psmd3 PE=1 SV=3	Psmd3
GYVQSKEMI	9	H-2-Kd	SB	20.65	Maxquant	HG	2339400	HG_1b	P14685	451_459	26S proteasome non-ATPase regulatory subunit 3 OS=Mus musculus OX=10090 GN=Psmd3 PE=1 SV=3	Psmd3
GYVQSKEMI	9	H-2-Kd	SB	20.65	PD Mascot	HG	5200000	HG_1c	P14685	451_459	26S proteasome non-ATPase regulatory subunit 3 OS=Mus musculus OX=10090 GN=Psmd3 PE=1 SV=3	Psmd3
GYVQSKEMI	9	H-2-Kd	SB	20.65	Maxquant	HG	4373700	HG_2c	P14685	451_459	26S proteasome non-ATPase regulatory subunit 3 OS=Mus musculus OX=10090 GN=Psmd3 PE=1 SV=3	Psmd3
GYVQSKEMI	9	H-2-Kd	SB	20.65	Maxquant	HG	1691000	HG_1a	P14685	451_459	26S proteasome non-ATPase regulatory subunit 3 OS=Mus musculus OX=10090 GN=Psmd3 PE=1 SV=3	Psmd3
GYVQSKEMI	9	H-2-Kd	SB	20.65	Maxquant	TG	5615800	TG_1a	P14685	451_459	26S proteasome non-ATPase regulatory subunit 3 OS=Mus musculus OX=10090 GN=Psmd3 PE=1 SV=3	Psmd3
GYVQSKEMI	9	H-2-Kd	SB	20.65	PD Mascot	HG	10000000	HG_2c	P14685	451_459	26S proteasome non-ATPase regulatory subunit 3 OS=Mus musculus OX=10090 GN=Psmd3 PE=1 SV=3	Psmd3
GYVVGRAAL	9	H-2-Kd	SB	143.36	Maxquant	Control	3212400	Control_1_1a	Q7TSG3	290_298	F-box only protein 5 OS=Mus musculus OX=10090 GN=Fbxo5 PE=1 SV=1	Fbxo5
GYVVGRAAL	9	H-2-Kd	SB	143.36	Maxquant	Control	1009700	Control_1_1b	Q7TSG3	290_298	F-box only protein 5 OS=Mus musculus OX=10090 GN=Fbxo5 PE=1 SV=1	Fbxo5
GYVVGRAAL	9	H-2-Kd	SB	143.36	Maxquant	HG	1862100	HG_2b	Q7TSG3	290_298	F-box only protein 5 OS=Mus musculus OX=10090 GN=Fbxo5 PE=1 SV=1	Fbxo5
GYVVGRAAL	9	H-2-Kd	SB	143.36	Maxquant	TG	3317400	TG_1b	Q7TSG3	290_298	F-box only protein 5 OS=Mus musculus OX=10090 GN=Fbxo5 PE=1 SV=1	Fbxo5
GYVVGRAAL	9	H-2-Kd	SB	143.36	Maxquant	HG	1480100	HG_2a	Q7TSG3	290_298	F-box only protein 5 OS=Mus musculus OX=10090 GN=Fbxo5 PE=1 SV=1	Fbxo5
GYVVGRAAL	9	H-2-Kd	SB	143.36	Maxquant	HG	1858400	HG_2c	Q7TSG3	290_298	F-box only protein 5 OS=Mus musculus OX=10090 GN=Fbxo5 PE=1 SV=1	Fbxo5
GYVVGRAAL	9	H-2-Kd	SB	143.36	Maxquant	TG	2661600	TG_1a	Q7TSG3	290_298	F-box only protein 5 OS=Mus musculus OX=10090 GN=Fbxo5 PE=1 SV=1	Fbxo5
GYVVGRAAL	9	H-2-Kd	SB	143.36	Maxquant	Control	3249000	Control_1_1c	Q7TSG3	290_298	F-box only protein 5 OS=Mus musculus OX=10090 GN=Fbxo5 PE=1 SV=1	Fbxo5
GYVVGRAAL	9	H-2-Kd	SB	143.36	Maxquant	TG	3671500	TG_1c	Q7TSG3	290_298	F-box only protein 5 OS=Mus musculus OX=10090 GN=Fbxo5 PE=1 SV=1	Fbxo5
GYVVGRAAL	9	H-2-Kd	SB	143.36	Maxquant	Control	264770	Control_1_2a	Q7TSG3	290_298	F-box only protein 5 OS=Mus musculus OX=10090 GN=Fbxo5 PE=1 SV=1	Fbxo5
GYYPSGVKI	9	H-2-Kd	SB	114.43	PD Mascot	TG	4300000	TG_1c	Q8BVN9	372_380	Protein maelstrom homolog OS=Mus musculus OX=10090 GN=Mael PE=1 SV=1	Mael
GYYPSGVKI	9	H-2-Kd	SB	114.43	PD Mascot	TG	4100000	TG_1a	Q8BVN9	372_380	Protein maelstrom homolog OS=Mus musculus OX=10090 GN=Mael PE=1 SV=1	Mael
GYYQANERV	9	H-2-Kd	SB	102.89	PD Mascot	HG	580000	HG_2a	O70378	87_95	ER membrane protein complex subunit 8 OS=Mus musculus OX=10090 GN=Emc8 PE=1 SV=1	Emc8
GYYQANERV	9	H-2-Kd	SB	102.89	PD Mascot	TG	1600000	TG_1c	O70378	87_95	ER membrane protein complex subunit 8 OS=Mus musculus OX=10090 GN=Emc8 PE=1 SV=1	Emc8
GYYQANERV	9	H-2-Kd	SB	102.89	PD Mascot	Control	2200000	Control_1_1b	O70378	87_95	ER membrane protein complex subunit 8 OS=Mus musculus OX=10090 GN=Emc8 PE=1 SV=1	Emc8
HYEITKQDI	9	H-2-Kd	SB	133.65	PD Mascot	Control	8500000	Control_1_1b	Q62245	153_161	Son of sevenless homolog 1 OS=Mus musculus OX=10090 GN=Sos1 PE=1 SV=2	Sos1
HYEITKQDI	9	H-2-Kd	SB	133.65	PD Mascot	Control	7900000	Control_1_1a	Q62245	153_161	Son of sevenless homolog 1 OS=Mus musculus OX=10090 GN=Sos1 PE=1 SV=2	Sos1
HYEITKQDI	9	H-2-Kd	SB	133.65	PD Mascot	HG	5800000	HG_2c	Q62245	153_161	Son of sevenless homolog 1 OS=Mus musculus OX=10090 GN=Sos1 PE=1 SV=2	Sos1
HYEITKQDI	9	H-2-Kd	SB	133.65	Maxquant	HG	1203000	HG_1b	Q62245	153_161	Son of sevenless homolog 1 OS=Mus musculus OX=10090 GN=Sos1 PE=1 SV=2	Sos1
HYEITKQDI	9	H-2-Kd	SB	133.65	Maxquant	HG	2887700	HG_2b	Q62245	153_161	Son of sevenless homolog 1 OS=Mus musculus OX=10090 GN=Sos1 PE=1 SV=2	Sos1
HYEITKQDI	9	H-2-Kd	SB	133.65	Maxquant	Control	3367600	Control_1_1a	Q62245	153_161	Son of sevenless homolog 1 OS=Mus musculus OX=10090 GN=Sos1 PE=1 SV=2	Sos1
HYEITKQDI	9	H-2-Kd	SB	133.65	Maxquant	TG	5569400	TG_1b	Q62245	153_161	Son of sevenless homolog 1 OS=Mus musculus OX=10090 GN=Sos1 PE=1 SV=2	Sos1
HYEITKQDI	9	H-2-Kd	SB	133.65	Maxquant	TG	1026300	TG_2c	Q62245	153_161	Son of sevenless homolog 1 OS=Mus musculus OX=10090 GN=Sos1 PE=1 SV=2	Sos1
HYEITKQDI	9	H-2-Kd	SB	133.65	Maxquant	Control	3314400	Control_1_1c	Q62245	153_161	Son of sevenless homolog 1 OS=Mus musculus OX=10090 GN=Sos1 PE=1 SV=2	Sos1
HYEITKQDI	9	H-2-Kd	SB	133.65	PD Mascot	Control	7800000	Control_1_1c	Q62245	153_161	Son of sevenless homolog 1 OS=Mus musculus OX=10090 GN=Sos1 PE=1 SV=2	Sos1
HYEITKQDI	9	H-2-Kd	SB	133.65	PD Mascot	TG	12000000	TG_1b	Q62245	153_161	Son of sevenless homolog 1 OS=Mus musculus OX=10090 GN=Sos1 PE=1 SV=2	Sos1
HYEITKQDI	9	H-2-Kd	SB	133.65	PD Mascot	HG	5100000	HG_2b	Q62245	153_161	Son of sevenless homolog 1 OS=Mus musculus OX=10090 GN=Sos1 PE=1 SV=2	Sos1
HYEITKQDI	9	H-2-Kd	SB	133.65	Maxquant	TG	5622800	TG_1c	Q62245	153_161	Son of sevenless homolog 1 OS=Mus musculus OX=10090 GN=Sos1 PE=1 SV=2	Sos1
HYEITKQDI	9	H-2-Kd	SB	133.65	PD Sequest	HG	5800000	HG_2c	Q62245	153_161	Son of sevenless homolog 1 OS=Mus musculus OX=10090 GN=Sos1 PE=1 SV=2	Sos1
HYEITKQDI	9	H-2-Kd	SB	133.65	PD Sequest	TG	12000000	TG_1c	Q62245	153_161	Son of sevenless homolog 1 OS=Mus musculus OX=10090 GN=Sos1 PE=1 SV=2	Sos1
HYEITKQDI	9	H-2-Kd	SB	133.65	PD Sequest	Control	8500000	Control_1_1b	Q62245	153_161	Son of sevenless homolog 1 OS=Mus musculus OX=10090 GN=Sos1 PE=1 SV=2	Sos1
HYEITKQDI	9	H-2-Kd	SB	133.65	Maxquant	HG	2720300	HG_2a	Q62245	153_161	Son of sevenless homolog 1 OS=Mus musculus OX=10090 GN=Sos1 PE=1 SV=2	Sos1
HYEITKQDI	9	H-2-Kd	SB	133.65	Maxquant	HG	2644400	HG_2c	Q62245	153_161	Son of sevenless homolog 1 OS=Mus musculus OX=10090 GN=Sos1 PE=1 SV=2	Sos1
HYEITKQDI	9	H-2-Kd	SB	133.65	PD Sequest	TG	12000000	TG_1b	Q62245	153_161	Son of sevenless homolog 1 OS=Mus musculus OX=10090 GN=Sos1 PE=1 SV=2	Sos1
HYEITKQDI	9	H-2-Kd	SB	133.65	PD Sequest	Control	7900000	Control_1_1a	Q62245	153_161	Son of sevenless homolog 1 OS=Mus musculus OX=10090 GN=Sos1 PE=1 SV=2	Sos1
HYEITKQDI	9	H-2-Kd	SB	133.65	PD Mascot	HG	5300000	HG_2a	Q62245	153_161	Son of sevenless homolog 1 OS=Mus musculus OX=10090 GN=Sos1 PE=1 SV=2	Sos1
HYEITKQDI	9	H-2-Kd	SB	133.65	PD Mascot	TG	12000000	TG_1a	Q62245	153_161	Son of sevenless homolog 1 OS=Mus musculus OX=10090 GN=Sos1 PE=1 SV=2	Sos1
HYEITKQDI	9	H-2-Kd	SB	133.65	PD Sequest	HG	5100000	HG_2b	Q62245	153_161	Son of sevenless homolog 1 OS=Mus musculus OX=10090 GN=Sos1 PE=1 SV=2	Sos1
HYEITKQDI	9	H-2-Kd	SB	133.65	Maxquant	Control	4881600	Control_1_1b	Q62245	153_161	Son of sevenless homolog 1 OS=Mus musculus OX=10090 GN=Sos1 PE=1 SV=2	Sos1
HYEITKQDI	9	H-2-Kd	SB	133.65	PD Sequest	HG	5300000	HG_2a	Q62245	153_161	Son of sevenless homolog 1 OS=Mus musculus OX=10090 GN=Sos1 PE=1 SV=2	Sos1
HYEITKQDI	9	H-2-Kd	SB	133.65	PD Sequest	TG	12000000	TG_1a	Q62245	153_161	Son of sevenless homolog 1 OS=Mus musculus OX=10090 GN=Sos1 PE=1 SV=2	Sos1
HYEITKQDI	9	H-2-Kd	SB	133.65	Maxquant	TG	1081100	TG_2a	Q62245	153_161	Son of sevenless homolog 1 OS=Mus musculus OX=10090 GN=Sos1 PE=1 SV=2	Sos1
HYEITKQDI	9	H-2-Kd	SB	133.65	Maxquant	TG	5785100	TG_1a	Q62245	153_161	Son of sevenless homolog 1 OS=Mus musculus OX=10090 GN=Sos1 PE=1 SV=2	Sos1
HYEITKQDI	9	H-2-Kd	SB	133.65	Maxquant	TG	1200900	TG_2b	Q62245	153_161	Son of sevenless homolog 1 OS=Mus musculus OX=10090 GN=Sos1 PE=1 SV=2	Sos1
HYEITKQDI	9	H-2-Kd	SB	133.65	PD Mascot	TG	12000000	TG_1c	Q62245	153_161	Son of sevenless homolog 1 OS=Mus musculus OX=10090 GN=Sos1 PE=1 SV=2	Sos1
HYEITKQDI	9	H-2-Kd	SB	133.65	PD Sequest	Control	7800000	Control_1_1c	Q62245	153_161	Son of sevenless homolog 1 OS=Mus musculus OX=10090 GN=Sos1 PE=1 SV=2	Sos1
HYFEDKENI	9	H-2-Kd	SB	169.77	Maxquant	Control	1076700	Control_1_1c	P53351	143_151	Serine/threonine-protein kinase PLK2 OS=Mus musculus OX=10090 GN=Plk2 PE=1 SV=1	Plk2
HYFEDKENI	9	H-2-Kd	SB	169.77	Maxquant	TG	2427400	TG_1c	P53351	143_151	Serine/threonine-protein kinase PLK2 OS=Mus musculus OX=10090 GN=Plk2 PE=1 SV=1	Plk2
HYFEDKENI	9	H-2-Kd	SB	169.77	Maxquant	TG	1565800	TG_1b	P53351	143_151	Serine/threonine-protein kinase PLK2 OS=Mus musculus OX=10090 GN=Plk2 PE=1 SV=1	Plk2
HYFEDKENI	9	H-2-Kd	SB	169.77	Maxquant	Control	1679400	Control_1_1a	P53351	143_151	Serine/threonine-protein kinase PLK2 OS=Mus musculus OX=10090 GN=Plk2 PE=1 SV=1	Plk2
HYFEDKENI	9	H-2-Kd	SB	169.77	Maxquant	TG	1862300	TG_1a	P53351	143_151	Serine/threonine-protein kinase PLK2 OS=Mus musculus OX=10090 GN=Plk2 PE=1 SV=1	Plk2
HYFEDKENI	9	H-2-Kd	SB	169.77	Maxquant	TG	550930	TG_2b	P53351	143_151	Serine/threonine-protein kinase PLK2 OS=Mus musculus OX=10090 GN=Plk2 PE=1 SV=1	Plk2
HYGESITNI	9	H-2-Kd	SB	36.56	Maxquant	TG	4493600	TG_1c	Q80YA3	380_388	Phospholipase DDHD1 OS=Mus musculus OX=10090 GN=Ddhd1 PE=1 SV=1	Ddhd1
HYGESITNI	9	H-2-Kd	SB	36.56	Maxquant	Control	5021800	Control_1_1b	Q80YA3	380_388	Phospholipase DDHD1 OS=Mus musculus OX=10090 GN=Ddhd1 PE=1 SV=1	Ddhd1
HYGESITNI	9	H-2-Kd	SB	36.56	Maxquant	HG	3790100	HG_2a	Q80YA3	380_388	Phospholipase DDHD1 OS=Mus musculus OX=10090 GN=Ddhd1 PE=1 SV=1	Ddhd1
HYGESITNI	9	H-2-Kd	SB	36.56	PD Mascot	Control	8100000	Control_1_1c	Q80YA3	380_388	Phospholipase DDHD1 OS=Mus musculus OX=10090 GN=Ddhd1 PE=1 SV=1	Ddhd1
HYGESITNI	9	H-2-Kd	SB	36.56	PD Mascot	HG	6400000	HG_2a	Q80YA3	380_388	Phospholipase DDHD1 OS=Mus musculus OX=10090 GN=Ddhd1 PE=1 SV=1	Ddhd1
HYGESITNI	9	H-2-Kd	SB	36.56	Maxquant	TG	4188100	TG_1b	Q80YA3	380_388	Phospholipase DDHD1 OS=Mus musculus OX=10090 GN=Ddhd1 PE=1 SV=1	Ddhd1
HYGESITNI	9	H-2-Kd	SB	36.56	PD Mascot	Control	8100000	Control_1_1a	Q80YA3	380_388	Phospholipase DDHD1 OS=Mus musculus OX=10090 GN=Ddhd1 PE=1 SV=1	Ddhd1
HYGESITNI	9	H-2-Kd	SB	36.56	Maxquant	HG	952360	HG_1b	Q80YA3	380_388	Phospholipase DDHD1 OS=Mus musculus OX=10090 GN=Ddhd1 PE=1 SV=1	Ddhd1
HYGESITNI	9	H-2-Kd	SB	36.56	Maxquant	TG	837970	TG_2c	Q80YA3	380_388	Phospholipase DDHD1 OS=Mus musculus OX=10090 GN=Ddhd1 PE=1 SV=1	Ddhd1
HYGESITNI	9	H-2-Kd	SB	36.56	PD Mascot	TG	10000000	TG_1c	Q80YA3	380_388	Phospholipase DDHD1 OS=Mus musculus OX=10090 GN=Ddhd1 PE=1 SV=1	Ddhd1
HYGESITNI	9	H-2-Kd	SB	36.56	Maxquant	TG	1235400	TG_2a	Q80YA3	380_388	Phospholipase DDHD1 OS=Mus musculus OX=10090 GN=Ddhd1 PE=1 SV=1	Ddhd1
HYGESITNI	9	H-2-Kd	SB	36.56	PD Mascot	HG	6500000	HG_2c	Q80YA3	380_388	Phospholipase DDHD1 OS=Mus musculus OX=10090 GN=Ddhd1 PE=1 SV=1	Ddhd1
HYGESITNI	9	H-2-Kd	SB	36.56	Maxquant	HG	825530	HG_1c	Q80YA3	380_388	Phospholipase DDHD1 OS=Mus musculus OX=10090 GN=Ddhd1 PE=1 SV=1	Ddhd1
HYGESITNI	9	H-2-Kd	SB	36.56	PD Mascot	TG	7800000	TG_1a	Q80YA3	380_388	Phospholipase DDHD1 OS=Mus musculus OX=10090 GN=Ddhd1 PE=1 SV=1	Ddhd1
HYGESITNI	9	H-2-Kd	SB	36.56	Maxquant	Control	2887800	Control_1_1a	Q80YA3	380_388	Phospholipase DDHD1 OS=Mus musculus OX=10090 GN=Ddhd1 PE=1 SV=1	Ddhd1
HYGESITNI	9	H-2-Kd	SB	36.56	PD Mascot	TG	9600000	TG_1b	Q80YA3	380_388	Phospholipase DDHD1 OS=Mus musculus OX=10090 GN=Ddhd1 PE=1 SV=1	Ddhd1
HYGESITNI	9	H-2-Kd	SB	36.56	Maxquant	TG	4141900	TG_1a	Q80YA3	380_388	Phospholipase DDHD1 OS=Mus musculus OX=10090 GN=Ddhd1 PE=1 SV=1	Ddhd1
HYGESITNI	9	H-2-Kd	SB	36.56	Maxquant	HG	4265300	HG_2b	Q80YA3	380_388	Phospholipase DDHD1 OS=Mus musculus OX=10090 GN=Ddhd1 PE=1 SV=1	Ddhd1
HYGESITNI	9	H-2-Kd	SB	36.56	Maxquant	Control	3726700	Control_1_1c	Q80YA3	380_388	Phospholipase DDHD1 OS=Mus musculus OX=10090 GN=Ddhd1 PE=1 SV=1	Ddhd1
HYGESITNI	9	H-2-Kd	SB	36.56	PD Mascot	HG	3200000	HG_2b	Q80YA3	380_388	Phospholipase DDHD1 OS=Mus musculus OX=10090 GN=Ddhd1 PE=1 SV=1	Ddhd1
HYGESITNI	9	H-2-Kd	SB	36.56	Maxquant	HG	2821700	HG_2c	Q80YA3	380_388	Phospholipase DDHD1 OS=Mus musculus OX=10090 GN=Ddhd1 PE=1 SV=1	Ddhd1
HYGESITNI	9	H-2-Kd	SB	36.56	Maxquant	HG	1071500	HG_1a	Q80YA3	380_388	Phospholipase DDHD1 OS=Mus musculus OX=10090 GN=Ddhd1 PE=1 SV=1	Ddhd1
HYLGTVTAV	9	H-2-Kd	SB	26.98	Maxquant	TG	1328500	TG_1b	Q5SUQ9	354_362	CST complex subunit CTC1 OS=Mus musculus OX=10090 GN=Ctc1 PE=1 SV=2	Ctc1
HYLGTVTAV	9	H-2-Kd	SB	26.98	Maxquant	Control	2148000	Control_1_1c	Q5SUQ9	354_362	CST complex subunit CTC1 OS=Mus musculus OX=10090 GN=Ctc1 PE=1 SV=2	Ctc1
HYLGTVTAV	9	H-2-Kd	SB	26.98	Maxquant	TG	1555500	TG_1a	Q5SUQ9	354_362	CST complex subunit CTC1 OS=Mus musculus OX=10090 GN=Ctc1 PE=1 SV=2	Ctc1
HYLGTVTAV	9	H-2-Kd	SB	26.98	Maxquant	Control	1844300	Control_1_1a	Q5SUQ9	354_362	CST complex subunit CTC1 OS=Mus musculus OX=10090 GN=Ctc1 PE=1 SV=2	Ctc1
HYLGTVTAV	9	H-2-Kd	SB	26.98	Maxquant	TG	2395700	TG_1c	Q5SUQ9	354_362	CST complex subunit CTC1 OS=Mus musculus OX=10090 GN=Ctc1 PE=1 SV=2	Ctc1
HYLGTVTAV	9	H-2-Kd	SB	26.98	Maxquant	Control	2107500	Control_1_1b	Q5SUQ9	354_362	CST complex subunit CTC1 OS=Mus musculus OX=10090 GN=Ctc1 PE=1 SV=2	Ctc1
HYQSIGSTL	9	H-2-Kd	SB	9.98	Maxquant	TG	2180300	TG_2b	A3KGS3	104_112	Ral GTPase-activating protein subunit alpha-2 OS=Mus musculus OX=10090 GN=Ralgapa2 PE=1 SV=2	Ralgapa2
HYQSIGSTL	9	H-2-Kd	SB	9.98	Maxquant	HG	5834000	HG_2c	A3KGS3	104_112	Ral GTPase-activating protein subunit alpha-2 OS=Mus musculus OX=10090 GN=Ralgapa2 PE=1 SV=2	Ralgapa2
HYQSIGSTL	9	H-2-Kd	SB	9.98	Maxquant	HG	3906600	HG_2a	A3KGS3	104_112	Ral GTPase-activating protein subunit alpha-2 OS=Mus musculus OX=10090 GN=Ralgapa2 PE=1 SV=2	Ralgapa2
HYQSIGSTL	9	H-2-Kd	SB	9.98	Maxquant	Control	751850	Control_1_2a	A3KGS3	104_112	Ral GTPase-activating protein subunit alpha-2 OS=Mus musculus OX=10090 GN=Ralgapa2 PE=1 SV=2	Ralgapa2
HYQSIGSTL	9	H-2-Kd	SB	9.98	Maxquant	Control	846080	Control_1_2c	A3KGS3	104_112	Ral GTPase-activating protein subunit alpha-2 OS=Mus musculus OX=10090 GN=Ralgapa2 PE=1 SV=2	Ralgapa2
HYQSIGSTL	9	H-2-Kd	SB	9.98	Maxquant	Control	17753000	Control_1_1b	A3KGS3	104_112	Ral GTPase-activating protein subunit alpha-2 OS=Mus musculus OX=10090 GN=Ralgapa2 PE=1 SV=2	Ralgapa2
HYQSIGSTL	9	H-2-Kd	SB	9.98	Maxquant	TG	3056200	TG_2c	A3KGS3	104_112	Ral GTPase-activating protein subunit alpha-2 OS=Mus musculus OX=10090 GN=Ralgapa2 PE=1 SV=2	Ralgapa2
HYQSIGSTL	9	H-2-Kd	SB	9.98	Maxquant	Control	1061900	Control_1_2b	A3KGS3	104_112	Ral GTPase-activating protein subunit alpha-2 OS=Mus musculus OX=10090 GN=Ralgapa2 PE=1 SV=2	Ralgapa2
HYQSIGSTL	9	H-2-Kd	SB	9.98	Maxquant	HG	5457400	HG_1b	A3KGS3	104_112	Ral GTPase-activating protein subunit alpha-2 OS=Mus musculus OX=10090 GN=Ralgapa2 PE=1 SV=2	Ralgapa2
HYQSIGSTL	9	H-2-Kd	SB	9.98	Maxquant	HG	7676800	HG_1a	A3KGS3	104_112	Ral GTPase-activating protein subunit alpha-2 OS=Mus musculus OX=10090 GN=Ralgapa2 PE=1 SV=2	Ralgapa2
HYQSIGSTL	9	H-2-Kd	SB	9.98	Maxquant	HG	7091800	HG_1c	A3KGS3	104_112	Ral GTPase-activating protein subunit alpha-2 OS=Mus musculus OX=10090 GN=Ralgapa2 PE=1 SV=2	Ralgapa2
HYQSIGSTL	9	H-2-Kd	SB	9.98	Maxquant	TG	2564200	TG_2a	A3KGS3	104_112	Ral GTPase-activating protein subunit alpha-2 OS=Mus musculus OX=10090 GN=Ralgapa2 PE=1 SV=2	Ralgapa2
HYQSIGSTL	9	H-2-Kd	SB	9.98	Maxquant	HG	5489700	HG_2b	A3KGS3	104_112	Ral GTPase-activating protein subunit alpha-2 OS=Mus musculus OX=10090 GN=Ralgapa2 PE=1 SV=2	Ralgapa2
HYQSIGSTL	9	H-2-Kd	SB	9.98	Maxquant	Control	14098000	Control_1_1c	A3KGS3	104_112	Ral GTPase-activating protein subunit alpha-2 OS=Mus musculus OX=10090 GN=Ralgapa2 PE=1 SV=2	Ralgapa2
HYQSIGSTL	9	H-2-Kd	SB	9.98	Maxquant	TG	11449000	TG_1c	A3KGS3	104_112	Ral GTPase-activating protein subunit alpha-2 OS=Mus musculus OX=10090 GN=Ralgapa2 PE=1 SV=2	Ralgapa2
HYQSIGSTL	9	H-2-Kd	SB	9.98	Maxquant	TG	10356000	TG_1a	A3KGS3	104_112	Ral GTPase-activating protein subunit alpha-2 OS=Mus musculus OX=10090 GN=Ralgapa2 PE=1 SV=2	Ralgapa2
HYQSIGSTL	9	H-2-Kd	SB	9.98	Maxquant	Control	22712000	Control_1_1a	A3KGS3	104_112	Ral GTPase-activating protein subunit alpha-2 OS=Mus musculus OX=10090 GN=Ralgapa2 PE=1 SV=2	Ralgapa2
HYQSIGSTL	9	H-2-Kd	SB	9.98	Maxquant	TG	8677900	TG_1b	A3KGS3	104_112	Ral GTPase-activating protein subunit alpha-2 OS=Mus musculus OX=10090 GN=Ralgapa2 PE=1 SV=2	Ralgapa2
HYVESLDPVT	10	H-2-Kd	WB	3360.86	PD Mascot	HG	5000000	HG_2a	Q8BK58	256_265	HSPB1-associated protein 1 OS=Mus musculus OX=10090 GN=Hspbap1 PE=1 SV=2	Hspbap1
HYVESLDPVT	10	H-2-Kd	WB	3360.86	PD Mascot	HG	13000000	HG_2b	Q8BK58	256_265	HSPB1-associated protein 1 OS=Mus musculus OX=10090 GN=Hspbap1 PE=1 SV=2	Hspbap1
HYYETPTGI	9	H-2-Kd	SB	43.49	Maxquant	Control	1122400	Control_1_1a	Q5NCF2	71_79	Trafficking protein particle complex subunit 1 OS=Mus musculus OX=10090 GN=Trappc1 PE=1 SV=1	Trappc1
HYYETPTGI	9	H-2-Kd	SB	43.49	Maxquant	TG	1931000	TG_1c	Q5NCF2	71_79	Trafficking protein particle complex subunit 1 OS=Mus musculus OX=10090 GN=Trappc1 PE=1 SV=1	Trappc1
HYYETPTGI	9	H-2-Kd	SB	43.49	PD Mascot	TG	4100000	TG_1b	Q5NCF2	71_79	Trafficking protein particle complex subunit 1 OS=Mus musculus OX=10090 GN=Trappc1 PE=1 SV=1	Trappc1
HYYETPTGI	9	H-2-Kd	SB	43.49	Maxquant	TG	2388400	TG_1a	Q5NCF2	71_79	Trafficking protein particle complex subunit 1 OS=Mus musculus OX=10090 GN=Trappc1 PE=1 SV=1	Trappc1
HYYETPTGI	9	H-2-Kd	SB	43.49	Maxquant	TG	1730600	TG_1b	Q5NCF2	71_79	Trafficking protein particle complex subunit 1 OS=Mus musculus OX=10090 GN=Trappc1 PE=1 SV=1	Trappc1
HYYETPTGI	9	H-2-Kd	SB	43.49	PD Mascot	TG	2800000	TG_1a	Q5NCF2	71_79	Trafficking protein particle complex subunit 1 OS=Mus musculus OX=10090 GN=Trappc1 PE=1 SV=1	Trappc1
HYYETPTGI	9	H-2-Kd	SB	43.49	Maxquant	HG	1326100	HG_2a	Q5NCF2	71_79	Trafficking protein particle complex subunit 1 OS=Mus musculus OX=10090 GN=Trappc1 PE=1 SV=1	Trappc1
HYYETPTGI	9	H-2-Kd	SB	43.49	Maxquant	HG	1347800	HG_2b	Q5NCF2	71_79	Trafficking protein particle complex subunit 1 OS=Mus musculus OX=10090 GN=Trappc1 PE=1 SV=1	Trappc1
HYYETPTGI	9	H-2-Kd	SB	43.49	Maxquant	HG	1564100	HG_2c	Q5NCF2	71_79	Trafficking protein particle complex subunit 1 OS=Mus musculus OX=10090 GN=Trappc1 PE=1 SV=1	Trappc1
IFDRVLTEL	9	H-2-Kd	WB	1876.18	PD Sequest	TG	6400000	TG_1b	P28700	349_357	Retinoic acid receptor RXR-alpha OS=Mus musculus OX=10090 GN=Rxra PE=1 SV=1	Rxra
IFDRVLTEL	9	H-2-Kd	WB	1876.18	PD Sequest	TG	4500000	TG_1c	P28700	349_357	Retinoic acid receptor RXR-alpha OS=Mus musculus OX=10090 GN=Rxra PE=1 SV=1	Rxra
IFDRVLTEL	9	H-2-Kd	WB	1876.18	PD Mascot	TG	4500000	TG_1c	P28700	349_357	Retinoic acid receptor RXR-alpha OS=Mus musculus OX=10090 GN=Rxra PE=1 SV=1	Rxra
IFDRVLTEL	9	H-2-Kd	WB	1876.18	PD Mascot	TG	6400000	TG_1b	P28700	349_357	Retinoic acid receptor RXR-alpha OS=Mus musculus OX=10090 GN=Rxra PE=1 SV=1	Rxra
IFSKQLNTTI	10	H-2-Db	WB	6464.3	PD Mascot	Control	2000000	Control_1_1c	Q91YU3	30_39	Myb/SANT-like DNA-binding domain-containing protein 4 OS=Mus musculus OX=10090 GN=Msantd4 PE=2 SV=1	Msantd4
IFSKQLNTTI	10	H-2-Kd	WB	2381.7	PD Mascot	Control	2000000	Control_1_1c	Q91YU3	30_39	Myb/SANT-like DNA-binding domain-containing protein 4 OS=Mus musculus OX=10090 GN=Msantd4 PE=2 SV=1	Msantd4
IFTSVRSEL	9	H-2-Kd	SB	275.89	PD Mascot	TG	3700000	TG_1a	Q3UWM4	640_648	Lysine-specific demethylase 7A OS=Mus musculus OX=10090 GN=Kdm7a PE=2 SV=2	Kdm7a
IFTSVRSEL	9	H-2-Kd	SB	275.89	PD Mascot	TG	4700000	TG_1b	Q3UWM4	640_648	Lysine-specific demethylase 7A OS=Mus musculus OX=10090 GN=Kdm7a PE=2 SV=2	Kdm7a
INITNNERVVV	11	H-2-Db	WB	6462.9	PD Mascot	TG	1200000	TG_1a	O54833	57_67	Casein kinase II subunit alpha' OS=Mus musculus OX=10090 GN=Csnk2a2 PE=1 SV=1	Csnk2a2
ISKENGDYLDV	11	H-2-Db	WB	6069.46	PD Mascot	Control	2900000	Control_1_1a	Q80Y98	461_471	Phospholipase DDHD2 OS=Mus musculus OX=10090 GN=Ddhd2 PE=1 SV=3	Ddhd2
ISKENGDYLDV	11	H-2-Db	WB	6069.46	PD Mascot	Control	2900000	Control_1_1b	Q80Y98	461_471	Phospholipase DDHD2 OS=Mus musculus OX=10090 GN=Ddhd2 PE=1 SV=3	Ddhd2
IVLTNVTKNI	10	H-2-Db	SB	1035.51	PD Mascot	TG	3600000	TG_1a	Q9CWP6	349_358	Motile sperm domain-containing protein 2 OS=Mus musculus OX=10090 GN=Mospd2 PE=1 SV=2	Mospd2
IVLTNVTKNI	10	H-2-Db	SB	1035.51	PD Mascot	TG	3000000	TG_1c	Q9CWP6	349_358	Motile sperm domain-containing protein 2 OS=Mus musculus OX=10090 GN=Mospd2 PE=1 SV=2	Mospd2
IYASSKDAI	9	H-2-Kd	SB	12.89	PD Mascot	HG	4400000	HG_1a	P45591	115_123	Cofilin-2 OS=Mus musculus OX=10090 GN=Cfl2 PE=1 SV=1	Cfl2
IYASSKDAI	9	H-2-Kd	SB	12.89	PD Mascot	Control	4500000	Control_1_1a	P45591	115_123	Cofilin-2 OS=Mus musculus OX=10090 GN=Cfl2 PE=1 SV=1	Cfl2
IYASSKDAI	9	H-2-Kd	SB	12.89	PD Mascot	HG	4200000	HG_1b	P45591	115_123	Cofilin-2 OS=Mus musculus OX=10090 GN=Cfl2 PE=1 SV=1	Cfl2
IYDKIKTGL	9	H-2-Kd	SB	324.19	PD Sequest	TG	1400000	TG_2a	O70503	113_121	Very-long-chain 3-oxoacyl-CoA reductase OS=Mus musculus OX=10090 GN=Hsd17b12 PE=1 SV=1	Hsd17b12
IYDKIKTGL	9	H-2-Kd	SB	324.19	Maxquant	Control	1315400	Control_1_1a	O70503	113_121	Very-long-chain 3-oxoacyl-CoA reductase OS=Mus musculus OX=10090 GN=Hsd17b12 PE=1 SV=1	Hsd17b12
IYDKIKTGL	9	H-2-Kd	SB	324.19	Maxquant	TG	1356200	TG_2a	O70503	113_121	Very-long-chain 3-oxoacyl-CoA reductase OS=Mus musculus OX=10090 GN=Hsd17b12 PE=1 SV=1	Hsd17b12
IYDKIKTGL	9	H-2-Kd	SB	324.19	Maxquant	HG	1036300	HG_2c	O70503	113_121	Very-long-chain 3-oxoacyl-CoA reductase OS=Mus musculus OX=10090 GN=Hsd17b12 PE=1 SV=1	Hsd17b12
IYDKIKTGL	9	H-2-Kd	SB	324.19	Maxquant	TG	3250900	TG_1c	O70503	113_121	Very-long-chain 3-oxoacyl-CoA reductase OS=Mus musculus OX=10090 GN=Hsd17b12 PE=1 SV=1	Hsd17b12
IYDKIKTGL	9	H-2-Kd	SB	324.19	PD Mascot	Control	2600000	Control_1_1b	O70503	113_121	Very-long-chain 3-oxoacyl-CoA reductase OS=Mus musculus OX=10090 GN=Hsd17b12 PE=1 SV=1	Hsd17b12
IYDKIKTGL	9	H-2-Kd	SB	324.19	Maxquant	Control	1593600	Control_1_1b	O70503	113_121	Very-long-chain 3-oxoacyl-CoA reductase OS=Mus musculus OX=10090 GN=Hsd17b12 PE=1 SV=1	Hsd17b12
IYDKIKTGL	9	H-2-Kd	SB	324.19	PD Sequest	Control	2600000	Control_1_1b	O70503	113_121	Very-long-chain 3-oxoacyl-CoA reductase OS=Mus musculus OX=10090 GN=Hsd17b12 PE=1 SV=1	Hsd17b12
IYDKIKTGL	9	H-2-Kd	SB	324.19	PD Sequest	TG	6200000	TG_1c	O70503	113_121	Very-long-chain 3-oxoacyl-CoA reductase OS=Mus musculus OX=10090 GN=Hsd17b12 PE=1 SV=1	Hsd17b12
IYDKIKTGL	9	H-2-Kd	SB	324.19	PD Mascot	Control	2200000	Control_1_1c	O70503	113_121	Very-long-chain 3-oxoacyl-CoA reductase OS=Mus musculus OX=10090 GN=Hsd17b12 PE=1 SV=1	Hsd17b12
IYDKIKTGL	9	H-2-Kd	SB	324.19	PD Sequest	Control	2200000	Control_1_1c	O70503	113_121	Very-long-chain 3-oxoacyl-CoA reductase OS=Mus musculus OX=10090 GN=Hsd17b12 PE=1 SV=1	Hsd17b12
IYDKIKTGL	9	H-2-Kd	SB	324.19	Maxquant	TG	3704400	TG_1b	O70503	113_121	Very-long-chain 3-oxoacyl-CoA reductase OS=Mus musculus OX=10090 GN=Hsd17b12 PE=1 SV=1	Hsd17b12
IYDKIKTGL	9	H-2-Kd	SB	324.19	Maxquant	Control	1406900	Control_1_1c	O70503	113_121	Very-long-chain 3-oxoacyl-CoA reductase OS=Mus musculus OX=10090 GN=Hsd17b12 PE=1 SV=1	Hsd17b12
IYDKIKTGL	9	H-2-Kd	SB	324.19	PD Sequest	TG	6100000	TG_1a	O70503	113_121	Very-long-chain 3-oxoacyl-CoA reductase OS=Mus musculus OX=10090 GN=Hsd17b12 PE=1 SV=1	Hsd17b12
IYDKIKTGL	9	H-2-Kd	SB	324.19	Maxquant	TG	2613200	TG_1a	O70503	113_121	Very-long-chain 3-oxoacyl-CoA reductase OS=Mus musculus OX=10090 GN=Hsd17b12 PE=1 SV=1	Hsd17b12
IYDKIKTGL	9	H-2-Kd	SB	324.19	Maxquant	TG	1384300	TG_2b	O70503	113_121	Very-long-chain 3-oxoacyl-CoA reductase OS=Mus musculus OX=10090 GN=Hsd17b12 PE=1 SV=1	Hsd17b12
IYDKIKTGL	9	H-2-Kd	SB	324.19	Maxquant	HG	1267500	HG_2a	O70503	113_121	Very-long-chain 3-oxoacyl-CoA reductase OS=Mus musculus OX=10090 GN=Hsd17b12 PE=1 SV=1	Hsd17b12
IYDKIKTGL	9	H-2-Kd	SB	324.19	PD Mascot	TG	6200000	TG_1c	O70503	113_121	Very-long-chain 3-oxoacyl-CoA reductase OS=Mus musculus OX=10090 GN=Hsd17b12 PE=1 SV=1	Hsd17b12
IYDKIKTGL	9	H-2-Kd	SB	324.19	PD Mascot	TG	1400000	TG_2a	O70503	113_121	Very-long-chain 3-oxoacyl-CoA reductase OS=Mus musculus OX=10090 GN=Hsd17b12 PE=1 SV=1	Hsd17b12
IYDKIKTGL	9	H-2-Kd	SB	324.19	PD Mascot	TG	6100000	TG_1a	O70503	113_121	Very-long-chain 3-oxoacyl-CoA reductase OS=Mus musculus OX=10090 GN=Hsd17b12 PE=1 SV=1	Hsd17b12
IYDKIKTGL	9	H-2-Kd	SB	324.19	Maxquant	TG	835270	TG_2c	O70503	113_121	Very-long-chain 3-oxoacyl-CoA reductase OS=Mus musculus OX=10090 GN=Hsd17b12 PE=1 SV=1	Hsd17b12
IYDKIKTGL	9	H-2-Kd	SB	324.19	Maxquant	HG	1113300	HG_2b	O70503	113_121	Very-long-chain 3-oxoacyl-CoA reductase OS=Mus musculus OX=10090 GN=Hsd17b12 PE=1 SV=1	Hsd17b12
IYDKIKTGL	9	H-2-Kd	SB	324.19	PD Mascot	TG	6400000	TG_1b	O70503	113_121	Very-long-chain 3-oxoacyl-CoA reductase OS=Mus musculus OX=10090 GN=Hsd17b12 PE=1 SV=1	Hsd17b12
IYDKIKTGL	9	H-2-Kd	SB	324.19	PD Sequest	TG	6400000	TG_1b	O70503	113_121	Very-long-chain 3-oxoacyl-CoA reductase OS=Mus musculus OX=10090 GN=Hsd17b12 PE=1 SV=1	Hsd17b12
IYEETRGVL	9	H-2-Kd	SB	416.04	Maxquant	Control	2599300	Control_1_1b	P62806	50_58	Histone H4 OS=Mus musculus OX=10090 GN=H4c1 PE=1 SV=2	H4c1
IYEETRGVL	9	H-2-Kd	SB	416.04	Maxquant	HG	1488800	HG_1b	P62806	50_58	Histone H4 OS=Mus musculus OX=10090 GN=H4c1 PE=1 SV=2	H4c1
IYEETRGVL	9	H-2-Kd	SB	416.04	PD Mascot	TG	4900000	TG_1b	P62806	50_58	Histone H4 OS=Mus musculus OX=10090 GN=H4c1 PE=1 SV=2	H4c1
IYEETRGVL	9	H-2-Kd	SB	416.04	PD Mascot	TG	3700000	TG_2b	P62806	50_58	Histone H4 OS=Mus musculus OX=10090 GN=H4c1 PE=1 SV=2	H4c1
IYEETRGVL	9	H-2-Kd	SB	416.04	Maxquant	HG	6805400	HG_2b	P62806	50_58	Histone H4 OS=Mus musculus OX=10090 GN=H4c1 PE=1 SV=2	H4c1
IYEETRGVL	9	H-2-Kd	SB	416.04	Maxquant	Control	3396400	Control_1_1a	P62806	50_58	Histone H4 OS=Mus musculus OX=10090 GN=H4c1 PE=1 SV=2	H4c1
IYEETRGVL	9	H-2-Kd	SB	416.04	Maxquant	HG	7342200	HG_2c	P62806	50_58	Histone H4 OS=Mus musculus OX=10090 GN=H4c1 PE=1 SV=2	H4c1
IYEETRGVL	9	H-2-Kd	SB	416.04	PD Mascot	HG	17000000	HG_2b	P62806	50_58	Histone H4 OS=Mus musculus OX=10090 GN=H4c1 PE=1 SV=2	H4c1
IYEETRGVL	9	H-2-Kd	SB	416.04	PD Mascot	HG	2400000	HG_1b	P62806	50_58	Histone H4 OS=Mus musculus OX=10090 GN=H4c1 PE=1 SV=2	H4c1
IYEETRGVL	9	H-2-Kd	SB	416.04	PD Mascot	HG	17000000	HG_2c	P62806	50_58	Histone H4 OS=Mus musculus OX=10090 GN=H4c1 PE=1 SV=2	H4c1
IYEETRGVL	9	H-2-Kd	SB	416.04	PD Mascot	HG	2500000	HG_1a	P62806	50_58	Histone H4 OS=Mus musculus OX=10090 GN=H4c1 PE=1 SV=2	H4c1
IYEETRGVL	9	H-2-Kd	SB	416.04	PD Mascot	TG	4300000	TG_2c	P62806	50_58	Histone H4 OS=Mus musculus OX=10090 GN=H4c1 PE=1 SV=2	H4c1
IYEETRGVL	9	H-2-Kd	SB	416.04	PD Mascot	TG	7300000	TG_1a	P62806	50_58	Histone H4 OS=Mus musculus OX=10090 GN=H4c1 PE=1 SV=2	H4c1
IYEETRGVL	9	H-2-Kd	SB	416.04	PD Mascot	HG	17000000	HG_2a	P62806	50_58	Histone H4 OS=Mus musculus OX=10090 GN=H4c1 PE=1 SV=2	H4c1
IYEETRGVL	9	H-2-Kd	SB	416.04	Maxquant	HG	6249200	HG_2a	P62806	50_58	Histone H4 OS=Mus musculus OX=10090 GN=H4c1 PE=1 SV=2	H4c1
IYEETRGVL	9	H-2-Kd	SB	416.04	Maxquant	Control	791770	Control_1_2a	P62806	50_58	Histone H4 OS=Mus musculus OX=10090 GN=H4c1 PE=1 SV=2	H4c1
IYEETRGVL	9	H-2-Kd	SB	416.04	Maxquant	HG	1522700	HG_1a	P62806	50_58	Histone H4 OS=Mus musculus OX=10090 GN=H4c1 PE=1 SV=2	H4c1
IYEETRGVL	9	H-2-Kd	SB	416.04	PD Mascot	TG	8100000	TG_1c	P62806	50_58	Histone H4 OS=Mus musculus OX=10090 GN=H4c1 PE=1 SV=2	H4c1
IYEETRGVL	9	H-2-Kd	SB	416.04	PD Mascot	Control	8600000	Control_1_1b	P62806	50_58	Histone H4 OS=Mus musculus OX=10090 GN=H4c1 PE=1 SV=2	H4c1
IYEETRGVL	9	H-2-Kd	SB	416.04	Maxquant	TG	4823100	TG_1c	P62806	50_58	Histone H4 OS=Mus musculus OX=10090 GN=H4c1 PE=1 SV=2	H4c1
IYKNSISKI	9	H-2-Kd	SB	84.17	Maxquant	TG	3141600	TG_1a	Q8VCY6	224_232	U3 small nucleolar RNA-associated protein 6 homolog OS=Mus musculus OX=10090 GN=Utp6 PE=2 SV=1	Utp6
IYKNSISKI	9	H-2-Kd	SB	84.17	Maxquant	TG	1036300	TG_2c	Q8VCY6	224_232	U3 small nucleolar RNA-associated protein 6 homolog OS=Mus musculus OX=10090 GN=Utp6 PE=2 SV=1	Utp6
IYKNSISKI	9	H-2-Kd	SB	84.17	PD Mascot	Control	3900000	Control_1_1a	Q8VCY6	224_232	U3 small nucleolar RNA-associated protein 6 homolog OS=Mus musculus OX=10090 GN=Utp6 PE=2 SV=1	Utp6
IYKNSISKI	9	H-2-Kd	SB	84.17	Maxquant	HG	1273700	HG_2a	Q8VCY6	224_232	U3 small nucleolar RNA-associated protein 6 homolog OS=Mus musculus OX=10090 GN=Utp6 PE=2 SV=1	Utp6
IYKNSISKI	9	H-2-Kd	SB	84.17	Maxquant	Control	3026200	Control_1_1c	Q8VCY6	224_232	U3 small nucleolar RNA-associated protein 6 homolog OS=Mus musculus OX=10090 GN=Utp6 PE=2 SV=1	Utp6
IYKNSISKI	9	H-2-Kd	SB	84.17	PD Sequest	Control	4200000	Control_1_1c	Q8VCY6	224_232	U3 small nucleolar RNA-associated protein 6 homolog OS=Mus musculus OX=10090 GN=Utp6 PE=2 SV=1	Utp6
IYKNSISKI	9	H-2-Kd	SB	84.17	PD Sequest	Control	3900000	Control_1_1a	Q8VCY6	224_232	U3 small nucleolar RNA-associated protein 6 homolog OS=Mus musculus OX=10090 GN=Utp6 PE=2 SV=1	Utp6
IYKNSISKI	9	H-2-Kd	SB	84.17	Maxquant	Control	3198000	Control_1_1b	Q8VCY6	224_232	U3 small nucleolar RNA-associated protein 6 homolog OS=Mus musculus OX=10090 GN=Utp6 PE=2 SV=1	Utp6
IYKNSISKI	9	H-2-Kd	SB	84.17	Maxquant	TG	2831800	TG_1c	Q8VCY6	224_232	U3 small nucleolar RNA-associated protein 6 homolog OS=Mus musculus OX=10090 GN=Utp6 PE=2 SV=1	Utp6
IYKNSISKI	9	H-2-Kd	SB	84.17	Maxquant	HG	1214200	HG_2c	Q8VCY6	224_232	U3 small nucleolar RNA-associated protein 6 homolog OS=Mus musculus OX=10090 GN=Utp6 PE=2 SV=1	Utp6
IYKNSISKI	9	H-2-Kd	SB	84.17	PD Mascot	HG	2100000	HG_2a	Q8VCY6	224_232	U3 small nucleolar RNA-associated protein 6 homolog OS=Mus musculus OX=10090 GN=Utp6 PE=2 SV=1	Utp6
IYKNSISKI	9	H-2-Kd	SB	84.17	PD Sequest	TG	5100000	TG_1b	Q8VCY6	224_232	U3 small nucleolar RNA-associated protein 6 homolog OS=Mus musculus OX=10090 GN=Utp6 PE=2 SV=1	Utp6
IYKNSISKI	9	H-2-Kd	SB	84.17	PD Sequest	Control	4500000	Control_1_1b	Q8VCY6	224_232	U3 small nucleolar RNA-associated protein 6 homolog OS=Mus musculus OX=10090 GN=Utp6 PE=2 SV=1	Utp6
IYKNSISKI	9	H-2-Kd	SB	84.17	PD Mascot	Control	4500000	Control_1_1b	Q8VCY6	224_232	U3 small nucleolar RNA-associated protein 6 homolog OS=Mus musculus OX=10090 GN=Utp6 PE=2 SV=1	Utp6
IYKNSISKI	9	H-2-Kd	SB	84.17	Maxquant	Control	1921100	Control_1_1a	Q8VCY6	224_232	U3 small nucleolar RNA-associated protein 6 homolog OS=Mus musculus OX=10090 GN=Utp6 PE=2 SV=1	Utp6
IYKNSISKI	9	H-2-Kd	SB	84.17	PD Mascot	TG	5200000	TG_1a	Q8VCY6	224_232	U3 small nucleolar RNA-associated protein 6 homolog OS=Mus musculus OX=10090 GN=Utp6 PE=2 SV=1	Utp6
IYKNSISKI	9	H-2-Kd	SB	84.17	Maxquant	HG	830220	HG_2b	Q8VCY6	224_232	U3 small nucleolar RNA-associated protein 6 homolog OS=Mus musculus OX=10090 GN=Utp6 PE=2 SV=1	Utp6
IYKNSISKI	9	H-2-Kd	SB	84.17	Maxquant	TG	1012500	TG_2a	Q8VCY6	224_232	U3 small nucleolar RNA-associated protein 6 homolog OS=Mus musculus OX=10090 GN=Utp6 PE=2 SV=1	Utp6
IYKNSISKI	9	H-2-Kd	SB	84.17	Maxquant	HG	990140	HG_1b	Q8VCY6	224_232	U3 small nucleolar RNA-associated protein 6 homolog OS=Mus musculus OX=10090 GN=Utp6 PE=2 SV=1	Utp6
IYKNSISKI	9	H-2-Kd	SB	84.17	PD Sequest	TG	5100000	TG_1c	Q8VCY6	224_232	U3 small nucleolar RNA-associated protein 6 homolog OS=Mus musculus OX=10090 GN=Utp6 PE=2 SV=1	Utp6
IYKNSISKI	9	H-2-Kd	SB	84.17	Maxquant	TG	842830	TG_2b	Q8VCY6	224_232	U3 small nucleolar RNA-associated protein 6 homolog OS=Mus musculus OX=10090 GN=Utp6 PE=2 SV=1	Utp6
IYKNSISKI	9	H-2-Kd	SB	84.17	PD Mascot	TG	5100000	TG_1b	Q8VCY6	224_232	U3 small nucleolar RNA-associated protein 6 homolog OS=Mus musculus OX=10090 GN=Utp6 PE=2 SV=1	Utp6
IYKNSISKI	9	H-2-Kd	SB	84.17	Maxquant	HG	1156500	HG_1c	Q8VCY6	224_232	U3 small nucleolar RNA-associated protein 6 homolog OS=Mus musculus OX=10090 GN=Utp6 PE=2 SV=1	Utp6
IYKNSISKI	9	H-2-Kd	SB	84.17	Maxquant	TG	2512300	TG_1b	Q8VCY6	224_232	U3 small nucleolar RNA-associated protein 6 homolog OS=Mus musculus OX=10090 GN=Utp6 PE=2 SV=1	Utp6
IYKNSISKI	9	H-2-Kd	SB	84.17	PD Mascot	TG	5100000	TG_1c	Q8VCY6	224_232	U3 small nucleolar RNA-associated protein 6 homolog OS=Mus musculus OX=10090 GN=Utp6 PE=2 SV=1	Utp6
IYKNSISKI	9	H-2-Kd	SB	84.17	PD Mascot	Control	4200000	Control_1_1c	Q8VCY6	224_232	U3 small nucleolar RNA-associated protein 6 homolog OS=Mus musculus OX=10090 GN=Utp6 PE=2 SV=1	Utp6
IYKNSISKI	9	H-2-Kd	SB	84.17	PD Sequest	TG	5200000	TG_1a	Q8VCY6	224_232	U3 small nucleolar RNA-associated protein 6 homolog OS=Mus musculus OX=10090 GN=Utp6 PE=2 SV=1	Utp6
IYNRINNDL	9	H-2-Kd	SB	121.26	Maxquant	Control	1867100	Control_1_1c	Q6P4T0	831_839	Autophagy-related protein 2 homolog A OS=Mus musculus OX=10090 GN=Atg2a PE=1 SV=2	Atg2a
IYNRINNDL	9	H-2-Kd	SB	121.26	PD Sequest	TG	2800000	TG_2c	Q6P4T0	831_839	Autophagy-related protein 2 homolog A OS=Mus musculus OX=10090 GN=Atg2a PE=1 SV=2	Atg2a
IYNRINNDL	9	H-2-Kd	SB	121.26	Maxquant	TG	3374100	TG_1b	Q6P4T0	831_839	Autophagy-related protein 2 homolog A OS=Mus musculus OX=10090 GN=Atg2a PE=1 SV=2	Atg2a
IYNRINNDL	9	H-2-Kd	SB	121.26	Maxquant	Control	1819100	Control_1_1a	Q6P4T0	831_839	Autophagy-related protein 2 homolog A OS=Mus musculus OX=10090 GN=Atg2a PE=1 SV=2	Atg2a
IYNRINNDL	9	H-2-Kd	SB	121.26	Maxquant	TG	3165400	TG_1a	Q6P4T0	831_839	Autophagy-related protein 2 homolog A OS=Mus musculus OX=10090 GN=Atg2a PE=1 SV=2	Atg2a
IYNRINNDL	9	H-2-Kd	SB	121.26	PD Sequest	TG	6600000	TG_1a	Q6P4T0	831_839	Autophagy-related protein 2 homolog A OS=Mus musculus OX=10090 GN=Atg2a PE=1 SV=2	Atg2a
IYNRINNDL	9	H-2-Kd	SB	121.26	PD Sequest	TG	7200000	TG_1b	Q6P4T0	831_839	Autophagy-related protein 2 homolog A OS=Mus musculus OX=10090 GN=Atg2a PE=1 SV=2	Atg2a
IYNRINNDL	9	H-2-Kd	SB	121.26	PD Sequest	Control	4400000	Control_1_1b	Q6P4T0	831_839	Autophagy-related protein 2 homolog A OS=Mus musculus OX=10090 GN=Atg2a PE=1 SV=2	Atg2a
IYNRINNDL	9	H-2-Kd	SB	121.26	Maxquant	HG	1449900	HG_2c	Q6P4T0	831_839	Autophagy-related protein 2 homolog A OS=Mus musculus OX=10090 GN=Atg2a PE=1 SV=2	Atg2a
IYNRINNDL	9	H-2-Kd	SB	121.26	Maxquant	HG	576490	HG_1b	Q6P4T0	831_839	Autophagy-related protein 2 homolog A OS=Mus musculus OX=10090 GN=Atg2a PE=1 SV=2	Atg2a
IYNRINNDL	9	H-2-Kd	SB	121.26	PD Mascot	Control	4400000	Control_1_1b	Q6P4T0	831_839	Autophagy-related protein 2 homolog A OS=Mus musculus OX=10090 GN=Atg2a PE=1 SV=2	Atg2a
IYNRINNDL	9	H-2-Kd	SB	121.26	Maxquant	HG	1010300	HG_2a	Q6P4T0	831_839	Autophagy-related protein 2 homolog A OS=Mus musculus OX=10090 GN=Atg2a PE=1 SV=2	Atg2a
IYNRINNDL	9	H-2-Kd	SB	121.26	PD Sequest	Control	4000000	Control_1_1a	Q6P4T0	831_839	Autophagy-related protein 2 homolog A OS=Mus musculus OX=10090 GN=Atg2a PE=1 SV=2	Atg2a
IYNRINNDL	9	H-2-Kd	SB	121.26	PD Mascot	Control	4000000	Control_1_1a	Q6P4T0	831_839	Autophagy-related protein 2 homolog A OS=Mus musculus OX=10090 GN=Atg2a PE=1 SV=2	Atg2a
IYNRINNDL	9	H-2-Kd	SB	121.26	Maxquant	HG	832470	HG_2b	Q6P4T0	831_839	Autophagy-related protein 2 homolog A OS=Mus musculus OX=10090 GN=Atg2a PE=1 SV=2	Atg2a
IYNRINNDL	9	H-2-Kd	SB	121.26	Maxquant	HG	541420	HG_1a	Q6P4T0	831_839	Autophagy-related protein 2 homolog A OS=Mus musculus OX=10090 GN=Atg2a PE=1 SV=2	Atg2a
IYNRINNDL	9	H-2-Kd	SB	121.26	PD Sequest	TG	6700000	TG_1c	Q6P4T0	831_839	Autophagy-related protein 2 homolog A OS=Mus musculus OX=10090 GN=Atg2a PE=1 SV=2	Atg2a
IYNRINNDL	9	H-2-Kd	SB	121.26	PD Mascot	TG	6700000	TG_1c	Q6P4T0	831_839	Autophagy-related protein 2 homolog A OS=Mus musculus OX=10090 GN=Atg2a PE=1 SV=2	Atg2a
IYNRINNDL	9	H-2-Kd	SB	121.26	PD Mascot	Control	4000000	Control_1_1c	Q6P4T0	831_839	Autophagy-related protein 2 homolog A OS=Mus musculus OX=10090 GN=Atg2a PE=1 SV=2	Atg2a
IYNRINNDL	9	H-2-Kd	SB	121.26	PD Mascot	TG	2200000	TG_2b	Q6P4T0	831_839	Autophagy-related protein 2 homolog A OS=Mus musculus OX=10090 GN=Atg2a PE=1 SV=2	Atg2a
IYNRINNDL	9	H-2-Kd	SB	121.26	PD Mascot	TG	2800000	TG_2c	Q6P4T0	831_839	Autophagy-related protein 2 homolog A OS=Mus musculus OX=10090 GN=Atg2a PE=1 SV=2	Atg2a
IYNRINNDL	9	H-2-Kd	SB	121.26	PD Sequest	TG	2200000	TG_2b	Q6P4T0	831_839	Autophagy-related protein 2 homolog A OS=Mus musculus OX=10090 GN=Atg2a PE=1 SV=2	Atg2a
IYNRINNDL	9	H-2-Kd	SB	121.26	Maxquant	HG	561140	HG_1c	Q6P4T0	831_839	Autophagy-related protein 2 homolog A OS=Mus musculus OX=10090 GN=Atg2a PE=1 SV=2	Atg2a
IYNRINNDL	9	H-2-Kd	SB	121.26	Maxquant	TG	2462500	TG_1c	Q6P4T0	831_839	Autophagy-related protein 2 homolog A OS=Mus musculus OX=10090 GN=Atg2a PE=1 SV=2	Atg2a
IYNRINNDL	9	H-2-Kd	SB	121.26	PD Mascot	TG	7200000	TG_1b	Q6P4T0	831_839	Autophagy-related protein 2 homolog A OS=Mus musculus OX=10090 GN=Atg2a PE=1 SV=2	Atg2a
IYNRINNDL	9	H-2-Kd	SB	121.26	PD Sequest	Control	4000000	Control_1_1c	Q6P4T0	831_839	Autophagy-related protein 2 homolog A OS=Mus musculus OX=10090 GN=Atg2a PE=1 SV=2	Atg2a
IYNRINNDL	9	H-2-Kd	SB	121.26	Maxquant	Control	2957200	Control_1_1b	Q6P4T0	831_839	Autophagy-related protein 2 homolog A OS=Mus musculus OX=10090 GN=Atg2a PE=1 SV=2	Atg2a
IYNRINNDL	9	H-2-Kd	SB	121.26	Maxquant	TG	1509900	TG_2b	Q6P4T0	831_839	Autophagy-related protein 2 homolog A OS=Mus musculus OX=10090 GN=Atg2a PE=1 SV=2	Atg2a
IYNRINNDL	9	H-2-Kd	SB	121.26	Maxquant	TG	1065700	TG_2a	Q6P4T0	831_839	Autophagy-related protein 2 homolog A OS=Mus musculus OX=10090 GN=Atg2a PE=1 SV=2	Atg2a
IYNRINNDL	9	H-2-Kd	SB	121.26	Maxquant	TG	1429400	TG_2c	Q6P4T0	831_839	Autophagy-related protein 2 homolog A OS=Mus musculus OX=10090 GN=Atg2a PE=1 SV=2	Atg2a
IYRIFRKSRVL	11	H-2-Kd	WB	2547.83	PD Sequest	HG	650000	HG_1b	Q8VE18	307_317	Protein SMG8 OS=Mus musculus OX=10090 GN=Smg8 PE=1 SV=1	Smg8
IYRIFRKSRVL	11	H-2-Kd	WB	2547.83	PD Sequest	TG	4700000	TG_1a	Q8VE18	307_317	Protein SMG8 OS=Mus musculus OX=10090 GN=Smg8 PE=1 SV=1	Smg8
IYRIFRKSRVL	11	H-2-Kd	WB	2547.83	PD Sequest	TG	3200000	TG_1c	Q8VE18	307_317	Protein SMG8 OS=Mus musculus OX=10090 GN=Smg8 PE=1 SV=1	Smg8
IYRIFRKSRVL	11	H-2-Kd	WB	2547.83	PD Sequest	TG	13000000	TG_1b	Q8VE18	307_317	Protein SMG8 OS=Mus musculus OX=10090 GN=Smg8 PE=1 SV=1	Smg8
IYVEQKQYI	9	H-2-Kd	SB	39.14	Maxquant	Control	6874800	Control_1_1b	Q62018	689_697	RNA polymerase-associated protein CTR9 homolog OS=Mus musculus OX=10090 GN=Ctr9 PE=1 SV=2	Ctr9
IYVEQKQYI	9	H-2-Kd	SB	39.14	Maxquant	TG	2328900	TG_2b	Q62018	689_697	RNA polymerase-associated protein CTR9 homolog OS=Mus musculus OX=10090 GN=Ctr9 PE=1 SV=2	Ctr9
IYVEQKQYI	9	H-2-Kd	SB	39.14	PD Mascot	TG	5500000	TG_2c	Q62018	689_697	RNA polymerase-associated protein CTR9 homolog OS=Mus musculus OX=10090 GN=Ctr9 PE=1 SV=2	Ctr9
IYVEQKQYI	9	H-2-Kd	SB	39.14	PD Mascot	TG	33000000	TG_1c	Q62018	689_697	RNA polymerase-associated protein CTR9 homolog OS=Mus musculus OX=10090 GN=Ctr9 PE=1 SV=2	Ctr9
IYVEQKQYI	9	H-2-Kd	SB	39.14	PD Mascot	TG	33000000	TG_1b	Q62018	689_697	RNA polymerase-associated protein CTR9 homolog OS=Mus musculus OX=10090 GN=Ctr9 PE=1 SV=2	Ctr9
IYVEQKQYI	9	H-2-Kd	SB	39.14	PD Sequest	Control	13000000	Control_1_1c	Q62018	689_697	RNA polymerase-associated protein CTR9 homolog OS=Mus musculus OX=10090 GN=Ctr9 PE=1 SV=2	Ctr9
IYVEQKQYI	9	H-2-Kd	SB	39.14	Maxquant	HG	7111000	HG_2c	Q62018	689_697	RNA polymerase-associated protein CTR9 homolog OS=Mus musculus OX=10090 GN=Ctr9 PE=1 SV=2	Ctr9
IYVEQKQYI	9	H-2-Kd	SB	39.14	PD Sequest	HG	16000000	HG_2a	Q62018	689_697	RNA polymerase-associated protein CTR9 homolog OS=Mus musculus OX=10090 GN=Ctr9 PE=1 SV=2	Ctr9
IYVEQKQYI	9	H-2-Kd	SB	39.14	PD Sequest	TG	33000000	TG_1b	Q62018	689_697	RNA polymerase-associated protein CTR9 homolog OS=Mus musculus OX=10090 GN=Ctr9 PE=1 SV=2	Ctr9
IYVEQKQYI	9	H-2-Kd	SB	39.14	PD Mascot	Control	13000000	Control_1_1c	Q62018	689_697	RNA polymerase-associated protein CTR9 homolog OS=Mus musculus OX=10090 GN=Ctr9 PE=1 SV=2	Ctr9
IYVEQKQYI	9	H-2-Kd	SB	39.14	PD Sequest	TG	33000000	TG_1c	Q62018	689_697	RNA polymerase-associated protein CTR9 homolog OS=Mus musculus OX=10090 GN=Ctr9 PE=1 SV=2	Ctr9
IYVEQKQYI	9	H-2-Kd	SB	39.14	Maxquant	TG	12427000	TG_1b	Q62018	689_697	RNA polymerase-associated protein CTR9 homolog OS=Mus musculus OX=10090 GN=Ctr9 PE=1 SV=2	Ctr9
IYVEQKQYI	9	H-2-Kd	SB	39.14	PD Sequest	HG	14000000	HG_2b	Q62018	689_697	RNA polymerase-associated protein CTR9 homolog OS=Mus musculus OX=10090 GN=Ctr9 PE=1 SV=2	Ctr9
IYVEQKQYI	9	H-2-Kd	SB	39.14	Maxquant	TG	2794700	TG_2a	Q62018	689_697	RNA polymerase-associated protein CTR9 homolog OS=Mus musculus OX=10090 GN=Ctr9 PE=1 SV=2	Ctr9
IYVEQKQYI	9	H-2-Kd	SB	39.14	Maxquant	Control	5230700	Control_1_1a	Q62018	689_697	RNA polymerase-associated protein CTR9 homolog OS=Mus musculus OX=10090 GN=Ctr9 PE=1 SV=2	Ctr9
IYVEQKQYI	9	H-2-Kd	SB	39.14	Maxquant	HG	7965600	HG_2a	Q62018	689_697	RNA polymerase-associated protein CTR9 homolog OS=Mus musculus OX=10090 GN=Ctr9 PE=1 SV=2	Ctr9
IYVEQKQYI	9	H-2-Kd	SB	39.14	PD Sequest	TG	5500000	TG_2c	Q62018	689_697	RNA polymerase-associated protein CTR9 homolog OS=Mus musculus OX=10090 GN=Ctr9 PE=1 SV=2	Ctr9
IYVEQKQYI	9	H-2-Kd	SB	39.14	Maxquant	TG	14293000	TG_1a	Q62018	689_697	RNA polymerase-associated protein CTR9 homolog OS=Mus musculus OX=10090 GN=Ctr9 PE=1 SV=2	Ctr9
IYVEQKQYI	9	H-2-Kd	SB	39.14	Maxquant	TG	2360000	TG_2c	Q62018	689_697	RNA polymerase-associated protein CTR9 homolog OS=Mus musculus OX=10090 GN=Ctr9 PE=1 SV=2	Ctr9
IYVEQKQYI	9	H-2-Kd	SB	39.14	Maxquant	Control	5631400	Control_1_1c	Q62018	689_697	RNA polymerase-associated protein CTR9 homolog OS=Mus musculus OX=10090 GN=Ctr9 PE=1 SV=2	Ctr9
IYVSERTEL	9	H-2-Kd	SB	61	Maxquant	TG	2189100	TG_2a	Q6P9N1	491_499	Hyccin OS=Mus musculus OX=10090 GN=Fam126a PE=1 SV=3	Fam126a
IYVSERTEL	9	H-2-Kd	SB	61	PD Sequest	Control	5000000	Control_1_1c	Q6P9N1	491_499	Hyccin OS=Mus musculus OX=10090 GN=Fam126a PE=1 SV=3	Fam126a
IYVSERTEL	9	H-2-Kd	SB	61	PD Sequest	TG	9800000	TG_1b	Q6P9N1	491_499	Hyccin OS=Mus musculus OX=10090 GN=Fam126a PE=1 SV=3	Fam126a
IYVSERTEL	9	H-2-Kd	SB	61	Maxquant	TG	1853900	TG_2c	Q6P9N1	491_499	Hyccin OS=Mus musculus OX=10090 GN=Fam126a PE=1 SV=3	Fam126a
IYVSERTEL	9	H-2-Kd	SB	61	PD Mascot	Control	5000000	Control_1_1c	Q6P9N1	491_499	Hyccin OS=Mus musculus OX=10090 GN=Fam126a PE=1 SV=3	Fam126a
IYVSERTEL	9	H-2-Kd	SB	61	PD Sequest	TG	4300000	TG_1c	Q6P9N1	491_499	Hyccin OS=Mus musculus OX=10090 GN=Fam126a PE=1 SV=3	Fam126a
IYVSERTEL	9	H-2-Kd	SB	61	Maxquant	TG	2177600	TG_2b	Q6P9N1	491_499	Hyccin OS=Mus musculus OX=10090 GN=Fam126a PE=1 SV=3	Fam126a
IYVSERTEL	9	H-2-Kd	SB	61	PD Sequest	TG	4000000	TG_2a	Q6P9N1	491_499	Hyccin OS=Mus musculus OX=10090 GN=Fam126a PE=1 SV=3	Fam126a
IYVSERTEL	9	H-2-Kd	SB	61	PD Mascot	TG	4300000	TG_1c	Q6P9N1	491_499	Hyccin OS=Mus musculus OX=10090 GN=Fam126a PE=1 SV=3	Fam126a
IYVSERTEL	9	H-2-Kd	SB	61	PD Sequest	TG	3100000	TG_2b	Q6P9N1	491_499	Hyccin OS=Mus musculus OX=10090 GN=Fam126a PE=1 SV=3	Fam126a
IYVSERTEL	9	H-2-Kd	SB	61	PD Sequest	HG	5300000	HG_2c	Q6P9N1	491_499	Hyccin OS=Mus musculus OX=10090 GN=Fam126a PE=1 SV=3	Fam126a
IYVSERTEL	9	H-2-Kd	SB	61	Maxquant	HG	2558300	HG_2b	Q6P9N1	491_499	Hyccin OS=Mus musculus OX=10090 GN=Fam126a PE=1 SV=3	Fam126a
IYVSERTEL	9	H-2-Kd	SB	61	PD Sequest	TG	3600000	TG_2c	Q6P9N1	491_499	Hyccin OS=Mus musculus OX=10090 GN=Fam126a PE=1 SV=3	Fam126a
IYVSERTEL	9	H-2-Kd	SB	61	PD Mascot	TG	9800000	TG_1b	Q6P9N1	491_499	Hyccin OS=Mus musculus OX=10090 GN=Fam126a PE=1 SV=3	Fam126a
IYVSERTEL	9	H-2-Kd	SB	61	PD Sequest	HG	5700000	HG_2a	Q6P9N1	491_499	Hyccin OS=Mus musculus OX=10090 GN=Fam126a PE=1 SV=3	Fam126a
IYVSERTEL	9	H-2-Kd	SB	61	PD Sequest	HG	5300000	HG_2b	Q6P9N1	491_499	Hyccin OS=Mus musculus OX=10090 GN=Fam126a PE=1 SV=3	Fam126a
IYVSERTEL	9	H-2-Kd	SB	61	PD Mascot	HG	5300000	HG_2b	Q6P9N1	491_499	Hyccin OS=Mus musculus OX=10090 GN=Fam126a PE=1 SV=3	Fam126a
IYVSERTEL	9	H-2-Kd	SB	61	PD Mascot	TG	6500000	TG_1a	Q6P9N1	491_499	Hyccin OS=Mus musculus OX=10090 GN=Fam126a PE=1 SV=3	Fam126a
IYVSERTEL	9	H-2-Kd	SB	61	PD Mascot	TG	3600000	TG_2c	Q6P9N1	491_499	Hyccin OS=Mus musculus OX=10090 GN=Fam126a PE=1 SV=3	Fam126a
IYVSERTEL	9	H-2-Kd	SB	61	PD Mascot	TG	4000000	TG_2a	Q6P9N1	491_499	Hyccin OS=Mus musculus OX=10090 GN=Fam126a PE=1 SV=3	Fam126a
IYVSERTEL	9	H-2-Kd	SB	61	Maxquant	TG	6029400	TG_1a	Q6P9N1	491_499	Hyccin OS=Mus musculus OX=10090 GN=Fam126a PE=1 SV=3	Fam126a
IYVSERTEL	9	H-2-Kd	SB	61	Maxquant	HG	2949300	HG_2a	Q6P9N1	491_499	Hyccin OS=Mus musculus OX=10090 GN=Fam126a PE=1 SV=3	Fam126a
IYVSERTEL	9	H-2-Kd	SB	61	PD Mascot	HG	5700000	HG_2a	Q6P9N1	491_499	Hyccin OS=Mus musculus OX=10090 GN=Fam126a PE=1 SV=3	Fam126a
IYVSERTEL	9	H-2-Kd	SB	61	Maxquant	Control	3538200	Control_1_1c	Q6P9N1	491_499	Hyccin OS=Mus musculus OX=10090 GN=Fam126a PE=1 SV=3	Fam126a
IYVSERTEL	9	H-2-Kd	SB	61	Maxquant	HG	3217000	HG_2c	Q6P9N1	491_499	Hyccin OS=Mus musculus OX=10090 GN=Fam126a PE=1 SV=3	Fam126a
IYVSERTEL	9	H-2-Kd	SB	61	Maxquant	TG	8979200	TG_1b	Q6P9N1	491_499	Hyccin OS=Mus musculus OX=10090 GN=Fam126a PE=1 SV=3	Fam126a
IYVSERTEL	9	H-2-Kd	SB	61	PD Sequest	TG	6500000	TG_1a	Q6P9N1	491_499	Hyccin OS=Mus musculus OX=10090 GN=Fam126a PE=1 SV=3	Fam126a
IYVSERTEL	9	H-2-Kd	SB	61	PD Mascot	TG	3100000	TG_2b	Q6P9N1	491_499	Hyccin OS=Mus musculus OX=10090 GN=Fam126a PE=1 SV=3	Fam126a
KAIETVHNL	9	H-2-Db	WB	3782.28	PD Sequest	HG	9900000	HG_2b	Q922L6	388_396	Negative elongation factor D OS=Mus musculus OX=10090 GN=Nelfcd PE=1 SV=2	Nelfcd
KAIETVHNL	9	H-2-Db	WB	3782.28	PD Sequest	HG	9400000	HG_2c	Q922L6	388_396	Negative elongation factor D OS=Mus musculus OX=10090 GN=Nelfcd PE=1 SV=2	Nelfcd
KAIETVHNL	9	H-2-Db	WB	3782.28	Maxquant	TG	1858500	TG_2a	Q922L6	388_396	Negative elongation factor D OS=Mus musculus OX=10090 GN=Nelfcd PE=1 SV=2	Nelfcd
KAIETVHNL	9	H-2-Db	WB	3782.28	PD Sequest	HG	10000000	HG_2a	Q922L6	388_396	Negative elongation factor D OS=Mus musculus OX=10090 GN=Nelfcd PE=1 SV=2	Nelfcd
KAIETVHNL	9	H-2-Db	WB	3782.28	PD Mascot	TG	3200000	TG_2b	Q922L6	388_396	Negative elongation factor D OS=Mus musculus OX=10090 GN=Nelfcd PE=1 SV=2	Nelfcd
KAIETVHNL	9	H-2-Db	WB	3782.28	PD Sequest	TG	9100000	TG_1a	Q922L6	388_396	Negative elongation factor D OS=Mus musculus OX=10090 GN=Nelfcd PE=1 SV=2	Nelfcd
KAIETVHNL	9	H-2-Db	WB	3782.28	Maxquant	TG	3888700	TG_1b	Q922L6	388_396	Negative elongation factor D OS=Mus musculus OX=10090 GN=Nelfcd PE=1 SV=2	Nelfcd
KAIETVHNL	9	H-2-Db	WB	3782.28	Maxquant	TG	4266400	TG_1a	Q922L6	388_396	Negative elongation factor D OS=Mus musculus OX=10090 GN=Nelfcd PE=1 SV=2	Nelfcd
KAIETVHNL	9	H-2-Db	WB	3782.28	Maxquant	TG	1478800	TG_2c	Q922L6	388_396	Negative elongation factor D OS=Mus musculus OX=10090 GN=Nelfcd PE=1 SV=2	Nelfcd
KAIETVHNL	9	H-2-Db	WB	3782.28	PD Sequest	TG	3300000	TG_2a	Q922L6	388_396	Negative elongation factor D OS=Mus musculus OX=10090 GN=Nelfcd PE=1 SV=2	Nelfcd
KAIETVHNL	9	H-2-Db	WB	3782.28	PD Sequest	Control	17000000	Control_1_1a	Q922L6	388_396	Negative elongation factor D OS=Mus musculus OX=10090 GN=Nelfcd PE=1 SV=2	Nelfcd
KAIETVHNL	9	H-2-Db	WB	3782.28	PD Mascot	HG	9900000	HG_2b	Q922L6	388_396	Negative elongation factor D OS=Mus musculus OX=10090 GN=Nelfcd PE=1 SV=2	Nelfcd
KAIETVHNL	9	H-2-Db	WB	3782.28	PD Mascot	TG	2900000	TG_2c	Q922L6	388_396	Negative elongation factor D OS=Mus musculus OX=10090 GN=Nelfcd PE=1 SV=2	Nelfcd
KAIETVHNL	9	H-2-Db	WB	3782.28	PD Mascot	TG	8700000	TG_1b	Q922L6	388_396	Negative elongation factor D OS=Mus musculus OX=10090 GN=Nelfcd PE=1 SV=2	Nelfcd
KAIETVHNL	9	H-2-Db	WB	3782.28	PD Sequest	TG	8700000	TG_1b	Q922L6	388_396	Negative elongation factor D OS=Mus musculus OX=10090 GN=Nelfcd PE=1 SV=2	Nelfcd
KAIETVHNL	9	H-2-Db	WB	3782.28	Maxquant	HG	4938400	HG_2b	Q922L6	388_396	Negative elongation factor D OS=Mus musculus OX=10090 GN=Nelfcd PE=1 SV=2	Nelfcd
KAIETVHNL	9	H-2-Db	WB	3782.28	Maxquant	Control	6238800	Control_1_1c	Q922L6	388_396	Negative elongation factor D OS=Mus musculus OX=10090 GN=Nelfcd PE=1 SV=2	Nelfcd
KAIETVHNL	9	H-2-Db	WB	3782.28	PD Sequest	Control	18000000	Control_1_1b	Q922L6	388_396	Negative elongation factor D OS=Mus musculus OX=10090 GN=Nelfcd PE=1 SV=2	Nelfcd
KAIETVHNL	9	H-2-Db	WB	3782.28	PD Mascot	TG	9100000	TG_1a	Q922L6	388_396	Negative elongation factor D OS=Mus musculus OX=10090 GN=Nelfcd PE=1 SV=2	Nelfcd
KAIETVHNL	9	H-2-Db	WB	3782.28	PD Sequest	Control	15000000	Control_1_1c	Q922L6	388_396	Negative elongation factor D OS=Mus musculus OX=10090 GN=Nelfcd PE=1 SV=2	Nelfcd
KAIETVHNL	9	H-2-Db	WB	3782.28	PD Sequest	HG	12000000	HG_1a	Q922L6	388_396	Negative elongation factor D OS=Mus musculus OX=10090 GN=Nelfcd PE=1 SV=2	Nelfcd
KAIETVHNL	9	H-2-Db	WB	3782.28	PD Mascot	Control	18000000	Control_1_1b	Q922L6	388_396	Negative elongation factor D OS=Mus musculus OX=10090 GN=Nelfcd PE=1 SV=2	Nelfcd
KAIETVHNL	9	H-2-Db	WB	3782.28	PD Mascot	Control	15000000	Control_1_1c	Q922L6	388_396	Negative elongation factor D OS=Mus musculus OX=10090 GN=Nelfcd PE=1 SV=2	Nelfcd
KAIETVHNL	9	H-2-Db	WB	3782.28	Maxquant	HG	4207900	HG_1c	Q922L6	388_396	Negative elongation factor D OS=Mus musculus OX=10090 GN=Nelfcd PE=1 SV=2	Nelfcd
KAIETVHNL	9	H-2-Db	WB	3782.28	PD Mascot	HG	8400000	HG_1c	Q922L6	388_396	Negative elongation factor D OS=Mus musculus OX=10090 GN=Nelfcd PE=1 SV=2	Nelfcd
KAIETVHNL	9	H-2-Db	WB	3782.28	PD Mascot	HG	9400000	HG_2c	Q922L6	388_396	Negative elongation factor D OS=Mus musculus OX=10090 GN=Nelfcd PE=1 SV=2	Nelfcd
KAIETVHNL	9	H-2-Db	WB	3782.28	Maxquant	HG	4903400	HG_1a	Q922L6	388_396	Negative elongation factor D OS=Mus musculus OX=10090 GN=Nelfcd PE=1 SV=2	Nelfcd
KAIETVHNL	9	H-2-Db	WB	3782.28	Maxquant	HG	4598700	HG_2c	Q922L6	388_396	Negative elongation factor D OS=Mus musculus OX=10090 GN=Nelfcd PE=1 SV=2	Nelfcd
KAIETVHNL	9	H-2-Db	WB	3782.28	PD Mascot	HG	9500000	HG_1b	Q922L6	388_396	Negative elongation factor D OS=Mus musculus OX=10090 GN=Nelfcd PE=1 SV=2	Nelfcd
KAIETVHNL	9	H-2-Db	WB	3782.28	PD Mascot	TG	3300000	TG_2a	Q922L6	388_396	Negative elongation factor D OS=Mus musculus OX=10090 GN=Nelfcd PE=1 SV=2	Nelfcd
KAIETVHNL	9	H-2-Db	WB	3782.28	Maxquant	Control	5509000	Control_1_1a	Q922L6	388_396	Negative elongation factor D OS=Mus musculus OX=10090 GN=Nelfcd PE=1 SV=2	Nelfcd
KAIETVHNL	9	H-2-Db	WB	3782.28	PD Mascot	Control	17000000	Control_1_1a	Q922L6	388_396	Negative elongation factor D OS=Mus musculus OX=10090 GN=Nelfcd PE=1 SV=2	Nelfcd
KAIETVHNL	9	H-2-Db	WB	3782.28	Maxquant	TG	1969700	TG_2b	Q922L6	388_396	Negative elongation factor D OS=Mus musculus OX=10090 GN=Nelfcd PE=1 SV=2	Nelfcd
KAIETVHNL	9	H-2-Db	WB	3782.28	Maxquant	Control	6599000	Control_1_1b	Q922L6	388_396	Negative elongation factor D OS=Mus musculus OX=10090 GN=Nelfcd PE=1 SV=2	Nelfcd
KAIETVHNL	9	H-2-Db	WB	3782.28	Maxquant	HG	9853400	HG_2a	Q922L6	388_396	Negative elongation factor D OS=Mus musculus OX=10090 GN=Nelfcd PE=1 SV=2	Nelfcd
KAIETVHNL	9	H-2-Db	WB	3782.28	PD Mascot	HG	12000000	HG_1a	Q922L6	388_396	Negative elongation factor D OS=Mus musculus OX=10090 GN=Nelfcd PE=1 SV=2	Nelfcd
KAIETVHNL	9	H-2-Db	WB	3782.28	PD Mascot	HG	10000000	HG_2a	Q922L6	388_396	Negative elongation factor D OS=Mus musculus OX=10090 GN=Nelfcd PE=1 SV=2	Nelfcd
KAIETVHNL	9	H-2-Db	WB	3782.28	Maxquant	Control	974240	Control_1_2c	Q922L6	388_396	Negative elongation factor D OS=Mus musculus OX=10090 GN=Nelfcd PE=1 SV=2	Nelfcd
KAIETVHNL	9	H-2-Db	WB	3782.28	PD Sequest	TG	2900000	TG_2c	Q922L6	388_396	Negative elongation factor D OS=Mus musculus OX=10090 GN=Nelfcd PE=1 SV=2	Nelfcd
KAIETVHNL	9	H-2-Db	WB	3782.28	PD Sequest	TG	3200000	TG_2b	Q922L6	388_396	Negative elongation factor D OS=Mus musculus OX=10090 GN=Nelfcd PE=1 SV=2	Nelfcd
KAIETVHNL	9	H-2-Db	WB	3782.28	Maxquant	TG	4150800	TG_1c	Q922L6	388_396	Negative elongation factor D OS=Mus musculus OX=10090 GN=Nelfcd PE=1 SV=2	Nelfcd
KAIETVHNL	9	H-2-Db	WB	3782.28	PD Sequest	HG	8400000	HG_1c	Q922L6	388_396	Negative elongation factor D OS=Mus musculus OX=10090 GN=Nelfcd PE=1 SV=2	Nelfcd
KAIETVHNL	9	H-2-Db	WB	3782.28	Maxquant	HG	4650000	HG_1b	Q922L6	388_396	Negative elongation factor D OS=Mus musculus OX=10090 GN=Nelfcd PE=1 SV=2	Nelfcd
KAIETVHNL	9	H-2-Db	WB	3782.28	PD Sequest	HG	9500000	HG_1b	Q922L6	388_396	Negative elongation factor D OS=Mus musculus OX=10090 GN=Nelfcd PE=1 SV=2	Nelfcd
KALINADEL	9	H-2-Db	SB	5.48	Maxquant	HG	1048500	HG_2c	P16546	380_388	Spectrin alpha chain, non-erythrocytic 1 OS=Mus musculus OX=10090 GN=Sptan1 PE=1 SV=4	Sptan1
KALINADEL	9	H-2-Db	SB	5.48	Maxquant	TG	1649800	TG_2b	P16546	380_388	Spectrin alpha chain, non-erythrocytic 1 OS=Mus musculus OX=10090 GN=Sptan1 PE=1 SV=4	Sptan1
KALINADEL	9	H-2-Db	SB	5.48	PD Sequest	TG	2100000	TG_2b	P16546	380_388	Spectrin alpha chain, non-erythrocytic 1 OS=Mus musculus OX=10090 GN=Sptan1 PE=1 SV=4	Sptan1
KALINADEL	9	H-2-Db	SB	5.48	PD Sequest	TG	3100000	TG_2c	P16546	380_388	Spectrin alpha chain, non-erythrocytic 1 OS=Mus musculus OX=10090 GN=Sptan1 PE=1 SV=4	Sptan1
KALINADEL	9	H-2-Db	SB	5.48	Maxquant	TG	1426500	TG_2a	P16546	380_388	Spectrin alpha chain, non-erythrocytic 1 OS=Mus musculus OX=10090 GN=Sptan1 PE=1 SV=4	Sptan1
KALINADEL	9	H-2-Db	SB	5.48	PD Sequest	TG	1800000	TG_2a	P16546	380_388	Spectrin alpha chain, non-erythrocytic 1 OS=Mus musculus OX=10090 GN=Sptan1 PE=1 SV=4	Sptan1
KALINADEL	9	H-2-Db	SB	5.48	Maxquant	HG	925040	HG_2a	P16546	380_388	Spectrin alpha chain, non-erythrocytic 1 OS=Mus musculus OX=10090 GN=Sptan1 PE=1 SV=4	Sptan1
KALINADEL	9	H-2-Db	SB	5.48	Maxquant	TG	3308600	TG_1a	P16546	380_388	Spectrin alpha chain, non-erythrocytic 1 OS=Mus musculus OX=10090 GN=Sptan1 PE=1 SV=4	Sptan1
KALINADEL	9	H-2-Db	SB	5.48	Maxquant	TG	1607900	TG_2c	P16546	380_388	Spectrin alpha chain, non-erythrocytic 1 OS=Mus musculus OX=10090 GN=Sptan1 PE=1 SV=4	Sptan1
KALINADEL	9	H-2-Db	SB	5.48	PD Sequest	TG	5300000	TG_1a	P16546	380_388	Spectrin alpha chain, non-erythrocytic 1 OS=Mus musculus OX=10090 GN=Sptan1 PE=1 SV=4	Sptan1
KALINADEL	9	H-2-Db	SB	5.48	Maxquant	HG	992590	HG_2b	P16546	380_388	Spectrin alpha chain, non-erythrocytic 1 OS=Mus musculus OX=10090 GN=Sptan1 PE=1 SV=4	Sptan1
KALINADEL	9	H-2-Db	SB	5.48	Maxquant	Control	1160600	Control_1_1c	P16546	380_388	Spectrin alpha chain, non-erythrocytic 1 OS=Mus musculus OX=10090 GN=Sptan1 PE=1 SV=4	Sptan1
KALINADEL	9	H-2-Db	SB	5.48	Maxquant	TG	4605600	TG_1b	P16546	380_388	Spectrin alpha chain, non-erythrocytic 1 OS=Mus musculus OX=10090 GN=Sptan1 PE=1 SV=4	Sptan1
KALINADEL	9	H-2-Db	SB	5.48	PD Sequest	TG	5100000	TG_1b	P16546	380_388	Spectrin alpha chain, non-erythrocytic 1 OS=Mus musculus OX=10090 GN=Sptan1 PE=1 SV=4	Sptan1
KFHPNGSTL	9	H-2-Db	WB	5439.03	PD Mascot	Control	6900000	Control_1_1b	Q6PE01	73_81	U5 small nuclear ribonucleoprotein 40 kDa protein OS=Mus musculus OX=10090 GN=Snrnp40 PE=1 SV=1	Snrnp40
KFHPNGSTL	9	H-2-Db	WB	5439.03	PD Mascot	Control	6700000	Control_1_1c	Q6PE01	73_81	U5 small nuclear ribonucleoprotein 40 kDa protein OS=Mus musculus OX=10090 GN=Snrnp40 PE=1 SV=1	Snrnp40
KFHPNGSTL	9	H-2-Kd	SB	162.26	PD Mascot	Control	6900000	Control_1_1b	Q6PE01	73_81	U5 small nuclear ribonucleoprotein 40 kDa protein OS=Mus musculus OX=10090 GN=Snrnp40 PE=1 SV=1	Snrnp40
KFHPNGSTL	9	H-2-Kd	SB	162.26	PD Mascot	Control	6700000	Control_1_1c	Q6PE01	73_81	U5 small nuclear ribonucleoprotein 40 kDa protein OS=Mus musculus OX=10090 GN=Snrnp40 PE=1 SV=1	Snrnp40
KFHPNGSTL	9	H-2-Kd	SB	162.26	PD Mascot	HG	4800000	HG_1b	Q6PE01	73_81	U5 small nuclear ribonucleoprotein 40 kDa protein OS=Mus musculus OX=10090 GN=Snrnp40 PE=1 SV=1	Snrnp40
KFHPNGSTL	9	H-2-Db	WB	5439.03	PD Mascot	HG	4800000	HG_1b	Q6PE01	73_81	U5 small nuclear ribonucleoprotein 40 kDa protein OS=Mus musculus OX=10090 GN=Snrnp40 PE=1 SV=1	Snrnp40
KFLAAGTHL	9	H-2-Kd	SB	39.66	PD Sequest	TG	2500000	TG_1c	P14206	16_24	40S ribosomal protein SA OS=Mus musculus OX=10090 GN=Rpsa PE=1 SV=4	Rpsa
KFLAAGTHL	9	H-2-Kd	SB	39.66	PD Mascot	TG	2500000	TG_1c	P14206	16_24	40S ribosomal protein SA OS=Mus musculus OX=10090 GN=Rpsa PE=1 SV=4	Rpsa
KFVDGVSTV	9	H-2-Kd	SB	602.08	PD Sequest	Control	43000000	Control_1_1a	Q8CG48	1159_1167	Structural maintenance of chromosomes protein 2 OS=Mus musculus OX=10090 GN=Smc2 PE=1 SV=2	Smc2
KFVDGVSTV	9	H-2-Kd	SB	602.08	Maxquant	HG	12954000	HG_2b	Q8CG48	1159_1167	Structural maintenance of chromosomes protein 2 OS=Mus musculus OX=10090 GN=Smc2 PE=1 SV=2	Smc2
KFVDGVSTV	9	H-2-Kd	SB	602.08	Maxquant	TG	4613900	TG_2b	Q8CG48	1159_1167	Structural maintenance of chromosomes protein 2 OS=Mus musculus OX=10090 GN=Smc2 PE=1 SV=2	Smc2
KFVDGVSTV	9	H-2-Kd	SB	602.08	PD Sequest	HG	31000000	HG_2b	Q8CG48	1159_1167	Structural maintenance of chromosomes protein 2 OS=Mus musculus OX=10090 GN=Smc2 PE=1 SV=2	Smc2
KFVDGVSTV	9	H-2-Kd	SB	602.08	PD Mascot	Control	44000000	Control_1_1b	Q8CG48	1159_1167	Structural maintenance of chromosomes protein 2 OS=Mus musculus OX=10090 GN=Smc2 PE=1 SV=2	Smc2
KFVDGVSTV	9	H-2-Kd	SB	602.08	Maxquant	TG	4472300	TG_2a	Q8CG48	1159_1167	Structural maintenance of chromosomes protein 2 OS=Mus musculus OX=10090 GN=Smc2 PE=1 SV=2	Smc2
KFVDGVSTV	9	H-2-Kd	SB	602.08	Maxquant	TG	9423400	TG_1a	Q8CG48	1159_1167	Structural maintenance of chromosomes protein 2 OS=Mus musculus OX=10090 GN=Smc2 PE=1 SV=2	Smc2
KFVDGVSTV	9	H-2-Kd	SB	602.08	Maxquant	HG	666480	HG_2c	Q8CG48	1159_1167	Structural maintenance of chromosomes protein 2 OS=Mus musculus OX=10090 GN=Smc2 PE=1 SV=2	Smc2
KFVDGVSTV	9	H-2-Kd	SB	602.08	Maxquant	HG	11668000	HG_1c	Q8CG48	1159_1167	Structural maintenance of chromosomes protein 2 OS=Mus musculus OX=10090 GN=Smc2 PE=1 SV=2	Smc2
KFVDGVSTV	9	H-2-Kd	SB	602.08	PD Sequest	TG	25000000	TG_1b	Q8CG48	1159_1167	Structural maintenance of chromosomes protein 2 OS=Mus musculus OX=10090 GN=Smc2 PE=1 SV=2	Smc2
KFVDGVSTV	9	H-2-Kd	SB	602.08	PD Mascot	HG	29000000	HG_2c	Q8CG48	1159_1167	Structural maintenance of chromosomes protein 2 OS=Mus musculus OX=10090 GN=Smc2 PE=1 SV=2	Smc2
KFVDGVSTV	9	H-2-Kd	SB	602.08	PD Mascot	HG	31000000	HG_2b	Q8CG48	1159_1167	Structural maintenance of chromosomes protein 2 OS=Mus musculus OX=10090 GN=Smc2 PE=1 SV=2	Smc2
KFVDGVSTV	9	H-2-Kd	SB	602.08	PD Mascot	HG	28000000	HG_1b	Q8CG48	1159_1167	Structural maintenance of chromosomes protein 2 OS=Mus musculus OX=10090 GN=Smc2 PE=1 SV=2	Smc2
KFVDGVSTV	9	H-2-Kd	SB	602.08	PD Mascot	Control	44000000	Control_1_1c	Q8CG48	1159_1167	Structural maintenance of chromosomes protein 2 OS=Mus musculus OX=10090 GN=Smc2 PE=1 SV=2	Smc2
KFVDGVSTV	9	H-2-Kd	SB	602.08	PD Sequest	TG	9900000	TG_2b	Q8CG48	1159_1167	Structural maintenance of chromosomes protein 2 OS=Mus musculus OX=10090 GN=Smc2 PE=1 SV=2	Smc2
KFVDGVSTV	9	H-2-Kd	SB	602.08	Maxquant	Control	18059000	Control_1_1c	Q8CG48	1159_1167	Structural maintenance of chromosomes protein 2 OS=Mus musculus OX=10090 GN=Smc2 PE=1 SV=2	Smc2
KFVDGVSTV	9	H-2-Kd	SB	602.08	PD Sequest	TG	24000000	TG_1a	Q8CG48	1159_1167	Structural maintenance of chromosomes protein 2 OS=Mus musculus OX=10090 GN=Smc2 PE=1 SV=2	Smc2
KFVDGVSTV	9	H-2-Kd	SB	602.08	Maxquant	Control	18136000	Control_1_1b	Q8CG48	1159_1167	Structural maintenance of chromosomes protein 2 OS=Mus musculus OX=10090 GN=Smc2 PE=1 SV=2	Smc2
KFVDGVSTV	9	H-2-Kd	SB	602.08	Maxquant	HG	12016000	HG_2a	Q8CG48	1159_1167	Structural maintenance of chromosomes protein 2 OS=Mus musculus OX=10090 GN=Smc2 PE=1 SV=2	Smc2
KFVDGVSTV	9	H-2-Kd	SB	602.08	PD Sequest	TG	24000000	TG_1c	Q8CG48	1159_1167	Structural maintenance of chromosomes protein 2 OS=Mus musculus OX=10090 GN=Smc2 PE=1 SV=2	Smc2
KFVDGVSTV	9	H-2-Kd	SB	602.08	PD Sequest	HG	29000000	HG_2c	Q8CG48	1159_1167	Structural maintenance of chromosomes protein 2 OS=Mus musculus OX=10090 GN=Smc2 PE=1 SV=2	Smc2
KFVDGVSTV	9	H-2-Kd	SB	602.08	PD Mascot	TG	9900000	TG_2b	Q8CG48	1159_1167	Structural maintenance of chromosomes protein 2 OS=Mus musculus OX=10090 GN=Smc2 PE=1 SV=2	Smc2
KFVDGVSTV	9	H-2-Kd	SB	602.08	Maxquant	HG	13549000	HG_1a	Q8CG48	1159_1167	Structural maintenance of chromosomes protein 2 OS=Mus musculus OX=10090 GN=Smc2 PE=1 SV=2	Smc2
KFVDGVSTV	9	H-2-Kd	SB	602.08	Maxquant	HG	15444000	HG_1b	Q8CG48	1159_1167	Structural maintenance of chromosomes protein 2 OS=Mus musculus OX=10090 GN=Smc2 PE=1 SV=2	Smc2
KFVDGVSTV	9	H-2-Kd	SB	602.08	PD Sequest	HG	27000000	HG_1c	Q8CG48	1159_1167	Structural maintenance of chromosomes protein 2 OS=Mus musculus OX=10090 GN=Smc2 PE=1 SV=2	Smc2
KFVDGVSTV	9	H-2-Kd	SB	602.08	PD Sequest	HG	27000000	HG_2a	Q8CG48	1159_1167	Structural maintenance of chromosomes protein 2 OS=Mus musculus OX=10090 GN=Smc2 PE=1 SV=2	Smc2
KFVDGVSTV	9	H-2-Kd	SB	602.08	PD Sequest	Control	44000000	Control_1_1b	Q8CG48	1159_1167	Structural maintenance of chromosomes protein 2 OS=Mus musculus OX=10090 GN=Smc2 PE=1 SV=2	Smc2
KFVDGVSTV	9	H-2-Kd	SB	602.08	Maxquant	TG	9167400	TG_1b	Q8CG48	1159_1167	Structural maintenance of chromosomes protein 2 OS=Mus musculus OX=10090 GN=Smc2 PE=1 SV=2	Smc2
KFVDGVSTV	9	H-2-Kd	SB	602.08	PD Sequest	HG	31000000	HG_1a	Q8CG48	1159_1167	Structural maintenance of chromosomes protein 2 OS=Mus musculus OX=10090 GN=Smc2 PE=1 SV=2	Smc2
KFVDGVSTV	9	H-2-Kd	SB	602.08	PD Sequest	Control	11000000	Control_1_2c	Q8CG48	1159_1167	Structural maintenance of chromosomes protein 2 OS=Mus musculus OX=10090 GN=Smc2 PE=1 SV=2	Smc2
KFVDGVSTV	9	H-2-Kd	SB	602.08	PD Sequest	HG	28000000	HG_1b	Q8CG48	1159_1167	Structural maintenance of chromosomes protein 2 OS=Mus musculus OX=10090 GN=Smc2 PE=1 SV=2	Smc2
KFVDGVSTV	9	H-2-Kd	SB	602.08	PD Sequest	Control	11000000	Control_1_2b	Q8CG48	1159_1167	Structural maintenance of chromosomes protein 2 OS=Mus musculus OX=10090 GN=Smc2 PE=1 SV=2	Smc2
KFVDGVSTV	9	H-2-Kd	SB	602.08	Maxquant	Control	4965300	Control_1_2a	Q8CG48	1159_1167	Structural maintenance of chromosomes protein 2 OS=Mus musculus OX=10090 GN=Smc2 PE=1 SV=2	Smc2
KFVDGVSTV	9	H-2-Kd	SB	602.08	PD Sequest	Control	10000000	Control_1_2a	Q8CG48	1159_1167	Structural maintenance of chromosomes protein 2 OS=Mus musculus OX=10090 GN=Smc2 PE=1 SV=2	Smc2
KFVDGVSTV	9	H-2-Kd	SB	602.08	PD Sequest	TG	9800000	TG_2c	Q8CG48	1159_1167	Structural maintenance of chromosomes protein 2 OS=Mus musculus OX=10090 GN=Smc2 PE=1 SV=2	Smc2
KFVDGVSTV	9	H-2-Kd	SB	602.08	PD Mascot	HG	31000000	HG_1a	Q8CG48	1159_1167	Structural maintenance of chromosomes protein 2 OS=Mus musculus OX=10090 GN=Smc2 PE=1 SV=2	Smc2
KFVDGVSTV	9	H-2-Kd	SB	602.08	Maxquant	Control	6429500	Control_1_2b	Q8CG48	1159_1167	Structural maintenance of chromosomes protein 2 OS=Mus musculus OX=10090 GN=Smc2 PE=1 SV=2	Smc2
KFVDGVSTV	9	H-2-Kd	SB	602.08	Maxquant	TG	4069600	TG_2c	Q8CG48	1159_1167	Structural maintenance of chromosomes protein 2 OS=Mus musculus OX=10090 GN=Smc2 PE=1 SV=2	Smc2
KFVDGVSTV	9	H-2-Kd	SB	602.08	PD Sequest	TG	11000000	TG_2a	Q8CG48	1159_1167	Structural maintenance of chromosomes protein 2 OS=Mus musculus OX=10090 GN=Smc2 PE=1 SV=2	Smc2
KFVDGVSTV	9	H-2-Kd	SB	602.08	Maxquant	Control	4930800	Control_1_2c	Q8CG48	1159_1167	Structural maintenance of chromosomes protein 2 OS=Mus musculus OX=10090 GN=Smc2 PE=1 SV=2	Smc2
KFVSTRSLI	9	H-2-Kd	SB	100.24	PD Sequest	TG	41000000	TG_1a	P56383	5_13	ATP synthase F(0) complex subunit C2, mitochondrial OS=Mus musculus OX=10090 GN=Atp5mc2 PE=1 SV=2	Atp5mc2
KFVSTRSLI	9	H-2-Kd	SB	100.24	Maxquant	HG	2826300	HG_2c	P56383	5_13	ATP synthase F(0) complex subunit C2, mitochondrial OS=Mus musculus OX=10090 GN=Atp5mc2 PE=1 SV=2	Atp5mc2
KFVSTRSLI	9	H-2-Kd	SB	100.24	PD Sequest	HG	5400000	HG_2b	P56383	5_13	ATP synthase F(0) complex subunit C2, mitochondrial OS=Mus musculus OX=10090 GN=Atp5mc2 PE=1 SV=2	Atp5mc2
KFVSTRSLI	9	H-2-Kd	SB	100.24	PD Mascot	TG	3600000	TG_2a	P56383	5_13	ATP synthase F(0) complex subunit C2, mitochondrial OS=Mus musculus OX=10090 GN=Atp5mc2 PE=1 SV=2	Atp5mc2
KFVSTRSLI	9	H-2-Kd	SB	100.24	PD Sequest	Control	15000000	Control_1_1a	P56383	5_13	ATP synthase F(0) complex subunit C2, mitochondrial OS=Mus musculus OX=10090 GN=Atp5mc2 PE=1 SV=2	Atp5mc2
KFVSTRSLI	9	H-2-Kd	SB	100.24	PD Sequest	TG	3600000	TG_2a	P56383	5_13	ATP synthase F(0) complex subunit C2, mitochondrial OS=Mus musculus OX=10090 GN=Atp5mc2 PE=1 SV=2	Atp5mc2
KFVSTRSLI	9	H-2-Kd	SB	100.24	PD Mascot	TG	38000000	TG_1b	P56383	5_13	ATP synthase F(0) complex subunit C2, mitochondrial OS=Mus musculus OX=10090 GN=Atp5mc2 PE=1 SV=2	Atp5mc2
KFVSTRSLI	9	H-2-Kd	SB	100.24	Maxquant	Control	8317600	Control_1_1b	P56383	5_13	ATP synthase F(0) complex subunit C2, mitochondrial OS=Mus musculus OX=10090 GN=Atp5mc2 PE=1 SV=2	Atp5mc2
KFVSTRSLI	9	H-2-Kd	SB	100.24	Maxquant	HG	2268800	HG_2a	P56383	5_13	ATP synthase F(0) complex subunit C2, mitochondrial OS=Mus musculus OX=10090 GN=Atp5mc2 PE=1 SV=2	Atp5mc2
KFVSTRSLI	9	H-2-Kd	SB	100.24	PD Sequest	HG	5400000	HG_2a	P56383	5_13	ATP synthase F(0) complex subunit C2, mitochondrial OS=Mus musculus OX=10090 GN=Atp5mc2 PE=1 SV=2	Atp5mc2
KFVSTRSLI	9	H-2-Kd	SB	100.24	PD Mascot	Control	17000000	Control_1_1b	P56383	5_13	ATP synthase F(0) complex subunit C2, mitochondrial OS=Mus musculus OX=10090 GN=Atp5mc2 PE=1 SV=2	Atp5mc2
KFVSTRSLI	9	H-2-Kd	SB	100.24	PD Sequest	TG	34000000	TG_1c	P56383	5_13	ATP synthase F(0) complex subunit C2, mitochondrial OS=Mus musculus OX=10090 GN=Atp5mc2 PE=1 SV=2	Atp5mc2
KFVSTRSLI	9	H-2-Kd	SB	100.24	PD Mascot	TG	3100000	TG_2b	P56383	5_13	ATP synthase F(0) complex subunit C2, mitochondrial OS=Mus musculus OX=10090 GN=Atp5mc2 PE=1 SV=2	Atp5mc2
KFVSTRSLI	9	H-2-Kd	SB	100.24	PD Mascot	TG	34000000	TG_1c	P56383	5_13	ATP synthase F(0) complex subunit C2, mitochondrial OS=Mus musculus OX=10090 GN=Atp5mc2 PE=1 SV=2	Atp5mc2
KFVSTRSLI	9	H-2-Kd	SB	100.24	Maxquant	TG	15802000	TG_1b	P56383	5_13	ATP synthase F(0) complex subunit C2, mitochondrial OS=Mus musculus OX=10090 GN=Atp5mc2 PE=1 SV=2	Atp5mc2
KFVSTRSLI	9	H-2-Kd	SB	100.24	PD Mascot	HG	4600000	HG_2c	P56383	5_13	ATP synthase F(0) complex subunit C2, mitochondrial OS=Mus musculus OX=10090 GN=Atp5mc2 PE=1 SV=2	Atp5mc2
KFVSTRSLI	9	H-2-Kd	SB	100.24	Maxquant	TG	17315000	TG_1c	P56383	5_13	ATP synthase F(0) complex subunit C2, mitochondrial OS=Mus musculus OX=10090 GN=Atp5mc2 PE=1 SV=2	Atp5mc2
KFVSTRSLI	9	H-2-Kd	SB	100.24	PD Sequest	Control	17000000	Control_1_1b	P56383	5_13	ATP synthase F(0) complex subunit C2, mitochondrial OS=Mus musculus OX=10090 GN=Atp5mc2 PE=1 SV=2	Atp5mc2
KFVSTRSLI	9	H-2-Kd	SB	100.24	PD Mascot	Control	20000000	Control_1_1c	P56383	5_13	ATP synthase F(0) complex subunit C2, mitochondrial OS=Mus musculus OX=10090 GN=Atp5mc2 PE=1 SV=2	Atp5mc2
KFVSTRSLI	9	H-2-Kd	SB	100.24	PD Sequest	HG	4600000	HG_2c	P56383	5_13	ATP synthase F(0) complex subunit C2, mitochondrial OS=Mus musculus OX=10090 GN=Atp5mc2 PE=1 SV=2	Atp5mc2
KFVSTRSLI	9	H-2-Kd	SB	100.24	PD Sequest	TG	3000000	TG_2c	P56383	5_13	ATP synthase F(0) complex subunit C2, mitochondrial OS=Mus musculus OX=10090 GN=Atp5mc2 PE=1 SV=2	Atp5mc2
KFVSTRSLI	9	H-2-Kd	SB	100.24	Maxquant	Control	11624000	Control_1_1c	P56383	5_13	ATP synthase F(0) complex subunit C2, mitochondrial OS=Mus musculus OX=10090 GN=Atp5mc2 PE=1 SV=2	Atp5mc2
KFVSTRSLI	9	H-2-Kd	SB	100.24	PD Sequest	Control	20000000	Control_1_1c	P56383	5_13	ATP synthase F(0) complex subunit C2, mitochondrial OS=Mus musculus OX=10090 GN=Atp5mc2 PE=1 SV=2	Atp5mc2
KFVSTRSLI	9	H-2-Kd	SB	100.24	PD Sequest	TG	38000000	TG_1b	P56383	5_13	ATP synthase F(0) complex subunit C2, mitochondrial OS=Mus musculus OX=10090 GN=Atp5mc2 PE=1 SV=2	Atp5mc2
KFVSTRSLI	9	H-2-Kd	SB	100.24	Maxquant	Control	8050900	Control_1_1a	P56383	5_13	ATP synthase F(0) complex subunit C2, mitochondrial OS=Mus musculus OX=10090 GN=Atp5mc2 PE=1 SV=2	Atp5mc2
KFVSTRSLI	9	H-2-Kd	SB	100.24	PD Mascot	Control	15000000	Control_1_1a	P56383	5_13	ATP synthase F(0) complex subunit C2, mitochondrial OS=Mus musculus OX=10090 GN=Atp5mc2 PE=1 SV=2	Atp5mc2
KFVSTRSLI	9	H-2-Kd	SB	100.24	PD Mascot	TG	41000000	TG_1a	P56383	5_13	ATP synthase F(0) complex subunit C2, mitochondrial OS=Mus musculus OX=10090 GN=Atp5mc2 PE=1 SV=2	Atp5mc2
KFVSTRSLI	9	H-2-Kd	SB	100.24	Maxquant	HG	942770	HG_1c	P56383	5_13	ATP synthase F(0) complex subunit C2, mitochondrial OS=Mus musculus OX=10090 GN=Atp5mc2 PE=1 SV=2	Atp5mc2
KFVSTRSLI	9	H-2-Kd	SB	100.24	PD Mascot	HG	5400000	HG_2b	P56383	5_13	ATP synthase F(0) complex subunit C2, mitochondrial OS=Mus musculus OX=10090 GN=Atp5mc2 PE=1 SV=2	Atp5mc2
KFVSTRSLI	9	H-2-Kd	SB	100.24	PD Mascot	HG	5400000	HG_2a	P56383	5_13	ATP synthase F(0) complex subunit C2, mitochondrial OS=Mus musculus OX=10090 GN=Atp5mc2 PE=1 SV=2	Atp5mc2
KFVSTRSLI	9	H-2-Kd	SB	100.24	PD Sequest	TG	3100000	TG_2b	P56383	5_13	ATP synthase F(0) complex subunit C2, mitochondrial OS=Mus musculus OX=10090 GN=Atp5mc2 PE=1 SV=2	Atp5mc2
KFVSTRSLI	9	H-2-Kd	SB	100.24	PD Mascot	TG	3000000	TG_2c	P56383	5_13	ATP synthase F(0) complex subunit C2, mitochondrial OS=Mus musculus OX=10090 GN=Atp5mc2 PE=1 SV=2	Atp5mc2
KGITRENLQAV	11	H-2-Db	WB	2953.17	PD Mascot	TG	1200000	TG_1a	Q91WG0	362_372	Acylcarnitine hydrolase OS=Mus musculus OX=10090 GN=Ces2c PE=1 SV=1	Ces2c
KHHLWMTYESV	11	H-2-Kd	WB	2880.27	PD Mascot	HG	5900000	HG_2c	O08650	374_384	Hyaluronan synthase 3 OS=Mus musculus OX=10090 GN=Has3 PE=1 SV=2	Has3
KMVLVNAVYFK	11	H-2-Db	WB	2670.53	PD Mascot	HG	500000	HG_2c	P12388	194_204	Plasminogen activator inhibitor 2, macrophage OS=Mus musculus OX=10090 GN=Serpinb2 PE=1 SV=1	Serpinb2
KNYNGILSII	10	H-2-Kd	WB	692.39	PD Sequest	TG	18000000	TG_1c	Q9R155	244_253	Pendrin OS=Mus musculus OX=10090 GN=Slc26a4 PE=1 SV=1	Slc26a4
KQHQLDMEAL	10	H-2-Db	WB	3738.5	PD Mascot	TG	4100000	TG_2a	Q99KW3	1838_1847	TRIO and F-actin-binding protein OS=Mus musculus OX=10090 GN=Triobp PE=1 SV=3	Triobp
KQHQLDMEAL	10	H-2-Db	WB	3738.5	PD Mascot	TG	3300000	TG_2c	Q99KW3	1838_1847	TRIO and F-actin-binding protein OS=Mus musculus OX=10090 GN=Triobp PE=1 SV=3	Triobp
KQHQLDMEAL	10	H-2-Db	WB	3738.5	PD Mascot	TG	2300000	TG_2b	Q99KW3	1838_1847	TRIO and F-actin-binding protein OS=Mus musculus OX=10090 GN=Triobp PE=1 SV=3	Triobp
KYDPINSML	9	H-2-Kd	SB	64.25	Maxquant	TG	17919000	TG_1c	Q91VC9	312_320	Growth hormone-inducible transmembrane protein OS=Mus musculus OX=10090 GN=Ghitm PE=1 SV=1	Ghitm
KYDPINSML	9	H-2-Kd	SB	64.25	Maxquant	TG	19546000	TG_1b	Q91VC9	312_320	Growth hormone-inducible transmembrane protein OS=Mus musculus OX=10090 GN=Ghitm PE=1 SV=1	Ghitm
KYDPINSML	9	H-2-Kd	SB	64.25	PD Mascot	TG	17000000	TG_1c	Q91VC9	312_320	Growth hormone-inducible transmembrane protein OS=Mus musculus OX=10090 GN=Ghitm PE=1 SV=1	Ghitm
KYDPINSML	9	H-2-Kd	SB	64.25	Maxquant	HG	7958400	HG_2a	Q91VC9	312_320	Growth hormone-inducible transmembrane protein OS=Mus musculus OX=10090 GN=Ghitm PE=1 SV=1	Ghitm
KYDPINSML	9	H-2-Kd	SB	64.25	Maxquant	TG	5676100	TG_2a	Q91VC9	312_320	Growth hormone-inducible transmembrane protein OS=Mus musculus OX=10090 GN=Ghitm PE=1 SV=1	Ghitm
KYDPINSML	9	H-2-Kd	SB	64.25	Maxquant	Control	4866900	Control_1_1c	Q91VC9	312_320	Growth hormone-inducible transmembrane protein OS=Mus musculus OX=10090 GN=Ghitm PE=1 SV=1	Ghitm
KYDPINSML	9	H-2-Kd	SB	64.25	Maxquant	HG	6554900	HG_2c	Q91VC9	312_320	Growth hormone-inducible transmembrane protein OS=Mus musculus OX=10090 GN=Ghitm PE=1 SV=1	Ghitm
KYDPINSML	9	H-2-Kd	SB	64.25	Maxquant	HG	4699200	HG_2b	Q91VC9	312_320	Growth hormone-inducible transmembrane protein OS=Mus musculus OX=10090 GN=Ghitm PE=1 SV=1	Ghitm
KYDPINSML	9	H-2-Kd	SB	64.25	PD Mascot	TG	8700000	TG_2c	Q91VC9	312_320	Growth hormone-inducible transmembrane protein OS=Mus musculus OX=10090 GN=Ghitm PE=1 SV=1	Ghitm
KYDPINSML	9	H-2-Kd	SB	64.25	PD Mascot	HG	12000000	HG_2b	Q91VC9	312_320	Growth hormone-inducible transmembrane protein OS=Mus musculus OX=10090 GN=Ghitm PE=1 SV=1	Ghitm
KYDPINSML	9	H-2-Kd	SB	64.25	Maxquant	TG	17127000	TG_1a	Q91VC9	312_320	Growth hormone-inducible transmembrane protein OS=Mus musculus OX=10090 GN=Ghitm PE=1 SV=1	Ghitm
KYDPINSML	9	H-2-Kd	SB	64.25	PD Mascot	TG	12000000	TG_2a	Q91VC9	312_320	Growth hormone-inducible transmembrane protein OS=Mus musculus OX=10090 GN=Ghitm PE=1 SV=1	Ghitm
KYDPINSML	9	H-2-Kd	SB	64.25	Maxquant	TG	5748500	TG_2b	Q91VC9	312_320	Growth hormone-inducible transmembrane protein OS=Mus musculus OX=10090 GN=Ghitm PE=1 SV=1	Ghitm
KYDPINSML	9	H-2-Kd	SB	64.25	Maxquant	Control	572280	Control_1_2c	Q91VC9	312_320	Growth hormone-inducible transmembrane protein OS=Mus musculus OX=10090 GN=Ghitm PE=1 SV=1	Ghitm
KYDPINSML	9	H-2-Kd	SB	64.25	Maxquant	TG	4037500	TG_2c	Q91VC9	312_320	Growth hormone-inducible transmembrane protein OS=Mus musculus OX=10090 GN=Ghitm PE=1 SV=1	Ghitm
KYEAAGTLV	9	H-2-Kd	SB	29.25	PD Mascot	Control	8500000	Control_1_1b	Q9JIF7	260_268	Coatomer subunit beta OS=Mus musculus OX=10090 GN=Copb1 PE=1 SV=1	Copb1
KYEEVLHNL	9	H-2-Kd	SB	64.16	PD Mascot	TG	4200000	TG_1a	Q05A80	84_92	Caprin-2 OS=Mus musculus OX=10090 GN=Caprin2 PE=1 SV=1	Caprin2
KYEEVLHNL	9	H-2-Kd	SB	64.16	PD Sequest	TG	5900000	TG_1c	Q05A80	84_92	Caprin-2 OS=Mus musculus OX=10090 GN=Caprin2 PE=1 SV=1	Caprin2
KYEEVLHNL	9	H-2-Kd	SB	64.16	PD Sequest	TG	4200000	TG_1a	Q05A80	84_92	Caprin-2 OS=Mus musculus OX=10090 GN=Caprin2 PE=1 SV=1	Caprin2
KYEEVLHNL	9	H-2-Kd	SB	64.16	PD Mascot	TG	5900000	TG_1c	Q05A80	84_92	Caprin-2 OS=Mus musculus OX=10090 GN=Caprin2 PE=1 SV=1	Caprin2
KYEVNTRTWTI	11	H-2-Kd	SB	109.84	PD Mascot	TG	2400000	TG_1c	Q6A051	501_511	Attractin-like protein 1 OS=Mus musculus OX=10090 GN=Atrnl1 PE=1 SV=2	Atrnl1
KYEVNTRTWTI	11	H-2-Kd	SB	109.84	PD Sequest	Control	16000000	Control_1_1a	Q6A051	501_511	Attractin-like protein 1 OS=Mus musculus OX=10090 GN=Atrnl1 PE=1 SV=2	Atrnl1
KYEVNTRTWTI	11	H-2-Kd	SB	109.84	PD Sequest	TG	2600000	TG_1a	Q6A051	501_511	Attractin-like protein 1 OS=Mus musculus OX=10090 GN=Atrnl1 PE=1 SV=2	Atrnl1
KYEVNTRTWTI	11	H-2-Kd	SB	109.84	PD Mascot	TG	2800000	TG_1b	Q6A051	501_511	Attractin-like protein 1 OS=Mus musculus OX=10090 GN=Atrnl1 PE=1 SV=2	Atrnl1
KYEVNTRTWTI	11	H-2-Kd	SB	109.84	PD Sequest	HG	1700000	HG_1a	Q6A051	501_511	Attractin-like protein 1 OS=Mus musculus OX=10090 GN=Atrnl1 PE=1 SV=2	Atrnl1
KYEVNTRTWTI	11	H-2-Kd	SB	109.84	PD Sequest	TG	2400000	TG_1c	Q6A051	501_511	Attractin-like protein 1 OS=Mus musculus OX=10090 GN=Atrnl1 PE=1 SV=2	Atrnl1
KYEVNTRTWTI	11	H-2-Kd	SB	109.84	PD Mascot	TG	2600000	TG_1a	Q6A051	501_511	Attractin-like protein 1 OS=Mus musculus OX=10090 GN=Atrnl1 PE=1 SV=2	Atrnl1
KYEVNTRTWTI	11	H-2-Kd	SB	109.84	PD Sequest	HG	8000000	HG_1c	Q6A051	501_511	Attractin-like protein 1 OS=Mus musculus OX=10090 GN=Atrnl1 PE=1 SV=2	Atrnl1
KYEVNTRTWTI	11	H-2-Kd	SB	109.84	PD Sequest	Control	16000000	Control_1_1c	Q6A051	501_511	Attractin-like protein 1 OS=Mus musculus OX=10090 GN=Atrnl1 PE=1 SV=2	Atrnl1
KYEVNTRTWTI	11	H-2-Kd	SB	109.84	PD Sequest	Control	2000000	Control_1_1b	Q6A051	501_511	Attractin-like protein 1 OS=Mus musculus OX=10090 GN=Atrnl1 PE=1 SV=2	Atrnl1
KYEVNTRTWTI	11	H-2-Kd	SB	109.84	PD Sequest	HG	1500000	HG_1b	Q6A051	501_511	Attractin-like protein 1 OS=Mus musculus OX=10090 GN=Atrnl1 PE=1 SV=2	Atrnl1
KYEVNTRTWTI	11	H-2-Kd	SB	109.84	PD Mascot	Control	16000000	Control_1_1a	Q6A051	501_511	Attractin-like protein 1 OS=Mus musculus OX=10090 GN=Atrnl1 PE=1 SV=2	Atrnl1
KYEVNTRTWTI	11	H-2-Kd	SB	109.84	PD Mascot	Control	16000000	Control_1_1c	Q6A051	501_511	Attractin-like protein 1 OS=Mus musculus OX=10090 GN=Atrnl1 PE=1 SV=2	Atrnl1
KYEVNTRTWTI	11	H-2-Kd	SB	109.84	PD Mascot	HG	8000000	HG_1c	Q6A051	501_511	Attractin-like protein 1 OS=Mus musculus OX=10090 GN=Atrnl1 PE=1 SV=2	Atrnl1
KYEVNTRTWTI	11	H-2-Kd	SB	109.84	PD Sequest	TG	2800000	TG_1b	Q6A051	501_511	Attractin-like protein 1 OS=Mus musculus OX=10090 GN=Atrnl1 PE=1 SV=2	Atrnl1
KYFENWSASMI	11	H-2-Kd	SB	35.43	PD Mascot	TG	2400000	TG_1c	P00405	216_226	Cytochrome c oxidase subunit 2 OS=Mus musculus OX=10090 GN=Mtco2 PE=1 SV=1	Mtco2
KYFENWSASMI	11	H-2-Kd	SB	35.43	PD Mascot	TG	2000000	TG_1a	P00405	216_226	Cytochrome c oxidase subunit 2 OS=Mus musculus OX=10090 GN=Mtco2 PE=1 SV=1	Mtco2
KYFEVPSVL	9	H-2-Kd	SB	27.72	Maxquant	TG	5255800	TG_1b	Q9QZB7	110_118	Actin-related protein 10 OS=Mus musculus OX=10090 GN=Actr10 PE=1 SV=2	Actr10
KYFEVPSVL	9	H-2-Kd	SB	27.72	Maxquant	TG	702120	TG_2c	Q9QZB7	110_118	Actin-related protein 10 OS=Mus musculus OX=10090 GN=Actr10 PE=1 SV=2	Actr10
KYFEVPSVL	9	H-2-Kd	SB	27.72	Maxquant	TG	3938400	TG_1c	Q9QZB7	110_118	Actin-related protein 10 OS=Mus musculus OX=10090 GN=Actr10 PE=1 SV=2	Actr10
KYFEVPSVL	9	H-2-Kd	SB	27.72	Maxquant	TG	1072100	TG_2b	Q9QZB7	110_118	Actin-related protein 10 OS=Mus musculus OX=10090 GN=Actr10 PE=1 SV=2	Actr10
KYFEVPSVL	9	H-2-Kd	SB	27.72	Maxquant	TG	748110	TG_2a	Q9QZB7	110_118	Actin-related protein 10 OS=Mus musculus OX=10090 GN=Actr10 PE=1 SV=2	Actr10
KYFEVPSVL	9	H-2-Kd	SB	27.72	Maxquant	TG	3986900	TG_1a	Q9QZB7	110_118	Actin-related protein 10 OS=Mus musculus OX=10090 GN=Actr10 PE=1 SV=2	Actr10
KYFIQREI	8	H-2-Kd	SB	376.56	PD Sequest	HG	8900000	HG_2b	Q9D967	87_94	Magnesium-dependent phosphatase 1 OS=Mus musculus OX=10090 GN=Mdp1 PE=1 SV=1	Mdp1
KYFIQREI	8	H-2-Kd	SB	376.56	PD Sequest	HG	8600000	HG_2a	Q9D967	87_94	Magnesium-dependent phosphatase 1 OS=Mus musculus OX=10090 GN=Mdp1 PE=1 SV=1	Mdp1
KYFIQREI	8	H-2-Kd	SB	376.56	PD Mascot	Control	10000000	Control_1_1b	Q9D967	87_94	Magnesium-dependent phosphatase 1 OS=Mus musculus OX=10090 GN=Mdp1 PE=1 SV=1	Mdp1
KYFIQREI	8	H-2-Kd	SB	376.56	PD Mascot	TG	15000000	TG_2b	Q9D967	87_94	Magnesium-dependent phosphatase 1 OS=Mus musculus OX=10090 GN=Mdp1 PE=1 SV=1	Mdp1
KYFIQREI	8	H-2-Kd	SB	376.56	PD Mascot	TG	180000000	TG_1c	Q9D967	87_94	Magnesium-dependent phosphatase 1 OS=Mus musculus OX=10090 GN=Mdp1 PE=1 SV=1	Mdp1
KYFIQREI	8	H-2-Kd	SB	376.56	PD Mascot	TG	17000000	TG_2c	Q9D967	87_94	Magnesium-dependent phosphatase 1 OS=Mus musculus OX=10090 GN=Mdp1 PE=1 SV=1	Mdp1
KYFIQREI	8	H-2-Kd	SB	376.56	PD Sequest	TG	15000000	TG_2a	Q9D967	87_94	Magnesium-dependent phosphatase 1 OS=Mus musculus OX=10090 GN=Mdp1 PE=1 SV=1	Mdp1
KYFIQREI	8	H-2-Kd	SB	376.56	PD Sequest	Control	9200000	Control_1_1a	Q9D967	87_94	Magnesium-dependent phosphatase 1 OS=Mus musculus OX=10090 GN=Mdp1 PE=1 SV=1	Mdp1
KYFIQREI	8	H-2-Kd	SB	376.56	PD Mascot	TG	190000000	TG_1b	Q9D967	87_94	Magnesium-dependent phosphatase 1 OS=Mus musculus OX=10090 GN=Mdp1 PE=1 SV=1	Mdp1
KYFIQREI	8	H-2-Kd	SB	376.56	PD Sequest	TG	15000000	TG_2b	Q9D967	87_94	Magnesium-dependent phosphatase 1 OS=Mus musculus OX=10090 GN=Mdp1 PE=1 SV=1	Mdp1
KYFIQREI	8	H-2-Kd	SB	376.56	PD Mascot	HG	8900000	HG_2b	Q9D967	87_94	Magnesium-dependent phosphatase 1 OS=Mus musculus OX=10090 GN=Mdp1 PE=1 SV=1	Mdp1
KYFIQREI	8	H-2-Kd	SB	376.56	PD Mascot	Control	9200000	Control_1_1a	Q9D967	87_94	Magnesium-dependent phosphatase 1 OS=Mus musculus OX=10090 GN=Mdp1 PE=1 SV=1	Mdp1
KYFIQREI	8	H-2-Kd	SB	376.56	PD Sequest	TG	180000000	TG_1c	Q9D967	87_94	Magnesium-dependent phosphatase 1 OS=Mus musculus OX=10090 GN=Mdp1 PE=1 SV=1	Mdp1
KYFIQREI	8	H-2-Kd	SB	376.56	PD Sequest	Control	8000000	Control_1_1c	Q9D967	87_94	Magnesium-dependent phosphatase 1 OS=Mus musculus OX=10090 GN=Mdp1 PE=1 SV=1	Mdp1
KYFIQREI	8	H-2-Kd	SB	376.56	PD Sequest	TG	170000000	TG_1a	Q9D967	87_94	Magnesium-dependent phosphatase 1 OS=Mus musculus OX=10090 GN=Mdp1 PE=1 SV=1	Mdp1
KYFIQREI	8	H-2-Kd	SB	376.56	PD Sequest	Control	10000000	Control_1_1b	Q9D967	87_94	Magnesium-dependent phosphatase 1 OS=Mus musculus OX=10090 GN=Mdp1 PE=1 SV=1	Mdp1
KYFIQREI	8	H-2-Kd	SB	376.56	PD Sequest	HG	10000000	HG_2c	Q9D967	87_94	Magnesium-dependent phosphatase 1 OS=Mus musculus OX=10090 GN=Mdp1 PE=1 SV=1	Mdp1
KYFIQREI	8	H-2-Kd	SB	376.56	PD Mascot	HG	8600000	HG_2a	Q9D967	87_94	Magnesium-dependent phosphatase 1 OS=Mus musculus OX=10090 GN=Mdp1 PE=1 SV=1	Mdp1
KYFIQREI	8	H-2-Kd	SB	376.56	PD Mascot	HG	10000000	HG_2c	Q9D967	87_94	Magnesium-dependent phosphatase 1 OS=Mus musculus OX=10090 GN=Mdp1 PE=1 SV=1	Mdp1
KYFPSRVSI	9	H-2-Kd	SB	12.47	PD Sequest	HG	8900000	HG_2b	Q6PEB6	139_147	MOB-like protein phocein OS=Mus musculus OX=10090 GN=Mob4 PE=1 SV=1	Mob4
KYFPSRVSI	9	H-2-Kd	SB	12.47	PD Sequest	Control	10000000	Control_1_1b	Q6PEB6	139_147	MOB-like protein phocein OS=Mus musculus OX=10090 GN=Mob4 PE=1 SV=1	Mob4
KYFPSRVSI	9	H-2-Kd	SB	12.47	PD Sequest	HG	8600000	HG_2a	Q6PEB6	139_147	MOB-like protein phocein OS=Mus musculus OX=10090 GN=Mob4 PE=1 SV=1	Mob4
KYFPSRVSI	9	H-2-Kd	SB	12.47	PD Sequest	Control	9200000	Control_1_1a	Q6PEB6	139_147	MOB-like protein phocein OS=Mus musculus OX=10090 GN=Mob4 PE=1 SV=1	Mob4
KYFPSRVSI	9	H-2-Kd	SB	12.47	PD Mascot	TG	17000000	TG_2c	Q6PEB6	139_147	MOB-like protein phocein OS=Mus musculus OX=10090 GN=Mob4 PE=1 SV=1	Mob4
KYFPSRVSI	9	H-2-Kd	SB	12.47	PD Mascot	Control	10000000	Control_1_1b	Q6PEB6	139_147	MOB-like protein phocein OS=Mus musculus OX=10090 GN=Mob4 PE=1 SV=1	Mob4
KYFPSRVSI	9	H-2-Kd	SB	12.47	PD Sequest	TG	15000000	TG_2b	Q6PEB6	139_147	MOB-like protein phocein OS=Mus musculus OX=10090 GN=Mob4 PE=1 SV=1	Mob4
KYFPSRVSI	9	H-2-Kd	SB	12.47	PD Sequest	HG	10000000	HG_2c	Q6PEB6	139_147	MOB-like protein phocein OS=Mus musculus OX=10090 GN=Mob4 PE=1 SV=1	Mob4
KYFPSRVSI	9	H-2-Kd	SB	12.47	PD Mascot	TG	15000000	TG_2b	Q6PEB6	139_147	MOB-like protein phocein OS=Mus musculus OX=10090 GN=Mob4 PE=1 SV=1	Mob4
KYFPSRVSI	9	H-2-Kd	SB	12.47	PD Sequest	TG	15000000	TG_2a	Q6PEB6	139_147	MOB-like protein phocein OS=Mus musculus OX=10090 GN=Mob4 PE=1 SV=1	Mob4
KYFPSRVSI	9	H-2-Kd	SB	12.47	PD Sequest	Control	8000000	Control_1_1c	Q6PEB6	139_147	MOB-like protein phocein OS=Mus musculus OX=10090 GN=Mob4 PE=1 SV=1	Mob4
KYFPSRVSI	9	H-2-Kd	SB	12.47	PD Sequest	TG	170000000	TG_1a	Q6PEB6	139_147	MOB-like protein phocein OS=Mus musculus OX=10090 GN=Mob4 PE=1 SV=1	Mob4
KYFPSRVSI	9	H-2-Kd	SB	12.47	PD Sequest	TG	17000000	TG_2c	Q6PEB6	139_147	MOB-like protein phocein OS=Mus musculus OX=10090 GN=Mob4 PE=1 SV=1	Mob4
KYFPSRVSI	9	H-2-Kd	SB	12.47	PD Mascot	HG	8900000	HG_2b	Q6PEB6	139_147	MOB-like protein phocein OS=Mus musculus OX=10090 GN=Mob4 PE=1 SV=1	Mob4
KYFPSRVSI	9	H-2-Kd	SB	12.47	PD Mascot	Control	9200000	Control_1_1a	Q6PEB6	139_147	MOB-like protein phocein OS=Mus musculus OX=10090 GN=Mob4 PE=1 SV=1	Mob4
KYFPSRVSI	9	H-2-Kd	SB	12.47	PD Mascot	HG	8600000	HG_2a	Q6PEB6	139_147	MOB-like protein phocein OS=Mus musculus OX=10090 GN=Mob4 PE=1 SV=1	Mob4
KYFPSRVSI	9	H-2-Kd	SB	12.47	PD Mascot	TG	170000000	TG_1a	Q6PEB6	139_147	MOB-like protein phocein OS=Mus musculus OX=10090 GN=Mob4 PE=1 SV=1	Mob4
KYFPSRVSI	9	H-2-Kd	SB	12.47	PD Sequest	TG	190000000	TG_1b	Q6PEB6	139_147	MOB-like protein phocein OS=Mus musculus OX=10090 GN=Mob4 PE=1 SV=1	Mob4
KYFPSRVSI	9	H-2-Kd	SB	12.47	PD Mascot	HG	10000000	HG_2c	Q6PEB6	139_147	MOB-like protein phocein OS=Mus musculus OX=10090 GN=Mob4 PE=1 SV=1	Mob4
KYFPSRVSI	9	H-2-Kd	SB	12.47	PD Mascot	TG	190000000	TG_1b	Q6PEB6	139_147	MOB-like protein phocein OS=Mus musculus OX=10090 GN=Mob4 PE=1 SV=1	Mob4
KYGKLGQGV	9	H-2-Kd	SB	444.44	PD Mascot	Control	2500000	Control_1_1b	Q8VBV3	161_169	Exosome complex component RRP4 OS=Mus musculus OX=10090 GN=Exosc2 PE=1 SV=1	Exosc2
KYGKLGQGV	9	H-2-Kd	SB	444.44	PD Mascot	HG	2500000	HG_1b	Q8VBV3	161_169	Exosome complex component RRP4 OS=Mus musculus OX=10090 GN=Exosc2 PE=1 SV=1	Exosc2
KYHFVTPLTSM	11	H-2-Kd	SB	90.1	PD Mascot	Control	13000000	Control_1_1c	Q61704	590_600	Inter-alpha-trypsin inhibitor heavy chain H3 OS=Mus musculus OX=10090 GN=Itih3 PE=1 SV=3	Itih3
KYHFVTPLTSM	11	H-2-Kd	SB	90.1	PD Mascot	Control	15000000	Control_1_1a	Q61704	590_600	Inter-alpha-trypsin inhibitor heavy chain H3 OS=Mus musculus OX=10090 GN=Itih3 PE=1 SV=3	Itih3
KYHFVTPLTSM	11	H-2-Kd	SB	90.1	PD Mascot	Control	12000000	Control_1_1b	Q61704	590_600	Inter-alpha-trypsin inhibitor heavy chain H3 OS=Mus musculus OX=10090 GN=Itih3 PE=1 SV=3	Itih3
KYIDQKFVL	9	H-2-Kd	SB	226.71	PD Mascot	TG	14000000	TG_1a	Q61151	173_181	Serine/threonine-protein phosphatase 2A 56 kDa regulatory subunit epsilon isoform OS=Mus musculus OX=10090 GN=Ppp2r5e PE=1 SV=3	Ppp2r5e
KYIDQKFVL	9	H-2-Kd	SB	226.71	Maxquant	TG	7478200	TG_1b	Q61151	173_181	Serine/threonine-protein phosphatase 2A 56 kDa regulatory subunit epsilon isoform OS=Mus musculus OX=10090 GN=Ppp2r5e PE=1 SV=3	Ppp2r5e
KYIDQKFVL	9	H-2-Kd	SB	226.71	Maxquant	TG	6383700	TG_1a	Q61151	173_181	Serine/threonine-protein phosphatase 2A 56 kDa regulatory subunit epsilon isoform OS=Mus musculus OX=10090 GN=Ppp2r5e PE=1 SV=3	Ppp2r5e
KYIDQKFVL	9	H-2-Kd	SB	226.71	PD Mascot	TG	17000000	TG_1b	Q61151	173_181	Serine/threonine-protein phosphatase 2A 56 kDa regulatory subunit epsilon isoform OS=Mus musculus OX=10090 GN=Ppp2r5e PE=1 SV=3	Ppp2r5e
KYIDQKFVL	9	H-2-Kd	SB	226.71	Maxquant	TG	6628000	TG_1c	Q61151	173_181	Serine/threonine-protein phosphatase 2A 56 kDa regulatory subunit epsilon isoform OS=Mus musculus OX=10090 GN=Ppp2r5e PE=1 SV=3	Ppp2r5e
KYIEGVSDF	9	H-2-Kd	SB	585.72	PD Sequest	Control	17000000	Control_1_1a	P28575	237_245	Actin-binding protein IPP OS=Mus musculus OX=10090 GN=Ipp PE=2 SV=3	Ipp
KYIEGVSDF	9	H-2-Kd	SB	585.72	PD Sequest	HG	33000000	HG_2a	P28575	237_245	Actin-binding protein IPP OS=Mus musculus OX=10090 GN=Ipp PE=2 SV=3	Ipp
KYIEGVSDF	9	H-2-Kd	SB	585.72	Maxquant	TG	4205700	TG_2b	P28575	237_245	Actin-binding protein IPP OS=Mus musculus OX=10090 GN=Ipp PE=2 SV=3	Ipp
KYIEGVSDF	9	H-2-Kd	SB	585.72	PD Mascot	HG	24000000	HG_2b	P28575	237_245	Actin-binding protein IPP OS=Mus musculus OX=10090 GN=Ipp PE=2 SV=3	Ipp
KYIEGVSDF	9	H-2-Kd	SB	585.72	Maxquant	TG	3642600	TG_2a	P28575	237_245	Actin-binding protein IPP OS=Mus musculus OX=10090 GN=Ipp PE=2 SV=3	Ipp
KYIEGVSDF	9	H-2-Kd	SB	585.72	PD Sequest	TG	4300000	TG_2c	P28575	237_245	Actin-binding protein IPP OS=Mus musculus OX=10090 GN=Ipp PE=2 SV=3	Ipp
KYIEGVSDF	9	H-2-Kd	SB	585.72	Maxquant	TG	13957000	TG_1b	P28575	237_245	Actin-binding protein IPP OS=Mus musculus OX=10090 GN=Ipp PE=2 SV=3	Ipp
KYIEGVSDF	9	H-2-Kd	SB	585.72	Maxquant	HG	10687000	HG_2c	P28575	237_245	Actin-binding protein IPP OS=Mus musculus OX=10090 GN=Ipp PE=2 SV=3	Ipp
KYIEGVSDF	9	H-2-Kd	SB	585.72	PD Sequest	Control	18000000	Control_1_1b	P28575	237_245	Actin-binding protein IPP OS=Mus musculus OX=10090 GN=Ipp PE=2 SV=3	Ipp
KYIEGVSDF	9	H-2-Kd	SB	585.72	Maxquant	Control	638650	Control_1_2c	P28575	237_245	Actin-binding protein IPP OS=Mus musculus OX=10090 GN=Ipp PE=2 SV=3	Ipp
KYIEGVSDF	9	H-2-Kd	SB	585.72	PD Sequest	HG	27000000	HG_2c	P28575	237_245	Actin-binding protein IPP OS=Mus musculus OX=10090 GN=Ipp PE=2 SV=3	Ipp
KYIEGVSDF	9	H-2-Kd	SB	585.72	PD Sequest	Control	17000000	Control_1_1c	P28575	237_245	Actin-binding protein IPP OS=Mus musculus OX=10090 GN=Ipp PE=2 SV=3	Ipp
KYIEGVSDF	9	H-2-Kd	SB	585.72	PD Mascot	TG	5000000	TG_2a	P28575	237_245	Actin-binding protein IPP OS=Mus musculus OX=10090 GN=Ipp PE=2 SV=3	Ipp
KYIEGVSDF	9	H-2-Kd	SB	585.72	PD Mascot	Control	17000000	Control_1_1c	P28575	237_245	Actin-binding protein IPP OS=Mus musculus OX=10090 GN=Ipp PE=2 SV=3	Ipp
KYIEGVSDF	9	H-2-Kd	SB	585.72	PD Mascot	HG	27000000	HG_2c	P28575	237_245	Actin-binding protein IPP OS=Mus musculus OX=10090 GN=Ipp PE=2 SV=3	Ipp
KYIEGVSDF	9	H-2-Kd	SB	585.72	Maxquant	HG	14387000	HG_2b	P28575	237_245	Actin-binding protein IPP OS=Mus musculus OX=10090 GN=Ipp PE=2 SV=3	Ipp
KYIEGVSDF	9	H-2-Kd	SB	585.72	Maxquant	TG	13279000	TG_1a	P28575	237_245	Actin-binding protein IPP OS=Mus musculus OX=10090 GN=Ipp PE=2 SV=3	Ipp
KYIEGVSDF	9	H-2-Kd	SB	585.72	Maxquant	TG	11454000	TG_1c	P28575	237_245	Actin-binding protein IPP OS=Mus musculus OX=10090 GN=Ipp PE=2 SV=3	Ipp
KYIEGVSDF	9	H-2-Kd	SB	585.72	Maxquant	Control	7161500	Control_1_1a	P28575	237_245	Actin-binding protein IPP OS=Mus musculus OX=10090 GN=Ipp PE=2 SV=3	Ipp
KYIEGVSDF	9	H-2-Kd	SB	585.72	PD Sequest	TG	31000000	TG_1a	P28575	237_245	Actin-binding protein IPP OS=Mus musculus OX=10090 GN=Ipp PE=2 SV=3	Ipp
KYIEGVSDF	9	H-2-Kd	SB	585.72	Maxquant	Control	6832500	Control_1_1c	P28575	237_245	Actin-binding protein IPP OS=Mus musculus OX=10090 GN=Ipp PE=2 SV=3	Ipp
KYIEGVSDF	9	H-2-Kd	SB	585.72	Maxquant	TG	2637300	TG_2c	P28575	237_245	Actin-binding protein IPP OS=Mus musculus OX=10090 GN=Ipp PE=2 SV=3	Ipp
KYIEGVSDF	9	H-2-Kd	SB	585.72	PD Mascot	Control	18000000	Control_1_1b	P28575	237_245	Actin-binding protein IPP OS=Mus musculus OX=10090 GN=Ipp PE=2 SV=3	Ipp
KYIEGVSDF	9	H-2-Kd	SB	585.72	PD Sequest	TG	5000000	TG_2a	P28575	237_245	Actin-binding protein IPP OS=Mus musculus OX=10090 GN=Ipp PE=2 SV=3	Ipp
KYIEGVSDF	9	H-2-Kd	SB	585.72	Maxquant	HG	14263000	HG_2a	P28575	237_245	Actin-binding protein IPP OS=Mus musculus OX=10090 GN=Ipp PE=2 SV=3	Ipp
KYIEGVSDF	9	H-2-Kd	SB	585.72	PD Mascot	TG	31000000	TG_1a	P28575	237_245	Actin-binding protein IPP OS=Mus musculus OX=10090 GN=Ipp PE=2 SV=3	Ipp
KYIEGVSDF	9	H-2-Kd	SB	585.72	PD Sequest	HG	24000000	HG_2b	P28575	237_245	Actin-binding protein IPP OS=Mus musculus OX=10090 GN=Ipp PE=2 SV=3	Ipp
KYIEGVSDF	9	H-2-Kd	SB	585.72	PD Mascot	HG	33000000	HG_2a	P28575	237_245	Actin-binding protein IPP OS=Mus musculus OX=10090 GN=Ipp PE=2 SV=3	Ipp
KYIEGVSDF	9	H-2-Kd	SB	585.72	Maxquant	Control	7602800	Control_1_1b	P28575	237_245	Actin-binding protein IPP OS=Mus musculus OX=10090 GN=Ipp PE=2 SV=3	Ipp
KYIHSADII	9	H-2-Kd	SB	23.57	Maxquant	TG	1119100	TG_2a	P47811	138_146	Mitogen-activated protein kinase 14 OS=Mus musculus OX=10090 GN=Mapk14 PE=1 SV=3	Mapk14
KYIHSADII	9	H-2-Kd	SB	23.57	Maxquant	TG	1182600	TG_2c	P47811	138_146	Mitogen-activated protein kinase 14 OS=Mus musculus OX=10090 GN=Mapk14 PE=1 SV=3	Mapk14
KYIHSADII	9	H-2-Kd	SB	23.57	Maxquant	Control	277440	Control_1_1c	P47811	138_146	Mitogen-activated protein kinase 14 OS=Mus musculus OX=10090 GN=Mapk14 PE=1 SV=3	Mapk14
KYIHSADII	9	H-2-Kd	SB	23.57	Maxquant	TG	9786900	TG_1c	P47811	138_146	Mitogen-activated protein kinase 14 OS=Mus musculus OX=10090 GN=Mapk14 PE=1 SV=3	Mapk14
KYIHSANVL	9	H-2-Kd	SB	19.85	Maxquant	TG	32039000	TG_2c	Q63844	155_163	Mitogen-activated protein kinase 3 OS=Mus musculus OX=10090 GN=Mapk3 PE=1 SV=5	Mapk3
KYIHSANVL	9	H-2-Kd	SB	19.85	Maxquant	HG	27378000	HG_1c	Q63844	155_163	Mitogen-activated protein kinase 3 OS=Mus musculus OX=10090 GN=Mapk3 PE=1 SV=5	Mapk3
KYIHSANVL	9	H-2-Kd	SB	19.85	PD Mascot	Control	210000000	Control_1_1a	Q63844	155_163	Mitogen-activated protein kinase 3 OS=Mus musculus OX=10090 GN=Mapk3 PE=1 SV=5	Mapk3
KYIHSANVL	9	H-2-Kd	SB	19.85	PD Sequest	TG	64000000	TG_2b	Q63844	155_163	Mitogen-activated protein kinase 3 OS=Mus musculus OX=10090 GN=Mapk3 PE=1 SV=5	Mapk3
KYIHSANVL	9	H-2-Kd	SB	19.85	PD Mascot	HG	57000000	HG_1b	Q63844	155_163	Mitogen-activated protein kinase 3 OS=Mus musculus OX=10090 GN=Mapk3 PE=1 SV=5	Mapk3
KYIHSANVL	9	H-2-Kd	SB	19.85	Maxquant	HG	27897000	HG_2a	Q63844	155_163	Mitogen-activated protein kinase 3 OS=Mus musculus OX=10090 GN=Mapk3 PE=1 SV=5	Mapk3
KYIHSANVL	9	H-2-Kd	SB	19.85	PD Sequest	Control	240000000	Control_1_1c	Q63844	155_163	Mitogen-activated protein kinase 3 OS=Mus musculus OX=10090 GN=Mapk3 PE=1 SV=5	Mapk3
KYIHSANVL	9	H-2-Kd	SB	19.85	Maxquant	TG	160440000	TG_1c	Q63844	155_163	Mitogen-activated protein kinase 3 OS=Mus musculus OX=10090 GN=Mapk3 PE=1 SV=5	Mapk3
KYIHSANVL	9	H-2-Kd	SB	19.85	Maxquant	TG	141010000	TG_1b	Q63844	155_163	Mitogen-activated protein kinase 3 OS=Mus musculus OX=10090 GN=Mapk3 PE=1 SV=5	Mapk3
KYIHSANVL	9	H-2-Kd	SB	19.85	Maxquant	Control	500170	Control_1_2c	Q63844	155_163	Mitogen-activated protein kinase 3 OS=Mus musculus OX=10090 GN=Mapk3 PE=1 SV=5	Mapk3
KYIHSANVL	9	H-2-Kd	SB	19.85	Maxquant	HG	24685000	HG_1a	Q63844	155_163	Mitogen-activated protein kinase 3 OS=Mus musculus OX=10090 GN=Mapk3 PE=1 SV=5	Mapk3
KYIHSANVL	9	H-2-Kd	SB	19.85	PD Sequest	HG	66000000	HG_2b	Q63844	155_163	Mitogen-activated protein kinase 3 OS=Mus musculus OX=10090 GN=Mapk3 PE=1 SV=5	Mapk3
KYIHSANVL	9	H-2-Kd	SB	19.85	Maxquant	TG	33514000	TG_2b	Q63844	155_163	Mitogen-activated protein kinase 3 OS=Mus musculus OX=10090 GN=Mapk3 PE=1 SV=5	Mapk3
KYIHSANVL	9	H-2-Kd	SB	19.85	PD Mascot	HG	66000000	HG_2c	Q63844	155_163	Mitogen-activated protein kinase 3 OS=Mus musculus OX=10090 GN=Mapk3 PE=1 SV=5	Mapk3
KYIHSANVL	9	H-2-Kd	SB	19.85	PD Sequest	HG	57000000	HG_1b	Q63844	155_163	Mitogen-activated protein kinase 3 OS=Mus musculus OX=10090 GN=Mapk3 PE=1 SV=5	Mapk3
KYIHSANVL	9	H-2-Kd	SB	19.85	Maxquant	HG	28784000	HG_2b	Q63844	155_163	Mitogen-activated protein kinase 3 OS=Mus musculus OX=10090 GN=Mapk3 PE=1 SV=5	Mapk3
KYIHSANVL	9	H-2-Kd	SB	19.85	PD Sequest	TG	230000000	TG_1c	Q63844	155_163	Mitogen-activated protein kinase 3 OS=Mus musculus OX=10090 GN=Mapk3 PE=1 SV=5	Mapk3
KYIHSANVL	9	H-2-Kd	SB	19.85	PD Sequest	TG	280000000	TG_1a	Q63844	155_163	Mitogen-activated protein kinase 3 OS=Mus musculus OX=10090 GN=Mapk3 PE=1 SV=5	Mapk3
KYIHSANVL	9	H-2-Kd	SB	19.85	PD Sequest	HG	66000000	HG_2c	Q63844	155_163	Mitogen-activated protein kinase 3 OS=Mus musculus OX=10090 GN=Mapk3 PE=1 SV=5	Mapk3
KYIHSANVL	9	H-2-Kd	SB	19.85	PD Mascot	Control	240000000	Control_1_1c	Q63844	155_163	Mitogen-activated protein kinase 3 OS=Mus musculus OX=10090 GN=Mapk3 PE=1 SV=5	Mapk3
KYIHSANVL	9	H-2-Kd	SB	19.85	Maxquant	Control	98811000	Control_1_1a	Q63844	155_163	Mitogen-activated protein kinase 3 OS=Mus musculus OX=10090 GN=Mapk3 PE=1 SV=5	Mapk3
KYIHSANVL	9	H-2-Kd	SB	19.85	PD Mascot	TG	280000000	TG_1a	Q63844	155_163	Mitogen-activated protein kinase 3 OS=Mus musculus OX=10090 GN=Mapk3 PE=1 SV=5	Mapk3
KYIHSANVL	9	H-2-Kd	SB	19.85	PD Mascot	TG	230000000	TG_1c	Q63844	155_163	Mitogen-activated protein kinase 3 OS=Mus musculus OX=10090 GN=Mapk3 PE=1 SV=5	Mapk3
KYIHSANVL	9	H-2-Kd	SB	19.85	PD Sequest	Control	210000000	Control_1_1a	Q63844	155_163	Mitogen-activated protein kinase 3 OS=Mus musculus OX=10090 GN=Mapk3 PE=1 SV=5	Mapk3
KYIHSANVL	9	H-2-Kd	SB	19.85	PD Sequest	TG	64000000	TG_2a	Q63844	155_163	Mitogen-activated protein kinase 3 OS=Mus musculus OX=10090 GN=Mapk3 PE=1 SV=5	Mapk3
KYIHSANVL	9	H-2-Kd	SB	19.85	Maxquant	HG	33570000	HG_2c	Q63844	155_163	Mitogen-activated protein kinase 3 OS=Mus musculus OX=10090 GN=Mapk3 PE=1 SV=5	Mapk3
KYIHSANVL	9	H-2-Kd	SB	19.85	Maxquant	Control	54960000	Control_1_1b	Q63844	155_163	Mitogen-activated protein kinase 3 OS=Mus musculus OX=10090 GN=Mapk3 PE=1 SV=5	Mapk3
KYIHSANVL	9	H-2-Kd	SB	19.85	PD Sequest	HG	57000000	HG_1a	Q63844	155_163	Mitogen-activated protein kinase 3 OS=Mus musculus OX=10090 GN=Mapk3 PE=1 SV=5	Mapk3
KYIHSANVL	9	H-2-Kd	SB	19.85	Maxquant	TG	32692000	TG_2a	Q63844	155_163	Mitogen-activated protein kinase 3 OS=Mus musculus OX=10090 GN=Mapk3 PE=1 SV=5	Mapk3
KYIHSANVL	9	H-2-Kd	SB	19.85	PD Mascot	TG	64000000	TG_2a	Q63844	155_163	Mitogen-activated protein kinase 3 OS=Mus musculus OX=10090 GN=Mapk3 PE=1 SV=5	Mapk3
KYIHSANVL	9	H-2-Kd	SB	19.85	PD Sequest	TG	62000000	TG_2c	Q63844	155_163	Mitogen-activated protein kinase 3 OS=Mus musculus OX=10090 GN=Mapk3 PE=1 SV=5	Mapk3
KYIHSANVL	9	H-2-Kd	SB	19.85	Maxquant	Control	116050000	Control_1_1c	Q63844	155_163	Mitogen-activated protein kinase 3 OS=Mus musculus OX=10090 GN=Mapk3 PE=1 SV=5	Mapk3
KYIHSANVL	9	H-2-Kd	SB	19.85	PD Mascot	HG	57000000	HG_1a	Q63844	155_163	Mitogen-activated protein kinase 3 OS=Mus musculus OX=10090 GN=Mapk3 PE=1 SV=5	Mapk3
KYIHSANVL	9	H-2-Kd	SB	19.85	Maxquant	HG	28894000	HG_1b	Q63844	155_163	Mitogen-activated protein kinase 3 OS=Mus musculus OX=10090 GN=Mapk3 PE=1 SV=5	Mapk3
KYIHSANVL	9	H-2-Kd	SB	19.85	PD Mascot	HG	66000000	HG_2b	Q63844	155_163	Mitogen-activated protein kinase 3 OS=Mus musculus OX=10090 GN=Mapk3 PE=1 SV=5	Mapk3
KYIHSANVL	9	H-2-Kd	SB	19.85	Maxquant	TG	148990000	TG_1a	Q63844	155_163	Mitogen-activated protein kinase 3 OS=Mus musculus OX=10090 GN=Mapk3 PE=1 SV=5	Mapk3
KYIKMFVL	8	H-2-Kd	SB	290.89	PD Mascot	TG	27000000	TG_1c	P60843	173_180	Eukaryotic initiation factor 4A-I OS=Mus musculus OX=10090 GN=Eif4a1 PE=1 SV=1	Eif4a1
KYIKMFVL	8	H-2-Kd	SB	290.89	PD Mascot	HG	1200000	HG_1b	P60843	173_180	Eukaryotic initiation factor 4A-I OS=Mus musculus OX=10090 GN=Eif4a1 PE=1 SV=1	Eif4a1
KYIKMFVL	8	H-2-Kd	SB	290.89	PD Mascot	Control	13000000	Control_1_1a	P60843	173_180	Eukaryotic initiation factor 4A-I OS=Mus musculus OX=10090 GN=Eif4a1 PE=1 SV=1	Eif4a1
KYIKMFVL	8	H-2-Kd	SB	290.89	PD Mascot	TG	8500000	TG_2b	P60843	173_180	Eukaryotic initiation factor 4A-I OS=Mus musculus OX=10090 GN=Eif4a1 PE=1 SV=1	Eif4a1
KYIKMFVL	8	H-2-Kd	SB	290.89	PD Mascot	TG	27000000	TG_1a	P60843	173_180	Eukaryotic initiation factor 4A-I OS=Mus musculus OX=10090 GN=Eif4a1 PE=1 SV=1	Eif4a1
KYIKMFVL	8	H-2-Kd	SB	290.89	PD Mascot	HG	6800000	HG_2c	P60843	173_180	Eukaryotic initiation factor 4A-I OS=Mus musculus OX=10090 GN=Eif4a1 PE=1 SV=1	Eif4a1
KYIKMFVL	8	H-2-Kd	SB	290.89	PD Mascot	HG	10000000	HG_2b	P60843	173_180	Eukaryotic initiation factor 4A-I OS=Mus musculus OX=10090 GN=Eif4a1 PE=1 SV=1	Eif4a1
KYIKMFVL	8	H-2-Kd	SB	290.89	PD Mascot	TG	7200000	TG_2c	P60843	173_180	Eukaryotic initiation factor 4A-I OS=Mus musculus OX=10090 GN=Eif4a1 PE=1 SV=1	Eif4a1
KYIKMFVL	8	H-2-Kd	SB	290.89	PD Mascot	Control	13000000	Control_1_1c	P60843	173_180	Eukaryotic initiation factor 4A-I OS=Mus musculus OX=10090 GN=Eif4a1 PE=1 SV=1	Eif4a1
KYIKMFVL	8	H-2-Kd	SB	290.89	PD Mascot	Control	13000000	Control_1_1b	P60843	173_180	Eukaryotic initiation factor 4A-I OS=Mus musculus OX=10090 GN=Eif4a1 PE=1 SV=1	Eif4a1
KYIKMFVL	8	H-2-Kd	SB	290.89	PD Mascot	TG	27000000	TG_1b	P60843	173_180	Eukaryotic initiation factor 4A-I OS=Mus musculus OX=10090 GN=Eif4a1 PE=1 SV=1	Eif4a1
KYIKMFVL	8	H-2-Kd	SB	290.89	PD Mascot	TG	8600000	TG_2a	P60843	173_180	Eukaryotic initiation factor 4A-I OS=Mus musculus OX=10090 GN=Eif4a1 PE=1 SV=1	Eif4a1
KYIPNRGPL	9	H-2-Kd	SB	27.06	Maxquant	HG	1277100	HG_1a	Q6ZWV3	197_205	60S ribosomal protein L10 OS=Mus musculus OX=10090 GN=Rpl10 PE=1 SV=3	Rpl10
KYIPNRGPL	9	H-2-Kd	SB	27.06	PD Mascot	TG	27000000	TG_1c	Q6ZWV3	197_205	60S ribosomal protein L10 OS=Mus musculus OX=10090 GN=Rpl10 PE=1 SV=3	Rpl10
KYIPNRGPL	9	H-2-Db	WB	4860.23	PD Sequest	Control	13000000	Control_1_1c	Q6ZWV3	197_205	60S ribosomal protein L10 OS=Mus musculus OX=10090 GN=Rpl10 PE=1 SV=3	Rpl10
KYIPNRGPL	9	H-2-Kd	SB	27.06	Maxquant	TG	12892000	TG_1c	Q6ZWV3	197_205	60S ribosomal protein L10 OS=Mus musculus OX=10090 GN=Rpl10 PE=1 SV=3	Rpl10
KYIPNRGPL	9	H-2-Kd	SB	27.06	PD Sequest	TG	8500000	TG_2b	Q6ZWV3	197_205	60S ribosomal protein L10 OS=Mus musculus OX=10090 GN=Rpl10 PE=1 SV=3	Rpl10
KYIPNRGPL	9	H-2-Db	WB	4860.23	Maxquant	TG	12892000	TG_1c	Q6ZWV3	197_205	60S ribosomal protein L10 OS=Mus musculus OX=10090 GN=Rpl10 PE=1 SV=3	Rpl10
KYIPNRGPL	9	H-2-Db	WB	4860.23	PD Sequest	Control	13000000	Control_1_1b	Q6ZWV3	197_205	60S ribosomal protein L10 OS=Mus musculus OX=10090 GN=Rpl10 PE=1 SV=3	Rpl10
KYIPNRGPL	9	H-2-Kd	SB	27.06	Maxquant	Control	5513500	Control_1_1a	Q6ZWV3	197_205	60S ribosomal protein L10 OS=Mus musculus OX=10090 GN=Rpl10 PE=1 SV=3	Rpl10
KYIPNRGPL	9	H-2-Db	WB	4860.23	PD Mascot	HG	1200000	HG_1b	Q6ZWV3	197_205	60S ribosomal protein L10 OS=Mus musculus OX=10090 GN=Rpl10 PE=1 SV=3	Rpl10
KYIPNRGPL	9	H-2-Kd	SB	27.06	Maxquant	HG	3779600	HG_2c	Q6ZWV3	197_205	60S ribosomal protein L10 OS=Mus musculus OX=10090 GN=Rpl10 PE=1 SV=3	Rpl10
KYIPNRGPL	9	H-2-Db	WB	4860.23	Maxquant	HG	3953500	HG_2a	Q6ZWV3	197_205	60S ribosomal protein L10 OS=Mus musculus OX=10090 GN=Rpl10 PE=1 SV=3	Rpl10
KYIPNRGPL	9	H-2-Db	WB	4860.23	Maxquant	TG	3653200	TG_2c	Q6ZWV3	197_205	60S ribosomal protein L10 OS=Mus musculus OX=10090 GN=Rpl10 PE=1 SV=3	Rpl10
KYIPNRGPL	9	H-2-Db	WB	4860.23	Maxquant	HG	1012300	HG_1c	Q6ZWV3	197_205	60S ribosomal protein L10 OS=Mus musculus OX=10090 GN=Rpl10 PE=1 SV=3	Rpl10
KYIPNRGPL	9	H-2-Kd	SB	27.06	PD Mascot	TG	27000000	TG_1a	Q6ZWV3	197_205	60S ribosomal protein L10 OS=Mus musculus OX=10090 GN=Rpl10 PE=1 SV=3	Rpl10
KYIPNRGPL	9	H-2-Kd	SB	27.06	PD Sequest	HG	10000000	HG_2b	Q6ZWV3	197_205	60S ribosomal protein L10 OS=Mus musculus OX=10090 GN=Rpl10 PE=1 SV=3	Rpl10
KYIPNRGPL	9	H-2-Db	WB	4860.23	PD Mascot	TG	8500000	TG_2b	Q6ZWV3	197_205	60S ribosomal protein L10 OS=Mus musculus OX=10090 GN=Rpl10 PE=1 SV=3	Rpl10
KYIPNRGPL	9	H-2-Db	WB	4860.23	Maxquant	Control	5513500	Control_1_1a	Q6ZWV3	197_205	60S ribosomal protein L10 OS=Mus musculus OX=10090 GN=Rpl10 PE=1 SV=3	Rpl10
KYIPNRGPL	9	H-2-Db	WB	4860.23	PD Sequest	Control	13000000	Control_1_1a	Q6ZWV3	197_205	60S ribosomal protein L10 OS=Mus musculus OX=10090 GN=Rpl10 PE=1 SV=3	Rpl10
KYIPNRGPL	9	H-2-Kd	SB	27.06	PD Mascot	TG	8600000	TG_2a	Q6ZWV3	197_205	60S ribosomal protein L10 OS=Mus musculus OX=10090 GN=Rpl10 PE=1 SV=3	Rpl10
KYIPNRGPL	9	H-2-Db	WB	4860.23	PD Sequest	TG	27000000	TG_1a	Q6ZWV3	197_205	60S ribosomal protein L10 OS=Mus musculus OX=10090 GN=Rpl10 PE=1 SV=3	Rpl10
KYIPNRGPL	9	H-2-Db	WB	4860.23	Maxquant	HG	3779600	HG_2c	Q6ZWV3	197_205	60S ribosomal protein L10 OS=Mus musculus OX=10090 GN=Rpl10 PE=1 SV=3	Rpl10
KYIPNRGPL	9	H-2-Kd	SB	27.06	Maxquant	HG	1012300	HG_1c	Q6ZWV3	197_205	60S ribosomal protein L10 OS=Mus musculus OX=10090 GN=Rpl10 PE=1 SV=3	Rpl10
KYIPNRGPL	9	H-2-Kd	SB	27.06	PD Sequest	TG	8600000	TG_2a	Q6ZWV3	197_205	60S ribosomal protein L10 OS=Mus musculus OX=10090 GN=Rpl10 PE=1 SV=3	Rpl10
KYIPNRGPL	9	H-2-Db	WB	4860.23	PD Mascot	TG	7200000	TG_2c	Q6ZWV3	197_205	60S ribosomal protein L10 OS=Mus musculus OX=10090 GN=Rpl10 PE=1 SV=3	Rpl10
KYIPNRGPL	9	H-2-Kd	SB	27.06	PD Mascot	TG	8500000	TG_2b	Q6ZWV3	197_205	60S ribosomal protein L10 OS=Mus musculus OX=10090 GN=Rpl10 PE=1 SV=3	Rpl10
KYIPNRGPL	9	H-2-Kd	SB	27.06	Maxquant	TG	3653200	TG_2c	Q6ZWV3	197_205	60S ribosomal protein L10 OS=Mus musculus OX=10090 GN=Rpl10 PE=1 SV=3	Rpl10
KYIPNRGPL	9	H-2-Db	WB	4860.23	PD Sequest	HG	1200000	HG_1b	Q6ZWV3	197_205	60S ribosomal protein L10 OS=Mus musculus OX=10090 GN=Rpl10 PE=1 SV=3	Rpl10
KYIPNRGPL	9	H-2-Db	WB	4860.23	PD Mascot	HG	10000000	HG_2b	Q6ZWV3	197_205	60S ribosomal protein L10 OS=Mus musculus OX=10090 GN=Rpl10 PE=1 SV=3	Rpl10
KYIPNRGPL	9	H-2-Kd	SB	27.06	PD Sequest	TG	27000000	TG_1a	Q6ZWV3	197_205	60S ribosomal protein L10 OS=Mus musculus OX=10090 GN=Rpl10 PE=1 SV=3	Rpl10
KYIPNRGPL	9	H-2-Kd	SB	27.06	Maxquant	HG	3953500	HG_2a	Q6ZWV3	197_205	60S ribosomal protein L10 OS=Mus musculus OX=10090 GN=Rpl10 PE=1 SV=3	Rpl10
KYIPNRGPL	9	H-2-Kd	SB	27.06	Maxquant	Control	6338000	Control_1_1b	Q6ZWV3	197_205	60S ribosomal protein L10 OS=Mus musculus OX=10090 GN=Rpl10 PE=1 SV=3	Rpl10
KYIPNRGPL	9	H-2-Db	WB	4860.23	Maxquant	Control	6338000	Control_1_1b	Q6ZWV3	197_205	60S ribosomal protein L10 OS=Mus musculus OX=10090 GN=Rpl10 PE=1 SV=3	Rpl10
KYIPNRGPL	9	H-2-Db	WB	4860.23	PD Mascot	TG	27000000	TG_1a	Q6ZWV3	197_205	60S ribosomal protein L10 OS=Mus musculus OX=10090 GN=Rpl10 PE=1 SV=3	Rpl10
KYIPNRGPL	9	H-2-Kd	SB	27.06	Maxquant	TG	12114000	TG_1b	Q6ZWV3	197_205	60S ribosomal protein L10 OS=Mus musculus OX=10090 GN=Rpl10 PE=1 SV=3	Rpl10
KYIPNRGPL	9	H-2-Kd	SB	27.06	PD Mascot	HG	1200000	HG_1b	Q6ZWV3	197_205	60S ribosomal protein L10 OS=Mus musculus OX=10090 GN=Rpl10 PE=1 SV=3	Rpl10
KYIPNRGPL	9	H-2-Db	WB	4860.23	Maxquant	HG	1277100	HG_1a	Q6ZWV3	197_205	60S ribosomal protein L10 OS=Mus musculus OX=10090 GN=Rpl10 PE=1 SV=3	Rpl10
KYIPNRGPL	9	H-2-Kd	SB	27.06	PD Sequest	TG	27000000	TG_1b	Q6ZWV3	197_205	60S ribosomal protein L10 OS=Mus musculus OX=10090 GN=Rpl10 PE=1 SV=3	Rpl10
KYIPNRGPL	9	H-2-Kd	SB	27.06	PD Sequest	Control	13000000	Control_1_1a	Q6ZWV3	197_205	60S ribosomal protein L10 OS=Mus musculus OX=10090 GN=Rpl10 PE=1 SV=3	Rpl10
KYIPNRGPL	9	H-2-Db	WB	4860.23	PD Sequest	TG	27000000	TG_1b	Q6ZWV3	197_205	60S ribosomal protein L10 OS=Mus musculus OX=10090 GN=Rpl10 PE=1 SV=3	Rpl10
KYIPNRGPL	9	H-2-Kd	SB	27.06	PD Mascot	HG	6800000	HG_2c	Q6ZWV3	197_205	60S ribosomal protein L10 OS=Mus musculus OX=10090 GN=Rpl10 PE=1 SV=3	Rpl10
KYIPNRGPL	9	H-2-Kd	SB	27.06	PD Mascot	HG	9200000	HG_2a	Q6ZWV3	197_205	60S ribosomal protein L10 OS=Mus musculus OX=10090 GN=Rpl10 PE=1 SV=3	Rpl10
KYIPNRGPL	9	H-2-Db	WB	4860.23	PD Mascot	TG	8600000	TG_2a	Q6ZWV3	197_205	60S ribosomal protein L10 OS=Mus musculus OX=10090 GN=Rpl10 PE=1 SV=3	Rpl10
KYIPNRGPL	9	H-2-Db	WB	4860.23	PD Mascot	Control	13000000	Control_1_1b	Q6ZWV3	197_205	60S ribosomal protein L10 OS=Mus musculus OX=10090 GN=Rpl10 PE=1 SV=3	Rpl10
KYIPNRGPL	9	H-2-Kd	SB	27.06	PD Sequest	HG	1200000	HG_1b	Q6ZWV3	197_205	60S ribosomal protein L10 OS=Mus musculus OX=10090 GN=Rpl10 PE=1 SV=3	Rpl10
KYIPNRGPL	9	H-2-Db	WB	4860.23	PD Mascot	HG	9200000	HG_2a	Q6ZWV3	197_205	60S ribosomal protein L10 OS=Mus musculus OX=10090 GN=Rpl10 PE=1 SV=3	Rpl10
KYIPNRGPL	9	H-2-Kd	SB	27.06	PD Sequest	HG	9200000	HG_2a	Q6ZWV3	197_205	60S ribosomal protein L10 OS=Mus musculus OX=10090 GN=Rpl10 PE=1 SV=3	Rpl10
KYIPNRGPL	9	H-2-Db	WB	4860.23	PD Mascot	Control	13000000	Control_1_1c	Q6ZWV3	197_205	60S ribosomal protein L10 OS=Mus musculus OX=10090 GN=Rpl10 PE=1 SV=3	Rpl10
KYIPNRGPL	9	H-2-Db	WB	4860.23	PD Mascot	TG	27000000	TG_1c	Q6ZWV3	197_205	60S ribosomal protein L10 OS=Mus musculus OX=10090 GN=Rpl10 PE=1 SV=3	Rpl10
KYIPNRGPL	9	H-2-Kd	SB	27.06	PD Sequest	TG	27000000	TG_1c	Q6ZWV3	197_205	60S ribosomal protein L10 OS=Mus musculus OX=10090 GN=Rpl10 PE=1 SV=3	Rpl10
KYIPNRGPL	9	H-2-Kd	SB	27.06	PD Sequest	HG	6800000	HG_2c	Q6ZWV3	197_205	60S ribosomal protein L10 OS=Mus musculus OX=10090 GN=Rpl10 PE=1 SV=3	Rpl10
KYIPNRGPL	9	H-2-Kd	SB	27.06	PD Sequest	Control	13000000	Control_1_1c	Q6ZWV3	197_205	60S ribosomal protein L10 OS=Mus musculus OX=10090 GN=Rpl10 PE=1 SV=3	Rpl10
KYIPNRGPL	9	H-2-Kd	SB	27.06	PD Sequest	TG	7200000	TG_2c	Q6ZWV3	197_205	60S ribosomal protein L10 OS=Mus musculus OX=10090 GN=Rpl10 PE=1 SV=3	Rpl10
KYIPNRGPL	9	H-2-Db	WB	4860.23	PD Sequest	TG	8600000	TG_2a	Q6ZWV3	197_205	60S ribosomal protein L10 OS=Mus musculus OX=10090 GN=Rpl10 PE=1 SV=3	Rpl10
KYIPNRGPL	9	H-2-Db	WB	4860.23	PD Sequest	HG	9200000	HG_2a	Q6ZWV3	197_205	60S ribosomal protein L10 OS=Mus musculus OX=10090 GN=Rpl10 PE=1 SV=3	Rpl10
KYIPNRGPL	9	H-2-Kd	SB	27.06	Maxquant	Control	5482800	Control_1_1c	Q6ZWV3	197_205	60S ribosomal protein L10 OS=Mus musculus OX=10090 GN=Rpl10 PE=1 SV=3	Rpl10
KYIPNRGPL	9	H-2-Db	WB	4860.23	Maxquant	TG	3827500	TG_2b	Q6ZWV3	197_205	60S ribosomal protein L10 OS=Mus musculus OX=10090 GN=Rpl10 PE=1 SV=3	Rpl10
KYIPNRGPL	9	H-2-Db	WB	4860.23	Maxquant	HG	5365600	HG_2b	Q6ZWV3	197_205	60S ribosomal protein L10 OS=Mus musculus OX=10090 GN=Rpl10 PE=1 SV=3	Rpl10
KYIPNRGPL	9	H-2-Kd	SB	27.06	Maxquant	TG	3656800	TG_2a	Q6ZWV3	197_205	60S ribosomal protein L10 OS=Mus musculus OX=10090 GN=Rpl10 PE=1 SV=3	Rpl10
KYIPNRGPL	9	H-2-Db	WB	4860.23	Maxquant	TG	12114000	TG_1b	Q6ZWV3	197_205	60S ribosomal protein L10 OS=Mus musculus OX=10090 GN=Rpl10 PE=1 SV=3	Rpl10
KYIPNRGPL	9	H-2-Kd	SB	27.06	Maxquant	HG	5365600	HG_2b	Q6ZWV3	197_205	60S ribosomal protein L10 OS=Mus musculus OX=10090 GN=Rpl10 PE=1 SV=3	Rpl10
KYIPNRGPL	9	H-2-Kd	SB	27.06	PD Mascot	Control	13000000	Control_1_1b	Q6ZWV3	197_205	60S ribosomal protein L10 OS=Mus musculus OX=10090 GN=Rpl10 PE=1 SV=3	Rpl10
KYIPNRGPL	9	H-2-Db	WB	4860.23	PD Sequest	HG	10000000	HG_2b	Q6ZWV3	197_205	60S ribosomal protein L10 OS=Mus musculus OX=10090 GN=Rpl10 PE=1 SV=3	Rpl10
KYIPNRGPL	9	H-2-Db	WB	4860.23	PD Sequest	TG	8500000	TG_2b	Q6ZWV3	197_205	60S ribosomal protein L10 OS=Mus musculus OX=10090 GN=Rpl10 PE=1 SV=3	Rpl10
KYIPNRGPL	9	H-2-Kd	SB	27.06	PD Mascot	TG	7200000	TG_2c	Q6ZWV3	197_205	60S ribosomal protein L10 OS=Mus musculus OX=10090 GN=Rpl10 PE=1 SV=3	Rpl10
KYIPNRGPL	9	H-2-Kd	SB	27.06	PD Mascot	Control	13000000	Control_1_1c	Q6ZWV3	197_205	60S ribosomal protein L10 OS=Mus musculus OX=10090 GN=Rpl10 PE=1 SV=3	Rpl10
KYIPNRGPL	9	H-2-Db	WB	4860.23	PD Sequest	HG	6800000	HG_2c	Q6ZWV3	197_205	60S ribosomal protein L10 OS=Mus musculus OX=10090 GN=Rpl10 PE=1 SV=3	Rpl10
KYIPNRGPL	9	H-2-Kd	SB	27.06	PD Sequest	Control	13000000	Control_1_1b	Q6ZWV3	197_205	60S ribosomal protein L10 OS=Mus musculus OX=10090 GN=Rpl10 PE=1 SV=3	Rpl10
KYIPNRGPL	9	H-2-Db	WB	4860.23	Maxquant	TG	3656800	TG_2a	Q6ZWV3	197_205	60S ribosomal protein L10 OS=Mus musculus OX=10090 GN=Rpl10 PE=1 SV=3	Rpl10
KYIPNRGPL	9	H-2-Kd	SB	27.06	Maxquant	HG	1201400	HG_1b	Q6ZWV3	197_205	60S ribosomal protein L10 OS=Mus musculus OX=10090 GN=Rpl10 PE=1 SV=3	Rpl10
KYIPNRGPL	9	H-2-Db	WB	4860.23	PD Mascot	Control	13000000	Control_1_1a	Q6ZWV3	197_205	60S ribosomal protein L10 OS=Mus musculus OX=10090 GN=Rpl10 PE=1 SV=3	Rpl10
KYIPNRGPL	9	H-2-Db	WB	4860.23	PD Mascot	TG	27000000	TG_1b	Q6ZWV3	197_205	60S ribosomal protein L10 OS=Mus musculus OX=10090 GN=Rpl10 PE=1 SV=3	Rpl10
KYIPNRGPL	9	H-2-Kd	SB	27.06	PD Mascot	TG	27000000	TG_1b	Q6ZWV3	197_205	60S ribosomal protein L10 OS=Mus musculus OX=10090 GN=Rpl10 PE=1 SV=3	Rpl10
KYIPNRGPL	9	H-2-Db	WB	4860.23	Maxquant	TG	12450000	TG_1a	Q6ZWV3	197_205	60S ribosomal protein L10 OS=Mus musculus OX=10090 GN=Rpl10 PE=1 SV=3	Rpl10
KYIPNRGPL	9	H-2-Db	WB	4860.23	Maxquant	Control	5482800	Control_1_1c	Q6ZWV3	197_205	60S ribosomal protein L10 OS=Mus musculus OX=10090 GN=Rpl10 PE=1 SV=3	Rpl10
KYIPNRGPL	9	H-2-Db	WB	4860.23	PD Mascot	HG	6800000	HG_2c	Q6ZWV3	197_205	60S ribosomal protein L10 OS=Mus musculus OX=10090 GN=Rpl10 PE=1 SV=3	Rpl10
KYIPNRGPL	9	H-2-Kd	SB	27.06	PD Mascot	HG	10000000	HG_2b	Q6ZWV3	197_205	60S ribosomal protein L10 OS=Mus musculus OX=10090 GN=Rpl10 PE=1 SV=3	Rpl10
KYIPNRGPL	9	H-2-Db	WB	4860.23	PD Sequest	TG	27000000	TG_1c	Q6ZWV3	197_205	60S ribosomal protein L10 OS=Mus musculus OX=10090 GN=Rpl10 PE=1 SV=3	Rpl10
KYIPNRGPL	9	H-2-Kd	SB	27.06	Maxquant	TG	3827500	TG_2b	Q6ZWV3	197_205	60S ribosomal protein L10 OS=Mus musculus OX=10090 GN=Rpl10 PE=1 SV=3	Rpl10
KYIPNRGPL	9	H-2-Db	WB	4860.23	Maxquant	HG	1201400	HG_1b	Q6ZWV3	197_205	60S ribosomal protein L10 OS=Mus musculus OX=10090 GN=Rpl10 PE=1 SV=3	Rpl10
KYIPNRGPL	9	H-2-Db	WB	4860.23	PD Sequest	TG	7200000	TG_2c	Q6ZWV3	197_205	60S ribosomal protein L10 OS=Mus musculus OX=10090 GN=Rpl10 PE=1 SV=3	Rpl10
KYIPNRGPL	9	H-2-Kd	SB	27.06	PD Mascot	Control	13000000	Control_1_1a	Q6ZWV3	197_205	60S ribosomal protein L10 OS=Mus musculus OX=10090 GN=Rpl10 PE=1 SV=3	Rpl10
KYIPNRGPL	9	H-2-Kd	SB	27.06	Maxquant	TG	12450000	TG_1a	Q6ZWV3	197_205	60S ribosomal protein L10 OS=Mus musculus OX=10090 GN=Rpl10 PE=1 SV=3	Rpl10
KYITTLEDL	9	H-2-Kd	SB	26.75	PD Mascot	TG	39000000	TG_1a	Q7TN22	139_147	Thioredoxin domain-containing protein 16 OS=Mus musculus OX=10090 GN=Txndc16 PE=2 SV=1	Txndc16
KYITTLEDL	9	H-2-Kd	SB	26.75	Maxquant	TG	15214000	TG_1b	Q7TN22	139_147	Thioredoxin domain-containing protein 16 OS=Mus musculus OX=10090 GN=Txndc16 PE=2 SV=1	Txndc16
KYITTLEDL	9	H-2-Kd	SB	26.75	Maxquant	TG	1285800	TG_2a	Q7TN22	139_147	Thioredoxin domain-containing protein 16 OS=Mus musculus OX=10090 GN=Txndc16 PE=2 SV=1	Txndc16
KYITTLEDL	9	H-2-Kd	SB	26.75	PD Mascot	TG	39000000	TG_1b	Q7TN22	139_147	Thioredoxin domain-containing protein 16 OS=Mus musculus OX=10090 GN=Txndc16 PE=2 SV=1	Txndc16
KYITTLEDL	9	H-2-Kd	SB	26.75	Maxquant	TG	1672400	TG_2c	Q7TN22	139_147	Thioredoxin domain-containing protein 16 OS=Mus musculus OX=10090 GN=Txndc16 PE=2 SV=1	Txndc16
KYITTLEDL	9	H-2-Kd	SB	26.75	PD Sequest	TG	39000000	TG_1b	Q7TN22	139_147	Thioredoxin domain-containing protein 16 OS=Mus musculus OX=10090 GN=Txndc16 PE=2 SV=1	Txndc16
KYITTLEDL	9	H-2-Kd	SB	26.75	Maxquant	Control	1385500	Control_1_1b	Q7TN22	139_147	Thioredoxin domain-containing protein 16 OS=Mus musculus OX=10090 GN=Txndc16 PE=2 SV=1	Txndc16
KYITTLEDL	9	H-2-Kd	SB	26.75	Maxquant	HG	1311900	HG_2b	Q7TN22	139_147	Thioredoxin domain-containing protein 16 OS=Mus musculus OX=10090 GN=Txndc16 PE=2 SV=1	Txndc16
KYITTLEDL	9	H-2-Kd	SB	26.75	Maxquant	HG	1138600	HG_2a	Q7TN22	139_147	Thioredoxin domain-containing protein 16 OS=Mus musculus OX=10090 GN=Txndc16 PE=2 SV=1	Txndc16
KYITTLEDL	9	H-2-Kd	SB	26.75	PD Sequest	TG	2500000	TG_2a	Q7TN22	139_147	Thioredoxin domain-containing protein 16 OS=Mus musculus OX=10090 GN=Txndc16 PE=2 SV=1	Txndc16
KYITTLEDL	9	H-2-Kd	SB	26.75	PD Sequest	HG	2500000	HG_2c	Q7TN22	139_147	Thioredoxin domain-containing protein 16 OS=Mus musculus OX=10090 GN=Txndc16 PE=2 SV=1	Txndc16
KYITTLEDL	9	H-2-Kd	SB	26.75	Maxquant	TG	19236000	TG_1c	Q7TN22	139_147	Thioredoxin domain-containing protein 16 OS=Mus musculus OX=10090 GN=Txndc16 PE=2 SV=1	Txndc16
KYITTLEDL	9	H-2-Kd	SB	26.75	Maxquant	Control	1407500	Control_1_1a	Q7TN22	139_147	Thioredoxin domain-containing protein 16 OS=Mus musculus OX=10090 GN=Txndc16 PE=2 SV=1	Txndc16
KYITTLEDL	9	H-2-Kd	SB	26.75	PD Sequest	TG	38000000	TG_1c	Q7TN22	139_147	Thioredoxin domain-containing protein 16 OS=Mus musculus OX=10090 GN=Txndc16 PE=2 SV=1	Txndc16
KYITTLEDL	9	H-2-Kd	SB	26.75	Maxquant	TG	1520500	TG_2b	Q7TN22	139_147	Thioredoxin domain-containing protein 16 OS=Mus musculus OX=10090 GN=Txndc16 PE=2 SV=1	Txndc16
KYITTLEDL	9	H-2-Kd	SB	26.75	PD Mascot	TG	38000000	TG_1c	Q7TN22	139_147	Thioredoxin domain-containing protein 16 OS=Mus musculus OX=10090 GN=Txndc16 PE=2 SV=1	Txndc16
KYITTLEDL	9	H-2-Kd	SB	26.75	PD Sequest	Control	1800000	Control_1_1b	Q7TN22	139_147	Thioredoxin domain-containing protein 16 OS=Mus musculus OX=10090 GN=Txndc16 PE=2 SV=1	Txndc16
KYITTLEDL	9	H-2-Kd	SB	26.75	Maxquant	TG	17407000	TG_1a	Q7TN22	139_147	Thioredoxin domain-containing protein 16 OS=Mus musculus OX=10090 GN=Txndc16 PE=2 SV=1	Txndc16
KYITTLEDL	9	H-2-Kd	SB	26.75	PD Sequest	TG	39000000	TG_1a	Q7TN22	139_147	Thioredoxin domain-containing protein 16 OS=Mus musculus OX=10090 GN=Txndc16 PE=2 SV=1	Txndc16
KYITTLEDL	9	H-2-Kd	SB	26.75	Maxquant	HG	1713700	HG_2c	Q7TN22	139_147	Thioredoxin domain-containing protein 16 OS=Mus musculus OX=10090 GN=Txndc16 PE=2 SV=1	Txndc16
KYITTLEDL	9	H-2-Kd	SB	26.75	Maxquant	Control	816240	Control_1_1c	Q7TN22	139_147	Thioredoxin domain-containing protein 16 OS=Mus musculus OX=10090 GN=Txndc16 PE=2 SV=1	Txndc16
KYITTLEDL	9	H-2-Kd	SB	26.75	PD Mascot	HG	2500000	HG_2c	Q7TN22	139_147	Thioredoxin domain-containing protein 16 OS=Mus musculus OX=10090 GN=Txndc16 PE=2 SV=1	Txndc16
KYKASENAI	9	H-2-Kd	SB	16.9	Maxquant	HG	2090600	HG_2a	P84091	342_350	AP-2 complex subunit mu OS=Mus musculus OX=10090 GN=Ap2m1 PE=1 SV=1	Ap2m1
KYKASENAI	9	H-2-Kd	SB	16.9	Maxquant	TG	2110500	TG_1b	P84091	342_350	AP-2 complex subunit mu OS=Mus musculus OX=10090 GN=Ap2m1 PE=1 SV=1	Ap2m1
KYKASENAI	9	H-2-Kd	SB	16.9	PD Mascot	HG	4100000	HG_1c	P84091	342_350	AP-2 complex subunit mu OS=Mus musculus OX=10090 GN=Ap2m1 PE=1 SV=1	Ap2m1
KYKASENAI	9	H-2-Kd	SB	16.9	PD Mascot	HG	4900000	HG_1b	P84091	342_350	AP-2 complex subunit mu OS=Mus musculus OX=10090 GN=Ap2m1 PE=1 SV=1	Ap2m1
KYKASENAI	9	H-2-Kd	SB	16.9	Maxquant	HG	1269400	HG_2b	P84091	342_350	AP-2 complex subunit mu OS=Mus musculus OX=10090 GN=Ap2m1 PE=1 SV=1	Ap2m1
KYKASENAI	9	H-2-Kd	SB	16.9	PD Mascot	TG	13000000	TG_1a	P84091	342_350	AP-2 complex subunit mu OS=Mus musculus OX=10090 GN=Ap2m1 PE=1 SV=1	Ap2m1
KYKASENAI	9	H-2-Kd	SB	16.9	Maxquant	TG	1849200	TG_2c	P84091	342_350	AP-2 complex subunit mu OS=Mus musculus OX=10090 GN=Ap2m1 PE=1 SV=1	Ap2m1
KYKASENAI	9	H-2-Kd	SB	16.9	PD Mascot	TG	3500000	TG_1b	P84091	342_350	AP-2 complex subunit mu OS=Mus musculus OX=10090 GN=Ap2m1 PE=1 SV=1	Ap2m1
KYKASENAI	9	H-2-Kd	SB	16.9	PD Mascot	TG	3100000	TG_1a	P84091	342_350	AP-2 complex subunit mu OS=Mus musculus OX=10090 GN=Ap2m1 PE=1 SV=1	Ap2m1
KYKASENAI	9	H-2-Kd	SB	16.9	PD Mascot	Control	5400000	Control_1_1c	P84091	342_350	AP-2 complex subunit mu OS=Mus musculus OX=10090 GN=Ap2m1 PE=1 SV=1	Ap2m1
KYKASENAI	9	H-2-Kd	SB	16.9	Maxquant	Control	3824500	Control_1_1b	P84091	342_350	AP-2 complex subunit mu OS=Mus musculus OX=10090 GN=Ap2m1 PE=1 SV=1	Ap2m1
KYKASENAI	9	H-2-Kd	SB	16.9	Maxquant	Control	4929200	Control_1_1c	P84091	342_350	AP-2 complex subunit mu OS=Mus musculus OX=10090 GN=Ap2m1 PE=1 SV=1	Ap2m1
KYKASENAI	9	H-2-Kd	SB	16.9	PD Mascot	HG	4900000	HG_2a	P84091	342_350	AP-2 complex subunit mu OS=Mus musculus OX=10090 GN=Ap2m1 PE=1 SV=1	Ap2m1
KYKASENAI	9	H-2-Kd	SB	16.9	PD Mascot	HG	4500000	HG_1a	P84091	342_350	AP-2 complex subunit mu OS=Mus musculus OX=10090 GN=Ap2m1 PE=1 SV=1	Ap2m1
KYKASENAI	9	H-2-Kd	SB	16.9	Maxquant	Control	725860	Control_1_2b	P84091	342_350	AP-2 complex subunit mu OS=Mus musculus OX=10090 GN=Ap2m1 PE=1 SV=1	Ap2m1
KYKASENAI	9	H-2-Kd	SB	16.9	PD Mascot	Control	5300000	Control_1_1a	P84091	342_350	AP-2 complex subunit mu OS=Mus musculus OX=10090 GN=Ap2m1 PE=1 SV=1	Ap2m1
KYKASENAI	9	H-2-Kd	SB	16.9	Maxquant	TG	1449100	TG_1a	P84091	342_350	AP-2 complex subunit mu OS=Mus musculus OX=10090 GN=Ap2m1 PE=1 SV=1	Ap2m1
KYKASENAI	9	H-2-Kd	SB	16.9	Maxquant	HG	7945000	HG_1b	P84091	342_350	AP-2 complex subunit mu OS=Mus musculus OX=10090 GN=Ap2m1 PE=1 SV=1	Ap2m1
KYKASENAI	9	H-2-Kd	SB	16.9	PD Mascot	Control	5100000	Control_1_1b	P84091	342_350	AP-2 complex subunit mu OS=Mus musculus OX=10090 GN=Ap2m1 PE=1 SV=1	Ap2m1
KYKASENAI	9	H-2-Kd	SB	16.9	Maxquant	HG	3863000	HG_1a	P84091	342_350	AP-2 complex subunit mu OS=Mus musculus OX=10090 GN=Ap2m1 PE=1 SV=1	Ap2m1
KYKASENAI	9	H-2-Kd	SB	16.9	Maxquant	Control	990070	Control_1_2c	P84091	342_350	AP-2 complex subunit mu OS=Mus musculus OX=10090 GN=Ap2m1 PE=1 SV=1	Ap2m1
KYKASENAI	9	H-2-Kd	SB	16.9	Maxquant	TG	2520300	TG_1c	P84091	342_350	AP-2 complex subunit mu OS=Mus musculus OX=10090 GN=Ap2m1 PE=1 SV=1	Ap2m1
KYKASENAI	9	H-2-Kd	SB	16.9	PD Mascot	HG	2300000	HG_2c	P84091	342_350	AP-2 complex subunit mu OS=Mus musculus OX=10090 GN=Ap2m1 PE=1 SV=1	Ap2m1
KYKASENAI	9	H-2-Kd	SB	16.9	Maxquant	TG	1150500	TG_2b	P84091	342_350	AP-2 complex subunit mu OS=Mus musculus OX=10090 GN=Ap2m1 PE=1 SV=1	Ap2m1
KYKASENAI	9	H-2-Kd	SB	16.9	Maxquant	Control	658500	Control_1_2a	P84091	342_350	AP-2 complex subunit mu OS=Mus musculus OX=10090 GN=Ap2m1 PE=1 SV=1	Ap2m1
KYKASENAI	9	H-2-Kd	SB	16.9	Maxquant	HG	1735400	HG_2c	P84091	342_350	AP-2 complex subunit mu OS=Mus musculus OX=10090 GN=Ap2m1 PE=1 SV=1	Ap2m1
KYKASENAI	9	H-2-Kd	SB	16.9	Maxquant	Control	3570300	Control_1_1a	P84091	342_350	AP-2 complex subunit mu OS=Mus musculus OX=10090 GN=Ap2m1 PE=1 SV=1	Ap2m1
KYKASENAI	9	H-2-Kd	SB	16.9	Maxquant	TG	1426400	TG_2a	P84091	342_350	AP-2 complex subunit mu OS=Mus musculus OX=10090 GN=Ap2m1 PE=1 SV=1	Ap2m1
KYKASENAI	9	H-2-Kd	SB	16.9	Maxquant	HG	3150600	HG_1c	P84091	342_350	AP-2 complex subunit mu OS=Mus musculus OX=10090 GN=Ap2m1 PE=1 SV=1	Ap2m1
KYKDIYTEL	9	H-2-Kd	SB	91.85	Maxquant	TG	15219000	TG_2c	P97434	938_946	Myosin phosphatase Rho-interacting protein OS=Mus musculus OX=10090 GN=Mprip PE=1 SV=2	Mprip
KYKDIYTEL	9	H-2-Kd	SB	91.85	Maxquant	HG	15383000	HG_2b	P97434	938_946	Myosin phosphatase Rho-interacting protein OS=Mus musculus OX=10090 GN=Mprip PE=1 SV=2	Mprip
KYKDIYTEL	9	H-2-Kd	SB	91.85	PD Sequest	TG	520000000	TG_1a	P97434	938_946	Myosin phosphatase Rho-interacting protein OS=Mus musculus OX=10090 GN=Mprip PE=1 SV=2	Mprip
KYKDIYTEL	9	H-2-Kd	SB	91.85	Maxquant	Control	42460000	Control_1_1b	P97434	938_946	Myosin phosphatase Rho-interacting protein OS=Mus musculus OX=10090 GN=Mprip PE=1 SV=2	Mprip
KYKDIYTEL	9	H-2-Kd	SB	91.85	PD Mascot	HG	21000000	HG_2a	P97434	938_946	Myosin phosphatase Rho-interacting protein OS=Mus musculus OX=10090 GN=Mprip PE=1 SV=2	Mprip
KYKDIYTEL	9	H-2-Kd	SB	91.85	Maxquant	HG	5334000	HG_1a	P97434	938_946	Myosin phosphatase Rho-interacting protein OS=Mus musculus OX=10090 GN=Mprip PE=1 SV=2	Mprip
KYKDIYTEL	9	H-2-Kd	SB	91.85	PD Sequest	TG	1700000	TG_2a	P97434	938_946	Myosin phosphatase Rho-interacting protein OS=Mus musculus OX=10090 GN=Mprip PE=1 SV=2	Mprip
KYKDIYTEL	9	H-2-Kd	SB	91.85	Maxquant	TG	234490000	TG_1a	P97434	938_946	Myosin phosphatase Rho-interacting protein OS=Mus musculus OX=10090 GN=Mprip PE=1 SV=2	Mprip
KYKDIYTEL	9	H-2-Kd	SB	91.85	PD Sequest	HG	21000000	HG_2a	P97434	938_946	Myosin phosphatase Rho-interacting protein OS=Mus musculus OX=10090 GN=Mprip PE=1 SV=2	Mprip
KYKDIYTEL	9	H-2-Kd	SB	91.85	Maxquant	HG	3119700	HG_1b	P97434	938_946	Myosin phosphatase Rho-interacting protein OS=Mus musculus OX=10090 GN=Mprip PE=1 SV=2	Mprip
KYKDIYTEL	9	H-2-Kd	SB	91.85	Maxquant	TG	200960000	TG_1b	P97434	938_946	Myosin phosphatase Rho-interacting protein OS=Mus musculus OX=10090 GN=Mprip PE=1 SV=2	Mprip
KYKDIYTEL	9	H-2-Kd	SB	91.85	Maxquant	Control	48459000	Control_1_1c	P97434	938_946	Myosin phosphatase Rho-interacting protein OS=Mus musculus OX=10090 GN=Mprip PE=1 SV=2	Mprip
KYKDIYTEL	9	H-2-Kd	SB	91.85	PD Mascot	TG	530000000	TG_1b	P97434	938_946	Myosin phosphatase Rho-interacting protein OS=Mus musculus OX=10090 GN=Mprip PE=1 SV=2	Mprip
KYKDIYTEL	9	H-2-Kd	SB	91.85	PD Sequest	TG	530000000	TG_1b	P97434	938_946	Myosin phosphatase Rho-interacting protein OS=Mus musculus OX=10090 GN=Mprip PE=1 SV=2	Mprip
KYKDIYTEL	9	H-2-Kd	SB	91.85	Maxquant	TG	4167300	TG_2a	P97434	938_946	Myosin phosphatase Rho-interacting protein OS=Mus musculus OX=10090 GN=Mprip PE=1 SV=2	Mprip
KYKDIYTEL	9	H-2-Kd	SB	91.85	PD Sequest	HG	29000000	HG_2c	P97434	938_946	Myosin phosphatase Rho-interacting protein OS=Mus musculus OX=10090 GN=Mprip PE=1 SV=2	Mprip
KYKDIYTEL	9	H-2-Kd	SB	91.85	Maxquant	HG	11877000	HG_2c	P97434	938_946	Myosin phosphatase Rho-interacting protein OS=Mus musculus OX=10090 GN=Mprip PE=1 SV=2	Mprip
KYKDIYTEL	9	H-2-Kd	SB	91.85	Maxquant	TG	201930000	TG_1c	P97434	938_946	Myosin phosphatase Rho-interacting protein OS=Mus musculus OX=10090 GN=Mprip PE=1 SV=2	Mprip
KYKDIYTEL	9	H-2-Kd	SB	91.85	Maxquant	HG	3909300	HG_1c	P97434	938_946	Myosin phosphatase Rho-interacting protein OS=Mus musculus OX=10090 GN=Mprip PE=1 SV=2	Mprip
KYKDIYTEL	9	H-2-Kd	SB	91.85	Maxquant	HG	9960500	HG_2a	P97434	938_946	Myosin phosphatase Rho-interacting protein OS=Mus musculus OX=10090 GN=Mprip PE=1 SV=2	Mprip
KYKDIYTEL	9	H-2-Kd	SB	91.85	Maxquant	Control	53702000	Control_1_1a	P97434	938_946	Myosin phosphatase Rho-interacting protein OS=Mus musculus OX=10090 GN=Mprip PE=1 SV=2	Mprip
KYKDIYTEL	9	H-2-Kd	SB	91.85	PD Sequest	Control	130000000	Control_1_1b	P97434	938_946	Myosin phosphatase Rho-interacting protein OS=Mus musculus OX=10090 GN=Mprip PE=1 SV=2	Mprip
KYLENPNAL	9	H-2-Kd	SB	50.95	Maxquant	HG	2037500	HG_1a	Q8BX02	594_602	KN motif and ankyrin repeat domain-containing protein 2 OS=Mus musculus OX=10090 GN=Kank2 PE=1 SV=1	Kank2
KYLENPNAL	9	H-2-Kd	SB	50.95	Maxquant	HG	3377900	HG_2c	Q8BX02	594_602	KN motif and ankyrin repeat domain-containing protein 2 OS=Mus musculus OX=10090 GN=Kank2 PE=1 SV=1	Kank2
KYLENPNAL	9	H-2-Db	WB	4658.3	Maxquant	Control	7187400	Control_1_1c	Q8BX02	594_602	KN motif and ankyrin repeat domain-containing protein 2 OS=Mus musculus OX=10090 GN=Kank2 PE=1 SV=1	Kank2
KYLENPNAL	9	H-2-Kd	SB	50.95	Maxquant	TG	1912200	TG_2a	Q8BX02	594_602	KN motif and ankyrin repeat domain-containing protein 2 OS=Mus musculus OX=10090 GN=Kank2 PE=1 SV=1	Kank2
KYLENPNAL	9	H-2-Db	WB	4658.3	Maxquant	TG	1912200	TG_2a	Q8BX02	594_602	KN motif and ankyrin repeat domain-containing protein 2 OS=Mus musculus OX=10090 GN=Kank2 PE=1 SV=1	Kank2
KYLENPNAL	9	H-2-Db	WB	4658.3	PD Mascot	HG	8100000	HG_2a	Q8BX02	594_602	KN motif and ankyrin repeat domain-containing protein 2 OS=Mus musculus OX=10090 GN=Kank2 PE=1 SV=1	Kank2
KYLENPNAL	9	H-2-Kd	SB	50.95	Maxquant	TG	5559100	TG_1a	Q8BX02	594_602	KN motif and ankyrin repeat domain-containing protein 2 OS=Mus musculus OX=10090 GN=Kank2 PE=1 SV=1	Kank2
KYLENPNAL	9	H-2-Kd	SB	50.95	Maxquant	TG	1899300	TG_2c	Q8BX02	594_602	KN motif and ankyrin repeat domain-containing protein 2 OS=Mus musculus OX=10090 GN=Kank2 PE=1 SV=1	Kank2
KYLENPNAL	9	H-2-Db	WB	4658.3	PD Mascot	TG	13000000	TG_1a	Q8BX02	594_602	KN motif and ankyrin repeat domain-containing protein 2 OS=Mus musculus OX=10090 GN=Kank2 PE=1 SV=1	Kank2
KYLENPNAL	9	H-2-Db	WB	4658.3	PD Mascot	HG	7600000	HG_2c	Q8BX02	594_602	KN motif and ankyrin repeat domain-containing protein 2 OS=Mus musculus OX=10090 GN=Kank2 PE=1 SV=1	Kank2
KYLENPNAL	9	H-2-Kd	SB	50.95	Maxquant	HG	3335300	HG_2a	Q8BX02	594_602	KN motif and ankyrin repeat domain-containing protein 2 OS=Mus musculus OX=10090 GN=Kank2 PE=1 SV=1	Kank2
KYLENPNAL	9	H-2-Db	WB	4658.3	Maxquant	TG	1899300	TG_2c	Q8BX02	594_602	KN motif and ankyrin repeat domain-containing protein 2 OS=Mus musculus OX=10090 GN=Kank2 PE=1 SV=1	Kank2
KYLENPNAL	9	H-2-Kd	SB	50.95	PD Mascot	HG	8100000	HG_2a	Q8BX02	594_602	KN motif and ankyrin repeat domain-containing protein 2 OS=Mus musculus OX=10090 GN=Kank2 PE=1 SV=1	Kank2
KYLENPNAL	9	H-2-Db	WB	4658.3	Maxquant	TG	5770100	TG_1c	Q8BX02	594_602	KN motif and ankyrin repeat domain-containing protein 2 OS=Mus musculus OX=10090 GN=Kank2 PE=1 SV=1	Kank2
KYLENPNAL	9	H-2-Kd	SB	50.95	Maxquant	HG	1504000	HG_1b	Q8BX02	594_602	KN motif and ankyrin repeat domain-containing protein 2 OS=Mus musculus OX=10090 GN=Kank2 PE=1 SV=1	Kank2
KYLENPNAL	9	H-2-Kd	SB	50.95	Maxquant	HG	4940200	HG_2b	Q8BX02	594_602	KN motif and ankyrin repeat domain-containing protein 2 OS=Mus musculus OX=10090 GN=Kank2 PE=1 SV=1	Kank2
KYLENPNAL	9	H-2-Db	WB	4658.3	Maxquant	HG	2037500	HG_1a	Q8BX02	594_602	KN motif and ankyrin repeat domain-containing protein 2 OS=Mus musculus OX=10090 GN=Kank2 PE=1 SV=1	Kank2
KYLENPNAL	9	H-2-Kd	SB	50.95	PD Mascot	HG	7600000	HG_2c	Q8BX02	594_602	KN motif and ankyrin repeat domain-containing protein 2 OS=Mus musculus OX=10090 GN=Kank2 PE=1 SV=1	Kank2
KYLENPNAL	9	H-2-Db	WB	4658.3	Maxquant	HG	4940200	HG_2b	Q8BX02	594_602	KN motif and ankyrin repeat domain-containing protein 2 OS=Mus musculus OX=10090 GN=Kank2 PE=1 SV=1	Kank2
KYLENPNAL	9	H-2-Kd	SB	50.95	Maxquant	TG	6668700	TG_1b	Q8BX02	594_602	KN motif and ankyrin repeat domain-containing protein 2 OS=Mus musculus OX=10090 GN=Kank2 PE=1 SV=1	Kank2
KYLENPNAL	9	H-2-Db	WB	4658.3	Maxquant	TG	2480100	TG_2b	Q8BX02	594_602	KN motif and ankyrin repeat domain-containing protein 2 OS=Mus musculus OX=10090 GN=Kank2 PE=1 SV=1	Kank2
KYLENPNAL	9	H-2-Kd	SB	50.95	PD Mascot	TG	13000000	TG_1b	Q8BX02	594_602	KN motif and ankyrin repeat domain-containing protein 2 OS=Mus musculus OX=10090 GN=Kank2 PE=1 SV=1	Kank2
KYLENPNAL	9	H-2-Db	WB	4658.3	PD Mascot	TG	13000000	TG_1b	Q8BX02	594_602	KN motif and ankyrin repeat domain-containing protein 2 OS=Mus musculus OX=10090 GN=Kank2 PE=1 SV=1	Kank2
KYLENPNAL	9	H-2-Kd	SB	50.95	Maxquant	Control	7565300	Control_1_1b	Q8BX02	594_602	KN motif and ankyrin repeat domain-containing protein 2 OS=Mus musculus OX=10090 GN=Kank2 PE=1 SV=1	Kank2
KYLENPNAL	9	H-2-Db	WB	4658.3	Maxquant	Control	7565300	Control_1_1b	Q8BX02	594_602	KN motif and ankyrin repeat domain-containing protein 2 OS=Mus musculus OX=10090 GN=Kank2 PE=1 SV=1	Kank2
KYLENPNAL	9	H-2-Kd	SB	50.95	Maxquant	Control	7187400	Control_1_1c	Q8BX02	594_602	KN motif and ankyrin repeat domain-containing protein 2 OS=Mus musculus OX=10090 GN=Kank2 PE=1 SV=1	Kank2
KYLENPNAL	9	H-2-Kd	SB	50.95	PD Mascot	Control	10000000	Control_1_1b	Q8BX02	594_602	KN motif and ankyrin repeat domain-containing protein 2 OS=Mus musculus OX=10090 GN=Kank2 PE=1 SV=1	Kank2
KYLENPNAL	9	H-2-Kd	SB	50.95	Maxquant	TG	5770100	TG_1c	Q8BX02	594_602	KN motif and ankyrin repeat domain-containing protein 2 OS=Mus musculus OX=10090 GN=Kank2 PE=1 SV=1	Kank2
KYLENPNAL	9	H-2-Db	WB	4658.3	Maxquant	HG	3377900	HG_2c	Q8BX02	594_602	KN motif and ankyrin repeat domain-containing protein 2 OS=Mus musculus OX=10090 GN=Kank2 PE=1 SV=1	Kank2
KYLENPNAL	9	H-2-Db	WB	4658.3	Maxquant	TG	6668700	TG_1b	Q8BX02	594_602	KN motif and ankyrin repeat domain-containing protein 2 OS=Mus musculus OX=10090 GN=Kank2 PE=1 SV=1	Kank2
KYLENPNAL	9	H-2-Db	WB	4658.3	Maxquant	HG	1504000	HG_1b	Q8BX02	594_602	KN motif and ankyrin repeat domain-containing protein 2 OS=Mus musculus OX=10090 GN=Kank2 PE=1 SV=1	Kank2
KYLENPNAL	9	H-2-Db	WB	4658.3	Maxquant	TG	5559100	TG_1a	Q8BX02	594_602	KN motif and ankyrin repeat domain-containing protein 2 OS=Mus musculus OX=10090 GN=Kank2 PE=1 SV=1	Kank2
KYLENPNAL	9	H-2-Db	WB	4658.3	Maxquant	Control	6601000	Control_1_1a	Q8BX02	594_602	KN motif and ankyrin repeat domain-containing protein 2 OS=Mus musculus OX=10090 GN=Kank2 PE=1 SV=1	Kank2
KYLENPNAL	9	H-2-Kd	SB	50.95	PD Mascot	HG	8900000	HG_2b	Q8BX02	594_602	KN motif and ankyrin repeat domain-containing protein 2 OS=Mus musculus OX=10090 GN=Kank2 PE=1 SV=1	Kank2
KYLENPNAL	9	H-2-Db	WB	4658.3	PD Mascot	HG	8900000	HG_2b	Q8BX02	594_602	KN motif and ankyrin repeat domain-containing protein 2 OS=Mus musculus OX=10090 GN=Kank2 PE=1 SV=1	Kank2
KYLENPNAL	9	H-2-Db	WB	4658.3	Maxquant	HG	2299000	HG_1c	Q8BX02	594_602	KN motif and ankyrin repeat domain-containing protein 2 OS=Mus musculus OX=10090 GN=Kank2 PE=1 SV=1	Kank2
KYLENPNAL	9	H-2-Kd	SB	50.95	Maxquant	Control	6601000	Control_1_1a	Q8BX02	594_602	KN motif and ankyrin repeat domain-containing protein 2 OS=Mus musculus OX=10090 GN=Kank2 PE=1 SV=1	Kank2
KYLENPNAL	9	H-2-Db	WB	4658.3	Maxquant	HG	3335300	HG_2a	Q8BX02	594_602	KN motif and ankyrin repeat domain-containing protein 2 OS=Mus musculus OX=10090 GN=Kank2 PE=1 SV=1	Kank2
KYLENPNAL	9	H-2-Kd	SB	50.95	Maxquant	TG	2480100	TG_2b	Q8BX02	594_602	KN motif and ankyrin repeat domain-containing protein 2 OS=Mus musculus OX=10090 GN=Kank2 PE=1 SV=1	Kank2
KYLENPNAL	9	H-2-Db	WB	4658.3	PD Mascot	Control	10000000	Control_1_1b	Q8BX02	594_602	KN motif and ankyrin repeat domain-containing protein 2 OS=Mus musculus OX=10090 GN=Kank2 PE=1 SV=1	Kank2
KYLENPNAL	9	H-2-Db	WB	4658.3	PD Mascot	Control	13000000	Control_1_1a	Q8BX02	594_602	KN motif and ankyrin repeat domain-containing protein 2 OS=Mus musculus OX=10090 GN=Kank2 PE=1 SV=1	Kank2
KYLENPNAL	9	H-2-Kd	SB	50.95	PD Mascot	TG	13000000	TG_1a	Q8BX02	594_602	KN motif and ankyrin repeat domain-containing protein 2 OS=Mus musculus OX=10090 GN=Kank2 PE=1 SV=1	Kank2
KYLENPNAL	9	H-2-Kd	SB	50.95	Maxquant	HG	2299000	HG_1c	Q8BX02	594_602	KN motif and ankyrin repeat domain-containing protein 2 OS=Mus musculus OX=10090 GN=Kank2 PE=1 SV=1	Kank2
KYLENPNAL	9	H-2-Kd	SB	50.95	PD Mascot	Control	13000000	Control_1_1a	Q8BX02	594_602	KN motif and ankyrin repeat domain-containing protein 2 OS=Mus musculus OX=10090 GN=Kank2 PE=1 SV=1	Kank2
KYLGINSDGL	10	H-2-Kd	SB	540.45	PD Mascot	TG	9100000	TG_1a	P97376	114_123	Protein FRG1 OS=Mus musculus OX=10090 GN=Frg1 PE=1 SV=2	Frg1
KYLGINSDGL	10	H-2-Kd	SB	540.45	PD Mascot	HG	3200000	HG_2c	P97376	114_123	Protein FRG1 OS=Mus musculus OX=10090 GN=Frg1 PE=1 SV=2	Frg1
KYLGINSDGL	10	H-2-Kd	SB	540.45	PD Mascot	Control	3700000	Control_1_1c	P97376	114_123	Protein FRG1 OS=Mus musculus OX=10090 GN=Frg1 PE=1 SV=2	Frg1
KYLGINSDGL	10	H-2-Kd	SB	540.45	PD Mascot	TG	8800000	TG_1b	P97376	114_123	Protein FRG1 OS=Mus musculus OX=10090 GN=Frg1 PE=1 SV=2	Frg1
KYLGINSDGL	10	H-2-Kd	SB	540.45	PD Mascot	Control	3600000	Control_1_1a	P97376	114_123	Protein FRG1 OS=Mus musculus OX=10090 GN=Frg1 PE=1 SV=2	Frg1
KYLGINSDGL	10	H-2-Kd	SB	540.45	PD Mascot	HG	4000000	HG_2b	P97376	114_123	Protein FRG1 OS=Mus musculus OX=10090 GN=Frg1 PE=1 SV=2	Frg1
KYLGINSDGL	10	H-2-Kd	SB	540.45	PD Mascot	Control	4000000	Control_1_1b	P97376	114_123	Protein FRG1 OS=Mus musculus OX=10090 GN=Frg1 PE=1 SV=2	Frg1
KYLGQLTSI	9	H-2-Kd	SB	10.76	Maxquant	TG	1785300	TG_2c	Q8K2Y9	67_75	Cerebral cavernous malformations protein 2 homolog OS=Mus musculus OX=10090 GN=Ccm2 PE=1 SV=1	Ccm2
KYLGQLTSI	9	H-2-Kd	SB	10.76	Maxquant	Control	2763300	Control_1_1c	Q8K2Y9	67_75	Cerebral cavernous malformations protein 2 homolog OS=Mus musculus OX=10090 GN=Ccm2 PE=1 SV=1	Ccm2
KYLGQLTSI	9	H-2-Kd	SB	10.76	Maxquant	HG	3120700	HG_2b	Q8K2Y9	67_75	Cerebral cavernous malformations protein 2 homolog OS=Mus musculus OX=10090 GN=Ccm2 PE=1 SV=1	Ccm2
KYLGQLTSI	9	H-2-Kd	SB	10.76	Maxquant	TG	10893000	TG_1c	Q8K2Y9	67_75	Cerebral cavernous malformations protein 2 homolog OS=Mus musculus OX=10090 GN=Ccm2 PE=1 SV=1	Ccm2
KYLGQLTSI	9	H-2-Kd	SB	10.76	Maxquant	Control	2754100	Control_1_1a	Q8K2Y9	67_75	Cerebral cavernous malformations protein 2 homolog OS=Mus musculus OX=10090 GN=Ccm2 PE=1 SV=1	Ccm2
KYLGQLTSI	9	H-2-Kd	SB	10.76	Maxquant	TG	2326200	TG_2b	Q8K2Y9	67_75	Cerebral cavernous malformations protein 2 homolog OS=Mus musculus OX=10090 GN=Ccm2 PE=1 SV=1	Ccm2
KYLGQLTSI	9	H-2-Kd	SB	10.76	Maxquant	HG	3018200	HG_2a	Q8K2Y9	67_75	Cerebral cavernous malformations protein 2 homolog OS=Mus musculus OX=10090 GN=Ccm2 PE=1 SV=1	Ccm2
KYLGQLTSI	9	H-2-Kd	SB	10.76	Maxquant	TG	10648000	TG_1a	Q8K2Y9	67_75	Cerebral cavernous malformations protein 2 homolog OS=Mus musculus OX=10090 GN=Ccm2 PE=1 SV=1	Ccm2
KYLGQLTSI	9	H-2-Kd	SB	10.76	Maxquant	TG	1908000	TG_2a	Q8K2Y9	67_75	Cerebral cavernous malformations protein 2 homolog OS=Mus musculus OX=10090 GN=Ccm2 PE=1 SV=1	Ccm2
KYLGQLTSI	9	H-2-Kd	SB	10.76	Maxquant	Control	4012600	Control_1_1b	Q8K2Y9	67_75	Cerebral cavernous malformations protein 2 homolog OS=Mus musculus OX=10090 GN=Ccm2 PE=1 SV=1	Ccm2
KYLGQLTSI	9	H-2-Kd	SB	10.76	Maxquant	TG	14735000	TG_1b	Q8K2Y9	67_75	Cerebral cavernous malformations protein 2 homolog OS=Mus musculus OX=10090 GN=Ccm2 PE=1 SV=1	Ccm2
KYLGQLTSI	9	H-2-Kd	SB	10.76	Maxquant	HG	2892100	HG_2c	Q8K2Y9	67_75	Cerebral cavernous malformations protein 2 homolog OS=Mus musculus OX=10090 GN=Ccm2 PE=1 SV=1	Ccm2
KYLNSVQYI	9	H-2-Kd	SB	12.57	PD Sequest	TG	3700000	TG_2c	Q9ERD6	257_265	Ras-specific guanine nucleotide-releasing factor RalGPS2 OS=Mus musculus OX=10090 GN=Ralgps2 PE=1 SV=2	Ralgps2
KYLNSVQYI	9	H-2-Kd	SB	12.57	Maxquant	HG	3406100	HG_2c	Q9ERD6	257_265	Ras-specific guanine nucleotide-releasing factor RalGPS2 OS=Mus musculus OX=10090 GN=Ralgps2 PE=1 SV=2	Ralgps2
KYLNSVQYI	9	H-2-Kd	SB	12.57	Maxquant	Control	1195800	Control_1_1a	Q9ERD6	257_265	Ras-specific guanine nucleotide-releasing factor RalGPS2 OS=Mus musculus OX=10090 GN=Ralgps2 PE=1 SV=2	Ralgps2
KYLNSVQYI	9	H-2-Kd	SB	12.57	Maxquant	TG	11286000	TG_1b	Q9ERD6	257_265	Ras-specific guanine nucleotide-releasing factor RalGPS2 OS=Mus musculus OX=10090 GN=Ralgps2 PE=1 SV=2	Ralgps2
KYLNSVQYI	9	H-2-Kd	SB	12.57	PD Mascot	TG	25000000	TG_1b	Q9ERD6	257_265	Ras-specific guanine nucleotide-releasing factor RalGPS2 OS=Mus musculus OX=10090 GN=Ralgps2 PE=1 SV=2	Ralgps2
KYLNSVQYI	9	H-2-Kd	SB	12.57	Maxquant	HG	2767400	HG_2b	Q9ERD6	257_265	Ras-specific guanine nucleotide-releasing factor RalGPS2 OS=Mus musculus OX=10090 GN=Ralgps2 PE=1 SV=2	Ralgps2
KYLNSVQYI	9	H-2-Kd	SB	12.57	Maxquant	Control	1481400	Control_1_1c	Q9ERD6	257_265	Ras-specific guanine nucleotide-releasing factor RalGPS2 OS=Mus musculus OX=10090 GN=Ralgps2 PE=1 SV=2	Ralgps2
KYLNSVQYI	9	H-2-Kd	SB	12.57	Maxquant	TG	11477000	TG_1c	Q9ERD6	257_265	Ras-specific guanine nucleotide-releasing factor RalGPS2 OS=Mus musculus OX=10090 GN=Ralgps2 PE=1 SV=2	Ralgps2
KYLNSVQYI	9	H-2-Kd	SB	12.57	PD Sequest	TG	25000000	TG_1b	Q9ERD6	257_265	Ras-specific guanine nucleotide-releasing factor RalGPS2 OS=Mus musculus OX=10090 GN=Ralgps2 PE=1 SV=2	Ralgps2
KYLNSVQYI	9	H-2-Kd	SB	12.57	PD Sequest	TG	3500000	TG_2b	Q9ERD6	257_265	Ras-specific guanine nucleotide-releasing factor RalGPS2 OS=Mus musculus OX=10090 GN=Ralgps2 PE=1 SV=2	Ralgps2
KYLNSVQYI	9	H-2-Kd	SB	12.57	Maxquant	TG	11252000	TG_1a	Q9ERD6	257_265	Ras-specific guanine nucleotide-releasing factor RalGPS2 OS=Mus musculus OX=10090 GN=Ralgps2 PE=1 SV=2	Ralgps2
KYLNSVQYI	9	H-2-Kd	SB	12.57	PD Sequest	TG	2800000	TG_2a	Q9ERD6	257_265	Ras-specific guanine nucleotide-releasing factor RalGPS2 OS=Mus musculus OX=10090 GN=Ralgps2 PE=1 SV=2	Ralgps2
KYLNSVQYI	9	H-2-Kd	SB	12.57	PD Mascot	TG	3500000	TG_2b	Q9ERD6	257_265	Ras-specific guanine nucleotide-releasing factor RalGPS2 OS=Mus musculus OX=10090 GN=Ralgps2 PE=1 SV=2	Ralgps2
KYLNSVQYI	9	H-2-Kd	SB	12.57	PD Mascot	TG	3700000	TG_2c	Q9ERD6	257_265	Ras-specific guanine nucleotide-releasing factor RalGPS2 OS=Mus musculus OX=10090 GN=Ralgps2 PE=1 SV=2	Ralgps2
KYLNSVQYI	9	H-2-Kd	SB	12.57	Maxquant	HG	2617200	HG_2a	Q9ERD6	257_265	Ras-specific guanine nucleotide-releasing factor RalGPS2 OS=Mus musculus OX=10090 GN=Ralgps2 PE=1 SV=2	Ralgps2
KYLNSVQYI	9	H-2-Kd	SB	12.57	Maxquant	Control	1425100	Control_1_1b	Q9ERD6	257_265	Ras-specific guanine nucleotide-releasing factor RalGPS2 OS=Mus musculus OX=10090 GN=Ralgps2 PE=1 SV=2	Ralgps2
KYLSVQGQL	9	H-2-Kd	SB	31.47	PD Sequest	TG	73000000	TG_2b	Q791T5	360_368	Mitochondrial carrier homolog 1 OS=Mus musculus OX=10090 GN=Mtch1 PE=1 SV=1	Mtch1
KYLSVQGQL	9	H-2-Kd	SB	31.47	PD Mascot	HG	21000000	HG_1b	Q791T5	360_368	Mitochondrial carrier homolog 1 OS=Mus musculus OX=10090 GN=Mtch1 PE=1 SV=1	Mtch1
KYLSVQGQL	9	H-2-Kd	SB	31.47	PD Sequest	HG	120000000	HG_2b	Q791T5	360_368	Mitochondrial carrier homolog 1 OS=Mus musculus OX=10090 GN=Mtch1 PE=1 SV=1	Mtch1
KYLSVQGQL	9	H-2-Kd	SB	31.47	Maxquant	Control	3029600	Control_1_2b	Q791T5	360_368	Mitochondrial carrier homolog 1 OS=Mus musculus OX=10090 GN=Mtch1 PE=1 SV=1	Mtch1
KYLSVQGQL	9	H-2-Kd	SB	31.47	Maxquant	Control	74360000	Control_1_1c	Q791T5	360_368	Mitochondrial carrier homolog 1 OS=Mus musculus OX=10090 GN=Mtch1 PE=1 SV=1	Mtch1
KYLSVQGQL	9	H-2-Kd	SB	31.47	PD Sequest	HG	21000000	HG_1b	Q791T5	360_368	Mitochondrial carrier homolog 1 OS=Mus musculus OX=10090 GN=Mtch1 PE=1 SV=1	Mtch1
KYLSVQGQL	9	H-2-Kd	SB	31.47	PD Mascot	Control	160000000	Control_1_1b	Q791T5	360_368	Mitochondrial carrier homolog 1 OS=Mus musculus OX=10090 GN=Mtch1 PE=1 SV=1	Mtch1
KYLSVQGQL	9	H-2-Kd	SB	31.47	Maxquant	HG	55146000	HG_2b	Q791T5	360_368	Mitochondrial carrier homolog 1 OS=Mus musculus OX=10090 GN=Mtch1 PE=1 SV=1	Mtch1
KYLSVQGQL	9	H-2-Kd	SB	31.47	Maxquant	TG	37021000	TG_2a	Q791T5	360_368	Mitochondrial carrier homolog 1 OS=Mus musculus OX=10090 GN=Mtch1 PE=1 SV=1	Mtch1
KYLSVQGQL	9	H-2-Kd	SB	31.47	PD Mascot	HG	120000000	HG_2a	Q791T5	360_368	Mitochondrial carrier homolog 1 OS=Mus musculus OX=10090 GN=Mtch1 PE=1 SV=1	Mtch1
KYLSVQGQL	9	H-2-Kd	SB	31.47	Maxquant	Control	60744000	Control_1_1b	Q791T5	360_368	Mitochondrial carrier homolog 1 OS=Mus musculus OX=10090 GN=Mtch1 PE=1 SV=1	Mtch1
KYLSVQGQL	9	H-2-Kd	SB	31.47	PD Sequest	Control	160000000	Control_1_1c	Q791T5	360_368	Mitochondrial carrier homolog 1 OS=Mus musculus OX=10090 GN=Mtch1 PE=1 SV=1	Mtch1
KYLSVQGQL	9	H-2-Kd	SB	31.47	Maxquant	TG	33208000	TG_2c	Q791T5	360_368	Mitochondrial carrier homolog 1 OS=Mus musculus OX=10090 GN=Mtch1 PE=1 SV=1	Mtch1
KYLSVQGQL	9	H-2-Kd	SB	31.47	Maxquant	HG	53572000	HG_2a	Q791T5	360_368	Mitochondrial carrier homolog 1 OS=Mus musculus OX=10090 GN=Mtch1 PE=1 SV=1	Mtch1
KYLSVQGQL	9	H-2-Kd	SB	31.47	Maxquant	TG	36724000	TG_2b	Q791T5	360_368	Mitochondrial carrier homolog 1 OS=Mus musculus OX=10090 GN=Mtch1 PE=1 SV=1	Mtch1
KYLSVQGQL	9	H-2-Kd	SB	31.47	PD Mascot	Control	7700000	Control_1_2c	Q791T5	360_368	Mitochondrial carrier homolog 1 OS=Mus musculus OX=10090 GN=Mtch1 PE=1 SV=1	Mtch1
KYLSVQGQL	9	H-2-Kd	SB	31.47	PD Mascot	TG	76000000	TG_2a	Q791T5	360_368	Mitochondrial carrier homolog 1 OS=Mus musculus OX=10090 GN=Mtch1 PE=1 SV=1	Mtch1
KYLSVQGQL	9	H-2-Kd	SB	31.47	PD Sequest	HG	19000000	HG_1c	Q791T5	360_368	Mitochondrial carrier homolog 1 OS=Mus musculus OX=10090 GN=Mtch1 PE=1 SV=1	Mtch1
KYLSVQGQL	9	H-2-Kd	SB	31.47	Maxquant	Control	75499000	Control_1_1a	Q791T5	360_368	Mitochondrial carrier homolog 1 OS=Mus musculus OX=10090 GN=Mtch1 PE=1 SV=1	Mtch1
KYLSVQGQL	9	H-2-Kd	SB	31.47	PD Sequest	TG	330000000	TG_1a	Q791T5	360_368	Mitochondrial carrier homolog 1 OS=Mus musculus OX=10090 GN=Mtch1 PE=1 SV=1	Mtch1
KYLSVQGQL	9	H-2-Kd	SB	31.47	Maxquant	Control	2443500	Control_1_2a	Q791T5	360_368	Mitochondrial carrier homolog 1 OS=Mus musculus OX=10090 GN=Mtch1 PE=1 SV=1	Mtch1
KYLSVQGQL	9	H-2-Kd	SB	31.47	Maxquant	TG	132950000	TG_1c	Q791T5	360_368	Mitochondrial carrier homolog 1 OS=Mus musculus OX=10090 GN=Mtch1 PE=1 SV=1	Mtch1
KYLSVQGQL	9	H-2-Kd	SB	31.47	PD Mascot	TG	330000000	TG_1a	Q791T5	360_368	Mitochondrial carrier homolog 1 OS=Mus musculus OX=10090 GN=Mtch1 PE=1 SV=1	Mtch1
KYLSVQGQL	9	H-2-Kd	SB	31.47	PD Sequest	TG	76000000	TG_2a	Q791T5	360_368	Mitochondrial carrier homolog 1 OS=Mus musculus OX=10090 GN=Mtch1 PE=1 SV=1	Mtch1
KYLSVQGQL	9	H-2-Kd	SB	31.47	Maxquant	HG	8466600	HG_1a	Q791T5	360_368	Mitochondrial carrier homolog 1 OS=Mus musculus OX=10090 GN=Mtch1 PE=1 SV=1	Mtch1
KYLSVQGQL	9	H-2-Kd	SB	31.47	PD Sequest	TG	340000000	TG_1b	Q791T5	360_368	Mitochondrial carrier homolog 1 OS=Mus musculus OX=10090 GN=Mtch1 PE=1 SV=1	Mtch1
KYLSVQGQL	9	H-2-Kd	SB	31.47	Maxquant	HG	11250000	HG_1b	Q791T5	360_368	Mitochondrial carrier homolog 1 OS=Mus musculus OX=10090 GN=Mtch1 PE=1 SV=1	Mtch1
KYLSVQGQL	9	H-2-Kd	SB	31.47	Maxquant	Control	3598800	Control_1_2c	Q791T5	360_368	Mitochondrial carrier homolog 1 OS=Mus musculus OX=10090 GN=Mtch1 PE=1 SV=1	Mtch1
KYLSVQGQL	9	H-2-Kd	SB	31.47	PD Sequest	HG	120000000	HG_2c	Q791T5	360_368	Mitochondrial carrier homolog 1 OS=Mus musculus OX=10090 GN=Mtch1 PE=1 SV=1	Mtch1
KYLSVQGQL	9	H-2-Kd	SB	31.47	PD Mascot	TG	73000000	TG_2b	Q791T5	360_368	Mitochondrial carrier homolog 1 OS=Mus musculus OX=10090 GN=Mtch1 PE=1 SV=1	Mtch1
KYLSVQGQL	9	H-2-Kd	SB	31.47	Maxquant	TG	138170000	TG_1b	Q791T5	360_368	Mitochondrial carrier homolog 1 OS=Mus musculus OX=10090 GN=Mtch1 PE=1 SV=1	Mtch1
KYLSVQGQL	9	H-2-Kd	SB	31.47	PD Sequest	Control	5100000	Control_1_2b	Q791T5	360_368	Mitochondrial carrier homolog 1 OS=Mus musculus OX=10090 GN=Mtch1 PE=1 SV=1	Mtch1
KYLSVQGQL	9	H-2-Kd	SB	31.47	PD Mascot	TG	340000000	TG_1b	Q791T5	360_368	Mitochondrial carrier homolog 1 OS=Mus musculus OX=10090 GN=Mtch1 PE=1 SV=1	Mtch1
KYLSVQGQL	9	H-2-Kd	SB	31.47	PD Mascot	HG	120000000	HG_2b	Q791T5	360_368	Mitochondrial carrier homolog 1 OS=Mus musculus OX=10090 GN=Mtch1 PE=1 SV=1	Mtch1
KYLSVQGQL	9	H-2-Kd	SB	31.47	PD Mascot	Control	160000000	Control_1_1c	Q791T5	360_368	Mitochondrial carrier homolog 1 OS=Mus musculus OX=10090 GN=Mtch1 PE=1 SV=1	Mtch1
KYLSVQGQL	9	H-2-Kd	SB	31.47	Maxquant	HG	8442700	HG_1c	Q791T5	360_368	Mitochondrial carrier homolog 1 OS=Mus musculus OX=10090 GN=Mtch1 PE=1 SV=1	Mtch1
KYLSVQGQL	9	H-2-Kd	SB	31.47	PD Sequest	Control	7700000	Control_1_2c	Q791T5	360_368	Mitochondrial carrier homolog 1 OS=Mus musculus OX=10090 GN=Mtch1 PE=1 SV=1	Mtch1
KYLSVQGQL	9	H-2-Kd	SB	31.47	PD Sequest	HG	120000000	HG_2a	Q791T5	360_368	Mitochondrial carrier homolog 1 OS=Mus musculus OX=10090 GN=Mtch1 PE=1 SV=1	Mtch1
KYLSVQGQL	9	H-2-Kd	SB	31.47	PD Sequest	TG	75000000	TG_2c	Q791T5	360_368	Mitochondrial carrier homolog 1 OS=Mus musculus OX=10090 GN=Mtch1 PE=1 SV=1	Mtch1
KYLSVQGQL	9	H-2-Kd	SB	31.47	PD Mascot	TG	75000000	TG_2c	Q791T5	360_368	Mitochondrial carrier homolog 1 OS=Mus musculus OX=10090 GN=Mtch1 PE=1 SV=1	Mtch1
KYLSVQGQL	9	H-2-Kd	SB	31.47	Maxquant	TG	176490000	TG_1a	Q791T5	360_368	Mitochondrial carrier homolog 1 OS=Mus musculus OX=10090 GN=Mtch1 PE=1 SV=1	Mtch1
KYLSVQGQL	9	H-2-Kd	SB	31.47	PD Sequest	HG	21000000	HG_1a	Q791T5	360_368	Mitochondrial carrier homolog 1 OS=Mus musculus OX=10090 GN=Mtch1 PE=1 SV=1	Mtch1
KYLSVQGQL	9	H-2-Kd	SB	31.47	PD Sequest	Control	160000000	Control_1_1a	Q791T5	360_368	Mitochondrial carrier homolog 1 OS=Mus musculus OX=10090 GN=Mtch1 PE=1 SV=1	Mtch1
KYLSVQGQL	9	H-2-Kd	SB	31.47	PD Mascot	HG	120000000	HG_2c	Q791T5	360_368	Mitochondrial carrier homolog 1 OS=Mus musculus OX=10090 GN=Mtch1 PE=1 SV=1	Mtch1
KYLSVQGQL	9	H-2-Kd	SB	31.47	Maxquant	HG	48825000	HG_2c	Q791T5	360_368	Mitochondrial carrier homolog 1 OS=Mus musculus OX=10090 GN=Mtch1 PE=1 SV=1	Mtch1
KYLSVQGQL	9	H-2-Kd	SB	31.47	PD Mascot	HG	19000000	HG_1c	Q791T5	360_368	Mitochondrial carrier homolog 1 OS=Mus musculus OX=10090 GN=Mtch1 PE=1 SV=1	Mtch1
KYLSVQGQL	9	H-2-Kd	SB	31.47	PD Sequest	TG	320000000	TG_1c	Q791T5	360_368	Mitochondrial carrier homolog 1 OS=Mus musculus OX=10090 GN=Mtch1 PE=1 SV=1	Mtch1
KYLSVQGQL	9	H-2-Kd	SB	31.47	PD Sequest	Control	160000000	Control_1_1b	Q791T5	360_368	Mitochondrial carrier homolog 1 OS=Mus musculus OX=10090 GN=Mtch1 PE=1 SV=1	Mtch1
KYLSVQGQL	9	H-2-Kd	SB	31.47	PD Mascot	Control	5100000	Control_1_2b	Q791T5	360_368	Mitochondrial carrier homolog 1 OS=Mus musculus OX=10090 GN=Mtch1 PE=1 SV=1	Mtch1
KYLTDQSSL	9	H-2-Kd	SB	21.51	PD Sequest	Control	3700000	Control_1_1c	Q8VBX6	967_975	Multiple PDZ domain protein OS=Mus musculus OX=10090 GN=Mpdz PE=1 SV=2	Mpdz
KYLTDQSSL	9	H-2-Kd	SB	21.51	PD Sequest	TG	2900000	TG_1b	Q8VBX6	967_975	Multiple PDZ domain protein OS=Mus musculus OX=10090 GN=Mpdz PE=1 SV=2	Mpdz
KYLTDQSSL	9	H-2-Kd	SB	21.51	PD Sequest	HG	1300000	HG_1a	Q8VBX6	967_975	Multiple PDZ domain protein OS=Mus musculus OX=10090 GN=Mpdz PE=1 SV=2	Mpdz
KYLTDQSSL	9	H-2-Kd	SB	21.51	PD Sequest	Control	3900000	Control_1_1a	Q8VBX6	967_975	Multiple PDZ domain protein OS=Mus musculus OX=10090 GN=Mpdz PE=1 SV=2	Mpdz
KYMKSQTIL	9	H-2-Kd	SB	10.97	PD Mascot	Control	6100000	Control_1_1a	Q5SVQ0	374_382	Histone acetyltransferase KAT7 OS=Mus musculus OX=10090 GN=Kat7 PE=1 SV=1	Kat7
KYMKSQTIL	9	H-2-Kd	SB	10.97	PD Mascot	TG	4300000	TG_1a	Q5SVQ0	374_382	Histone acetyltransferase KAT7 OS=Mus musculus OX=10090 GN=Kat7 PE=1 SV=1	Kat7
KYMKSQTIL	9	H-2-Kd	SB	10.97	PD Mascot	Control	5900000	Control_1_1c	Q5SVQ0	374_382	Histone acetyltransferase KAT7 OS=Mus musculus OX=10090 GN=Kat7 PE=1 SV=1	Kat7
KYMLTHQEL	9	H-2-Kd	SB	28.28	Maxquant	TG	3697300	TG_1a	E9Q5G3	849_857	Kinesin-like protein KIF23 OS=Mus musculus OX=10090 GN=Kif23 PE=1 SV=1	Kif23
KYMLTHQEL	9	H-2-Kd	SB	28.28	Maxquant	Control	986910	Control_1_1b	E9Q5G3	849_857	Kinesin-like protein KIF23 OS=Mus musculus OX=10090 GN=Kif23 PE=1 SV=1	Kif23
KYMLTHQEL	9	H-2-Kd	SB	28.28	Maxquant	Control	1261800	Control_1_1c	E9Q5G3	849_857	Kinesin-like protein KIF23 OS=Mus musculus OX=10090 GN=Kif23 PE=1 SV=1	Kif23
KYMLTHQEL	9	H-2-Kd	SB	28.28	PD Mascot	TG	14000000	TG_1c	E9Q5G3	849_857	Kinesin-like protein KIF23 OS=Mus musculus OX=10090 GN=Kif23 PE=1 SV=1	Kif23
KYMLTHQEL	9	H-2-Kd	SB	28.28	PD Mascot	HG	3400000	HG_2a	E9Q5G3	849_857	Kinesin-like protein KIF23 OS=Mus musculus OX=10090 GN=Kif23 PE=1 SV=1	Kif23
KYMLTHQEL	9	H-2-Kd	SB	28.28	PD Mascot	TG	11000000	TG_1a	E9Q5G3	849_857	Kinesin-like protein KIF23 OS=Mus musculus OX=10090 GN=Kif23 PE=1 SV=1	Kif23
KYMLTHQEL	9	H-2-Kd	SB	28.28	Maxquant	Control	1099700	Control_1_1a	E9Q5G3	849_857	Kinesin-like protein KIF23 OS=Mus musculus OX=10090 GN=Kif23 PE=1 SV=1	Kif23
KYMLTHQEL	9	H-2-Kd	SB	28.28	PD Mascot	Control	4400000	Control_1_1c	E9Q5G3	849_857	Kinesin-like protein KIF23 OS=Mus musculus OX=10090 GN=Kif23 PE=1 SV=1	Kif23
KYMLTHQEL	9	H-2-Kd	SB	28.28	PD Mascot	TG	5100000	TG_1c	E9Q5G3	849_857	Kinesin-like protein KIF23 OS=Mus musculus OX=10090 GN=Kif23 PE=1 SV=1	Kif23
KYMLTHQEL	9	H-2-Kd	SB	28.28	Maxquant	TG	3630200	TG_1c	E9Q5G3	849_857	Kinesin-like protein KIF23 OS=Mus musculus OX=10090 GN=Kif23 PE=1 SV=1	Kif23
KYMLTHQEL	9	H-2-Kd	SB	28.28	PD Mascot	TG	13000000	TG_1b	E9Q5G3	849_857	Kinesin-like protein KIF23 OS=Mus musculus OX=10090 GN=Kif23 PE=1 SV=1	Kif23
KYNRGLTVV	9	H-2-Kd	SB	24.54	PD Mascot	Control	2200000	Control_1_1c	Q920E5	56_64	Farnesyl pyrophosphate synthase OS=Mus musculus OX=10090 GN=Fdps PE=1 SV=1	Fdps
KYNRGLTVV	9	H-2-Kd	SB	24.54	Maxquant	TG	868490	TG_2c	Q920E5	56_64	Farnesyl pyrophosphate synthase OS=Mus musculus OX=10090 GN=Fdps PE=1 SV=1	Fdps
KYNRGLTVV	9	H-2-Kd	SB	24.54	PD Mascot	Control	6400000	Control_1_1b	Q920E5	56_64	Farnesyl pyrophosphate synthase OS=Mus musculus OX=10090 GN=Fdps PE=1 SV=1	Fdps
KYNRGLTVV	9	H-2-Kd	SB	24.54	Maxquant	TG	280200	TG_1a	Q920E5	56_64	Farnesyl pyrophosphate synthase OS=Mus musculus OX=10090 GN=Fdps PE=1 SV=1	Fdps
KYNRGLTVV	9	H-2-Kd	SB	24.54	PD Mascot	Control	2100000	Control_1_1a	Q920E5	56_64	Farnesyl pyrophosphate synthase OS=Mus musculus OX=10090 GN=Fdps PE=1 SV=1	Fdps
KYNRGLTVV	9	H-2-Kd	SB	24.54	PD Mascot	TG	4100000	TG_1c	Q920E5	56_64	Farnesyl pyrophosphate synthase OS=Mus musculus OX=10090 GN=Fdps PE=1 SV=1	Fdps
KYNRGLTVV	9	H-2-Kd	SB	24.54	PD Mascot	TG	3700000	TG_1a	Q920E5	56_64	Farnesyl pyrophosphate synthase OS=Mus musculus OX=10090 GN=Fdps PE=1 SV=1	Fdps
KYNRGLTVV	9	H-2-Kd	SB	24.54	PD Mascot	TG	4600000	TG_1b	Q920E5	56_64	Farnesyl pyrophosphate synthase OS=Mus musculus OX=10090 GN=Fdps PE=1 SV=1	Fdps
KYNRGLTVV	9	H-2-Kd	SB	24.54	Maxquant	TG	822260	TG_2a	Q920E5	56_64	Farnesyl pyrophosphate synthase OS=Mus musculus OX=10090 GN=Fdps PE=1 SV=1	Fdps
KYNRGLTVV	9	H-2-Kd	SB	24.54	Maxquant	TG	1083500	TG_2b	Q920E5	56_64	Farnesyl pyrophosphate synthase OS=Mus musculus OX=10090 GN=Fdps PE=1 SV=1	Fdps
KYNRGLTVV	9	H-2-Kd	SB	24.54	Maxquant	TG	2239000	TG_1c	Q920E5	56_64	Farnesyl pyrophosphate synthase OS=Mus musculus OX=10090 GN=Fdps PE=1 SV=1	Fdps
KYNRIFRDL	9	H-2-Kd	SB	186.73	PD Mascot	TG	4800000	TG_1b	Q3TZX8	530_538	Polynucleotide 5'-hydroxyl-kinase NOL9 OS=Mus musculus OX=10090 GN=Nol9 PE=1 SV=1	Nol9
KYQDILNEI	9	H-2-Kd	SB	27.79	PD Sequest	TG	83000000	TG_1c	Q3UQ44	1391_1399	Ras GTPase-activating-like protein IQGAP2 OS=Mus musculus OX=10090 GN=Iqgap2 PE=1 SV=2	Iqgap2
KYQDILNEI	9	H-2-Kd	SB	27.79	PD Sequest	TG	4000000	TG_2a	Q3UQ44	1391_1399	Ras GTPase-activating-like protein IQGAP2 OS=Mus musculus OX=10090 GN=Iqgap2 PE=1 SV=2	Iqgap2
KYQDILNEI	9	H-2-Kd	SB	27.79	PD Sequest	TG	3400000	TG_2c	Q3UQ44	1391_1399	Ras GTPase-activating-like protein IQGAP2 OS=Mus musculus OX=10090 GN=Iqgap2 PE=1 SV=2	Iqgap2
KYQDILNEI	9	H-2-Kd	SB	27.79	PD Sequest	TG	120000000	TG_1a	Q3UQ44	1391_1399	Ras GTPase-activating-like protein IQGAP2 OS=Mus musculus OX=10090 GN=Iqgap2 PE=1 SV=2	Iqgap2
KYQDILNEI	9	H-2-Kd	SB	27.79	PD Sequest	TG	2600000	TG_2b	Q3UQ44	1391_1399	Ras GTPase-activating-like protein IQGAP2 OS=Mus musculus OX=10090 GN=Iqgap2 PE=1 SV=2	Iqgap2
KYQEVTNNL	9	H-2-Kd	SB	22.56	PD Mascot	TG	290000000	TG_2a	Q60865	95_103	Caprin-1 OS=Mus musculus OX=10090 GN=Caprin1 PE=1 SV=2	Caprin1
KYQEVTNNL	9	H-2-Kd	SB	22.56	PD Mascot	HG	460000000	HG_2a	Q60865	95_103	Caprin-1 OS=Mus musculus OX=10090 GN=Caprin1 PE=1 SV=2	Caprin1
KYQEVTNNL	9	H-2-Kd	SB	22.56	Maxquant	HG	189020000	HG_2b	Q60865	95_103	Caprin-1 OS=Mus musculus OX=10090 GN=Caprin1 PE=1 SV=2	Caprin1
KYQEVTNNL	9	H-2-Kd	SB	22.56	Maxquant	Control	469170000	Control_1_1b	Q60865	95_103	Caprin-1 OS=Mus musculus OX=10090 GN=Caprin1 PE=1 SV=2	Caprin1
KYQEVTNNL	9	H-2-Kd	SB	22.56	PD Mascot	Control	900000000	Control_1_1b	Q60865	95_103	Caprin-1 OS=Mus musculus OX=10090 GN=Caprin1 PE=1 SV=2	Caprin1
KYQEVTNNL	9	H-2-Kd	SB	22.56	PD Mascot	TG	640000000	TG_1c	Q60865	95_103	Caprin-1 OS=Mus musculus OX=10090 GN=Caprin1 PE=1 SV=2	Caprin1
KYQEVTNNL	9	H-2-Kd	SB	22.56	PD Mascot	HG	400000000	HG_1b	Q60865	95_103	Caprin-1 OS=Mus musculus OX=10090 GN=Caprin1 PE=1 SV=2	Caprin1
KYQEVTNNL	9	H-2-Kd	SB	22.56	PD Sequest	TG	290000000	TG_2a	Q60865	95_103	Caprin-1 OS=Mus musculus OX=10090 GN=Caprin1 PE=1 SV=2	Caprin1
KYQEVTNNL	9	H-2-Kd	SB	22.56	Maxquant	TG	148140000	TG_2c	Q60865	95_103	Caprin-1 OS=Mus musculus OX=10090 GN=Caprin1 PE=1 SV=2	Caprin1
KYQEVTNNL	9	H-2-Kd	SB	22.56	Maxquant	TG	109440000	TG_2b	Q60865	95_103	Caprin-1 OS=Mus musculus OX=10090 GN=Caprin1 PE=1 SV=2	Caprin1
KYQEVTNNL	9	H-2-Kd	SB	22.56	Maxquant	Control	65439000	Control_1_2a	Q60865	95_103	Caprin-1 OS=Mus musculus OX=10090 GN=Caprin1 PE=1 SV=2	Caprin1
KYQEVTNNL	9	H-2-Kd	SB	22.56	Maxquant	TG	266490000	TG_1c	Q60865	95_103	Caprin-1 OS=Mus musculus OX=10090 GN=Caprin1 PE=1 SV=2	Caprin1
KYQEVTNNL	9	H-2-Kd	SB	22.56	PD Mascot	Control	820000000	Control_1_1c	Q60865	95_103	Caprin-1 OS=Mus musculus OX=10090 GN=Caprin1 PE=1 SV=2	Caprin1
KYQEVTNNL	9	H-2-Kd	SB	22.56	PD Mascot	Control	840000000	Control_1_1a	Q60865	95_103	Caprin-1 OS=Mus musculus OX=10090 GN=Caprin1 PE=1 SV=2	Caprin1
KYQEVTNNL	9	H-2-Kd	SB	22.56	PD Sequest	HG	430000000	HG_2c	Q60865	95_103	Caprin-1 OS=Mus musculus OX=10090 GN=Caprin1 PE=1 SV=2	Caprin1
KYQEVTNNL	9	H-2-Kd	SB	22.56	Maxquant	HG	147960000	HG_1a	Q60865	95_103	Caprin-1 OS=Mus musculus OX=10090 GN=Caprin1 PE=1 SV=2	Caprin1
KYQEVTNNL	9	H-2-Kd	SB	22.56	PD Sequest	HG	400000000	HG_1a	Q60865	95_103	Caprin-1 OS=Mus musculus OX=10090 GN=Caprin1 PE=1 SV=2	Caprin1
KYQEVTNNL	9	H-2-Kd	SB	22.56	Maxquant	Control	63848000	Control_1_2b	Q60865	95_103	Caprin-1 OS=Mus musculus OX=10090 GN=Caprin1 PE=1 SV=2	Caprin1
KYQEVTNNL	9	H-2-Kd	SB	22.56	PD Sequest	TG	670000000	TG_1b	Q60865	95_103	Caprin-1 OS=Mus musculus OX=10090 GN=Caprin1 PE=1 SV=2	Caprin1
KYQEVTNNL	9	H-2-Kd	SB	22.56	PD Sequest	HG	400000000	HG_1b	Q60865	95_103	Caprin-1 OS=Mus musculus OX=10090 GN=Caprin1 PE=1 SV=2	Caprin1
KYQEVTNNL	9	H-2-Kd	SB	22.56	PD Sequest	TG	640000000	TG_1a	Q60865	95_103	Caprin-1 OS=Mus musculus OX=10090 GN=Caprin1 PE=1 SV=2	Caprin1
KYQEVTNNL	9	H-2-Kd	SB	22.56	Maxquant	Control	63727000	Control_1_2c	Q60865	95_103	Caprin-1 OS=Mus musculus OX=10090 GN=Caprin1 PE=1 SV=2	Caprin1
KYQEVTNNL	9	H-2-Kd	SB	22.56	PD Sequest	Control	820000000	Control_1_1c	Q60865	95_103	Caprin-1 OS=Mus musculus OX=10090 GN=Caprin1 PE=1 SV=2	Caprin1
KYQEVTNNL	9	H-2-Kd	SB	22.56	Maxquant	TG	305250000	TG_1b	Q60865	95_103	Caprin-1 OS=Mus musculus OX=10090 GN=Caprin1 PE=1 SV=2	Caprin1
KYQEVTNNL	9	H-2-Kd	SB	22.56	PD Sequest	TG	280000000	TG_2b	Q60865	95_103	Caprin-1 OS=Mus musculus OX=10090 GN=Caprin1 PE=1 SV=2	Caprin1
KYQEVTNNL	9	H-2-Kd	SB	22.56	PD Mascot	TG	640000000	TG_1a	Q60865	95_103	Caprin-1 OS=Mus musculus OX=10090 GN=Caprin1 PE=1 SV=2	Caprin1
KYQEVTNNL	9	H-2-Kd	SB	22.56	Maxquant	HG	122550000	HG_1c	Q60865	95_103	Caprin-1 OS=Mus musculus OX=10090 GN=Caprin1 PE=1 SV=2	Caprin1
KYQEVTNNL	9	H-2-Kd	SB	22.56	PD Mascot	Control	130000000	Control_1_2a	Q60865	95_103	Caprin-1 OS=Mus musculus OX=10090 GN=Caprin1 PE=1 SV=2	Caprin1
KYQEVTNNL	9	H-2-Kd	SB	22.56	Maxquant	HG	205420000	HG_1b	Q60865	95_103	Caprin-1 OS=Mus musculus OX=10090 GN=Caprin1 PE=1 SV=2	Caprin1
KYQEVTNNL	9	H-2-Kd	SB	22.56	PD Sequest	TG	300000000	TG_2c	Q60865	95_103	Caprin-1 OS=Mus musculus OX=10090 GN=Caprin1 PE=1 SV=2	Caprin1
KYQEVTNNL	9	H-2-Kd	SB	22.56	PD Sequest	Control	150000000	Control_1_2c	Q60865	95_103	Caprin-1 OS=Mus musculus OX=10090 GN=Caprin1 PE=1 SV=2	Caprin1
KYQEVTNNL	9	H-2-Kd	SB	22.56	PD Sequest	HG	430000000	HG_2b	Q60865	95_103	Caprin-1 OS=Mus musculus OX=10090 GN=Caprin1 PE=1 SV=2	Caprin1
KYQEVTNNL	9	H-2-Kd	SB	22.56	Maxquant	Control	326010000	Control_1_1c	Q60865	95_103	Caprin-1 OS=Mus musculus OX=10090 GN=Caprin1 PE=1 SV=2	Caprin1
KYQEVTNNL	9	H-2-Kd	SB	22.56	Maxquant	Control	801820000	Control_1_1a	Q60865	95_103	Caprin-1 OS=Mus musculus OX=10090 GN=Caprin1 PE=1 SV=2	Caprin1
KYQEVTNNL	9	H-2-Kd	SB	22.56	PD Sequest	HG	460000000	HG_2a	Q60865	95_103	Caprin-1 OS=Mus musculus OX=10090 GN=Caprin1 PE=1 SV=2	Caprin1
KYQEVTNNL	9	H-2-Kd	SB	22.56	PD Mascot	TG	300000000	TG_2c	Q60865	95_103	Caprin-1 OS=Mus musculus OX=10090 GN=Caprin1 PE=1 SV=2	Caprin1
KYQEVTNNL	9	H-2-Kd	SB	22.56	PD Sequest	Control	120000000	Control_1_2b	Q60865	95_103	Caprin-1 OS=Mus musculus OX=10090 GN=Caprin1 PE=1 SV=2	Caprin1
KYQEVTNNL	9	H-2-Kd	SB	22.56	PD Sequest	Control	130000000	Control_1_2a	Q60865	95_103	Caprin-1 OS=Mus musculus OX=10090 GN=Caprin1 PE=1 SV=2	Caprin1
KYQEVTNNL	9	H-2-Kd	SB	22.56	PD Mascot	HG	430000000	HG_2c	Q60865	95_103	Caprin-1 OS=Mus musculus OX=10090 GN=Caprin1 PE=1 SV=2	Caprin1
KYQEVTNNL	9	H-2-Kd	SB	22.56	PD Sequest	Control	840000000	Control_1_1a	Q60865	95_103	Caprin-1 OS=Mus musculus OX=10090 GN=Caprin1 PE=1 SV=2	Caprin1
KYQEVTNNL	9	H-2-Kd	SB	22.56	PD Mascot	TG	280000000	TG_2b	Q60865	95_103	Caprin-1 OS=Mus musculus OX=10090 GN=Caprin1 PE=1 SV=2	Caprin1
KYQEVTNNL	9	H-2-Kd	SB	22.56	PD Sequest	HG	340000000	HG_1c	Q60865	95_103	Caprin-1 OS=Mus musculus OX=10090 GN=Caprin1 PE=1 SV=2	Caprin1
KYQEVTNNL	9	H-2-Kd	SB	22.56	Maxquant	HG	239580000	HG_2a	Q60865	95_103	Caprin-1 OS=Mus musculus OX=10090 GN=Caprin1 PE=1 SV=2	Caprin1
KYQEVTNNL	9	H-2-Kd	SB	22.56	PD Mascot	TG	670000000	TG_1b	Q60865	95_103	Caprin-1 OS=Mus musculus OX=10090 GN=Caprin1 PE=1 SV=2	Caprin1
KYQEVTNNL	9	H-2-Kd	SB	22.56	PD Sequest	TG	640000000	TG_1c	Q60865	95_103	Caprin-1 OS=Mus musculus OX=10090 GN=Caprin1 PE=1 SV=2	Caprin1
KYQEVTNNL	9	H-2-Kd	SB	22.56	Maxquant	TG	128440000	TG_2a	Q60865	95_103	Caprin-1 OS=Mus musculus OX=10090 GN=Caprin1 PE=1 SV=2	Caprin1
KYQEVTNNL	9	H-2-Kd	SB	22.56	Maxquant	HG	194330000	HG_2c	Q60865	95_103	Caprin-1 OS=Mus musculus OX=10090 GN=Caprin1 PE=1 SV=2	Caprin1
KYQEVTNNL	9	H-2-Kd	SB	22.56	PD Mascot	HG	400000000	HG_1a	Q60865	95_103	Caprin-1 OS=Mus musculus OX=10090 GN=Caprin1 PE=1 SV=2	Caprin1
KYQEVTNNL	9	H-2-Kd	SB	22.56	PD Sequest	Control	900000000	Control_1_1b	Q60865	95_103	Caprin-1 OS=Mus musculus OX=10090 GN=Caprin1 PE=1 SV=2	Caprin1
KYQEVTNNL	9	H-2-Kd	SB	22.56	Maxquant	TG	265460000	TG_1a	Q60865	95_103	Caprin-1 OS=Mus musculus OX=10090 GN=Caprin1 PE=1 SV=2	Caprin1
KYQEVTNNL	9	H-2-Kd	SB	22.56	PD Mascot	HG	340000000	HG_1c	Q60865	95_103	Caprin-1 OS=Mus musculus OX=10090 GN=Caprin1 PE=1 SV=2	Caprin1
KYQIAVTKV	9	H-2-Kd	SB	33.88	Maxquant	TG	6750300	TG_1c	Q9CU62	528_536	Structural maintenance of chromosomes protein 1A OS=Mus musculus OX=10090 GN=Smc1a PE=1 SV=4	Smc1a
KYQIAVTKV	9	H-2-Kd	SB	33.88	PD Mascot	TG	17000000	TG_1b	Q9CU62	528_536	Structural maintenance of chromosomes protein 1A OS=Mus musculus OX=10090 GN=Smc1a PE=1 SV=4	Smc1a
KYQIAVTKV	9	H-2-Kd	SB	33.88	Maxquant	HG	1811800	HG_1b	Q9CU62	528_536	Structural maintenance of chromosomes protein 1A OS=Mus musculus OX=10090 GN=Smc1a PE=1 SV=4	Smc1a
KYQIAVTKV	9	H-2-Kd	SB	33.88	Maxquant	TG	7487500	TG_1b	Q9CU62	528_536	Structural maintenance of chromosomes protein 1A OS=Mus musculus OX=10090 GN=Smc1a PE=1 SV=4	Smc1a
KYQIAVTKV	9	H-2-Kd	SB	33.88	PD Mascot	Control	15000000	Control_1_1a	Q9CU62	528_536	Structural maintenance of chromosomes protein 1A OS=Mus musculus OX=10090 GN=Smc1a PE=1 SV=4	Smc1a
KYQIAVTKV	9	H-2-Kd	SB	33.88	PD Sequest	TG	3300000	TG_2b	Q9CU62	528_536	Structural maintenance of chromosomes protein 1A OS=Mus musculus OX=10090 GN=Smc1a PE=1 SV=4	Smc1a
[truncated: 3,066 more rows]
